# Supplementary material
Source: publisher figshare collection journal article supplement (https://plos.figshare.com/articles/dataset/_/121383)
Supplement: Supplementary file 1 [file 1]

Archive with 22 entries (22 files):
- Figure_S1.pdf
- Figure_S2.pdf
- Figure_S3.pdf
- Figure_S4.pdf
- Figure_S5.pdf
- Figure_S6.pdf
- Figure_S7.pdf
- Figure_S8.pdf
- Figure_S9.pdf
- Figure_S10.pdf
- Figure_S11.pdf
- Figure_S12.pdf
- Figure_S13.pdf
- Figure_S14.pdf
- Table_S1.pdf
- File_S1.txt
- File_S2.txt
- File_S3.xlsx
- File_S4.xlsx
- File_S5.xlsx
- File_S6.xlsx
- File_S7.txt
