# Supplementary material
Source: publisher figshare collection journal article supplement (https://plos.figshare.com/articles/dataset/_/121383)

Figure S1. The number of reads returned having errors within sequence tags of different lengths at uniformly distributed sequencing error rates of 1%, 5%, and 18%. The simulation assumes 1 million reads are returned per sequencing run.

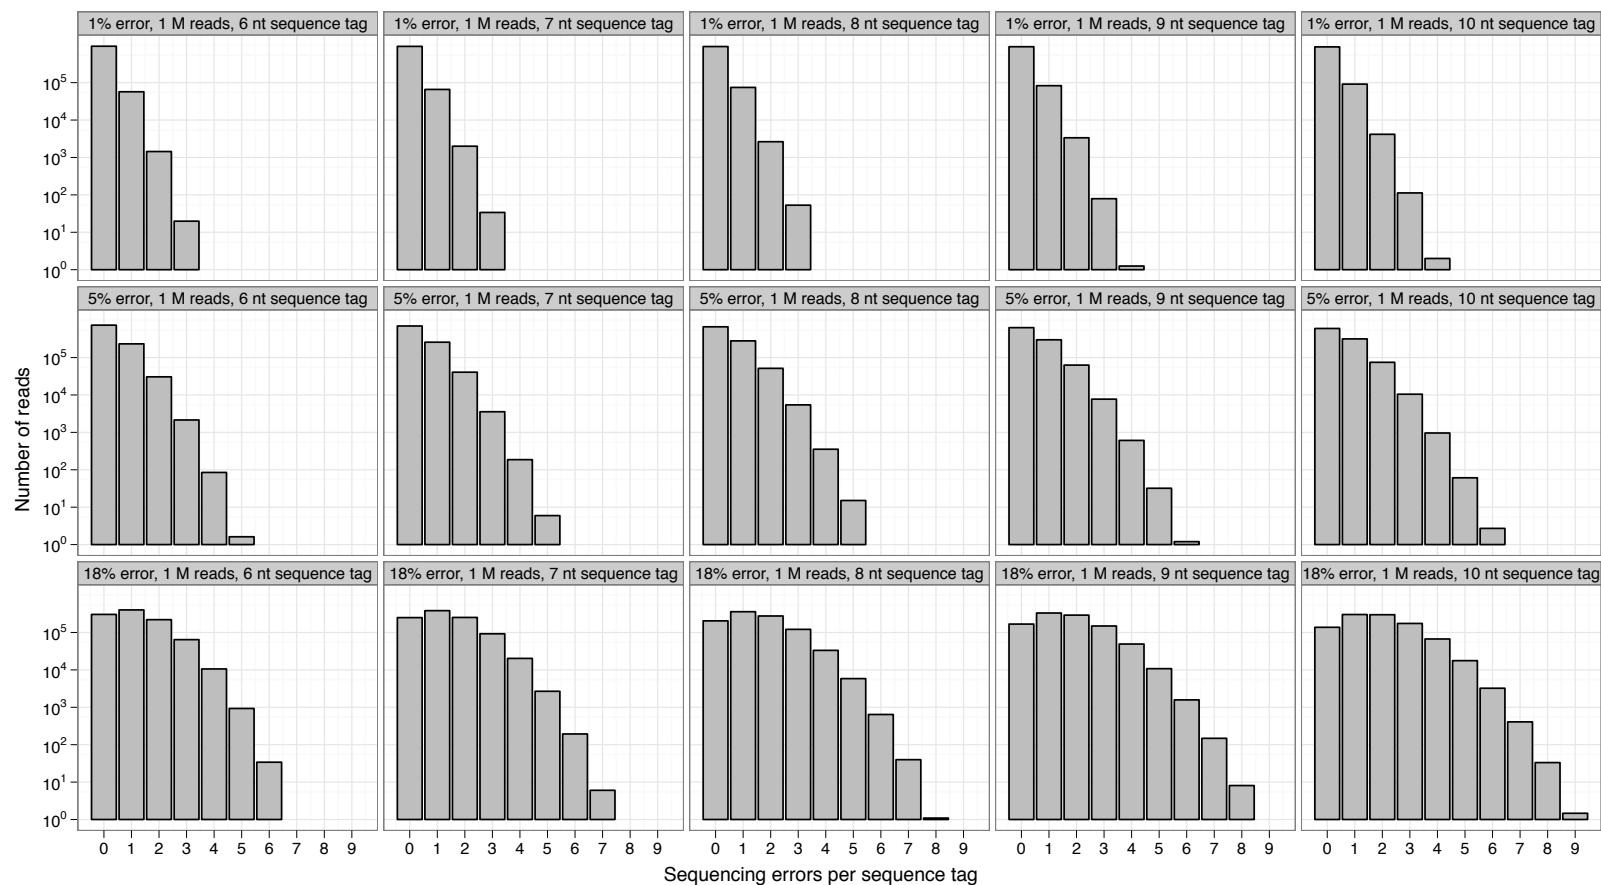

Supplement: Supplementary file 1 [file 1 › Figure_S1.pdf]
