# Supplementary material
Source: publisher figshare collection journal article supplement (https://plos.figshare.com/articles/dataset/_/121383)

Figure S4. Pairwise edit distances between 75 sequence tags designed using `create_index_sequences.py` from Meyer *et al.* 2010. We generated these tags using: `python create_index_sequences.py -l <length> -d 3`. The minimum expected edit distance of the set is three. The minimum observed edit distance of the set is two.

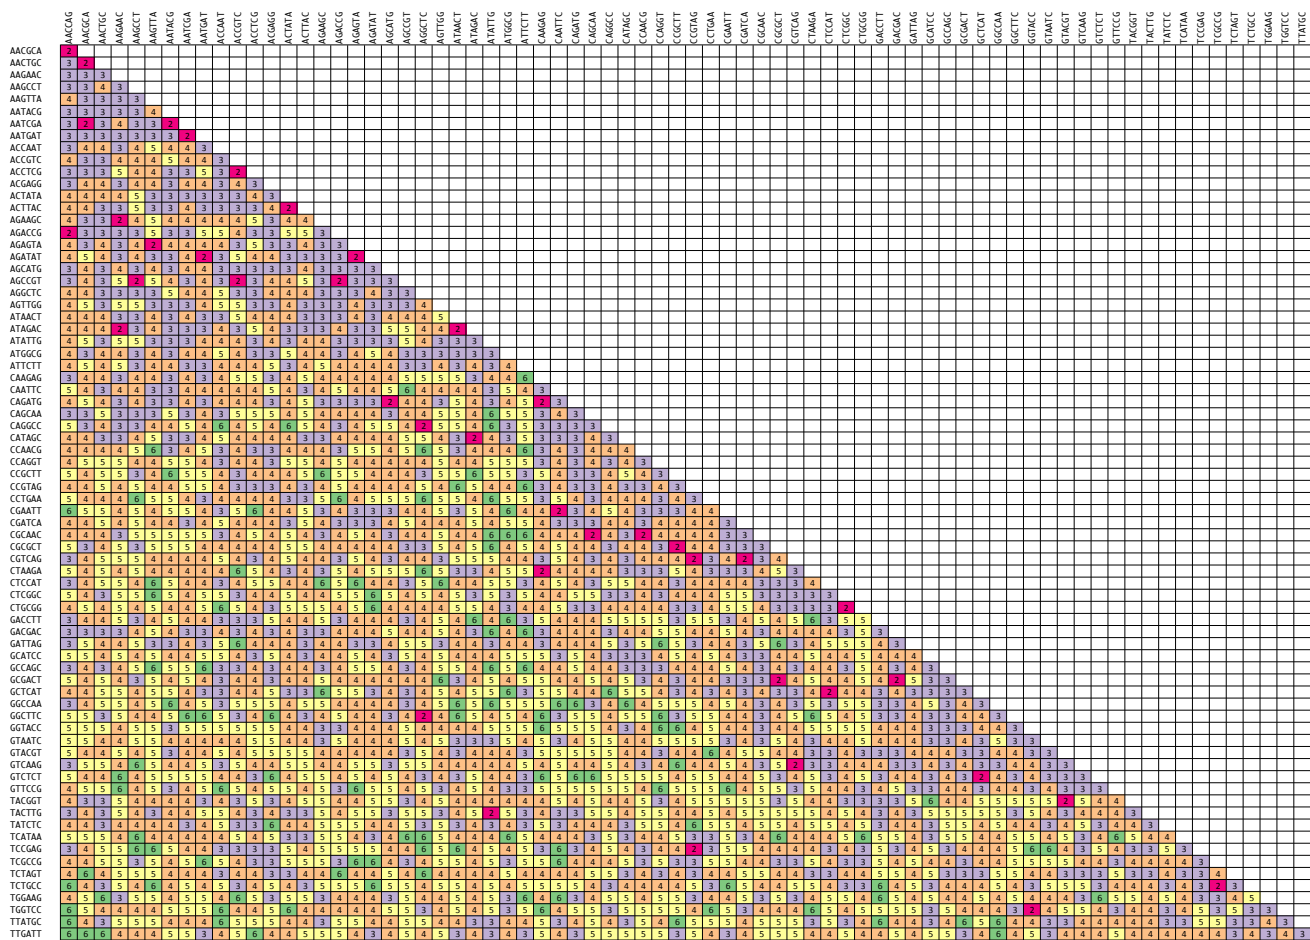

Supplement: Supplementary file 1 [file 1 › Figure_S4.pdf]
