# Supplementary material
Source: publisher figshare collection journal article supplement (https://plos.figshare.com/articles/dataset/_/121383)
Supplement: Supplementary file 1 [file 1 › Figure_S5.pdf]

Figure S5. Pairwise edit distance comparisons between 24 sequence tags described in Qiu *et al.* 2003. The minimum expected edit distance of the set is three. The minimum observed edit distance of the set is three.

|        | ATAGC | ACTGGC | CACAGC | TAACCC | CAGGCG | AGGTAC | TGAGCG | GACCAC | AATCGG | CTAAGG | GAAGAG | AGTGAG | GTGGAC | GTCACC | CGTCCA | GATGCC | AAGACC | GCCTCA | CTAGCC | TACGGA |
|--------|-------|--------|--------|--------|--------|--------|--------|--------|--------|--------|--------|--------|--------|--------|--------|--------|--------|--------|--------|--------|
| ACTGGC | 3     |        |        |        |        |        |        |        |        |        |        |        |        |        |        |        |        |        |        |        |
| CACAGC | 3     | 3      |        |        |        |        |        |        |        |        |        |        |        |        |        |        |        |        |        |        |
| TAACCC | 3     | 5      | 4      |        |        |        |        |        |        |        |        |        |        |        |        |        |        |        |        |        |
| CAGGCG | 4     | 3      | 3      | 4      |        |        |        |        |        |        |        |        |        |        |        |        |        |        |        |        |
| AGGTAC | 4     | 4      | 5      | 5      | 4      |        |        |        |        |        |        |        |        |        |        |        |        |        |        |        |
| TGAGCG | 4     | 4      | 4      | 3      | 3      | 5      |        |        |        |        |        |        |        |        |        |        |        |        |        |        |
| GACCAC | 4     | 4      | 3      | 3      | 5      | 4      | 4      |        |        |        |        |        |        |        |        |        |        |        |        |        |
| AATCGG | 3     | 3      | 4      | 4      | 4      | 5      | 4      | 4      |        |        |        |        |        |        |        |        |        |        |        |        |
| CTAAGG | 3     | 4      | 3      | 4      | 3      | 6      | 3      | 6      | 4      |        |        |        |        |        |        |        |        |        |        |        |
| GAAGAG | 5     | 5      | 4      | 4      | 3      | 4      | 3      | 3      | 4      | 3      |        |        |        |        |        |        |        |        |        |        |
| AGTGAG | 4     | 3      | 5      | 6      | 3      | 3      | 3      | 5      | 3      | 4      | 3      |        |        |        |        |        |        |        |        |        |
| GTGGAC | 4     | 3      | 5      | 5      | 4      | 3      | 4      | 3      | 5      | 5      | 3      | 3      |        |        |        |        |        |        |        |        |
| GTCACC | 3     | 5      | 3      | 3      | 5      | 4      | 4      | 3      | 5      | 4      | 5      | 4      | 3      |        |        |        |        |        |        |        |
| CGTCCA | 5     | 5      | 5      | 4      | 4      | 4      | 4      | 3      | 4      | 5      | 5      | 4      | 4      | 3      |        |        |        |        |        |        |
| GATGCC | 3     | 3      | 4      | 3      | 3      | 4      | 3      | 3      | 4      | 5      | 3      | 4      | 3      | 3      | 4      |        |        |        |        |        |
| AAGACC | 3     | 4      | 3      | 3      | 3      | 3      | 4      | 4      | 4      | 5      | 3      | 4      | 4      | 3      | 4      | 3      |        |        |        |        |
| GCCTCA | 5     | 5      | 5      | 5      | 5      | 5      | 5      | 3      | 5      | 5      | 5      | 5      | 5      | 3      | 3      | 4      | 5      |        |        |        |
| CTAGCC | 3     | 3      | 3      | 3      | 3      | 5      | 3      | 4      | 5      | 3      | 4      | 5      | 3      | 3      | 4      | 3      | 3      | 5      |        |        |
| TACGGA | 3     | 3      | 3      | 4      | 4      | 4      | 4      | 4      | 3      | 3      | 4      | 4      | 4      | 5      | 5      | 4      | 5      | 4      | 4      |        |
| GCAGGA | 4     | 3      | 4      | 5      | 3      | 4      | 4      | 4      | 5      | 4      | 3      | 4      | 3      | 4      | 5      | 4      | 5      | 3      | 4      | 3      |
