# Supplementary material
Source: publisher figshare collection journal article supplement (https://plos.figshare.com/articles/dataset/_/121383)

Figure 66. Pairwise edit distance comparisons between 132 sequence tags provided as part of the Roche 454, Inc. multiplex identification (MID) tag set. The minimum expected edit distance of the set is four. The minimum observed edit distance of the set is four.

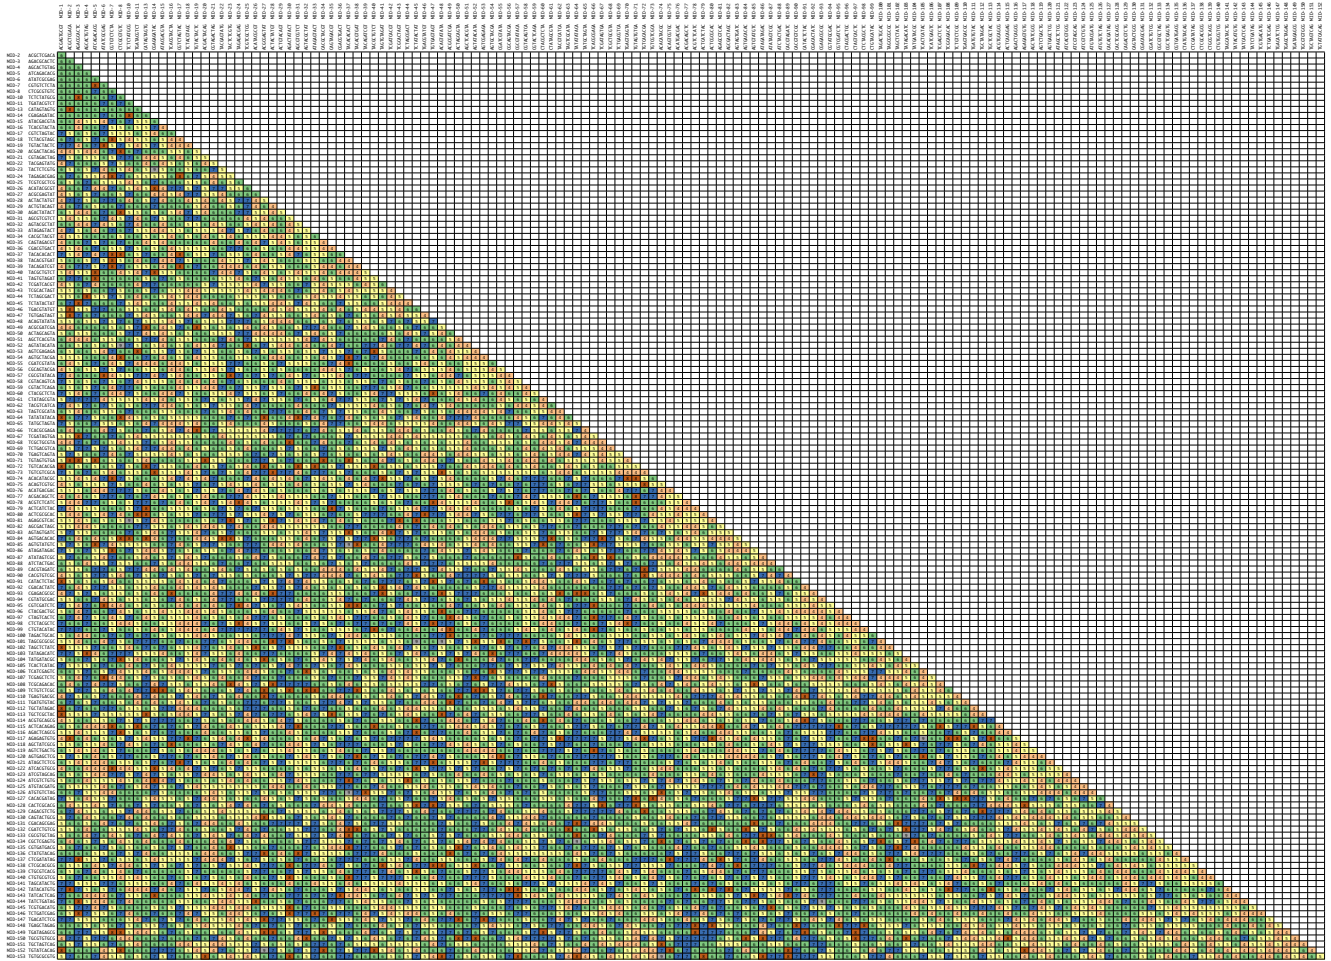

Supplement: Supplementary file 1 [file 1 › Figure_S6.pdf]
