# Supplementary material
Source: publisher figshare collection journal article supplement (https://plos.figshare.com/articles/dataset/_/121383)

Figure S7. Pairwise edit distance comparisons between 122 sequence tags provided as part of the Roche-454, Inc. rapid library multiplex identification (RL-MID) tag set. The minimum expected edit distance of the set is four. The minimum observed edit distance of the set is four.

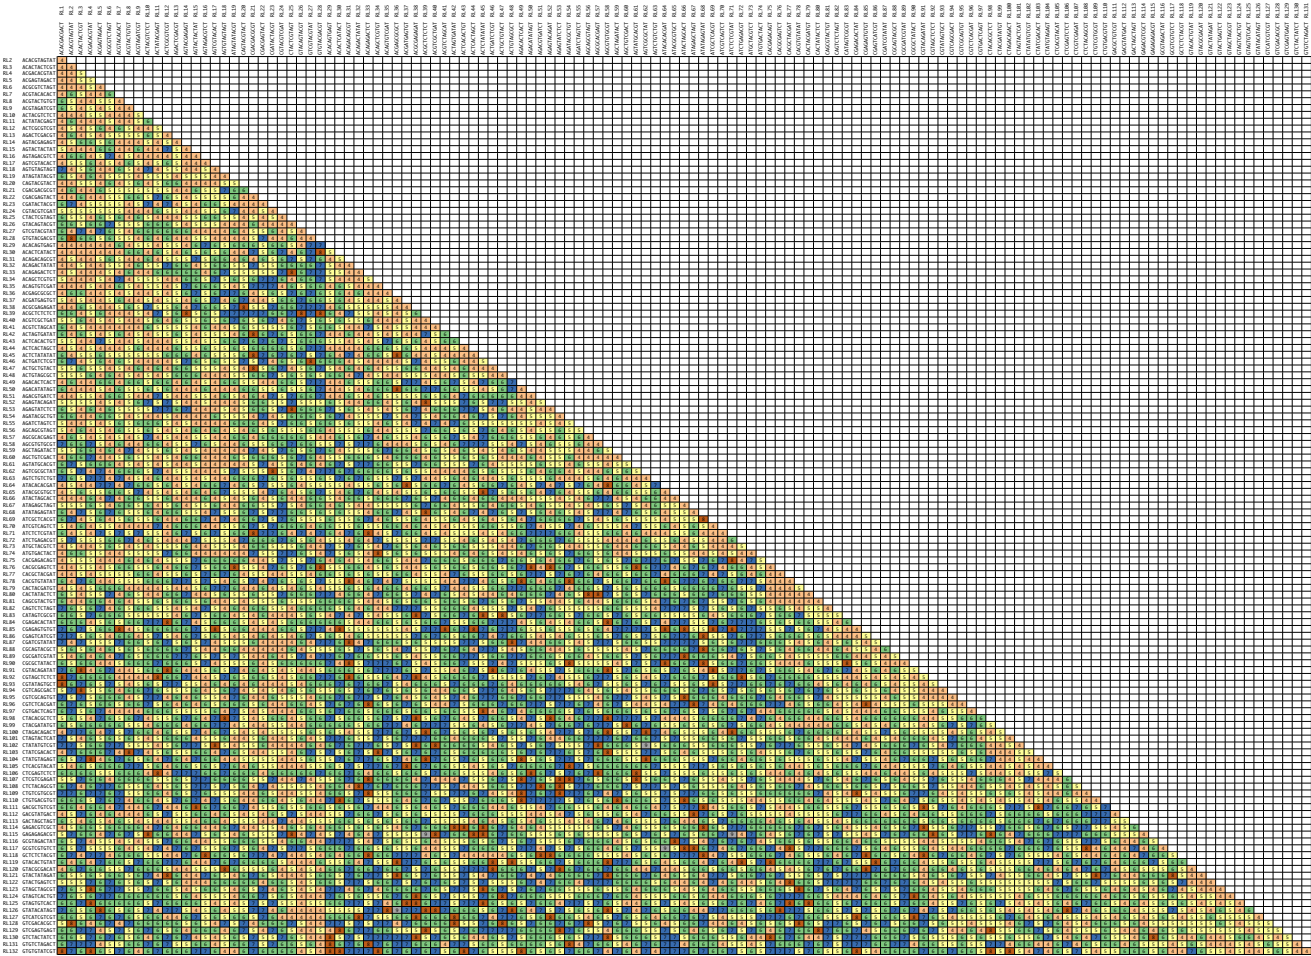

Supplement: Supplementary file 1 [file 1 › Figure_S7.pdf]
