# Supplementary material
Source: publisher figshare collection journal article supplement (https://plos.figshare.com/articles/dataset/_/121383)
Supplement: Supplementary file 1 [file 1 › Figure_S9.pdf]

Figure S9. Pairwise Hamming distance comparisons between the 48 sequence tags provided as part of the Illumina TruSeq library preparation kits. The tags used within the DNA and RNA kits are a subset of those used within the smallRNA kit. The minimum expected Hamming distance of the set is three. The minimum observed Hamming distance of the set is two.

[illegible]
