# Supplementary material
Source: publisher figshare collection journal article supplement (https://plos.figshare.com/articles/dataset/_/121383)

Figure S10. Agarose gel image of *rbcLa* amplicons generated using fusion-style primers integrating 10 nucleotide, edit distance five sequence tags.

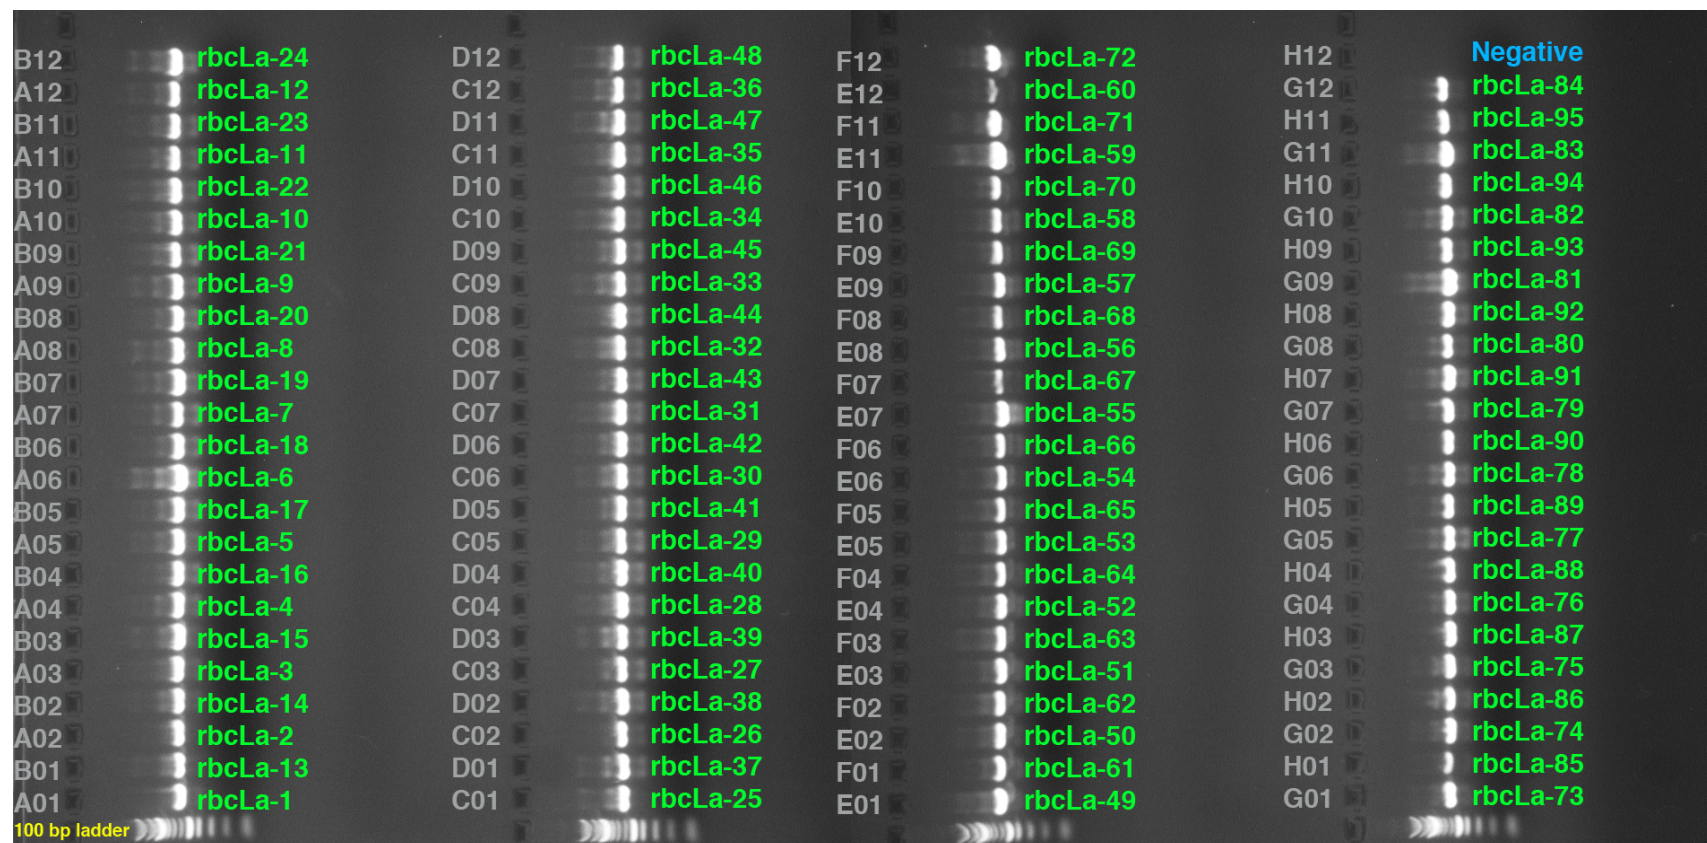

Supplement: Supplementary file 1 [file 1 › Figure_S10.pdf]
