# Supplementary material
Source: publisher figshare collection journal article supplement (https://plos.figshare.com/articles/dataset/_/121383)
Supplement: Supplementary file 1 [file 1 › Figure_S11.pdf]

Figure S11. Fold difference in the average number of reads per well (across two plates) for PCR amplicons incorporating sequence tags designed using EDITTAG relative to the average number of reads per plate.

|    | A   | B   | C   | D   | E   | F   | G   | H   |
|----|-----|-----|-----|-----|-----|-----|-----|-----|
| 1  | 1.8 | 1.4 | 1.6 | 1.8 | 0.7 | 1.1 | 0.6 | 0.5 |
| 2  | 2.1 | 1.1 | 0.9 | 1.8 | 0.7 | 1.2 | 1.1 | 0.5 |
| 3  | 1.4 | 0.7 | 0.2 | 0.8 | 1.2 | 1.3 | 0.9 | 1.5 |
| 4  | 0.7 | 1.4 | 0.4 | 1.4 | 0.8 | 1.0 | 0.7 | 1.5 |
| 5  | 1.6 | 0.9 | 0.8 | 3.3 | 1.0 | 0.8 | 2.3 | 0.6 |
| 6  | 0.2 | 1.3 | 1.0 | 2.3 | 1.3 | 0.4 | 0.8 | 0.5 |
| 7  | 0.9 | 1.5 | 1.0 | 1.8 | 0.3 | 1.3 | 1.1 | 0.6 |
| 8  | 0.5 | 1.2 | 2.7 | 0.7 | 0.6 | 0.6 | 1.0 | 0.4 |
| 9  | 0.5 | 0.4 | 0.8 | 1.5 | 0.6 | 0.5 | 1.3 | 0.4 |
| 10 | 0.9 | 0.6 | 1.1 | 1.1 | 0.8 | 0.4 | 1.4 | 0.7 |
| 11 | 1.2 | 0.9 | 1.1 | 0.7 | 1.0 | 0.6 | 0.7 | 1.2 |
| 12 | 0.7 | 0.7 | 1.3 | 0.3 | 0.5 | 0.4 | 0.2 | NEG |

|                        |      |
|------------------------|------|
| Average reads per well | 20.9 |
| Mean fold difference   | 1.0  |
| Mean fold diff. 95 CI  | 0.1  |
