# Supplementary material
Source: publisher figshare collection journal article supplement (https://plos.figshare.com/articles/dataset/_/121383)

Figure S12. Comparison of the number of reads returned for libraries incorporating adapters having six nucleotide Epicentre Nextera indices or EDITTAG-designed indices.

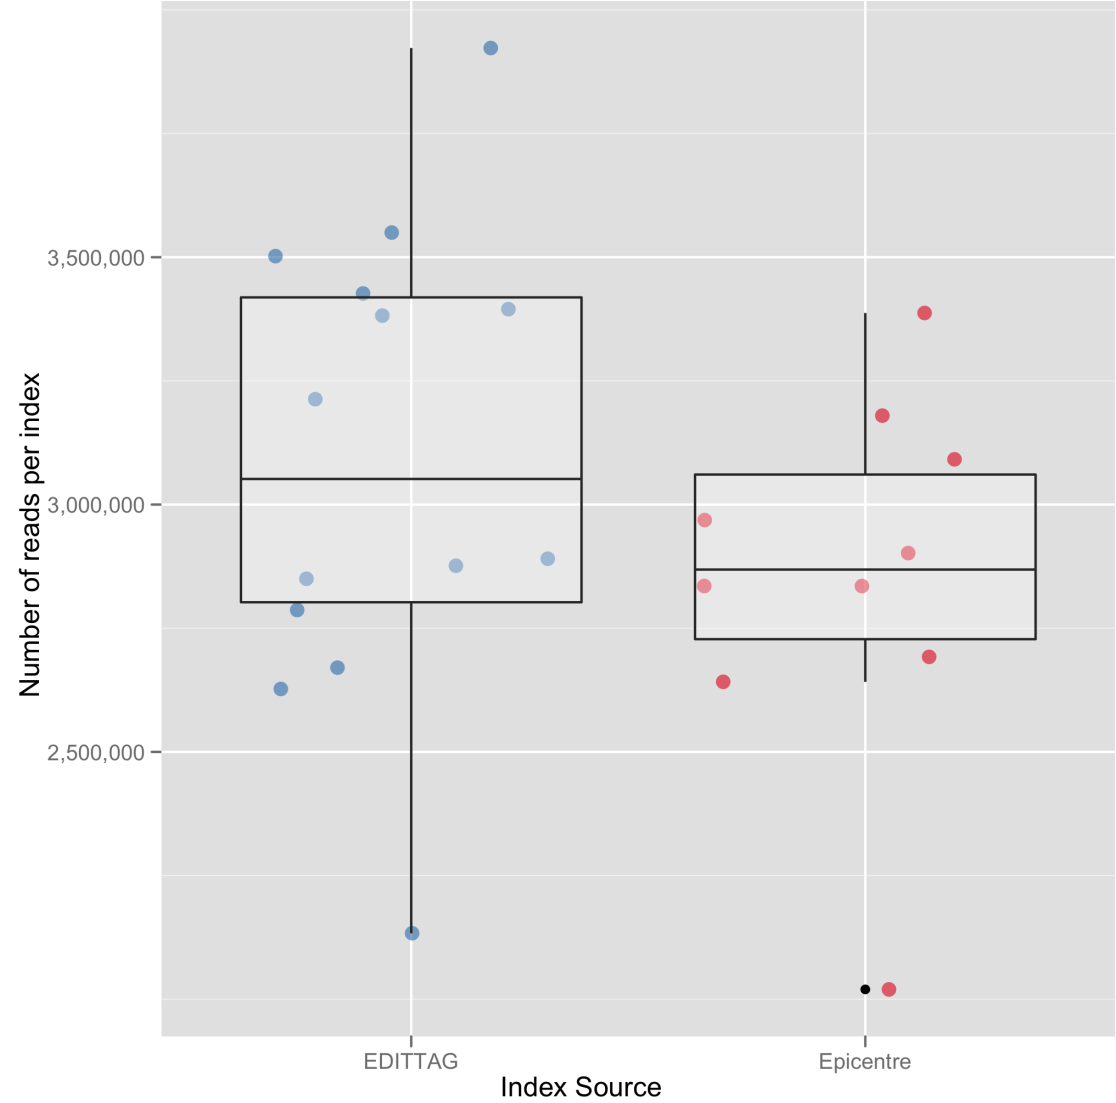

Supplement: Supplementary file 1 [file 1 › Figure_S12.pdf]
