# Supplementary material
Source: publisher figshare collection journal article supplement (https://plos.figshare.com/articles/dataset/_/121383)

Figure S13. Comparison of the number of reads returned for libraries prepared by (A) ligating an adapter pool to DNA fragments and (B) ligating individual adapters to DNA fragments. Although the number of reads are different between runs, note that variance is much higher (>2 orders of magnitude) in (A). Additionally, some adapters (e.g., BFIDT-012) performing poorly in (A) function well in (B).

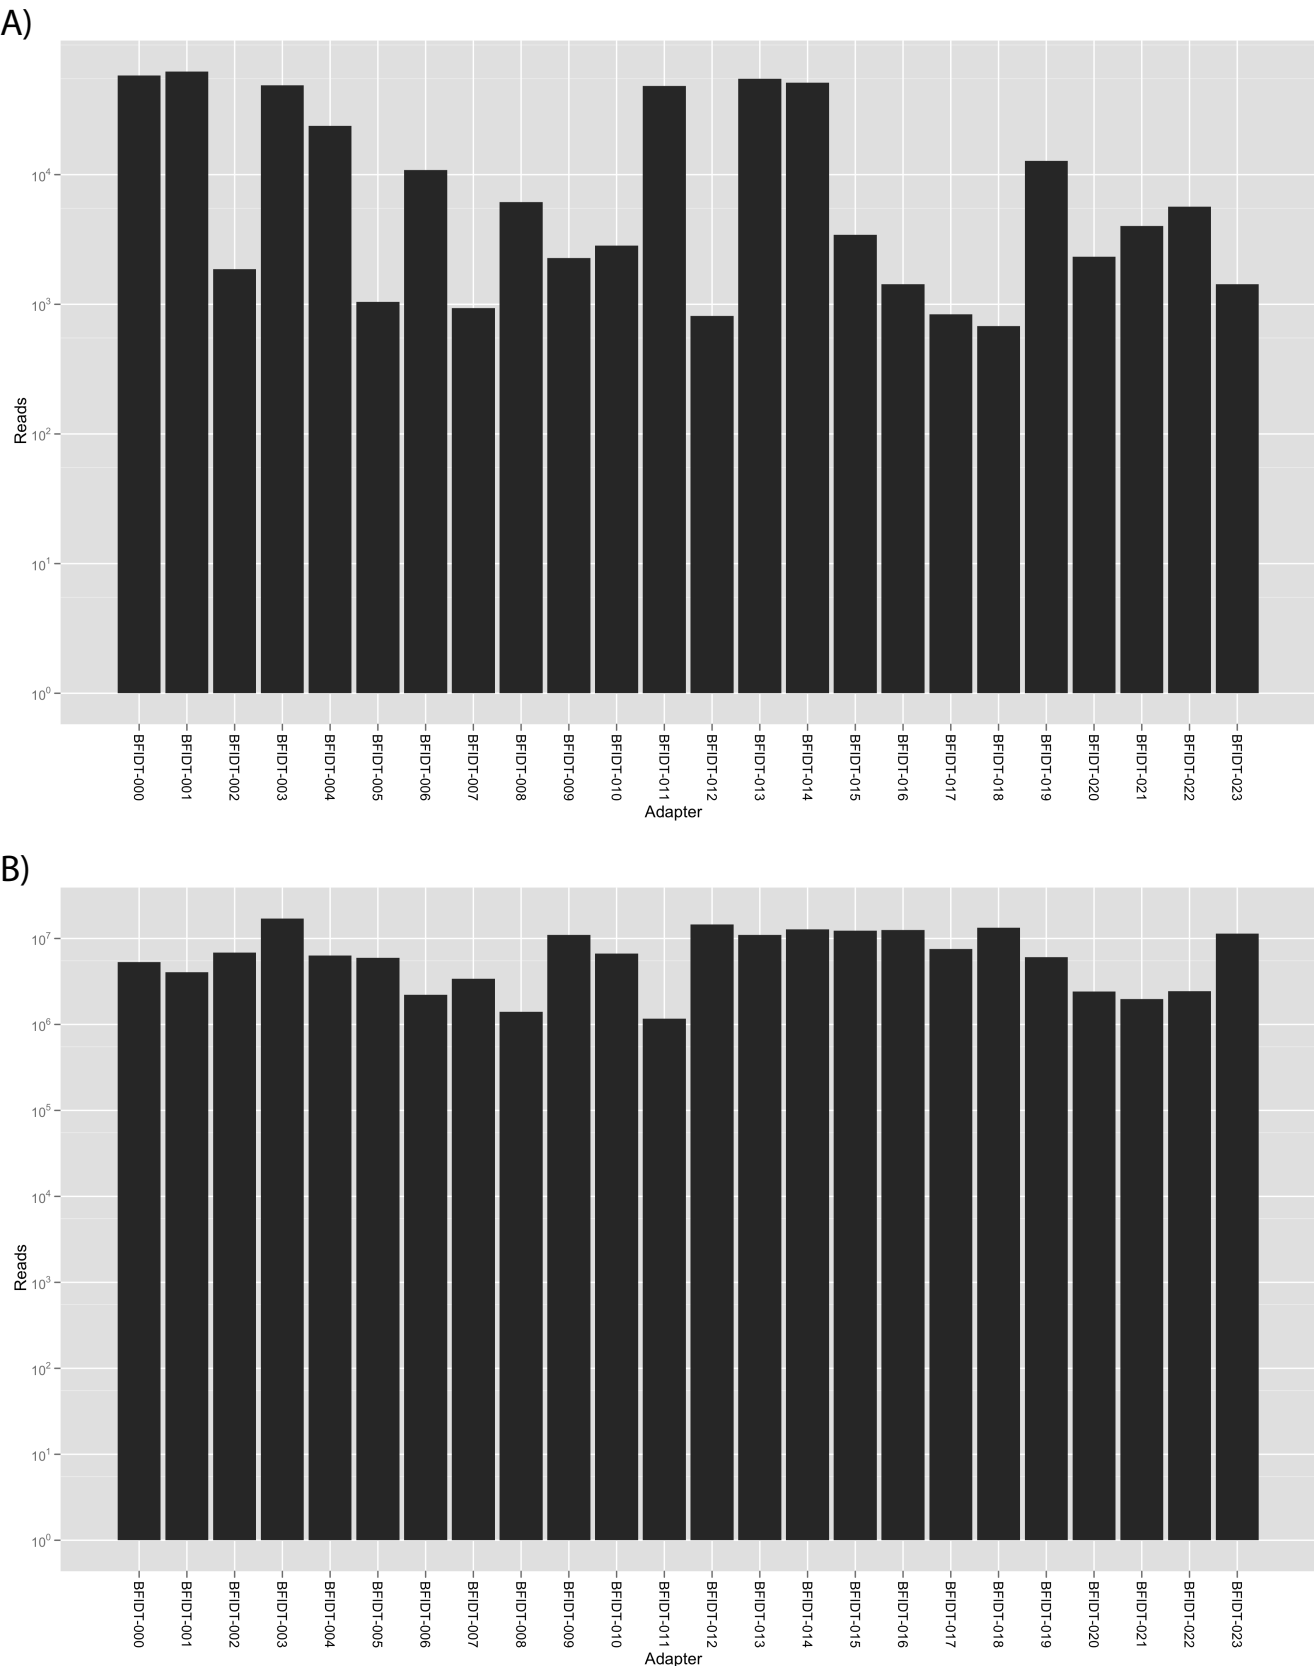

Supplement: Supplementary file 1 [file 1 › Figure_S13.pdf]
