# Supplementary material
Source: publisher figshare collection journal article supplement (https://plos.figshare.com/articles/dataset/_/121383)

Figure S14. Comparison of the number of reads returned for 64 libraries incorporating adapters having 10 nucleotide EDITTAG-designed indices versus 12 libraries incorporating Illumina TruSeq adapters. Outliers represent failed enrichments.

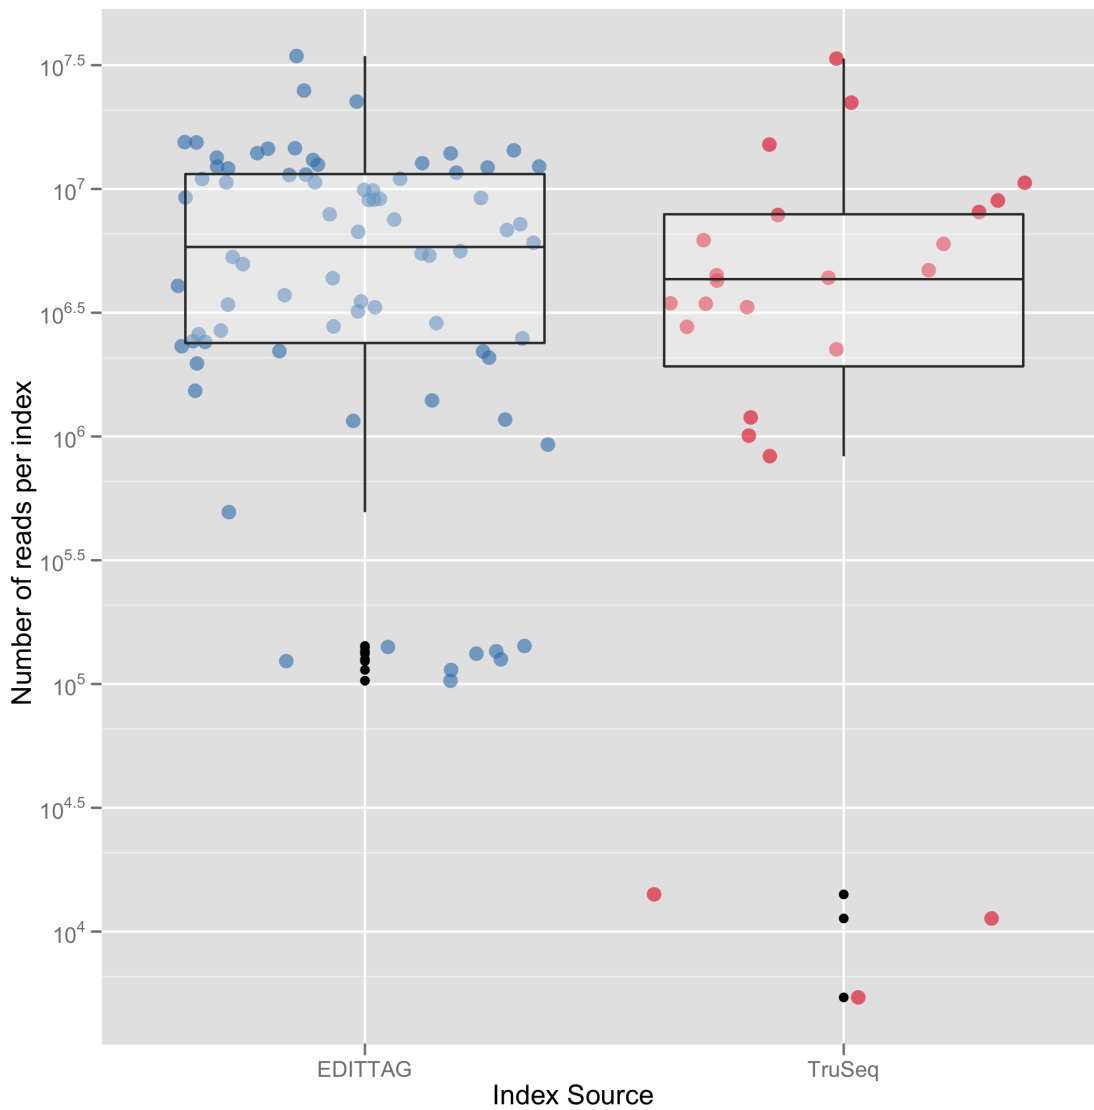

Supplement: Supplementary file 1 [file 1 › Figure_S14.pdf]
