# Supplementary material
Source: publisher figshare collection journal article supplement (https://plos.figshare.com/articles/dataset/_/121383)
Supplement: Supplementary file 1 [file 1 › File_S1.txt]

#  This is a python configuration file formatted for use with edittag:
#
# python validate_edit_metric_tags.py \
#    --input supplementary-file-1.txt \
#    --section "5nt ed3" \
#    --verbose
#
# Generally speaking, the section header in brackets denotes the source
# of the tags below.  In cases where we have used a program to generate
# tags, I have included the CLI call that I used to do that.
#
# Several index sequences in this file are derived from the Illumina
# TruSeq adapter system, and:
#
# Oligonucleotide sequences (c) 2007‐2011 Illumina, Inc. All rights reserved.
#
# Other index sequences in this file are derived from the Roche extended MID
# and extended RL-MID sequences, which are (c) 2008-2010 Roche.
#
# For manuscript references, please see the full text of the EDITTAG
# manuscript.

[Adey et al. 2010 9nt]
Tag1:TACGAAGTC
Tag2:GACGAGATT
Tag3:ACCGTAAGA
Tag4:TAGTGGCAA
Tag5:CATTAACGC
Tag6:TCGTTGAAG
Tag7:TAGTACGCT
Tag8:CTCAGATCA
Tag9:TTCACCGTA
Tag10:GTCATGCAT
Tag11:AGGACAGTT
Tag12:ATGGTGTCT
Tag13:GGATGTTCT
Tag14:CTTATCCAG
Tag15:GTAAGTCAC
Tag16:TTCAGTGAG
Tag17:CTCGTAATG
Tag18:CATGTCTCA
Tag19:AATCGTGGA
Tag20:GTATCAGTC
Tag21:AGCAGATGT
Tag22:TCCTAACGT
Tag23:AACAGTCCA
Tag24:CCTTGAGAA
Tag25:TTAAGCCTG
Tag26:TTAGACCAC
Tag27:TGTCTAGTG
Tag28:TAGATCGAG
Tag29:TGAATGCCA
Tag30:GTGCAATGT
Tag31:AGTGGCATA
Tag32:ATGATCGGT
Tag33:AGTCTACCT
Tag34:GATCAACTG
Tag35:ATCGGTAGT
Tag36:CGTATGATG
Tag37:TTACTGACG
Tag38:CTGTCGTAA
Tag39:TCAACTGGT
Tag40:ATCGATCTC
Tag41:GCAACTATG
Tag42:GATGACTTC
Tag43:GACGTTACA
Tag44:CATCTGCTA
Tag45:ATTAGTCGG
Tag46:TAGCGTACT
Tag47:CCAAGCAAT
Tag48:CCGTAATTG
Tag49:AGAATTGCC
Tag50:ACCTGTAAC
Tag51:CATCAGTGT
Tag52:GAATCCTCA
Tag53:GCTGTATAC
Tag54:GAAGGCTAT
Tag55:GGAATCGAT
Tag56:GCTTATGGT
Tag57:TGACGCATT
Tag58:CACGATTCT
Tag59:TATTGCCTC
Tag60:AAGTCAGAG
Tag61:ATAGCTGAG
Tag62:TGCTCACAA
Tag63:GTCTTCTGA
Tag64:TTGCCGATT
Tag65:CTCGAATAC
Tag66:TGGCTTCTA
Tag67:AAGGCCATT
Tag68:AAGTTGACC
Tag69:CTGAACTGA
Tag70:CTAGGTGTA
Tag71:CCATCTTAG
Tag72:CTACGACAT
Tag73:TCCAACATG
Tag74:GCTATCATC
Tag75:ACAGCTTCA
Tag76:AGTCATTGC
Tag77:AGATCTCGA
Tag78:ATGCTCTTG
Tag79:TTAGTGCGT
Tag80:TCCTAGTTC
Tag81:GGTGCATTA
Tag82:ACTGAGGAT
Tag83:TAGCAGTCA
Tag84:TCACTCGAA
Tag85:ACCAATCAG
Tag86:GATATGGAC
Tag87:TGAGAGATC
Tag88:TGCCATTAG
Tag89:ACTAACGCA
Tag90:ATGTAGCAC
Tag91:GGTCGATAT
Tag92:GCGAGTTAT
Tag93:GACTGAGTA
Tag94:AGATACTCC
Tag95:GCTAGAGTT
Tag96:AATGTAGCG
[Meyer et al. 2008 7nt]
Tag1:TGACGTG
Tag2:ACAGCTG
Tag3:AGCACTG
Tag4:TACTATG
Tag5:TCTGATG
Tag6:ATGCATG
Tag7:ACTGTCG
Tag8:TACGTCG
Tag9:TGTCTCG
Tag10:AGCTGCG
Tag11:TCATGCG
Tag12:TATAGCG
Tag13:ACGAGCG
Tag14:ATCGACG
Tag15:TGAGACG
Tag16:TAGCACG
Tag17:ACACACG
Tag18:AGAGTAG
Tag19:TCACTAG
Tag20:TAGATAG
Tag21:ATGTGAG
Tag22:AGTCGAG
Tag23:TGCAGAG
Tag24:TCGTCAG
Tag25:TGTGCAG
Tag26:TCGTGTC
Tag27:TGCTCTC
Tag28:AGATATC
Tag29:TATCATC
Tag30:TGAGTGC
Tag31:TCGATGC
Tag32:TAGTCGC
Tag33:ACTGCGC
Tag34:TGTACGC
Tag35:ACGTAGC
Tag36:TACGAGC
Tag37:ATAGAGC
Tag38:AGTCAGC
Tag39:TCACAGC
Tag40:TATGTAC
Tag41:ATGCTAC
Tag42:AGTATAC
Tag43:TGATGAC
Tag44:TAGCGAC
Tag45:ACACGAC
Tag46:TCTAGAC
Tag47:ATCAGAC
Tag48:ATATCAC
Tag49:AGCGCAC
Tag50:TCAGCAC
Tag51:ACGACAC
Tag52:TACACAC
[Meyer et al. 2008 8nt]
Tag1:TCTCTGTG
Tag2:TGTACGTG
Tag3:ATCGTCTG
Tag4:TAGCTCTG
Tag5:AGTATCTG
Tag6:TCGAGCTG
Tag7:TCATACTG
Tag8:TACGACTG
Tag9:ACTCACTG
Tag10:AGAGTATG
Tag11:AGCTGATG
Tag12:TATCGATG
Tag13:ATGCGATG
Tag14:ACGTCATG
Tag15:TCATGTCG
Tag16:TAGCGTCG
Tag17:TCTACTCG
Tag18:ATGACTCG
Tag19:ATCTATCG
Tag20:ACAGATCG
Tag21:ATACTGCG
Tag22:TATATGCG
Tag23:TGCTCGCG
Tag24:ATCGCGCG
Tag25:TAGTAGCG
Tag26:AGATAGCG
Tag27:TGTGAGCG
Tag28:TCACAGCG
Tag29:ACTGTACG
Tag30:TGCGTACG
Tag31:TCGCTACG
Tag32:TACTGACG
Tag33:AGACGACG
Tag34:TGTAGACG
Tag35:ACGAGACG
Tag36:ATATCACG
Tag37:TCAGCACG
Tag38:TAGACACG
Tag39:AGCACACG
Tag40:ATGTGTAG
Tag41:ACTCGTAG
Tag42:TGCAGTAG
Tag43:TGATCTAG
Tag44:TACGCTAG
Tag45:TCGTATAG
Tag46:AGACATAG
Tag47:AGCGTGAG
Tag48:ATGATGAG
Tag49:ACATCGAG
Tag50:TCTGCGAG
Tag51:ATAGAGAG
Tag52:TATCAGAG
Tag53:ACGCAGAG
Tag54:ACAGTCAG
Tag55:TCTATCAG
Tag56:TAGTGCAG
Tag57:TGACGCAG
Tag58:ATCAGCAG
Tag59:TGCTACAG
Tag60:AGTGACAG
Tag61:ACTGTGTC
Tag62:TACATGTC
Tag63:ATGACGTC
Tag64:AGCGAGTC
Tag65:TCGCAGTC
Tag66:ATACAGTC
Tag67:TGCGTCTC
Tag68:TCACTCTC
Tag69:ATCTGCTC
Tag70:TGTAGCTC
Tag71:ACGTACTC
Tag72:TCTGACTC
Tag73:ACGCTATC
Tag74:ATCATATC
Tag75:TCGTGATC
Tag76:TGACGATC
Tag77:TGCTCATC
Tag78:TATGCATC
Tag79:ACAGCATC
Tag80:AGTACATC
Tag81:AGTGCTGC
Tag82:TGCGATGC
Tag83:ATGCATGC
Tag84:TCACATGC
Tag85:AGAGTCGC
Tag86:ACTATCGC
Tag87:TAGATCGC
Tag88:TCATGCGC
Tag89:TACTACGC
Tag90:ATATACGC
Tag91:TGTCACGC
Tag92:AGTCTAGC
Tag93:ATGTGAGC
Tag94:TAGCGAGC
Tag95:ACACGAGC
Tag96:TCTAGAGC
Tag97:AGCAGAGC
Tag98:ATCGCAGC
Tag99:TGAGCAGC
Tag100:ACGACAGC
Tag101:TACACAGC
Tag102:ATACGTAC
Tag103:AGTAGTAC
Tag104:ACGTCTAC
Tag105:TCAGCTAC
Tag106:TATACTAC
Tag107:ATCACTAC
Tag108:AGCTATAC
Tag109:ACTGATAC
Tag110:TGACTGAC
Tag111:TCGATGAC
Tag112:TAGTCGAC
Tag113:AGAGCGAC
Tag114:ACTACGAC
Tag115:TGCACGAC
Tag116:ATGTAGAC
Tag117:TCATAGAC
Tag118:TACGAGAC
Tag119:AGTCAGAC
Tag120:TATGTCAC
Tag121:ATGCTCAC
Tag122:AGCATCAC
Tag123:AGATGCAC
Tag124:TCTCGCAC
Tag125:ACGAGCAC
Tag126:TACAGCAC
Tag127:ATCGACAC
Tag128:TGAGACAC
Tag129:TAGCACAC
Tag130:ACACACAC
[Meyer et al. 2010 6nt]
#
# python create_index_sequences.py -l 6 -d 3
#
Tag1:AACCAG
Tag2:AACGCA
Tag3:AACTGC
Tag4:AAGAAC
Tag5:AAGCCT
Tag6:AAGTTA
Tag7:AATACG
Tag8:AATCGA
Tag9:AATGAT
Tag10:ACCAAT
Tag11:ACCGTC
Tag12:ACCTCG
Tag13:ACGAGG
Tag14:ACTATA
Tag15:ACTTAC
Tag16:AGAAGC
Tag17:AGACCG
Tag18:AGAGTA
Tag19:AGATAT
Tag20:AGCATG
Tag21:AGCCGT
Tag22:AGGCTC
Tag23:AGTTGG
Tag24:ATAACT
Tag25:ATAGAC
Tag26:ATATTG
Tag27:ATGGCG
Tag28:ATTCTT
Tag29:CAAGAG
Tag30:CAATTC
Tag31:CAGATG
Tag32:CAGCAA
Tag33:CAGGCC
Tag34:CATAGC
Tag35:CCAACG
Tag36:CCAGGT
Tag37:CCGCTT
Tag38:CCGTAG
Tag39:CCTGAA
Tag40:CGAATT
Tag41:CGATCA
Tag42:CGCAAC
Tag43:CGCGCT
Tag44:CGTCAG
Tag45:CTAAGA
Tag46:CTCCAT
Tag47:CTCGGC
Tag48:CTGCGG
Tag49:GACCTT
Tag50:GACGAC
Tag51:GATTAG
Tag52:GCATCC
Tag53:GCCAGC
Tag54:GCGACT
Tag55:GCTCAT
Tag56:GGCCAA
Tag57:GGCTTC
Tag58:GGTACC
Tag59:GTAATC
Tag60:GTACGT
Tag61:GTCAAG
Tag62:GTCTCT
Tag63:GTTCCG
Tag64:TACGGT
Tag65:TACTTG
Tag66:TATCTC
Tag67:TCATAA
Tag68:TCCGAG
Tag69:TCGCCG
Tag70:TCTAGT
Tag71:TCTGCC
Tag72:TGGAAG
Tag73:TGGTCC
Tag74:TTATGC
Tag75:TTGATT
[Meyer et al. 2010 7nt]
#
# From supplementary file in Meyer et al. 2010
#
indexing1:TCGCAGG
indexing2:CTCTGCA
indexing3:CCTAGGT
indexing4:GGATCAA
indexing5:GCAAGAT
indexing6:ATGGAGA
indexing7:CTCGATG
indexing8:GCTCGAA
indexing9:ACCAACT
indexing10:CCGGTAC
indexing11:AACTCCG
indexing12:TTGAAGT
indexing13:ACTATCA
indexing14:TTGGATC
indexing15:CGACCTG
indexing16:TAATGCG
indexing17:AGGTACC
indexing18:TGCGTCC
indexing19:GAATCTC
indexing20:CATGCTC
indexing21:ACGCAAC
indexing22:GCATTGG
indexing23:GATCTCG
indexing24:CAATATG
indexing25:TGACGTC
indexing26:GATGCCA
indexing27:CAATTAC
indexing28:AGATAGG
indexing29:CCGATTG
indexing30:ATGCCGC
indexing31:CAGTACT
indexing32:AATAGTA
indexing33:CATCCGG
indexing34:TCATGGT
indexing35:AGAACCG
indexing36:TGGAATA
indexing37:CAGGAGG
indexing38:AATACCT
indexing39:CGAATGC
indexing40:TTCGCAA
indexing41:AATTCAA
indexing42:CGCGCAG
indexing43:AAGGTCT
indexing44:ACTGGAC
indexing45:AGCAGGT
indexing46:GTACCGG
indexing47:GGTCAAG
indexing48:AATGATG
indexing49:AGTCAGA
indexing50:AACTAGA
indexing51:CTATGGC
indexing52:CGACGGT
indexing53:AACCAAG
indexing54:CGGCGTA
indexing55:GCAGTCC
indexing56:CTCGCGC
indexing57:CTGCGAC
indexing58:ACGTATG
indexing59:ATACTGA
indexing60:TACTTAG
indexing61:AAGCTAA
indexing62:GACGGCG
indexing63:AGAAGAC
indexing64:GTCCGGC
indexing65:TCAGCTT
indexing66:AGAGCGC
indexing67:GCCTACG
indexing68:TAATCAT
indexing69:AACCTGC
indexing70:GACGATT
indexing71:TAGGCCG
indexing72:GGCATAG
indexing73:TTCAACC
indexing74:TTAACTC
indexing75:TAGTCTA
indexing76:TGCATGA
indexing77:AATAAGC
indexing78:AGCCTTG
indexing79:CCAACCT
indexing80:GCAGAAG
indexing81:AGAATTA
indexing82:CAGCATC
indexing83:TTCTAGG
indexing84:CCTCTAG
indexing85:CCGGATA
indexing86:GCCGCCT
indexing87:AACGACC
indexing88:CCAGCGG
indexing89:TAGTTCC
indexing90:TGGCAAT
indexing91:CGTATAT
indexing92:GCTAATC
indexing93:GACTTCT
indexing94:GTACTAT
indexing95:CGAGATC
indexing96:CGCAGCC
indexing97:GAGAGGC
indexing98:GCTTCAG
indexing99:ATATCCA
indexing100:GTTATAC
indexing101:CCTTAAT
indexing102:CGCCAAC
indexing103:TACTCGC
indexing104:AGCGCCA
indexing105:TAAGTAA
indexing106:TTGGTCA
indexing107:GTTGCAT
indexing108:ATCCTCT
indexing109:GGCGGTC
indexing110:ATATGAT
indexing111:GGTACGC
indexing112:AAGAACG
indexing113:CCGTTGA
indexing114:AGCAATC
indexing115:GCTCCGT
indexing116:CAACTCT
indexing117:AGACTCC
indexing118:CTATCTT
indexing119:AAGCAGT
indexing120:GTTACCG
indexing121:CCTAACG
indexing122:ATCATAA
indexing123:TGATAAC
indexing124:TCTCCTA
indexing125:CAGAGCA
indexing126:CGGCTGG
indexing127:CGCTATT
indexing128:GATCGTC
indexing129:ACGGCAG
indexing130:GACCGAT
indexing131:ACTTGCG
indexing132:GTAAGCC
indexing133:GCCATGC
indexing134:ATAACGT
indexing135:CGGACGT
indexing136:GCGAGTA
indexing137:ACGCGGA
indexing138:GTCTAAT
indexing139:GAAGCGT
indexing140:CGGTAAG
indexing141:GGTAACT
indexing142:AATATAG
indexing143:CCTCGCC
indexing144:TTAATAG
indexing145:CCGAAGC
indexing146:TCGTTAT
indexing147:GGCTCTG
indexing148:CCAAGTC
indexing149:CTTGGAA
indexing150:TGAAGCT
indexing151:GGTTGAC
indexing152:CCGCCAT
indexing153:ACCAGAG
indexing154:GCTGAGA
indexing155:CCTTCGC
indexing156:CTGGCCT
indexing157:CGCAAGG
indexing158:TGAGAGA
indexing159:AAGATTC
indexing160:ATCGGTT
indexing161:ACGAGCC
indexing162:TGGATAC
indexing163:ATTCCAG
indexing164:ACTCATT
indexing165:ACCTCGT
indexing166:AGCTTAT
indexing167:GCGATCT
indexing168:CTCCAGT
indexing169:GAACTTA
indexing170:CCAATAA
indexing171:AGGCGAG
indexing172:CTCAGAT
indexing173:AAGACGA
indexing174:ACCGCTC
indexing175:AACTGAC
indexing176:GCAACTG
indexing177:GAGTAAC
indexing178:GATTAGG
indexing179:AGTCGCT
indexing180:CATAGAC
indexing181:ACTACGG
indexing182:GGCTAGC
indexing183:CCATGAG
indexing184:GCTGGTT
indexing185:AGAGTAG
indexing186:TATCAAC
indexing187:ATACGCG
indexing188:GACGTAC
indexing189:CTACTTC
indexing190:TGGTCGG
indexing191:AGACCAT
indexing192:TCCGAAC
indexing193:GAGGTTG
indexing194:TATGAGT
indexing195:CTTCGTT
indexing196:CCGTCCG
indexing197:AACGTTA
indexing198:GCATATT
indexing199:ACCTTCC
indexing200:TTCCGAG
indexing201:AACCGCA
indexing202:AGTCCTC
indexing203:ACGACTT
indexing204:ATCCATA
indexing205:CGGTCTC
indexing206:CTCATCG
indexing207:TCGCGTT
indexing208:CTTGACC
indexing209:ATAGCTG
indexing210:CGTTCCT
indexing211:CGCCTCA
indexing212:CAATCGA
indexing213:ACGCTCG
indexing214:CAGGCAA
indexing215:AGAGACT
indexing216:AATTGGT
indexing217:CAAGAAT
indexing218:AAGAGAT
indexing219:CTGACTA
indexing220:AAGCCTG
indexing221:CAACGAA
indexing222:CCATACC
indexing223:AAGTTGG
indexing224:ACCGAGG
indexing225:AACGCAT
indexing226:ATAGAAC
indexing227:CAAGGCC
indexing228:CGATTCG
[Meyer et al. 2010 8nt]
#
# python create_index_sequences.py -l 8 -d 3
#
Tag1:AACCAACG
Tag2:AACCAGAA
Tag3:AACCATGC
Tag4:AACCGAAC
Tag5:AACCGCCA
Tag6:AACCGGTT
Tag7:AACCTAGA
Tag8:AACCTCAG
Tag9:AACCTGCC
Tag10:AACGAAGT
Tag11:AACGACTA
Tag12:AACGATAG
Tag13:AACGCATC
Tag14:AACGCCAT
Tag15:AACGCGCA
Tag16:AACGGCGC
Tag17:AACGGTCT
Tag18:AACTACCT
Tag19:AACTAGTC
Tag20:AACTCAAG
Tag21:AACTCCGA
Tag22:AACTCTCC
Tag23:AACTGATA
Tag24:AACTGGCG
Tag25:AACTTGAT
Tag26:AAGAACCA
Tag27:AAGAAGAC
Tag28:AAGAATGG
Tag29:AAGACCAG
Tag30:AAGACGCT
Tag31:AAGACTTA
Tag32:AAGAGAAT
Tag33:AAGAGCTC
Tag34:AAGATACC
Tag35:AAGATCGT
Tag36:AAGCAATA
Tag37:AAGCAGGT
Tag38:AAGCCAGC
Tag39:AAGCCTAT
Tag40:AAGCGCGG
Tag41:AAGCGTCC
Tag42:AAGGAGCG
Tag43:AAGGATTC
Tag44:AAGGTAAG
Tag45:AAGGTTCA
Tag46:AAGTACGC
Tag47:AAGTATAA
Tag48:AAGTCATT
Tag49:AAGTTCCG
Tag50:AAGTTGGA
Tag51:AATAACTG
Tag52:AATAAGGA
Tag53:AATAATCC
Tag54:AATACCGC
Tag55:AATAGACG
Tag56:AATAGCAA
Tag57:AATATGAG
Tag58:AATCCATG
Tag59:AATCCGAC
Tag60:AATCCTCA
Tag61:AATCGAGT
Tag62:AATCGTAG
Tag63:AATCTCCT
Tag64:AATGAGAT
Tag65:AATGCAGA
Tag66:AATGGCTT
Tag67:AATTCGGT
Tag68:ACCAACCG
Tag69:ACCAAGAT
Tag70:ACCAATTA
Tag71:ACCAGACC
Tag72:ACCAGCGT
Tag73:ACCAGTAG
Tag74:ACCATAGG
Tag75:ACCATCAA
Tag76:ACCATTCT
Tag77:ACCGAATG
Tag78:ACCGAGCC
Tag79:ACCGCCGG
Tag80:ACCGCGTT
Tag81:ACCGCTAC
Tag82:ACCGGAAT
Tag83:ACCGTCTC
Tag84:ACCGTTGA
Tag85:ACCTAAGC
Tag86:ACCTCTTG
Tag87:ACCTGGAC
Tag88:ACCTTATT
Tag89:ACGAACTT
Tag90:ACGACCGA
Tag91:ACGACGTC
Tag92:ACGACTCG
Tag93:ACGAGATG
Tag94:ACGAGGAA
Tag95:ACGATTAC
Tag96:ACGCAACC
Tag97:ACGCAGAG
Tag98:ACGCGAGA
Tag99:ACGCGCCT
Tag100:ACGCTAAT
Tag101:ACGCTCGC
Tag102:ACGCTGCA
Tag103:ACGGAGGA
Tag104:ACGGATAT
Tag105:ACGGCAGT
Tag106:ACGTAGCT
Tag107:ACGTCAAC
Tag108:ACTACCAT
Tag109:ACTAGGCT
Tag110:ACTAGTTC
Tag111:ACTATATA
Tag112:ACTATGGC
Tag113:ACTCAATT
Tag114:ACTCATAC
Tag115:ACTCCGCG
Tag116:ACTCGCTA
Tag117:ACTCTTGG
Tag118:ACTGACCA
Tag119:ACTGCAAG
Tag120:ACTGCTCT
Tag121:ACTGGAGC
Tag122:ACTTAACG
Tag123:ACTTACGT
Tag124:ACTTAGTA
Tag125:ACTTCCTC
Tag126:ACTTCTAA
Tag127:ACTTGCAG
Tag128:AGAACCGG
Tag129:AGAACGAC
Tag130:AGAACTCT
Tag131:AGAAGAGC
Tag132:AGAAGCAT
Tag133:AGAAGGCG
Tag134:AGAAGTTA
Tag135:AGAATAAG
Tag136:AGAATCTC
Tag137:AGACCAAT
Tag138:AGACCTGC
Tag139:AGACGATG
Tag140:AGACGGAA
Tag141:AGACTACC
Tag142:AGACTCGT
Tag143:AGAGAACG
Tag144:AGAGACGC
Tag145:AGAGAGTT
Tag146:AGAGATAA
Tag147:AGAGCCTA
Tag148:AGAGGTCC
Tag149:AGAGTAGA
Tag150:AGATAAGT
Tag151:AGATACTG
Tag152:AGATAGCC
Tag153:AGATCATC
Tag154:AGATCTAG
Tag155:AGATGCGA
Tag156:AGCAAGGC
Tag157:AGCAGATT
Tag158:AGCCAATC
Tag159:AGCCATAT
Tag160:AGCCGTCG
Tag161:AGCGGCAA
Tag162:AGCGTAAC
Tag163:AGCTAGAG
Tag164:AGCTATCA
Tag165:AGCTCCTT
Tag166:AGCTGAGG
Tag167:AGCTTCGC
Tag168:AGGATGAT
Tag169:AGGCAAGG
Tag170:AGGCCGCC
Tag171:AGGCCTTG
Tag172:AGGCTCTA
Tag173:AGGCTTCT
Tag174:AGGTCGAA
Tag175:AGGTTATG
Tag176:AGTAACCT
Tag177:AGTAATAG
Tag178:AGTACGTT
Tag179:AGTACTGA
Tag180:AGTATAGT
Tag181:AGTCGCGC
Tag182:AGTCTGGA
Tag183:AGTTATGC
Tag184:AGTTGAAC
Tag185:ATAACCTT
Tag186:ATAAGACT
Tag187:ATAAGGTC
Tag188:ATAATGGT
Tag189:ATAATTCC
Tag190:ATACCAGG
Tag191:ATACCTAA
Tag192:ATACGCAG
Tag193:ATACTATA
Tag194:ATACTGAC
Tag195:ATAGAATC
Tag196:ATAGACCT
Tag197:ATAGAGAG
Tag198:ATAGCGCC
Tag199:ATAGCTTG
Tag200:ATAGGTAT
Tag201:ATAGTCAA
Tag202:ATATAGGA
Tag203:ATATATAC
Tag204:ATATCCGC
Tag205:ATATCGAT
Tag206:ATATTACG
Tag207:ATCAACTC
Tag208:ATCAAGCA
Tag209:ATCAGAGA
Tag210:ATCATAAT
Tag211:ATCCATTG
Tag212:ATCCTCTT
Tag213:ATCCTTCA
Tag214:ATCGGACG
Tag215:ATCGGTTC
Tag216:ATCTACGG
Tag217:ATCTCAGT
Tag218:ATCTGCAT
Tag219:ATGAATCT
Tag220:ATGACTGC
Tag221:ATGAGCCG
Tag222:ATGCAGTC
Tag223:ATGCCGGA
Tag224:ATGCGATT
Tag225:ATGCTTAG
Tag226:ATGGACTG
Tag227:ATGGTACT
Tag228:ATTACGAA
Tag229:ATTATCGA
Tag230:ATTCAGCT
Tag231:ATTCGACC
Tag232:ATTGAAGG
Tag233:ATTGATTA
Tag234:ATTGCATT
Tag235:CAACCATC
Tag236:CAACCTCT
Tag237:CAACGAGG
Tag238:CAACGCAA
Tag239:CAACTCTT
Tag240:CAACTGCA
Tag241:CAACTTAC
Tag242:CAAGACGA
Tag243:CAAGAGAC
Tag244:CAAGATTG
Tag245:CAAGCGGT
Tag246:CAAGCTAA
Tag247:CAAGGCCG
Tag248:CAAGTACT
Tag249:CAATAATA
Tag250:CAATATCC
Tag251:CAATCCGG
Tag252:CAATGAAC
Tag253:CAATGGTT
Tag254:CAATTGAG
Tag255:CAGAATAT
Tag256:CAGACCTT
Tag257:CAGACTCC
Tag258:CAGAGAGC
Tag259:CAGATATG
Tag260:CAGATCAA
Tag261:CAGCAACT
Tag262:CAGCATGA
Tag263:CAGCCAAG
Tag264:CAGCCGTA
Tag265:CAGCGGAC
Tag266:CAGGAAGG
Tag267:CAGGTCTC
Tag268:CAGTCAGA
Tag269:CAGTCGAT
Tag270:CAGTTGCC
Tag271:CATAACGT
Tag272:CATAAGCG
Tag273:CATAATTA
Tag274:CATACGTC
Tag275:CATACTGG
Tag276:CATAGGAT
Tag277:CATATAAC
Tag278:CATATTCT
Tag279:CATCAGTT
Tag280:CATCGCTC
Tag281:CATCTATA
Tag282:CATCTCGG
Tag283:CATGATGC
Tag284:CATGGAAG
Tag285:CATTAGAA
Tag286:CATTCTAC
Tag287:CATTGCCA
Tag288:CCAACCAG
Tag289:CCAACGTT
Tag290:CCAAGAGT
Tag291:CCAAGGAC
Tag292:CCAAGTCA
Tag293:CCAATACC
Tag294:CCAATGGA
Tag295:CCAGAAGC
Tag296:CCAGAGCG
Tag297:CCAGCCTC
Tag298:CCAGCTGG
Tag299:CCAGGCAT
Tag300:CCATACCT
Tag301:CCATAGTC
Tag302:CCATATAG
Tag303:CCATCTTA
Tag304:CCATGCGC
Tag305:CCATTATG
Tag306:CCGAACGC
Tag307:CCGAATTG
Tag308:CCGAGGCG
Tag309:CCGATCCT
Tag310:CCGCCATT
Tag311:CCGCCTAA
Tag312:CCGCGCAG
Tag313:CCGCTAGG
Tag314:CCGCTTCC
Tag315:CCGGAGTT
Tag316:CCGGCGAC
Tag317:CCGGTTAG
Tag318:CCGTAAGT
Tag319:CCGTACTA
Tag320:CCGTCTGC
Tag321:CCTAGCGA
Tag322:CCTATCTC
Tag323:CCTCAGCC
Tag324:CCTCCAAC
Tag325:CCTCCGGT
Tag326:CCTCCTTG
Tag327:CCTCGACG
Tag328:CCTCGGAA
Tag329:CCTCTCAT
Tag330:CCTGAACT
Tag331:CCTGACGG
Tag332:CCTGCCAA
Tag333:CCTGGTAC
Tag334:CCTTCAGG
Tag335:CCTTGAAT
Tag336:CGAAGCTG
Tag337:CGAATATT
Tag338:CGAATCCA
Tag339:CGACCGCG
Tag340:CGACGCCT
Tag341:CGACGGTC
Tag342:CGACGTAG
Tag343:CGAGATCT
Tag344:CGAGCAAC
Tag345:CGAGTCGG
Tag346:CGATAGAT
Tag347:CGATCGGA
Tag348:CGATGACG
Tag349:CGATTAGC
Tag350:CGCAACGG
Tag351:CGCAAGCT
Tag352:CGCAATAC
Tag353:CGCAGAAG
Tag354:CGCATCAT
Tag355:CGCATTCG
Tag356:CGCCAAGT
Tag357:CGCCGACC
Tag358:CGCCGCTA
Tag359:CGCCGGAT
Tag360:CGCCTATG
Tag361:CGCCTGGC
Tag362:CGCGACTC
Tag363:CGCGCATT
Tag364:CGCGCCAG
Tag365:CGCGCTCA
Tag366:CGCGGCGT
Tag367:CGCGGTTG
Tag368:CGCTCGAC
Tag369:CGCTCTGG
Tag370:CGCTTACT
Tag371:CGGAAGAG
Tag372:CGGAATCA
Tag373:CGGACGGC
Tag374:CGGAGACT
Tag375:CGGCATTC
Tag376:CGGCTAAC
Tag377:CGGCTCCG
Tag378:CGGTAACC
Tag379:CGGTCCGT
Tag380:CGTAGATC
Tag381:CGTAGGCA
Tag382:CGTATTGC
Tag383:CGTCATAA
Tag384:CGTCCAGA
Tag385:CGTCCTCC
Tag386:CGTCTGAG
Tag387:CGTTAATG
Tag388:CGTTCGCT
Tag389:CGTTGCGG
Tag390:CTAACTAC
Tag391:CTAATAGG
Tag392:CTACCGGC
Tag393:CTACGAAT
Tag394:CTACGTCC
Tag395:CTAGGAGA
Tag396:CTAGTTGC
Tag397:CTATCAAG
Tag398:CTATTCAT
Tag399:CTCAGCGC
Tag400:CTCAGGAA
Tag401:CTCAGTCT
Tag402:CTCATATC
Tag403:CTCCAGAC
Tag404:CTCCGCCG
Tag405:CTCCTGCT
Tag406:CTCGAACC
Tag407:CTCGAGGT
Tag408:CTCGCAGG
Tag409:CTCGCGTA
Tag410:CTCGTCCA
Tag411:CTCGTTAT
Tag412:CTCTAAGA
Tag413:CTCTACTT
Tag414:CTCTATCG
Tag415:CTCTCCAA
Tag416:CTCTGATG
Tag417:CTCTGGCC
Tag418:CTGAAGCC
Tag419:CTGACCGG
Tag420:CTGAGCAT
Tag421:CTGAGTTC
Tag422:CTGATTGA
Tag423:CTGCAATG
Tag424:CTGCCTCG
Tag425:CTGCTCGT
Tag426:CTGCTGAA
Tag427:CTGGATAA
Tag428:CTGGCAAT
Tag429:CTTATCAG
Tag430:CTTCATGG
Tag431:CTTCCTAT
Tag432:CTTCGTTA
Tag433:CTTCTAGC
Tag434:CTTGAGTC
Tag435:CTTGCCGC
Tag436:CTTGCGAG
Tag437:CTTGGCCT
Tag438:GAACCGTT
Tag439:GAACGCTG
Tag440:GAACGTAT
Tag441:GAACTAAG
Tag442:GAAGCAGC
Tag443:GAAGCTCG
Tag444:GAAGTCGT
Tag445:GAATAGGC
Tag446:GAATCATG
Tag447:GAATGAGT
Tag448:GAATTACC
Tag449:GACCAGCT
Tag450:GACCGGAG
Tag451:GACCTCGC
Tag452:GACCTTAA
Tag453:GACGATCC
Tag454:GACGGATT
Tag455:GACGTACG
Tag456:GACTATTG
Tag457:GACTGCGG
Tag458:GAGAGGCC
Tag459:GAGATTGC
Tag460:GAGCATAC
Tag461:GAGCCGCG
Tag462:GAGCTAGT
Tag463:GAGGACCT
Tag464:GAGGAGTA
Tag465:GAGGCCAA
Tag466:GAGTAACG
Tag467:GAGTCGTC
Tag468:GAGTTATA
Tag469:GAGTTCAT
Tag470:GATAGTAC
Tag471:GATATATT
Tag472:GATCCAAT
Tag473:GATCTTCC
Tag474:GATGAATG
Tag475:GATGATAA
Tag476:GATGCCTC
Tag477:GATGCGCT
Tag478:GATGGACC
Tag479:GATTACTT
Tag480:GATTCCAG
Tag481:GATTCTTA
Tag482:GCAACTAA
Tag483:GCAAGATC
Tag484:GCAAGCCT
Tag485:GCAATCGC
Tag486:GCAATGAG
Tag487:GCAGACTG
Tag488:GCAGAGAT
Tag489:GCAGGAGG
Tag490:GCAGTAAC
Tag491:GCAGTCCA
Tag492:GCATCCTT
Tag493:GCATCGAC
Tag494:GCATGCAA
Tag495:GCATGGCG
Tag496:GCATTGGT
Tag497:GCCAGGTT
Tag498:GCCATGCC
Tag499:GCCGACGC
Tag500:GCCGCAGA
Tag501:GCCGGCAG
Tag502:GCCTAACT
Tag503:GCCTATAC
Tag504:GCCTCATC
Tag505:GCCTTAAG
Tag506:GCGAAGCA
Tag507:GCGACCTG
Tag508:GCGACGAT
Tag509:GCGATACG
Tag510:GCGCATCG
Tag511:GCGCCTTC
Tag512:GCGCGAAC
Tag513:GCGCGGTA
Tag514:GCGCTCTT
Tag515:GCGGTTCT
Tag516:GCGTACGG
Tag517:GCGTTAGC
Tag518:GCTAAGAC
Tag519:GCTAATCT
Tag520:GCTACGTA
Tag521:GCTCAAGG
Tag522:GCTCTGCT
Tag523:GCTGCGGC
Tag524:GCTGGTCA
Tag525:GCTTCCGA
Tag526:GCTTCTCC
Tag527:GCTTGATG
Tag528:GGAACGGT
Tag529:GGAACTTC
Tag530:GGAATTGG
Tag531:GGAGCCAT
Tag532:GGAGCGCA
Tag533:GGAGGCTC
Tag534:GGAGTATG
Tag535:GGATATCG
Tag536:GGATTAAT
Tag537:GGCAGCCG
Tag538:GGCAGGAC
Tag539:GGCATAGA
Tag540:GGCCAGTA
Tag541:GGCCATGG
Tag542:GGCCGTTC
Tag543:GGCCTCCT
Tag544:GGCGAGCG
Tag545:GGCGCGTC
Tag546:GGCGGTAT
Tag547:GGCGTTGC
Tag548:GGCTCTCT
Tag549:GGCTTGAA
Tag550:GGTAACGC
Tag551:GGTACCAA
Tag552:GGTACGCC
Tag553:GGTAGAAT
Tag554:GGTAGTTG
Tag555:GGTCAACC
Tag556:GGTCAGAT
Tag557:GGTCCTAG
Tag558:GGTCGCTT
Tag559:GGTCGGCG
Tag560:GGTTAGTC
Tag561:GGTTCAGC
Tag562:GTAAGAAG
Tag563:GTAATCCG
Tag564:GTAATTAT
Tag565:GTACCGAG
Tag566:GTACGAGC
Tag567:GTACGGCT
Tag568:GTACTCGA
Tag569:GTAGAAGT
Tag570:GTAGCCGG
Tag571:GTATACCA
Tag572:GTATCTGA
Tag573:GTATTCTC
Tag574:GTCAACGT
Tag575:GTCAAGAG
Tag576:GTCATCTA
Tag577:GTCCGCAA
Tag578:GTCCTAAC
Tag579:GTCGCCTT
Tag580:GTCGCTAG
Tag581:GTCTCGCG
Tag582:GTCTTGGC
Tag583:GTTAAGTT
Tag584:GTTAGCGG
Tag585:GTTCAATA
Tag586:GTTCAGGC
Tag587:GTTCTACG
Tag588:GTTGACCG
Tag589:GTTGCAAC
Tag590:TAACGTCG
Tag591:TAACTAGC
Tag592:TAAGATAT
Tag593:TAAGCCTG
Tag594:TAATACGT
Tag595:TAATCGCG
Tag596:TAATCTGC
Tag597:TACCGCAT
Tag598:TACCTACT
Tag599:TACCTTGG
Tag600:TACGAGTT
Tag601:TACGCTTA
Tag602:TACGGTAC
Tag603:TACTTATC
Tag604:TAGCAGCC
Tag605:TAGCATTG
Tag606:TAGGCAAC
Tag607:TAGGCCGT
Tag608:TAGTAGAG
Tag609:TAGTATCT
Tag610:TAGTTAGG
Tag611:TATATCAT
Tag612:TATATGCC
Tag613:TATATTGA
Tag614:TATCGGCT
Tag615:TATGCTAG
Tag616:TATTAACC
Tag617:TATTGCGC
Tag618:TCAACTTG
Tag619:TCAAGTAT
Tag620:TCAATGCT
Tag621:TCAGATTC
Tag622:TCAGCGAG
Tag623:TCAGGACC
Tag624:TCAGGCGA
Tag625:TCAGTAGT
Tag626:TCAGTTAA
Tag627:TCATGAAG
Tag628:TCATTCCG
Tag629:TCCAGCTC
Tag630:TCCATAAC
Tag631:TCCGACCT
Tag632:TCCGCTCG
Tag633:TCCGTATA
Tag634:TCCTACTG
Tag635:TCCTAGGT
Tag636:TCCTCAAT
Tag637:TCCTCCGC
Tag638:TCCTGAGA
Tag639:TCCTTGCA
Tag640:TCGAATAA
Tag641:TCGATATT
Tag642:TCGCATGC
Tag643:TCGCGGAT
Tag644:TCGGAACG
Tag645:TCGGTCAT
Tag646:TCGTCGCC
Tag647:TCGTTCGA
Tag648:TCTACTAC
Tag649:TCTAGAGG
Tag650:TCTATTCG
Tag651:TCTCCGTC
Tag652:TCTCTACC
Tag653:TCTCTCTG
Tag654:TCTGCCTT
Tag655:TCTTATAT
Tag656:TCTTGCCT
Tag657:TGAAGGTT
Tag658:TGAATGGC
Tag659:TGACGAAC
Tag660:TGACGCGG
Tag661:TGACTCAA
Tag662:TGAGAGGA
Tag663:TGAGCAGG
Tag664:TGAGTCCT
Tag665:TGATCTCA
Tag666:TGCAAGAA
Tag667:TGCAATTG
Tag668:TGCAGCGA
Tag669:TGCCATCC
Tag670:TGCCTCTC
Tag671:TGCCTGCG
Tag672:TGCGGACT
Tag673:TGCTAACG
Tag674:TGCTCTTC
Tag675:TGGAACCG
Tag676:TGGAAGGT
Tag677:TGGACCAT
Tag678:TGGACGCA
Tag679:TGGAGTAC
Tag680:TGGCCATC
Tag681:TGGCCGAG
Tag682:TGGCGACG
Tag683:TGGCGTTA
Tag684:TGGTAATT
Tag685:TGGTATGA
Tag686:TGGTCCTG
Tag687:TGGTTGAC
Tag688:TTAACCAA
Tag689:TTAAGCGT
Tag690:TTACCATT
Tag691:TTACTTCT
Tag692:TTAGATCG
Tag693:TTAGGATG
Tag694:TTATAACT
Tag695:TTATCGTC
Tag696:TTCAGCAG
Tag697:TTCATACG
Tag698:TTCCAAGC
Tag699:TTCCGGTC
Tag700:TTCGATGA
Tag701:TTCGCGAC
Tag702:TTCGTCGG
Tag703:TTCTGAAC
Tag704:TTGACTAG
Tag705:TTGAGACC
Tag706:TTGATCCA
Tag707:TTGCATAT
Tag708:TTGCGCGC
Tag709:TTGGAGCT
Tag710:TTGGCAGA
Tag711:TTGGCTCC
[Illumina TruSeq RNA DNA]
IDX1:ATCACG
IDX2:CGATGT
IDX3:TTAGGC
IDX4:TGACCA
IDX5:ACAGTG
IDX6:GCCAAT
IDX7:CAGATC
IDX8:ACTTGA
IDX9:GATCAG
IDX10:TAGCTT
IDX11:GGCTAC
IDX12:CTTGTA
IDX13:AGTCAA
IDX14:AGTTCC
IDX15:ATGTCA
IDX16:CCGTCC
IDX17:GTAGAG
IDX18:GTCCGC
IDX19:GTGAAA
IDX20:GTGGCC
IDX21:GTTTCG
IDX22:CGTACG
IDX23:GAGTGG
IDX24:GGTAGC
IDX25:ACTGAT
IDX26:ATGAGC
IDX27:ATTCCT
[Illumina TruSeq RNA DNA non-blessed]
IDX1:ATCACG
IDX2:CGATGT
IDX3:TTAGGC
IDX4:TGACCA
IDX5:ACAGTG
IDX6:GCCAAT
IDX7:CAGATC
IDX8:ACTTGA
IDX9:GATCAG
IDX10:TAGCTT
IDX11:GGCTAC
IDX12:CTTGTA
IDX13:AGTCAA
IDX14:AGTTCC
IDX15:ATGTCA
IDX16:CCGTCC
IDX17:GTAGAG
IDX18:GTCCGC
IDX19:GTGAAA
IDX20:GTGGCC
IDX21:GTTTCG
IDX22:CGTACG
IDX23:GAGTGG
IDX24:GGTAGC
IDX25:ACTGAT
IDX26:ATGAGC
IDX27:ATTCCT
IDX28:CAAAAG
IDX29:CAACTA
IDX30:CACCGG
IDX31:CACGAT
IDX32:CACTCA
IDX33:CAGGCG
IDX34:CATGGC
IDX35:CATTTT
IDX36:CCAACA
IDX37:CGGAAT
IDX38:CTAGCT
IDX39:CTATAC
IDX40:CTCAGA
IDX41:GACGAC
IDX42:TAATCG
IDX43:TACAGC
IDX44:TATAAT
IDX45:TCATTC
IDX46:TCCCGA
IDX47:TCGAAG
IDX48:TCGGCA
[Illumina small RNA]
IDX1:CGTGAT
IDX2:ACATCG
IDX3:GCCTAA
IDX4:TGGTCA
IDX5:CACTGT
IDX6:ATTGGC
IDX7:GATCTG
IDX8:TCAAGT
IDX9:CTGATC
IDX10:AAGCTA
IDX11:GTAGCC
IDX12:TACAAG
IDX13:TTGACT
IDX14:GGAACT
IDX15:TGACAT
IDX16:GGACGG
IDX17:CTCTAC
IDX18:GCGGAC
IDX19:TTTCAC
IDX20:GGCCAC
IDX21:CGAAAC
IDX22:CGTACG
IDX23:CCACTC
IDX24:GCTACC
IDX25:ATCAGT
IDX26:GCTCAT
IDX27:AGGAAT
IDX28:CTTTTG
IDX29:TAGTTG
IDX30:CCGGTG
IDX31:ATCGTG
IDX32:TGAGTG
IDX33:CGCCTG
IDX34:GCCATG
IDX35:AAAATG
IDX36:TGTTGG
IDX37:ATTCCG
IDX38:AGCTAG
IDX39:GTATAG
IDX40:TCTGAG
IDX41:GTCGTC
IDX42:CGATTA
IDX43:GCTGTA
IDX44:ATTATA
IDX45:GAATGA
IDX46:TCGGGA
IDX47:CTTCGA
IDX48:TGCCGA
[Illumina Nextera DNA i5]
N501:TAGATCGC
N502:CTCTCTAT
N503:TATCCTCT
N504:AGAGTAGA
N505:GTAAGGAG
N506:ACTGCATA
N507:AAGGAGTA
N508:CTAAGCCT
[Illumina Nextera DNA i7]
N701:TAAGGCGA
N702:CGTACTAG
N703:AGGCAGAA
N704:TCCTGAGC
N705:GGACTCCT
N706:TAGGCATG
N707:CTCTCTAC
N708:CAGAGAGG
N709:GCTACGCT
N710:CGAGGCTG
N711:AAGAGGCA
N712:GTAGAGGA
[Illumina Nextera DNA Both i5 and i7]
N501:TAGATCGC
N502:CTCTCTAT
N503:TATCCTCT
N504:AGAGTAGA
N505:GTAAGGAG
N506:ACTGCATA
N507:AAGGAGTA
N508:CTAAGCCT
N701:TAAGGCGA
N702:CGTACTAG
N703:AGGCAGAA
N704:TCCTGAGC
N705:GGACTCCT
N706:TAGGCATG
N707:CTCTCTAC
N708:CAGAGAGG
N709:GCTACGCT
N710:CGAGGCTG
N711:AAGAGGCA
N712:GTAGAGGA
[Roche MID Extended]
#
# These are the original (non-RL) MIDs
#
MID-1:ACGAGTGCGT
MID-2:ACGCTCGACA
MID-3:AGACGCACTC
MID-4:AGCACTGTAG
MID-5:ATCAGACACG
MID-6:ATATCGCGAG
MID-7:CGTGTCTCTA
MID-8:CTCGCGTGTC
MID-10:TCTCTATGCG
MID-11:TGATACGTCT
MID-13:CATAGTAGTG
MID-14:CGAGAGATAC
MID-15:ATACGACGTA
MID-16:TCACGTACTA
MID-17:CGTCTAGTAC
MID-18:TCTACGTAGC
MID-19:TGTACTACTC
MID-20:ACGACTACAG
MID-21:CGTAGACTAG
MID-22:TACGAGTATG
MID-23:TACTCTCGTG
MID-24:TAGAGACGAG
MID-25:TCGTCGCTCG
MID-26:ACATACGCGT
MID-27:ACGCGAGTAT
MID-28:ACTACTATGT
MID-29:ACTGTACAGT
MID-30:AGACTATACT
MID-31:AGCGTCGTCT
MID-32:AGTACGCTAT
MID-33:ATAGAGTACT
MID-34:CACGCTACGT
MID-35:CAGTAGACGT
MID-36:CGACGTGACT
MID-37:TACACACACT
MID-38:TACACGTGAT
MID-39:TACAGATCGT
MID-40:TACGCTGTCT
MID-41:TAGTGTAGAT
MID-42:TCGATCACGT
MID-43:TCGCACTAGT
MID-44:TCTAGCGACT
MID-45:TCTATACTAT
MID-46:TGACGTATGT
MID-47:TGTGAGTAGT
MID-48:ACAGTATATA
MID-49:ACGCGATCGA
MID-50:ACTAGCAGTA
MID-51:AGCTCACGTA
MID-52:AGTATACATA
MID-53:AGTCGAGAGA
MID-54:AGTGCTACGA
MID-55:CGATCGTATA
MID-56:CGCAGTACGA
MID-57:CGCGTATACA
MID-58:CGTACAGTCA
MID-59:CGTACTCAGA
MID-60:CTACGCTCTA
MID-61:CTATAGCGTA
MID-62:TACGTCATCA
MID-63:TAGTCGCATA
MID-64:TATATATACA
MID-65:TATGCTAGTA
MID-66:TCACGCGAGA
MID-67:TCGATAGTGA
MID-68:TCGCTGCGTA
MID-69:TCTGACGTCA
MID-70:TGAGTCAGTA
MID-71:TGTAGTGTGA
MID-72:TGTCACACGA
MID-73:TGTCGTCGCA
MID-74:ACACATACGC
MID-75:ACAGTCGTGC
MID-76:ACATGACGAC
MID-77:ACGACAGCTC
MID-78:ACGTCTCATC
MID-79:ACTCATCTAC
MID-80:ACTCGCGCAC
MID-81:AGAGCGTCAC
MID-82:AGCGACTAGC
MID-83:AGTAGTGATC
MID-84:AGTGACACAC
MID-85:AGTGTATGTC
MID-86:ATAGATAGAC
MID-87:ATATAGTCGC
MID-88:ATCTACTGAC
MID-89:CACGTAGATC
MID-90:CACGTGTCGC
MID-91:CATACTCTAC
MID-92:CGACACTATC
MID-93:CGAGACGCGC
MID-94:CGTATGCGAC
MID-95:CGTCGATCTC
MID-96:CTACGACTGC
MID-97:CTAGTCACTC
MID-98:CTCTACGCTC
MID-99:CTGTACATAC
MID-100:TAGACTGCAC
MID-101:TAGCGCGCGC
MID-102:TAGCTCTATC
MID-103:TATAGACATC
MID-104:TATGATACGC
MID-105:TCACTCATAC
MID-106:TCATCGAGTC
MID-107:TCGAGCTCTC
MID-108:TCGCAGACAC
MID-109:TCTGTCTCGC
MID-110:TGAGTGACGC
MID-111:TGATGTGTAC
MID-112:TGCTATAGAC
MID-113:TGCTCGCTAC
MID-114:ACGTGCAGCG
MID-115:ACTCACAGAG
MID-116:AGACTCAGCG
MID-117:AGAGAGTGTG
MID-118:AGCTATCGCG
MID-119:AGTCTGACTG
MID-120:AGTGAGCTCG
MID-121:ATAGCTCTCG
MID-122:ATCACGTGCG
MID-123:ATCGTAGCAG
MID-124:ATCGTCTGTG
MID-125:ATGTACGATG
MID-126:ATGTGTCTAG
MID-127:CACACGATAG
MID-128:CACTCGCACG
MID-129:CAGACGTCTG
MID-130:CAGTACTGCG
MID-131:CGACAGCGAG
MID-132:CGATCTGTCG
MID-133:CGCGTGCTAG
MID-134:CGCTCGAGTG
MID-135:CGTGATGACG
MID-136:CTATGTACAG
MID-137:CTCGATATAG
MID-138:CTCGCACGCG
MID-139:CTGCGTCACG
MID-140:CTGTGCGTCG
MID-141:TAGCATACTG
MID-142:TATACATGTG
MID-143:TATCACTCAG
MID-144:TATCTGATAG
MID-145:TCGTGACATG
MID-146:TCTGATCGAG
MID-147:TGACATCTCG
MID-148:TGAGCTAGAG
MID-149:TGATAGAGCG
MID-150:TGCGTGTGCG
MID-151:TGCTAGTCAG
MID-152:TGTATCACAG
MID-153:TGTGCGCGTG
[Roche RL-MID Extended]
#
# These are the RL-MIDs
#
RL1:ACACGACGACT
RL2:ACACGTAGTAT
RL3:ACACTACTCGT
RL4:ACGACACGTAT
RL5:ACGAGTAGACT
RL6:ACGCGTCTAGT
RL7:ACGTACACACT
RL8:ACGTACTGTGT
RL9:ACGTAGATCGT
RL10:ACTACGTCTCT
RL11:ACTATACGAGT
RL12:ACTCGCGTCGT
RL13:AGACTCGACGT
RL14:AGTACGAGAGT
RL15:AGTACTACTAT
RL16:AGTAGACGTCT
RL17:AGTCGTACACT
RL18:AGTGTAGTAGT
RL19:ATAGTATACGT
RL20:CAGTACGTACT
RL21:CGACGACGCGT
RL22:CGACGAGTACT
RL23:CGATACTACGT
RL24:CGTACGTCGAT
RL25:CTACTCGTAGT
RL26:GTACAGTACGT
RL27:GTCGTACGTAT
RL28:GTGTACGACGT
RL29:ACACAGTGAGT
RL30:ACACTCATACT
RL31:ACAGACAGCGT
RL32:ACAGACTATAT
RL33:ACAGAGACTCT
RL34:ACAGCTCGTGT
RL35:ACAGTGTCGAT
RL36:ACGAGCGCGCT
RL37:ACGATGAGTGT
RL38:ACGCGAGAGAT
RL39:ACGCTCTCTCT
RL40:ACGTCGCTGAT
RL41:ACGTCTAGCAT
RL42:ACTAGTGATAT
RL43:ACTCACACTGT
RL44:ACTCACTAGCT
RL45:ACTCTATATAT
RL46:ACTGATCTCGT
RL47:ACTGCTGTACT
RL48:ACTGTAGCGCT
RL49:AGACACTCACT
RL50:AGACATATAGT
RL51:AGACGTGATCT
RL52:AGAGTACAGAT
RL53:AGAGTATCTCT
RL54:AGATACGCTGT
RL55:AGATCTAGTCT
RL56:AGCAGCGTAGT
RL57:AGCGCACGAGT
RL58:AGCGTGTGCGT
RL59:AGCTAGATACT
RL60:AGCTGTCGACT
RL61:AGTATGCACGT
RL62:AGTCGCGCTAT
RL63:AGTCTGTCTGT
RL64:ATACACACGAT
RL65:ATACGCGTGCT
RL66:ATACTAGCACT
RL67:ATAGAGCTAGT
RL68:ATATAGAGTAT
RL69:ATCGCTCACGT
RL70:ATCGTCAGTCT
RL71:ATCTCTCGTAT
RL72:ATCTGAGACGT
RL73:ATGCTACGTCT
RL74:ATGTGACTACT
RL75:CACGAGACAGT
RL76:CACGCGAGTCT
RL77:CACGCTACGAT
RL78:CACGTGTATAT
RL79:CACTACGATGT
RL80:CACTATACTCT
RL81:CAGCGTACTGT
RL82:CAGTCTCTAGT
RL83:CATAGTCGCGT
RL84:CGAGACACTAT
RL85:CGAGAGTGTGT
RL86:CGAGTCATCGT
RL87:CGATCGTATAT
RL88:CGCAGTACGCT
RL89:CGCGATCGTAT
RL90:CGCGCTATACT
RL91:CGTACAGATAT
RL92:CGTAGCTCTCT
RL93:CGTATAGTGCT
RL94:CGTCAGCGACT
RL95:CGTCGCAGTGT
RL96:CGTCTCACGAT
RL97:CGTGACTCAGT
RL98:CTACACGCTCT
RL99:CTACGATATGT
RL100:CTAGACAGACT
RL101:CTAGTACTCAT
RL102:CTATATGTCGT
RL103:CTATCGACACT
RL104:CTATGTAGAGT
RL105:CTCACGTACAT
RL106:CTCGAGTCTCT
RL107:CTCGTCGAGAT
RL108:CTCTACAGCGT
RL109:CTGTCGTGCGT
RL110:CTGTGACGTGT
RL111:GACGCTGTCGT
RL112:GACGTATGACT
RL113:GACTAGCTAGT
RL114:GAGACGTCGCT
RL115:GAGAGAGACGT
RL116:GCGTAGACTAT
RL117:GCGTCGTGTCT
RL118:GCTCTCTACGT
RL119:GTACACTGTAT
RL120:GTACGCGACAT
RL121:GTACTATAGAT
RL122:GTACTGAGTCT
RL123:GTAGCTAGCGT
RL124:GTAGTCACTGT
RL125:GTAGTGTCACT
RL126:GTATACATAGT
RL127:GTCATCGTCGT
RL128:GTCGACACGCT
RL129:GTCGAGTGAGT
RL130:GTCTACTATCT
RL131:GTGTCTAGACT
RL132:GTGTGTATCGT
[Qiu 2003]
1:ATACGC
2:ACTGGC
3:CACAGC
4:TAACCC
5:CAGGCG
6:AGGTAC
7:TGAGCG
8:GACCAC
9:AATCGG
10:CTAAGG
11:GAAGAG
12:AGTGAG
13:GTGGAC
14:GTCACC
15:CGTCCA
16:GATGCC
17:AAGACC
18:GCCTCA
19:CTAGCC
20:TACGGA
21:GCAGGA
[Hamady et al. 2008]
1:AACCAACC
2:AACCAAGG
3:AACCATCG
4:AACCATGC
5:AACCGCAT
6:AACCGCTA
7:AACCGGAA
8:AACCGGTT
9:AACCTACG
10:AACCTAGC
11:AACCTTCC
12:AACCTTGG
13:AACGAACG
14:AACGAAGC
15:AACGATCC
16:AACGATGG
17:AACGCCAT
18:AACGCCTA
19:AACGCGAA
20:AACGCGTT
21:AACGGCAA
22:AACGGCTT
23:AACGTACC
24:AACGTAGG
25:AACGTTCG
26:AACGTTGC
27:AAGCAACG
28:AAGCAAGC
29:AAGCATCC
30:AAGCATGG
31:AAGCCGAA
32:AAGCCGTT
33:AAGCGCAA
34:AAGCGCTT
35:AAGCGGAT
36:AAGCGGTA
37:AAGCTACC
38:AAGCTAGG
39:AAGCTTCG
40:AAGCTTGC
41:AAGGAACC
42:AAGGAAGG
43:AAGGATCG
44:AAGGATGC
45:AAGGCCAA
46:AAGGCCTT
47:AAGGCGAT
48:AAGGCGTA
49:AAGGTACG
50:AAGGTAGC
51:AAGGTTCC
52:AAGGTTGG
53:AATACCGC
54:AATACGCC
55:AATAGCGG
56:AATAGGCG
57:AATTCCGG
58:AATTCGCG
59:AATTCGGC
60:AATTGCCG
61:AATTGCGC
62:AATTGGCC
63:ACACACAC
64:ACACACTG
65:ACACAGAG
66:ACACAGTC
67:ACACCACA
68:ACACCAGT
69:ACACCTCT
70:ACACCTGA
71:ACACGACT
72:ACACGAGA
73:ACACGTCA
74:ACACGTGT
75:ACACTCAG
76:ACACTCTC
77:ACACTGAC
78:ACACTGTG
79:ACAGACAG
80:ACAGACTC
81:ACAGAGAC
82:ACAGAGTG
83:ACAGCACT
84:ACAGCAGA
85:ACAGCTCA
86:ACAGCTGT
87:ACAGGACA
88:ACAGGAGT
89:ACAGGTCT
90:ACAGGTGA
91:ACAGTCAC
92:ACAGTCTG
93:ACAGTGAG
94:ACAGTGTC
95:ACCAACCA
96:ACCAACGT
97:ACCAAGCT
98:ACCAAGGA
99:ACCACAAC
100:ACCACATG
101:ACCACTAG
102:ACCACTTC
103:ACCAGAAG
104:ACCAGATC
105:ACCAGTAC
106:ACCAGTTG
107:ACCATCCT
108:ACCATCGA
109:ACCATGCA
110:ACCATGGT
111:ACCTACCT
112:ACCTACGA
113:ACCTAGCA
114:ACCTAGGT
115:ACCTCAAG
116:ACCTCATC
117:ACCTCTAC
118:ACCTCTTG
119:ACCTGAAC
120:ACCTGATG
121:ACCTGTAG
122:ACCTGTTC
123:ACCTTCCA
124:ACCTTCGT
125:ACCTTGCT
126:ACCTTGGA
127:ACGAACCT
128:ACGAACGA
129:ACGAAGCA
130:ACGAAGGT
131:ACGACAAG
132:ACGACATC
133:ACGACTAC
134:ACGACTTG
135:ACGAGAAC
136:ACGAGATG
137:ACGAGTAG
138:ACGAGTTC
139:ACGATCCA
140:ACGATCGT
141:ACGATGCT
142:ACGATGGA
143:ACGTACCA
144:ACGTACGT
145:ACGTAGCT
146:ACGTAGGA
147:ACGTCAAC
148:ACGTCATG
149:ACGTCTAG
150:ACGTCTTC
151:ACGTGAAG
152:ACGTGATC
153:ACGTGTAC
154:ACGTGTTG
155:ACGTTCCT
156:ACGTTCGA
157:ACGTTGCA
158:ACGTTGGT
159:ACTCACAG
160:ACTCACTC
161:ACTCAGAC
162:ACTCAGTG
163:ACTCCACT
164:ACTCCAGA
165:ACTCCTCA
166:ACTCCTGT
167:ACTCGACA
168:ACTCGAGT
169:ACTCGTCT
170:ACTCGTGA
171:ACTCTCAC
172:ACTCTCTG
173:ACTCTGAG
174:ACTCTGTC
175:ACTGACAC
176:ACTGACTG
177:ACTGAGAG
178:ACTGAGTC
179:ACTGCACA
180:ACTGCAGT
181:ACTGCTCT
182:ACTGCTGA
183:ACTGGACT
184:ACTGGAGA
185:ACTGGTCA
186:ACTGGTGT
187:ACTGTCAG
188:ACTGTCTC
189:ACTGTGAC
190:ACTGTGTG
191:AGACACAG
192:AGACACTC
193:AGACAGAC
194:AGACAGTG
195:AGACCACT
196:AGACCAGA
197:AGACCTCA
198:AGACCTGT
199:AGACGACA
200:AGACGAGT
201:AGACGTCT
202:AGACGTGA
203:AGACTCAC
204:AGACTCTG
205:AGACTGAG
206:AGACTGTC
207:AGAGACAC
208:AGAGACTG
209:AGAGAGAG
210:AGAGAGTC
211:AGAGCACA
212:AGAGCAGT
213:AGAGCTCT
214:AGAGCTGA
215:AGAGGACT
216:AGAGGAGA
217:AGAGGTCA
218:AGAGGTGT
219:AGAGTCAG
220:AGAGTCTC
221:AGAGTGAC
222:AGAGTGTG
223:AGCAACCT
224:AGCAACGA
225:AGCAAGCA
226:AGCAAGGT
227:AGCACAAG
228:AGCACATC
229:AGCACTAC
230:AGCACTTG
231:AGCAGAAC
232:AGCAGATG
233:AGCAGTAG
234:AGCAGTTC
235:AGCATCCA
236:AGCATCGT
237:AGCATGCT
238:AGCATGGA
239:AGCTACCA
240:AGCTACGT
241:AGCTAGCT
242:AGCTAGGA
243:AGCTCAAC
244:AGCTCATG
245:AGCTCTAG
246:AGCTCTTC
247:AGCTGAAG
248:AGCTGATC
249:AGCTGTAC
250:AGCTGTTG
251:AGCTTCCT
252:AGCTTCGA
253:AGCTTGCA
254:AGCTTGGT
255:AGGAACCA
256:AGGAACGT
257:AGGAAGCT
258:AGGAAGGA
259:AGGACAAC
260:AGGACATG
261:AGGACTAG
262:AGGACTTC
263:AGGAGAAG
264:AGGAGATC
265:AGGAGTAC
266:AGGAGTTG
267:AGGATCCT
268:AGGATCGA
269:AGGATGCA
270:AGGATGGT
271:AGGTACCT
272:AGGTACGA
273:AGGTAGCA
274:AGGTAGGT
275:AGGTCAAG
276:AGGTCATC
277:AGGTCTAC
278:AGGTCTTG
279:AGGTGAAC
280:AGGTGATG
281:AGGTGTAG
282:AGGTGTTC
283:AGGTTCCA
284:AGGTTCGT
285:AGGTTGCT
286:AGGTTGGA
287:AGTCACAC
288:AGTCACTG
289:AGTCAGAG
290:AGTCAGTC
291:AGTCCACA
292:AGTCCAGT
293:AGTCCTCT
294:AGTCCTGA
295:AGTCGACT
296:AGTCGAGA
297:AGTCGTCA
298:AGTCGTGT
299:AGTCTCAG
300:AGTCTCTC
301:AGTCTGAC
302:AGTCTGTG
303:AGTGACAG
304:AGTGACTC
305:AGTGAGAC
306:AGTGAGTG
307:AGTGCACT
308:AGTGCAGA
309:AGTGCTCA
310:AGTGCTGT
311:AGTGGACA
312:AGTGGAGT
313:AGTGGTCT
314:AGTGGTGA
315:AGTGTCAC
316:AGTGTCTG
317:AGTGTGAG
318:AGTGTGTC
319:ATAACCGC
320:ATAACGCC
321:ATAAGCGG
322:ATAAGGCG
323:ATATCCGG
324:ATATCGCG
325:ATATCGGC
326:ATATGCCG
327:ATATGCGC
328:ATATGGCC
329:ATCCAACG
330:ATCCAAGC
331:ATCCATCC
332:ATCCATGG
333:ATCCGCAA
334:ATCCGCTT
335:ATCCGGAT
336:ATCCGGTA
337:ATCCTACC
338:ATCCTAGG
339:ATCCTTCG
340:ATCCTTGC
341:ATCGAACC
342:ATCGAAGG
343:ATCGATCG
344:ATCGATGC
345:ATCGCCAA
346:ATCGCCTT
347:ATCGCGAT
348:ATCGCGTA
349:ATCGGCAT
350:ATCGGCTA
351:ATCGTACG
352:ATCGTAGC
353:ATCGTTCC
354:ATCGTTGG
355:ATGCAACC
356:ATGCAAGG
357:ATGCATCG
358:ATGCATGC
359:ATGCCGAT
360:ATGCCGTA
361:ATGCGCAT
362:ATGCGCTA
363:ATGCGGAA
364:ATGCGGTT
365:ATGCTACG
366:ATGCTAGC
367:ATGCTTCC
368:ATGCTTGG
369:ATGGAACG
370:ATGGAAGC
371:ATGGATCC
372:ATGGATGG
373:ATGGCCAT
374:ATGGCCTA
375:ATGGCGAA
376:ATGGCGTT
377:ATGGTACC
378:ATGGTAGG
379:ATGGTTCG
380:ATGGTTGC
381:ATTACCGG
382:ATTACGCG
383:ATTACGGC
384:ATTAGCCG
385:ATTAGCGC
386:ATTAGGCC
387:CAACACCA
388:CAACACGT
389:CAACAGCT
390:CAACAGGA
391:CAACCAAC
392:CAACCATG
393:CAACCTAG
394:CAACCTTC
395:CAACGAAG
396:CAACGATC
397:CAACGTAC
398:CAACGTTG
399:CAACTCCT
400:CAACTCGA
401:CAACTGCA
402:CAACTGGT
403:CAAGACCT
404:CAAGACGA
405:CAAGAGCA
406:CAAGAGGT
407:CAAGCAAG
408:CAAGCATC
409:CAAGCTAC
410:CAAGCTTG
411:CAAGGAAC
412:CAAGGATG
413:CAAGGTAG
414:CAAGGTTC
415:CAAGTCCA
416:CAAGTCGT
417:CAAGTGCT
418:CAAGTGGA
419:CACAACAC
420:CACAACTG
421:CACAAGAG
422:CACAAGTC
423:CACACACA
424:CACACAGT
425:CACACTCT
426:CACACTGA
427:CACAGACT
428:CACAGAGA
429:CACAGTCA
430:CACAGTGT
431:CACATCAG
432:CACATCTC
433:CACATGAC
434:CACATGTG
435:CACTACAG
436:CACTACTC
437:CACTAGAC
438:CACTAGTG
439:CACTCACT
440:CACTCAGA
441:CACTCTCA
442:CACTCTGT
443:CACTGACA
444:CACTGAGT
445:CACTGTCT
446:CACTGTGA
447:CACTTCAC
448:CACTTCTG
449:CACTTGAG
450:CACTTGTC
451:CAGAACAG
452:CAGAACTC
453:CAGAAGAC
454:CAGAAGTG
455:CAGACACT
456:CAGACAGA
457:CAGACTCA
458:CAGACTGT
459:CAGAGACA
460:CAGAGAGT
461:CAGAGTCT
462:CAGAGTGA
463:CAGATCAC
464:CAGATCTG
465:CAGATGAG
466:CAGATGTC
467:CAGTACAC
468:CAGTACTG
469:CAGTAGAG
470:CAGTAGTC
471:CAGTCACA
472:CAGTCAGT
473:CAGTCTCT
474:CAGTCTGA
475:CAGTGACT
476:CAGTGAGA
477:CAGTGTCA
478:CAGTGTGT
479:CAGTTCAG
480:CAGTTCTC
481:CAGTTGAC
482:CAGTTGTG
483:CATCACCT
484:CATCACGA
485:CATCAGCA
486:CATCAGGT
487:CATCCAAG
488:CATCCATC
489:CATCCTAC
490:CATCCTTG
491:CATCGAAC
492:CATCGATG
493:CATCGTAG
494:CATCGTTC
495:CATCTCCA
496:CATCTCGT
497:CATCTGCT
498:CATCTGGA
499:CATGACCA
500:CATGACGT
501:CATGAGCT
502:CATGAGGA
503:CATGCAAC
504:CATGCATG
505:CATGCTAG
506:CATGCTTC
507:CATGGAAG
508:CATGGATC
509:CATGGTAC
510:CATGGTTG
511:CATGTCCT
512:CATGTCGA
513:CATGTGCA
514:CATGTGGT
515:CCAACCAA
516:CCAACCTT
517:CCAACGAT
518:CCAACGTA
519:CCAAGCAT
520:CCAAGCTA
521:CCAAGGAA
522:CCAAGGTT
523:CCAATACG
524:CCAATAGC
525:CCAATTCC
526:CCAATTGG
527:CCATAACG
528:CCATAAGC
529:CCATATCC
530:CCATATGG
531:CCATCCAT
532:CCATCCTA
533:CCATCGAA
534:CCATCGTT
535:CCATGCAA
536:CCATGCTT
537:CCATGGAT
538:CCATGGTA
539:CCATTACC
540:CCATTAGG
541:CCGCAATA
542:CCGCATAA
543:CCGCTATT
544:CCGCTTAT
545:CCGGAATT
546:CCGGATAT
547:CCGGATTA
548:CCGGTAAT
549:CCGGTATA
550:CCGGTTAA
551:CCTAATCC
552:CCTAATGG
553:CCTACCAT
554:CCTACCTA
555:CCTACGAA
556:CCTACGTT
557:CCTAGCAA
558:CCTAGCTT
559:CCTAGGAT
560:CCTAGGTA
561:CCTATACC
562:CCTATAGG
563:CCTATTCG
564:CCTATTGC
565:CCTTAACC
566:CCTTAAGG
567:CCTTATCG
568:CCTTATGC
569:CCTTCCAA
570:CCTTCCTT
571:CCTTCGAT
572:CCTTCGTA
573:CCTTGCAT
574:CCTTGCTA
575:CCTTGGAA
576:CCTTGGTT
577:CGAACCAT
578:CGAACCTA
579:CGAACGAA
580:CGAACGTT
581:CGAAGCAA
582:CGAAGCTT
583:CGAAGGAT
584:CGAAGGTA
585:CGAATACC
586:CGAATAGG
587:CGAATTCG
588:CGAATTGC
589:CGATAACC
590:CGATAAGG
591:CGATATCG
592:CGATATGC
593:CGATCCAA
594:CGATCCTT
595:CGATCGAT
596:CGATCGTA
597:CGATGCAT
598:CGATGCTA
599:CGATGGAA
600:CGATGGTT
601:CGATTACG
602:CGATTAGC
603:CGCCAATA
604:CGCCATAA
605:CGCCTATT
606:CGCCTTAT
607:CGCGAATT
608:CGCGATAT
609:CGCGATTA
610:CGCGTAAT
611:CGCGTATA
612:CGCGTTAA
613:CGGCAATT
614:CGGCATAT
615:CGGCATTA
616:CGGCTAAT
617:CGGCTATA
618:CGGCTTAA
619:CGTAATCG
620:CGTAATGC
621:CGTACCAA
622:CGTACCTT
623:CGTACGAT
624:CGTACGTA
625:CGTAGCAT
626:CGTAGCTA
627:CGTAGGAA
628:CGTAGGTT
629:CGTATACG
630:CGTATAGC
631:CGTATTCC
632:CGTATTGG
633:CGTTAACG
634:CGTTAAGC
635:CGTTATCC
636:CGTTATGG
637:CGTTCCAT
638:CGTTCCTA
639:CGTTCGAA
640:CGTTCGTT
641:CGTTGCAA
642:CGTTGCTT
643:CGTTGGAT
644:CGTTGGTA
645:CTACACCT
646:CTACACGA
647:CTACAGCA
648:CTACAGGT
649:CTACCAAG
650:CTACCATC
651:CTACCTAC
652:CTACCTTG
653:CTACGAAC
654:CTACGATG
655:CTACGTAG
656:CTACGTTC
657:CTACTCCA
658:CTACTCGT
659:CTACTGCT
660:CTACTGGA
661:CTAGACCA
662:CTAGACGT
663:CTAGAGCT
664:CTAGAGGA
665:CTAGCAAC
666:CTAGCATG
667:CTAGCTAG
668:CTAGCTTC
669:CTAGGAAG
670:CTAGGATC
671:CTAGGTAC
672:CTAGGTTG
673:CTAGTCCT
674:CTAGTCGA
675:CTAGTGCA
676:CTAGTGGT
677:CTCAACAG
678:CTCAACTC
679:CTCAAGAC
680:CTCAAGTG
681:CTCACACT
682:CTCACAGA
683:CTCACTCA
684:CTCACTGT
685:CTCAGACA
686:CTCAGAGT
687:CTCAGTCT
688:CTCAGTGA
689:CTCATCAC
690:CTCATCTG
691:CTCATGAG
692:CTCATGTC
693:CTCTACAC
694:CTCTACTG
695:CTCTAGAG
696:CTCTAGTC
697:CTCTCACA
698:CTCTCAGT
699:CTCTCTCT
700:CTCTCTGA
701:CTCTGACT
702:CTCTGAGA
703:CTCTGTCA
704:CTCTGTGT
705:CTCTTCAG
706:CTCTTCTC
707:CTCTTGAC
708:CTCTTGTG
709:CTGAACAC
710:CTGAACTG
711:CTGAAGAG
712:CTGAAGTC
713:CTGACACA
714:CTGACAGT
715:CTGACTCT
716:CTGACTGA
717:CTGAGACT
718:CTGAGAGA
719:CTGAGTCA
720:CTGAGTGT
721:CTGATCAG
722:CTGATCTC
723:CTGATGAC
724:CTGATGTG
725:CTGTACAG
726:CTGTACTC
727:CTGTAGAC
728:CTGTAGTG
729:CTGTCACT
730:CTGTCAGA
731:CTGTCTCA
732:CTGTCTGT
733:CTGTGACA
734:CTGTGAGT
735:CTGTGTCT
736:CTGTGTGA
737:CTGTTCAC
738:CTGTTCTG
739:CTGTTGAG
740:CTGTTGTC
741:CTTCACCA
742:CTTCACGT
743:CTTCAGCT
744:CTTCAGGA
745:CTTCCAAC
746:CTTCCATG
747:CTTCCTAG
748:CTTCCTTC
749:CTTCGAAG
750:CTTCGATC
751:CTTCGTAC
752:CTTCGTTG
753:CTTCTCCT
754:CTTCTCGA
755:CTTCTGCA
756:CTTCTGGT
757:CTTGACCT
758:CTTGACGA
759:CTTGAGCA
760:CTTGAGGT
761:CTTGCAAG
762:CTTGCATC
763:CTTGCTAC
764:CTTGCTTG
765:CTTGGAAC
766:CTTGGATG
767:CTTGGTAG
768:CTTGGTTC
769:CTTGTCCA
770:CTTGTCGT
771:CTTGTGCT
772:CTTGTGGA
773:GAACACCT
774:GAACACGA
775:GAACAGCA
776:GAACAGGT
777:GAACCAAG
778:GAACCATC
779:GAACCTAC
780:GAACCTTG
781:GAACGAAC
782:GAACGATG
783:GAACGTAG
784:GAACGTTC
785:GAACTCCA
786:GAACTCGT
787:GAACTGCT
788:GAACTGGA
789:GAAGACCA
790:GAAGACGT
791:GAAGAGCT
792:GAAGAGGA
793:GAAGCAAC
794:GAAGCATG
795:GAAGCTAG
796:GAAGCTTC
797:GAAGGAAG
798:GAAGGATC
799:GAAGGTAC
800:GAAGGTTG
801:GAAGTCCT
802:GAAGTCGA
803:GAAGTGCA
804:GAAGTGGT
805:GACAACAG
806:GACAACTC
807:GACAAGAC
808:GACAAGTG
809:GACACACT
810:GACACAGA
811:GACACTCA
812:GACACTGT
813:GACAGACA
814:GACAGAGT
815:GACAGTCT
816:GACAGTGA
817:GACATCAC
818:GACATCTG
819:GACATGAG
820:GACATGTC
821:GACTACAC
822:GACTACTG
823:GACTAGAG
824:GACTAGTC
825:GACTCACA
826:GACTCAGT
827:GACTCTCT
828:GACTCTGA
829:GACTGACT
830:GACTGAGA
831:GACTGTCA
832:GACTGTGT
833:GACTTCAG
834:GACTTCTC
835:GACTTGAC
836:GACTTGTG
837:GAGAACAC
838:GAGAACTG
839:GAGAAGAG
840:GAGAAGTC
841:GAGACACA
842:GAGACAGT
843:GAGACTCT
844:GAGACTGA
845:GAGAGACT
846:GAGAGAGA
847:GAGAGTCA
848:GAGAGTGT
849:GAGATCAG
850:GAGATCTC
851:GAGATGAC
852:GAGATGTG
853:GAGTACAG
854:GAGTACTC
855:GAGTAGAC
856:GAGTAGTG
857:GAGTCACT
858:GAGTCAGA
859:GAGTCTCA
860:GAGTCTGT
861:GAGTGACA
862:GAGTGAGT
863:GAGTGTCT
864:GAGTGTGA
865:GAGTTCAC
866:GAGTTCTG
867:GAGTTGAG
868:GAGTTGTC
869:GATCACCA
870:GATCACGT
871:GATCAGCT
872:GATCAGGA
873:GATCCAAC
874:GATCCATG
875:GATCCTAG
876:GATCCTTC
877:GATCGAAG
878:GATCGATC
879:GATCGTAC
880:GATCGTTG
881:GATCTCCT
882:GATCTCGA
883:GATCTGCA
884:GATCTGGT
885:GATGACCT
886:GATGACGA
887:GATGAGCA
888:GATGAGGT
889:GATGCAAG
890:GATGCATC
891:GATGCTAC
892:GATGCTTG
893:GATGGAAC
894:GATGGATG
895:GATGGTAG
896:GATGGTTC
897:GATGTCCA
898:GATGTCGT
899:GATGTGCT
900:GATGTGGA
901:GCAACCAT
902:GCAACCTA
903:GCAACGAA
904:GCAACGTT
905:GCAAGCAA
906:GCAAGCTT
907:GCAAGGAT
908:GCAAGGTA
909:GCAATACC
910:GCAATAGG
911:GCAATTCG
912:GCAATTGC
913:GCATAACC
914:GCATAAGG
915:GCATATCG
916:GCATATGC
917:GCATCCAA
918:GCATCCTT
919:GCATCGAT
920:GCATCGTA
921:GCATGCAT
922:GCATGCTA
923:GCATGGAA
924:GCATGGTT
925:GCATTACG
926:GCATTAGC
927:GCCGAATT
928:GCCGATAT
929:GCCGATTA
930:GCCGTAAT
931:GCCGTATA
932:GCCGTTAA
933:GCGCAATT
934:GCGCATAT
935:GCGCATTA
936:GCGCTAAT
937:GCGCTATA
938:GCGCTTAA
939:GCGGAATA
940:GCGGATAA
941:GCGGTATT
942:GCGGTTAT
943:GCTAATCG
944:GCTAATGC
945:GCTACCAA
946:GCTACCTT
947:GCTACGAT
948:GCTACGTA
949:GCTAGCAT
950:GCTAGCTA
951:GCTAGGAA
952:GCTAGGTT
953:GCTATACG
954:GCTATAGC
955:GCTATTCC
956:GCTATTGG
957:GCTTAACG
958:GCTTAAGC
959:GCTTATCC
960:GCTTATGG
961:GCTTCCAT
962:GCTTCCTA
963:GCTTCGAA
964:GCTTCGTT
965:GCTTGCAA
966:GCTTGCTT
967:GCTTGGAT
968:GCTTGGTA
969:GGAACCAA
970:GGAACCTT
971:GGAACGAT
972:GGAACGTA
973:GGAAGCAT
974:GGAAGCTA
975:GGAAGGAA
976:GGAAGGTT
977:GGAATACG
978:GGAATAGC
979:GGAATTCC
980:GGAATTGG
981:GGATAACG
982:GGATAAGC
983:GGATATCC
984:GGATATGG
985:GGATCCAT
986:GGATCCTA
987:GGATCGAA
988:GGATCGTT
989:GGATGCAA
990:GGATGCTT
991:GGATGGAT
992:GGATGGTA
993:GGATTACC
994:GGATTAGG
995:GGCCAATT
996:GGCCATAT
997:GGCCATTA
998:GGCCTAAT
999:GGCCTATA
1000:GGCCTTAA
1001:GGCGAATA
1002:GGCGATAA
1003:GGCGTATT
1004:GGCGTTAT
1005:GGTAATCC
1006:GGTAATGG
1007:GGTACCAT
1008:GGTACCTA
1009:GGTACGAA
1010:GGTACGTT
1011:GGTAGCAA
1012:GGTAGCTT
1013:GGTAGGAT
1014:GGTAGGTA
1015:GGTATACC
1016:GGTATAGG
1017:GGTATTCG
1018:GGTATTGC
1019:GGTTAACC
1020:GGTTAAGG
1021:GGTTATCG
1022:GGTTATGC
1023:GGTTCCAA
1024:GGTTCCTT
1025:GGTTCGAT
1026:GGTTCGTA
1027:GGTTGCAT
1028:GGTTGCTA
1029:GGTTGGAA
1030:GGTTGGTT
1031:GTACACCA
1032:GTACACGT
1033:GTACAGCT
1034:GTACAGGA
1035:GTACCAAC
1036:GTACCATG
1037:GTACCTAG
1038:GTACCTTC
1039:GTACGAAG
1040:GTACGATC
1041:GTACGTAC
1042:GTACGTTG
1043:GTACTCCT
1044:GTACTCGA
1045:GTACTGCA
1046:GTACTGGT
1047:GTAGACCT
1048:GTAGACGA
1049:GTAGAGCA
1050:GTAGAGGT
1051:GTAGCAAG
1052:GTAGCATC
1053:GTAGCTAC
1054:GTAGCTTG
1055:GTAGGAAC
1056:GTAGGATG
1057:GTAGGTAG
1058:GTAGGTTC
1059:GTAGTCCA
1060:GTAGTCGT
1061:GTAGTGCT
1062:GTAGTGGA
1063:GTCAACAC
1064:GTCAACTG
1065:GTCAAGAG
1066:GTCAAGTC
1067:GTCACACA
1068:GTCACAGT
1069:GTCACTCT
1070:GTCACTGA
1071:GTCAGACT
1072:GTCAGAGA
1073:GTCAGTCA
1074:GTCAGTGT
1075:GTCATCAG
1076:GTCATCTC
1077:GTCATGAC
1078:GTCATGTG
1079:GTCTACAG
1080:GTCTACTC
1081:GTCTAGAC
1082:GTCTAGTG
1083:GTCTCACT
1084:GTCTCAGA
1085:GTCTCTCA
1086:GTCTCTGT
1087:GTCTGACA
1088:GTCTGAGT
1089:GTCTGTCT
1090:GTCTGTGA
1091:GTCTTCAC
1092:GTCTTCTG
1093:GTCTTGAG
1094:GTCTTGTC
1095:GTGAACAG
1096:GTGAACTC
1097:GTGAAGAC
1098:GTGAAGTG
1099:GTGACACT
1100:GTGACAGA
1101:GTGACTCA
1102:GTGACTGT
1103:GTGAGACA
1104:GTGAGAGT
1105:GTGAGTCT
1106:GTGAGTGA
1107:GTGATCAC
1108:GTGATCTG
1109:GTGATGAG
1110:GTGATGTC
1111:GTGTACAC
1112:GTGTACTG
1113:GTGTAGAG
1114:GTGTAGTC
1115:GTGTCACA
1116:GTGTCAGT
1117:GTGTCTCT
1118:GTGTCTGA
1119:GTGTGACT
1120:GTGTGAGA
1121:GTGTGTCA
1122:GTGTGTGT
1123:GTGTTCAG
1124:GTGTTCTC
1125:GTGTTGAC
1126:GTGTTGTG
1127:GTTCACCT
1128:GTTCACGA
1129:GTTCAGCA
1130:GTTCAGGT
1131:GTTCCAAG
1132:GTTCCATC
1133:GTTCCTAC
1134:GTTCCTTG
1135:GTTCGAAC
1136:GTTCGATG
1137:GTTCGTAG
1138:GTTCGTTC
1139:GTTCTCCA
1140:GTTCTCGT
1141:GTTCTGCT
1142:GTTCTGGA
1143:GTTGACCA
1144:GTTGACGT
1145:GTTGAGCT
1146:GTTGAGGA
1147:GTTGCAAC
1148:GTTGCATG
1149:GTTGCTAG
1150:GTTGCTTC
1151:GTTGGAAG
1152:GTTGGATC
1153:GTTGGTAC
1154:GTTGGTTG
1155:GTTGTCCT
1156:GTTGTCGA
1157:GTTGTGCA
1158:GTTGTGGT
1159:TAATCCGG
1160:TAATCGCG
1161:TAATCGGC
1162:TAATGCCG
1163:TAATGCGC
1164:TAATGGCC
1165:TACCAACG
1166:TACCAAGC
1167:TACCATCC
1168:TACCATGG
1169:TACCGCAA
1170:TACCGCTT
1171:TACCGGAT
1172:TACCGGTA
1173:TACCTACC
1174:TACCTAGG
1175:TACCTTCG
1176:TACCTTGC
1177:TACGAACC
1178:TACGAAGG
1179:TACGATCG
1180:TACGATGC
1181:TACGCCAA
1182:TACGCCTT
1183:TACGCGAT
1184:TACGCGTA
1185:TACGGCAT
1186:TACGGCTA
1187:TACGTACG
1188:TACGTAGC
1189:TACGTTCC
1190:TACGTTGG
1191:TAGCAACC
1192:TAGCAAGG
1193:TAGCATCG
1194:TAGCATGC
1195:TAGCCGAT
1196:TAGCCGTA
1197:TAGCGCAT
1198:TAGCGCTA
1199:TAGCGGAA
1200:TAGCGGTT
1201:TAGCTACG
1202:TAGCTAGC
1203:TAGCTTCC
1204:TAGCTTGG
1205:TAGGAACG
1206:TAGGAAGC
1207:TAGGATCC
1208:TAGGATGG
1209:TAGGCCAT
1210:TAGGCCTA
1211:TAGGCGAA
1212:TAGGCGTT
1213:TAGGTACC
1214:TAGGTAGG
1215:TAGGTTCG
1216:TAGGTTGC
1217:TATACCGG
1218:TATACGCG
1219:TATACGGC
1220:TATAGCCG
1221:TATAGCGC
1222:TATAGGCC
1223:TATTCCGC
1224:TATTCGCC
1225:TATTGCGG
1226:TATTGGCG
1227:TCACACAG
1228:TCACACTC
1229:TCACAGAC
1230:TCACAGTG
1231:TCACCACT
1232:TCACCAGA
1233:TCACCTCA
1234:TCACCTGT
1235:TCACGACA
1236:TCACGAGT
1237:TCACGTCT
1238:TCACGTGA
1239:TCACTCAC
1240:TCACTCTG
1241:TCACTGAG
1242:TCACTGTC
1243:TCAGACAC
1244:TCAGACTG
1245:TCAGAGAG
1246:TCAGAGTC
1247:TCAGCACA
1248:TCAGCAGT
1249:TCAGCTCT
1250:TCAGCTGA
1251:TCAGGACT
1252:TCAGGAGA
1253:TCAGGTCA
1254:TCAGGTGT
1255:TCAGTCAG
1256:TCAGTCTC
1257:TCAGTGAC
1258:TCAGTGTG
1259:TCCAACCT
1260:TCCAACGA
1261:TCCAAGCA
1262:TCCAAGGT
1263:TCCACAAG
1264:TCCACATC
1265:TCCACTAC
1266:TCCACTTG
1267:TCCAGAAC
1268:TCCAGATG
1269:TCCAGTAG
1270:TCCAGTTC
1271:TCCATCCA
1272:TCCATCGT
1273:TCCATGCT
1274:TCCATGGA
1275:TCCTACCA
1276:TCCTACGT
1277:TCCTAGCT
1278:TCCTAGGA
1279:TCCTCAAC
1280:TCCTCATG
1281:TCCTCTAG
1282:TCCTCTTC
1283:TCCTGAAG
1284:TCCTGATC
1285:TCCTGTAC
1286:TCCTGTTG
1287:TCCTTCCT
1288:TCCTTCGA
1289:TCCTTGCA
1290:TCCTTGGT
1291:TCGAACCA
1292:TCGAACGT
1293:TCGAAGCT
1294:TCGAAGGA
1295:TCGACAAC
1296:TCGACATG
1297:TCGACTAG
1298:TCGACTTC
1299:TCGAGAAG
1300:TCGAGATC
1301:TCGAGTAC
1302:TCGAGTTG
1303:TCGATCCT
1304:TCGATCGA
1305:TCGATGCA
1306:TCGATGGT
1307:TCGTACCT
1308:TCGTACGA
1309:TCGTAGCA
1310:TCGTAGGT
1311:TCGTCAAG
1312:TCGTCATC
1313:TCGTCTAC
1314:TCGTCTTG
1315:TCGTGAAC
1316:TCGTGATG
1317:TCGTGTAG
1318:TCGTGTTC
1319:TCGTTCCA
1320:TCGTTCGT
1321:TCGTTGCT
1322:TCGTTGGA
1323:TCTCACAC
1324:TCTCACTG
1325:TCTCAGAG
1326:TCTCAGTC
1327:TCTCCACA
1328:TCTCCAGT
1329:TCTCCTCT
1330:TCTCCTGA
1331:TCTCGACT
1332:TCTCGAGA
1333:TCTCGTCA
1334:TCTCGTGT
1335:TCTCTCAG
1336:TCTCTCTC
1337:TCTCTGAC
1338:TCTCTGTG
1339:TCTGACAG
1340:TCTGACTC
1341:TCTGAGAC
1342:TCTGAGTG
1343:TCTGCACT
1344:TCTGCAGA
1345:TCTGCTCA
1346:TCTGCTGT
1347:TCTGGACA
1348:TCTGGAGT
1349:TCTGGTCT
1350:TCTGGTGA
1351:TCTGTCAC
1352:TCTGTCTG
1353:TCTGTGAG
1354:TCTGTGTC
1355:TGACACAC
1356:TGACACTG
1357:TGACAGAG
1358:TGACAGTC
1359:TGACCACA
1360:TGACCAGT
1361:TGACCTCT
1362:TGACCTGA
1363:TGACGACT
1364:TGACGAGA
1365:TGACGTCA
1366:TGACGTGT
1367:TGACTCAG
1368:TGACTCTC
1369:TGACTGAC
1370:TGACTGTG
1371:TGAGACAG
1372:TGAGACTC
1373:TGAGAGAC
1374:TGAGAGTG
1375:TGAGCACT
1376:TGAGCAGA
1377:TGAGCTCA
1378:TGAGCTGT
1379:TGAGGACA
1380:TGAGGAGT
1381:TGAGGTCT
1382:TGAGGTGA
1383:TGAGTCAC
1384:TGAGTCTG
1385:TGAGTGAG
1386:TGAGTGTC
1387:TGCAACCA
1388:TGCAACGT
1389:TGCAAGCT
1390:TGCAAGGA
1391:TGCACAAC
1392:TGCACATG
1393:TGCACTAG
1394:TGCACTTC
1395:TGCAGAAG
1396:TGCAGATC
1397:TGCAGTAC
1398:TGCAGTTG
1399:TGCATCCT
1400:TGCATCGA
1401:TGCATGCA
1402:TGCATGGT
1403:TGCTACCT
1404:TGCTACGA
1405:TGCTAGCA
1406:TGCTAGGT
1407:TGCTCAAG
1408:TGCTCATC
1409:TGCTCTAC
1410:TGCTCTTG
1411:TGCTGAAC
1412:TGCTGATG
1413:TGCTGTAG
1414:TGCTGTTC
1415:TGCTTCCA
1416:TGCTTCGT
1417:TGCTTGCT
1418:TGCTTGGA
1419:TGGAACCT
1420:TGGAACGA
1421:TGGAAGCA
1422:TGGAAGGT
1423:TGGACAAG
1424:TGGACATC
1425:TGGACTAC
1426:TGGACTTG
1427:TGGAGAAC
1428:TGGAGATG
1429:TGGAGTAG
1430:TGGAGTTC
1431:TGGATCCA
1432:TGGATCGT
1433:TGGATGCT
1434:TGGATGGA
1435:TGGTACCA
1436:TGGTACGT
1437:TGGTAGCT
1438:TGGTAGGA
1439:TGGTCAAC
1440:TGGTCATG
1441:TGGTCTAG
1442:TGGTCTTC
1443:TGGTGAAG
1444:TGGTGATC
1445:TGGTGTAC
1446:TGGTGTTG
1447:TGGTTCCT
1448:TGGTTCGA
1449:TGGTTGCA
1450:TGGTTGGT
1451:TGTCACAG
1452:TGTCACTC
1453:TGTCAGAC
1454:TGTCAGTG
1455:TGTCCACT
1456:TGTCCAGA
1457:TGTCCTCA
1458:TGTCCTGT
1459:TGTCGACA
1460:TGTCGAGT
1461:TGTCGTCT
1462:TGTCGTGA
1463:TGTCTCAC
1464:TGTCTCTG
1465:TGTCTGAG
1466:TGTCTGTC
1467:TGTGACAC
1468:TGTGACTG
1469:TGTGAGAG
1470:TGTGAGTC
1471:TGTGCACA
1472:TGTGCAGT
1473:TGTGCTCT
1474:TGTGCTGA
1475:TGTGGACT
1476:TGTGGAGA
1477:TGTGGTCA
1478:TGTGGTGT
1479:TGTGTCAG
1480:TGTGTCTC
1481:TGTGTGAC
1482:TGTGTGTG
1483:TTAACCGG
1484:TTAACGCG
1485:TTAACGGC
1486:TTAAGCCG
1487:TTAAGCGC
1488:TTAAGGCC
1489:TTATCCGC
1490:TTATCGCC
1491:TTATGCGG
1492:TTATGGCG
1493:TTCCAACC
1494:TTCCAAGG
1495:TTCCATCG
1496:TTCCATGC
1497:TTCCGCAT
1498:TTCCGCTA
1499:TTCCGGAA
1500:TTCCGGTT
1501:TTCCTACG
1502:TTCCTAGC
1503:TTCCTTCC
1504:TTCCTTGG
1505:TTCGAACG
1506:TTCGAAGC
1507:TTCGATCC
1508:TTCGATGG
1509:TTCGCCAT
1510:TTCGCCTA
1511:TTCGCGAA
1512:TTCGCGTT
1513:TTCGGCAA
1514:TTCGGCTT
1515:TTCGTACC
1516:TTCGTAGG
1517:TTCGTTCG
1518:TTCGTTGC
1519:TTGCAACG
1520:TTGCAAGC
1521:TTGCATCC
1522:TTGCATGG
1523:TTGCCGAA
1524:TTGCCGTT
1525:TTGCGCAA
1526:TTGCGCTT
1527:TTGCGGAT
1528:TTGCGGTA
1529:TTGCTACC
1530:TTGCTAGG
1531:TTGCTTCG
1532:TTGCTTGC
1533:TTGGAACC
1534:TTGGAAGG
1535:TTGGATCG
1536:TTGGATGC
1537:TTGGCCAA
1538:TTGGCCTT
1539:TTGGCGAT
1540:TTGGCGTA
1541:TTGGTACG
1542:TTGGTAGC
1543:TTGGTTCC
1544:TTGGTTGG
[Hamady et al. 2008, first 80]
1:AACCAACC
2:AACCAAGG
3:AACCATCG
4:AACCATGC
5:AACCGCAT
6:AACCGCTA
7:AACCGGAA
8:AACCGGTT
9:AACCTACG
10:AACCTAGC
11:AACCTTCC
12:AACCTTGG
13:AACGAACG
14:AACGAAGC
15:AACGATCC
16:AACGATGG
17:AACGCCAT
18:AACGCCTA
19:AACGCGAA
20:AACGCGTT
21:AACGGCAA
22:AACGGCTT
23:AACGTACC
24:AACGTAGG
25:AACGTTCG
26:AACGTTGC
27:AAGCAACG
28:AAGCAAGC
29:AAGCATCC
30:AAGCATGG
31:AAGCCGAA
32:AAGCCGTT
33:AAGCGCAA
34:AAGCGCTT
35:AAGCGGAT
36:AAGCGGTA
37:AAGCTACC
38:AAGCTAGG
39:AAGCTTCG
40:AAGCTTGC
41:AAGGAACC
42:AAGGAAGG
43:AAGGATCG
44:AAGGATGC
45:AAGGCCAA
46:AAGGCCTT
47:AAGGCGAT
48:AAGGCGTA
49:AAGGTACG
50:AAGGTAGC
51:AAGGTTCC
52:AAGGTTGG
53:AATACCGC
54:AATACGCC
55:AATAGCGG
56:AATAGGCG
57:AATTCCGG
58:AATTCGCG
59:AATTCGGC
60:AATTGCCG
61:AATTGCGC
62:AATTGGCC
63:ACACACAC
64:ACACACTG
65:ACACAGAG
66:ACACAGTC
67:ACACCACA
68:ACACCAGT
69:ACACCTCT
70:ACACCTGA
71:ACACGACT
72:ACACGAGA
73:ACACGTCA
74:ACACGTGT
75:ACACTCAG
76:ACACTCTC
77:ACACTGAC
78:ACACTGTG
79:ACAGACAG
80:ACAGACTC
[Hamady et al. 2008, first 80 in 2bit]
1:1111101011111010
2:1111101011110101
3:1111101011001001
4:1111101011000110
5:1111101001101100
6:1111101001100011
7:1111101001011111
8:1111101001010000
9:1111101000111001
10:1111101000110110
11:1111101000001010
12:1111101000000101
13:1111100111111001
14:1111100111110110
15:1111100111001010
16:1111100111000101
17:1111100110101100
18:1111100110100011
19:1111100110011111
20:1111100110010000
21:1111100101101111
22:1111100101100000
23:1111100100111010
24:1111100100110101
25:1111100100001001
26:1111100100000110
27:1111011011111001
28:1111011011110110
29:1111011011001010
30:1111011011000101
31:1111011010011111
32:1111011010010000
33:1111011001101111
34:1111011001100000
35:1111011001011100
36:1111011001010011
37:1111011000111010
38:1111011000110101
39:1111011000001001
40:1111011000000110
41:1111010111111010
42:1111010111110101
43:1111010111001001
44:1111010111000110
45:1111010110101111
46:1111010110100000
47:1111010110011100
48:1111010110010011
49:1111010100111001
50:1111010100110110
51:1111010100001010
52:1111010100000101
53:1111001110100110
54:1111001110011010
55:1111001101100101
56:1111001101011001
57:1111000010100101
58:1111000010011001
59:1111000010010110
60:1111000001101001
61:1111000001100110
62:1111000001011010
63:1110111011101110
64:1110111011100001
65:1110111011011101
66:1110111011010010
67:1110111010111011
68:1110111010110100
69:1110111010001000
70:1110111010000111
71:1110111001111000
72:1110111001110111
73:1110111001001011
74:1110111001000100
75:1110111000101101
76:1110111000100010
77:1110111000011110
78:1110111000010001
79:1110110111101101
80:1110110111100010
[Frank 2009 6nt]
#
# barcrawl -l 6 -m 3
#
1:TTATCC
2:TTAAGG
3:TTCTTG
4:TTCAAC
5:TTCCGT
6:TTCGCA
7:TTGTGA
8:TTGACT
9:TTGGTC
10:TATTCG
11:TATAGC
12:TAACTC
13:TACCAA
14:TACGTT
15:TAGTAC
16:TAGATG
17:TCTACA
18:TCTCGG
19:TCTGAT
20:TCATGT
21:TCAGCG
22:TCGCTT
23:TGTCTA
24:TGTGCC
25:TGACAG
26:TGAGGA
27:TGCACG
28:ATTCTC
29:ATTGAG
30:ATACCT
31:ATCTGC
32:ATGCAA
33:AATCCA
34:AATGGT
35:AACTAG
36:AACACT
37:AAGAGA
38:AAGGCC
39:ACTTAC
40:ACATTG
41:ACAACC
42:ACACGA
43:ACCTCA
44:ACCAGG
45:ACGAAT
46:ACGGTA
47:AGTTGG
48:AGTCAT
49:AGAAGT
50:AGCCTG
51:AGCGAC
52:AGGTTC
53:CTTATG
54:CTACGC
55:CTAGAA
56:CTCTCT
57:CTCCAG
58:CATCTT
59:CATGAC
60:CAAGTG
61:CACATA
62:CCTTGA
63:CCAATT
64:CCGTAG
65:CGTACT
66:CGATTA
67:CGGTGT
68:CGGAAC
69:GTTAGT
70:GTAACA
71:GTGTAT
72:GTGCTG
73:GATAAG
74:GAATCT
75:GAACGG
76:GACTGA
77:GCTATC
78:GCTCAA
79:GGATGC
80:GGACTT
81:GGCAAT
82:GGCGTA
[Frank 2009 8nt]
#
# barcrawl -l 8 -m 3
#
1:TTATTCCG
2:TTATTGGC
3:TTATCACC
4:TTATCGTG
5:TTATGAGG
6:TTATGCTC
7:TTAACTCG
8:TTAACCAC
9:TTAACGGT
10:TTAAGTGC
11:TTAAGCCT
12:TTAAGGAG
13:TTACTGCA
14:TTACATCC
15:TTACACTG
16:TTACCAAG
17:TTACGCGA
18:TTAGATGG
19:TTAGAGTC
20:TTAGCAGA
21:TTAGGAAC
22:TTCTTCAC
23:TTCTTGCT
24:TTCTATCG
25:TTCTAAGC
26:TTCTCTTC
27:TTCTCCGT
28:TTCTCGAA
29:TTCTGTGA
30:TTCATACC
31:TTCATCTG
32:TTCATGGA
33:TTCAAGAC
34:TTCACAGG
35:TTCAGCAA
36:TTCAGGTT
37:TTCCTTAG
38:TTCCTGTC
39:TTCCAACT
40:TTCCGATA
41:TTCGTTGT
42:TTCGTCCA
43:TTCGAATG
44:TTGTTCGA
45:TTGTACAG
46:TTGTAGCC
47:TTGTCTCT
48:TTGTGTTG
49:TTGTGGAT
50:TTGATGCG
51:TTGAACGT
52:TTGACTGA
53:TTGAGATC
54:TTGCTATG
55:TTGCTCCT
56:TTGCAGTT
57:TTGCCTAC
58:TTGCGTCA
59:TTGGTTCC
60:TTGGTGTA
61:TTGGCATT
62:TTGGCCAA
63:TATTACGC
64:TATTCTCC
65:TATTCAGG
66:TATTGCTG
67:TATATCGG
68:TATATGCC
69:TATACCTC
70:TATACGAG
71:TATAGACG
72:TATCTTCG
73:TATCTAGC
74:TATCAGTC
75:TATCCTGA
76:TATCCACT
77:TATCGTAC
78:TATCGCCA
79:TATGTCAC
80:TATGTGTG
81:TATGAACC
82:TATGCCGT
83:TATGCGCA
84:TATGGTCT
85:TATGGAGA
86:TAATAGCG
87:TAATCCAG
88:TAATGGAC
89:TAACTCTC
90:TAACTGAG
91:TAACAAGG
92:TAACACCT
93:TAACCTTG
94:TAACCGCC
95:TAAGTACG
96:TAAGTGGT
97:TAAGCATC
98:TAAGGCTT
99:TACTACCA
100:TACTAGGT
101:TACTCAAC
102:TACTGTAG
103:TACTGACT
104:TACATTGC
105:TACAACAG
106:TACACTCA
107:TACAGCGT
108:TACCTACA
109:TACCAGAA
110:TACCGGTG
111:TACGATTC
112:TACGCTAT
113:TACGCCTG
114:TAGTTACC
115:TAGTCCTT
116:TAGTCGGA
117:TAGTGCAA
118:TAGAATCC
119:TAGAAGTG
120:TAGACAGC
121:TAGAGGCA
122:TAGCTTGT
123:TAGCATAG
124:TAGCCGAT
125:TAGGATGA
126:TAGGACAT
127:TAGGCTCG
128:TCTTATGG
129:TCTTACCT
130:TCTTAGAC
131:TCTTCCAA
132:TCTTCGTT
133:TCTTGTCA
134:TCTTGAAG
135:TCTAACTG
136:TCTAAGGT
137:TCTACTAC
138:TCTACAGA
139:TCTAGCAT
140:TCTCTCTA
141:TCTCTGAT
142:TCTCAGCG
143:TCTCCATC
144:TCTCGTGT
145:TCTGTTAG
146:TCTGTACT
147:TCTGTGGC
148:TCTGACGA
149:TCTGGCTC
150:TCATCCGC
151:TCAATTCC
152:TCAATAGG
153:TCAACACT
154:TCAACGTA
155:TCAAGTTG
156:TCACTTGA
157:TCACTAAC
158:TCACACAA
159:TCACCTAT
160:TCACGACG
161:TCACGGTC
162:TCAGTCAT
163:TCAGATAC
164:TCAGACCG
165:TCAGCGAG
166:TCCTTATC
167:TCCTTCGG
168:TCCTAGTA
169:TCCTCACA
170:TCCTGCTT
171:TCCATCCT
172:TCCATGAG
173:TCCAACGC
174:TCCACTGT
175:TCCGTAGA
176:TCCGATCT
177:TCCGGTTA
178:TCCGGAAT
179:TCGTTGCA
180:TCGTATTC
181:TCGTAACG
182:TCGTCTAG
183:TCGTGATA
184:TCGATCAA
185:TCGATGTT
186:TCGAGTCT
187:TCGAGGAC
188:TCGCAAGT
189:TCGCCTTA
190:TCGGAGAA
191:TCGGCAAC
192:TGTTAGTG
193:TGTTCTGT
194:TGTTGTTC
195:TGTTGGAA
196:TGTATCCA
197:TGTAATCG
198:TGTAACAC
199:TGTACGCT
200:TGTAGAGC
201:TGTCTCAG
202:TGTCATGC
203:TGTCACTT
204:TGTCCGTA
205:TGTGTATC
206:TGTGAAGT
207:TGTGCTAA
208:TGTGCACG
209:TGTGGTGG
210:TGATTCGT
211:TGATAGGA
212:TGATCTAC
213:TGATGTCT
214:TGAATGTG
215:TGAACCGA
216:TGAAGACA
217:TGACAATC
218:TGACCTCA
219:TGACCAGT
220:TGACGTAG
221:TGAGTTGC
222:TGAGTGAA
223:TGAGACTA
224:TGAGCGTT
225:TGCTTAAG
226:TGCTTCTA
227:TGCTACAT
228:TGCAATGA
229:TGCACTAG
230:TGCACCTT
231:TGCAGTCC
232:TGCCTATT
233:TGCCGAAC
234:TGCGTTCG
235:TGCGAGAG
236:TGCGCATA
237:TGGTTGTC
238:TGGTCAAT
239:TGGATTAC
240:TGGATAGT
241:TGGAAGAT
242:TGGAGCTA
243:TGGCTGGA
244:TGGCACCA
245:TGGCGACT
246:ATTAAGCG
247:ATTACTGG
248:ATTAGTCC
249:ATTCTCGG
250:ATTCTGAC
251:ATTCACTC
252:ATTCCATG
253:ATTCCGCT
254:ATTCGTAG
255:ATTGTTGC
256:ATTGAAGG
257:ATTGACCT
258:ATTGCAAC
259:ATTGCCGA
260:ATTGGACA
261:ATATGTCG
262:ATAATCGC
263:ATAACGTC
264:ATAAGCTG
265:ATACTACG
266:ATACAAGC
267:ATACCTGT
268:ATACGCAC
269:ATACGGTT
270:ATAGTCAG
271:ATAGTGCT
272:ATAGCTCC
273:ATAGCGAA
274:ATAGGAGT
275:ATCTTGTG
276:ATCTAGGA
277:ATCTCAAG
278:ATCTCGCC
279:ATCTGATC
280:ATCTGCGG
281:ATCAATGC
282:ATCAACCA
283:ATCACGAT
284:ATCAGACT
285:ATCCTTCT
286:ATCCATTG
287:ATCCGGCA
288:ATCGTCTT
289:ATCGACAC
290:ATCGGTAT
291:ATGTTAGC
292:ATGTATGG
293:ATGTCCTC
294:ATGTCGGT
295:ATGTGCCA
296:ATGAGTGT
297:ATGAGAAG
298:ATGCTTGA
299:ATGCACAA
300:ATGCCACC
301:ATGGATCA
302:ATGGACTG
303:ATGGAGGC
304:ATGGCTAG
305:AATTACCG
306:AATTCCAC
307:AATTGTGG
308:AATTGGTC
309:AATAAGGC
310:AATACACC
311:AATAGCCT
312:AATCTGCA
313:AATCATCC
314:AATCAGAG
315:AATCGCGC
316:AATGCTTC
317:AATGCGAT
318:AATGGCAA
319:AACTTACG
320:AACTTGGC
321:AACTCTGT
322:AACTCCTA
323:AACTGTCA
324:AACTGGAT
325:AACATCAC
326:AACATGCT
327:AACAATCG
328:AACACATG
329:AACACGGA
330:AACAGTTC
331:AACCTATC
332:AACCTCGT
333:AACCAAGA
334:AACCGCAG
335:AACGTTAG
336:AACGAACT
337:AACGAGTA
338:AACGGAGC
339:AAGTTCTG
340:AAGTAGAC
341:AAGTCACT
342:AAGTGGCG
343:AAGATTGG
344:AAGATCCA
345:AAGATGTC
346:AAGACTAC
347:AAGACCGT
348:AAGAGAGA
349:AAGCTAAG
350:AAGCAGCT
351:AAGCCTCA
352:AAGCGTTG
353:AAGCGGAA
354:AAGGTAGT
355:AAGGAATC
356:AAGGCGTG
357:ACTTAACC
358:ACTTCTTG
359:ACTTCAGT
360:ACTTCGCA
361:ACTTGTAC
362:ACTTGCGA
363:ACTATTCG
364:ACTATAGC
365:ACTACCTT
366:ACTAGATG
367:ACTCTCCT
368:ACTCATGA
369:ACTCGAAT
370:ACTGTCTG
371:ACTGTGAA
372:ACTGAGTT
373:ACTGCATA
374:ACATTCTC
375:ACATTGAG
376:ACATACGT
377:ACATGACA
378:ACAATGGT
379:ACAACTGA
380:ACAACAAC
381:ACAACGCG
382:ACAAGGAA
383:ACACTGTA
384:ACACATTC
385:ACACAGAT
386:ACACCAGG
387:ACACGTCT
388:ACAGTTGG
389:ACAGTACC
390:ACAGAATG
391:ACAGAGCA
392:ACAGGCTA
393:ACCTTCAT
394:ACCTAAGG
395:ACCTAGCT
396:ACCTCTAA
397:ACCATCGA
398:ACCAAGTC
399:ACCACTCC
400:ACCAGTAG
401:ACGTACTA
402:ACGTGCAG
403:ACGTGGTT
404:ACGAATTG
405:ACGAACAC
406:ACGAGACC
407:ACGCTTAC
408:ACGCCATT
409:ACGGTTCT
410:ACGGAAGA
411:AGTTAGGT
412:AGTTCATC
413:AGTTCCGG
414:AGTTGACT
415:AGTATCTC
416:AGTATGAG
417:AGTAACGA
418:AGTCTAGT
419:AGTCAACA
420:AGTCCTAC
421:AGTCGTTA
422:AGTGTTCA
423:AGTGATTG
424:AGTGAGCC
425:AGTGGAAG
426:AGTGGCTT
427:AGATTGCA
428:AGATACTG
429:AGATCACG
430:AGATCGAT
431:AGATGTGA
432:AGATGAAC
433:AGAACTTG
434:AGAAGAGG
435:AGAAGCAT
436:AGAAGGCC
437:AGACTTCC
438:AGACTCTT
439:AGACATGG
440:AGACCATA
441:AGACGCCA
442:AGAGATCT
443:AGAGACGC
444:AGAGGTTC
445:AGCTTAGA
446:AGCTATAC
447:AGCTGGTA
448:AGCATCCG
449:AGCAAGAA
450:AGCACACA
451:AGCCTTAA
452:AGCCACTA
453:AGCCGTGT
454:AGCGTAAT
455:AGCGCTGA
456:AGGTTCCT
457:AGGTCTTA
458:AGGTGTAT
459:AGGATATG
460:AGGACCAA
461:AGGACGTT
462:AGGAGTCA
463:AGGCGATC
464:CTTATACG
465:CTTAACAG
466:CTTACTTC
467:CTTACGAA
468:CTTAGTGA
469:CTTAGGCT
470:CTTCTAGA
471:CTTCTCAT
472:CTTCACCA
473:CTTCCTCG
474:CTTCGATC
475:CTTGTGTC
476:CTTGACGC
477:CTTGCACT
478:CTATACAC
479:CTATCTGG
480:CTATCGCT
481:CTATGGTA
482:CTAACCTA
483:CTAAGACC
484:CTACCGAC
485:CTACGTTG
486:CTAGTTCA
487:CTAGTAGG
488:CTAGACTT
489:CTAGAGAG
490:CTCTTACA
491:CTCTATGT
492:CTCTGTCC
493:CTCTGGAG
494:CTCATTGG
495:CTCAACTC
496:CTCACATT
497:CTCCTGAA
498:CTCCAAGG
499:CTCGATTA
500:CTCGAACC
501:CTCGCTAC
502:CTGTTGAC
503:CTGTAAGA
504:CTGTCCAT
505:CTGTGATT
506:CTGATCTT
507:CTGAATAC
508:CTGACACA
509:CTGAGTCG
510:CTGCTGGT
511:CTGCGTAT
512:CTGGCTGT
513:CATTAGCT
514:CATTCACA
515:CATTCGGC
516:CATTGCAT
517:CATATGGA
518:CATACTCT
519:CATAGAAC
520:CATAGGTG
521:CATCTGTT
522:CATCAACG
523:CATCGAGT
524:CATGTTCC
525:CATGTCTA
526:CATGATAG
527:CAATTCGA
528:CAATATGC
529:CAATCAGT
530:CAATCCTC
531:CAATGAAG
532:CAACTTCT
533:CAACAGCA
534:CAAGACAA
535:CAAGCTTA
536:CAAGGTAC
537:CACTACTG
538:CACTCTCG
539:CACTCGTT
540:CACTGAGA
541:CACATAAG
542:CACAACCT
543:CACACGAC
544:CACCATAC
545:CACCAATT
546:CACCGCTA
547:CACGTGAT
548:CACGGTTG
549:CAGTTGTA
550:CAGTATCA
551:CAGATCGC
552:CAGAACTA
553:CAGAAGGT
554:CAGAGTAA
555:CAGCTCAA
556:CAGCAAGC
557:CAGCCTTC
558:CAGCGACA
559:CAGGCAAT
560:CCTTAATG
561:CCTTCAAC
562:CCTATTGT
563:CCTATGAC
564:CCTAATCA
565:CCTCTACC
566:CCTCATAT
567:CCTCGCAA
568:CCTGATTC
569:CCTGCTGA
570:CCATTACG
571:CCATACCA
572:CCATAGTT
573:CCATGTAT
574:CCAATTAG
575:CCAATGCA
576:CCAACATG
577:CCAACCGT
578:CCAAGAGA
579:CCACTATT
580:CCACATCG
581:CCACCACA
582:CCAGTGTG
583:CCAGCTCT
584:CCAGGATC
585:CCGTTAGT
586:CCGTCGAA
587:CCGATATA
588:CCGAGTTC
589:CCGCTTCA
590:CCGCACTT
591:CCGGTAAG
592:CGTTATCC
593:CGTTACAA
594:CGTTCCTT
595:CGTTCGAG
596:CGTAAGTT
597:CGTACAGG
598:CGTAGTAT
599:CGTCTTGG
600:CGTCAGAC
601:CGTCCAAT
602:CGTGTCGT
603:CGTGAGGA
604:CGATTCAG
605:CGATAACT
606:CGAATATC
607:CGAACTCC
608:CGACTGAT
609:CGACATTA
610:CGACACGT
611:CGAGCTAG
612:CGAGGTGT
613:CGCTAATA
614:CGCTCTAT
615:CGCATTCT
616:CGCAGTTA
617:CGCGTCAA
618:CGCGGATT
619:CGGTATTG
620:CGGCATCT
621:CGGCCTAA
622:GTTATCGA
623:GTTACAGT
624:GTTACGCC
625:GTTAGCTT
626:GTTCTACT
627:GTTCACGT
628:GTTCCTAA
629:GTTCGTGC
630:GTTCGGTA
631:GTTGTCCG
632:GTTGATAC
633:GTTGAGCA
634:GTTGCCAT
635:GTTGGATG
636:GTATGCAT
637:GTATGGCC
638:GTAACCGG
639:GTAAGTCA
640:GTACTTAC
641:GTACATGA
642:GTACCATT
643:GTAGTCTA
644:GTAGAACT
645:GTAGGTAG
646:GTCTCATA
647:GTCAATCT
648:GTCAGAGA
649:GTCCACAG
650:GTCGTAGC
651:GTCGAGGT
652:GTCGCTTG
653:GTGTTACG
654:GTGTAGTA
655:GTGTCAAC
656:GTGATCAG
657:GTGACTAT
658:GTGCTCTC
659:GTGCCAGA
660:GTGGTTAA
661:GTGGACGA
662:GATTCGAA
663:GATAATGG
664:GATCTATG
665:GATCACTA
666:GATCCAAC
667:GATCCGGT
668:GATGTTGT
669:GATGTACA
670:GATGGAAT
671:GAATTAGC
672:GAATTCCT
673:GAATACGG
674:GAATCATG
675:GAATGCTA
676:GAACAACC
677:GAACAGTG
678:GAACCTGC
679:GAACGTAT
680:GAAGATCG
681:GAAGAGAT
682:GAAGCCAC
683:GAAGGTGA
684:GACTTCAA
685:GACTAGTC
686:GACTGTGC
687:GACACACT
688:GACAGCTG
689:GACCTTGA
690:GACCTAAT
691:GACGTCTC
692:GACGATAA
693:GACGAAGG
694:GAGTATGT
695:GAGTGATC
696:GAGAACCG
697:GAGACAAG
698:GAGAGCAC
699:GAGCTGAC
700:GAGCAGGA
701:GAGGCATA
702:GCTTCTGC
703:GCTTGGTG
704:GCTAACAA
705:GCTACACG
706:GCTAGGCA
707:GCTCTCAC
708:GCTCAAGC
709:GCTCCTCT
710:GCATATTG
711:GCATAAGA
712:GCATCAAT
713:GCATCGTC
714:GCAAGTGT
715:GCAAGCTC
716:GCACTCCA
717:GCACCGAA
718:GCAGTAGT
719:GCAGTGAC
720:GCCTTACT
721:GCCTTGGA
722:GCCTATCC
723:GCCTAGAG
724:GCCATTCA
725:GCCATATG
726:GCCAACTT
727:GCGTTGAT
728:GCGTATAA
729:GCGATTGC
730:GCGACATC
731:GCGAGAAT
732:GCGCAATG
733:GCGGTCTT
734:GGTTATAG
735:GGTTACTC
736:GGTTCAGA
737:GGTTGCGT
738:GGTATTCC
739:GGTATGGT
740:GGTAACCT
741:GGTACCAG
742:GGTAGATA
743:GGTAGGAC
744:GGTCTGAA
745:GGTGTAGG
746:GGTGCATT
747:GGATTGTT
748:GGATATCA
749:GGATAGAC
750:GGAATTGA
751:GGAATAAG
752:GGAACAGC
753:GGACGATG
754:GGAGTTAT
755:GGCTAAGT
756:GGCTGTTG
757:GGCATGTA
758:GGCAATTC
759:GGCCAGTT
760:GGCGAACA
