# Supplementary material
Source: publisher figshare collection journal article supplement (https://plos.figshare.com/articles/dataset/_/121383)
Supplement: Supplementary file 1 [file 1 › File_S2.txt]

# This file contains the 10 nucleotide, edit distance 5 tags integrated
# to both fusion-style primers and TruSeq-style Illumina adapters using
# the add_tags_to_primers.py and add_tags_to_adapters.py programs that
# are part of the EDITTAG package.
#
# You can validate tags within this file using:
#
# python validate_edit_metric_tags.py \
#    --input supplementary-file-2.txt \
#    --section "10nt ed5" \
#    --verbose
#
# We designed the edit metric tags below by running the following for
# 10 nucleotides:
#
# design_edit_metric_tags.py --tag-length=10 \
#   --edit-distance=3 \
#   --no-polybase \
#   --gc \
#   --comp \
#   --min-and-greater \
#   --multiprocessing
#
# Be aware that this will take a LONG time (I think it was something
# like 10 days on an 8-core mac pro).
#
# Any content within this file is available for use under a
# Creative Commons Attribution 3.0 United States License:
#
# [1]: http://creativecommons.org/licenses/by/3.0/us/
#
# You can find the computer code used to generate and validate these 
# sequence tags at:
#
# https://github.com/faircloth-lab/edittag/

[10nt ed5]
Tag0:TTGTTGGCGG
Tag1:AACAACAACC
Tag2:AACAAGCCGA
Tag3:AACACACGTG
Tag4:AACACGGAAT
Tag5:AACAGTCTCT
Tag6:AACCAATAGG
Tag7:AACCATGCAC
Tag8:AACCGAGTTA
Tag9:AACCTCCGGT
Tag10:AATACCAGGA
Tag11:AATACTTCCG
Tag12:AATAGGTAGC
Tag13:AATCGAACCT
Tag14:AATCGGCGAA
Tag15:AATGCACTAC
Tag16:AATGCTGGTT
Tag17:AATTAAGGCC
Tag18:ACAACATGGT
Tag19:ACAACGCTTC
Tag20:ACAAGAGCAG
Tag21:ACACGTATGA
Tag22:ACACTCCAAG
Tag23:ACAGAAGACT
Tag24:ACAGATTCGC
Tag25:ACATGGTCCA
Tag26:ACCATTGTTG
Tag27:ACCGACACAA
Tag28:ACCGCCTATT
Tag29:ACCGGTAACG
Tag30:ACCGTGAGTC
Tag31:ACCTCTTGAA
Tag32:ACCTTACCTT
Tag33:AAGATCTGAG
Tag34:AAGCTTATCC
Tag35:AAGGCCGTCA
Tag36:AAGGTGCCTG
Tag37:AAGTCGTTGT
Tag38:ACTGGCTTGG
Tag39:ACTTAGAAGG
Tag40:ACTTCCGCAC
Tag41:AGAACCACAT
Tag42:AGAAGTGACC
Tag43:AGAATCGGTA
Tag44:AGAGGAAGTG
Tag45:ACGCAACTCG
Tag46:ACGGTTCTAA
Tag47:ACGTAGCGAT
Tag48:AGCTACTGTC
Tag49:AGCTCAACGA
Tag50:AGCTGTCATA
Tag51:AGGAGAATCA
Tag52:AGGCACAGCT
Tag53:AGGCGTGTAG
Tag54:AGTATAGCGC
Tag55:AGTCCGACTG
Tag56:AGTCCTTAAC
Tag57:ATATCCGTGG
Tag58:ATCCTAGGCG
Tag59:ATCTCGATAC
Tag60:ATGAGGCCAC
Tag61:ATGGAAGGAA
Tag62:ATTGACCGCG
Tag63:ATTGTGTTCC
Tag64:CAACCTAACA
Tag65:CAACTGGAGG
Tag66:CAAGAAGTTC
Tag67:CAAGGACAAT
Tag68:CAAGGTTGGA
Tag69:CCGAACAGTG
Tag70:CCGAATGCCA
Tag71:CCGACTAAGC
Tag72:CCGAGGTCTT
Tag73:CCGCCGTTAA
Tag74:CCGGTGGAAT
Tag75:CATTCCTCTA
Tag76:CATTGAGTGT
Tag77:CCACAATCAT
Tag78:CCACCTTGTC
Tag79:CCAGCACCTA
Tag80:CCATATGAAC
Tag81:CCATCGCAGT
Tag82:CGCTTAATTG
Tag83:CGCTTGGACA
Tag84:CGGAACTTAT
Tag85:CGGATGAGGA
Tag86:CGGTAACACC
Tag87:CGGTCATGTT
Tag88:CGTAATCCGG
Tag89:CGTAGTATAC
Tag90:CGTCAAGAAG
Tag91:CGTCTCGTGA
Tag92:CGATAGGCTG
Tag93:CGCCAGCATT
Tag94:CACTCTGCCT
Tag95:CCGTTCTTCC
Tag96:CCTGTTAGCT
Tag97:CCTTGTCGAG
Tag98:CGTGCCAATC
Tag99:CTAACGATCG
Tag100:CTACAACGGC
Tag101:CTACGTGATT
Tag102:CTATGCTAAG
Tag103:CTGGACTCTC
Tag104:CTGGTTCCGT
Tag105:CTTAGCTGCA
Tag106:CTTATTGGTC
Tag107:CTTCCATAGT
Tag108:CTTCTACCAA
Tag109:GATCACATCA
Tag110:GATGATCAGT
Tag111:GATGGAGACG
Tag112:GATTCGCCAG
Tag113:GCAATTACCG
Tag114:GCACTAGATA
Tag115:GAACTCTCGC
Tag116:GACCTATTCT
Tag117:GCAGGCGTAT
Tag118:GCCTTCAGGA
Tag119:GAGAGTACTA
Tag120:GAGGAATAAC
Tag121:GAGTTGGATC
Tag122:GGCATCCTAA
Tag123:GGCGAAGGTT
Tag124:GGCGGATTGA
Tag125:GGCGTTACAT
Tag126:GCTAAGTCAC
Tag127:GCTCCTCTTG
Tag128:GGTACGCTCT
Tag129:GGTGCAGCAA
Tag130:GGTTGTGGCT
Tag131:GTAACTCGTT
Tag132:GTAAGCGAGA
Tag133:GGAAGACCTC
Tag134:GGAGCTATGG
Tag135:GGATACAAGC
Tag136:GTTCATGACC
Tag137:GTTCGGTATA
Tag138:GTTGCCACCT
Tag139:TAAGAGCGCC
Tag140:GTGAGATGAT
Tag141:GTGCACTGGA
Tag142:GTGTACCATG
Tag143:TAGCGGCACT
Tag144:TAGGCATCGG
Tag145:TAGTGATGCA
Tag146:TACGAGGTGG
Tag147:TCCAATACTC
Tag148:TCCAGGAAGA
Tag149:TCCTCACTGG
Tag150:TCGATCAACT
Tag151:TCGCTGAGAG
Tag152:TTGGCCAAGA
Tag153:TTGGCGGTTC
Tag154:TTGTCTCGAC
Tag155:TGTGGTTATG
Tag156:TGTTACCTAC
Tag157:TTAAGCCTTG
Tag158:TTACAGTACG
Tag159:TCTCGACGTT
Tag160:TGACGTCGCA
Tag161:TGTCATTCCT
Tag162:TTCGGAGCAC
Tag163:TTCTCCTTCA
