# Supplementary material
Source: publisher figshare collection journal article supplement (https://plos.figshare.com/articles/dataset/_/121383)
Supplement: Supplementary file 1 [file 1 › File_S3.xlsx]

## Sheet: Description
This file contains primers amplifying rbcL from Kress et al. 2009. These have been tagged with 10 nucleotide, edit distance 5 sequence tags designed by EDITTAG (https://github.com/faircloth-lab/edittag) and applied to primers using the add_tags_to_primers.py program, which uses Primer3 to integrate tags to each primer pair, outputting Tm and 2ndary structure information. The call to run the progr…

## Sheet: rbcLa_tagged_with_A_10_nt_tags.
original id	section	unmodified	tag	cycles	left_tag_common	left_tag	left_sequence	left_tm	left_gc	left_self_end	left_self_any	left_hairpin	left_end_stability	left_penalty	left_problems	right_tag_common	right_tag	right_sequence	right_tm	right_gc	right_self_end	right_self_any	right_hairpin	right_end_stability	right_penalty	right_problems	pair_compl_end	pair_compl_any	pair_hairpin_either	pair_penalty
1	None	1	None	0	None	None	ATGTCACCACAAACAGAGACTAAAGC	62.456	42.308	0	0	31.2	3.51	8.45576	None	None	None	GTAAAATCAAGTCCACCACG	55.37	45	0	0	0	4.94	4.63029	Temperature too low; Contains too-long poly nucleotide tract;	0	0	0	13.0861
121	10nt ed5	0	GAGAGTACTA	25	GAGAGTACTA	GAGAGTACTA	GAGAGTACTAATGTCACCACAAACAGAGACTAAAGC	67.163	41.667	0	0	31.2	3.51	23.1627	Temperature too high;	GAGAGTACTA	GAGAGTACTA	GAGAGTACTAGTAAAATCAAGTCCACCACG	63.852	43.333	0	0	0	4.94	13.8518	Temperature too high; Contains too-long poly nucleotide tract;	0	0	0	37.0145
118	10nt ed5	0	GACCTATTCT	21	GACCTATTCT	GACCTATTCT	GACCTATTCTATGTCACCACAAACAGAGACTAAAGC	67.229	41.667	0	0	35.66	3.51	23.2291	Temperature too high;	GACCTATTCT	GACCTATTCT	GACCTATTCTGTAAAATCAAGTCCACCACG	64.669	43.333	0	0	0	4.94	14.6694	Temperature too high; Contains too-long poly nucleotide tract;	0	0	0	37.8985
77	10nt ed5	0	CATTCCTCTA	20	CATTCCTCTA	CATTCCTCTA	CATTCCTCTAATGTCACCACAAACAGAGACTAAAGC	67.701	41.667	0	0	36.03	3.51	23.7013	Temperature too high;	CATTCCTCTA	CATTCCTCTA	CATTCCTCTAGTAAAATCAAGTCCACCACG	64.486	43.333	0	0	0	4.94	14.4863	Temperature too high; Contains too-long poly nucleotide tract;	0	0	0	38.1877
116	10nt ed5	0	GCACTAGATA	24	GCACTAGATA	GCACTAGATA	GCACTAGATAATGTCACCACAAACAGAGACTAAAGC	67.707	41.667	0	0	31.2	3.51	23.707	Temperature too high;	GCACTAGATA	GCACTAGATA	GCACTAGATAGTAAAATCAAGTCCACCACG	64.511	43.333	0	0	26.41	4.94	14.5107	Temperature too high; Contains too-long poly nucleotide tract;	0	0	0	38.2177
109	10nt ed5	0	CTTCCATAGT	21	CTTCCATAGT	CTTCCATAGT	CTTCCATAGTATGTCACCACAAACAGAGACTAAAGC	67.386	41.667	0	0	29.62	3.51	23.3858	Temperature too high;	CTTCCATAGT	CTTCCATAGT	CTTCCATAGTGTAAAATCAAGTCCACCACG	64.858	43.333	0	0	0	4.94	14.8578	Temperature too high; Contains too-long poly nucleotide tract;	0	0	0	38.2436
104	10nt ed5	0	CTATGCTAAG	23	CTATGCTAAG	CTATGCTAAG	CTATGCTAAGATGTCACCACAAACAGAGACTAAAGC	67.559	41.667	0.54	0.54	31.2	3.51	23.5593	Temperature too high;	CTATGCTAAG	CTATGCTAAG	CTATGCTAAGGTAAAATCAAGTCCACCACG	64.718	43.333	0	0	0	4.94	14.718	Temperature too high; Contains too-long poly nucleotide tract;	0	0	0	38.2774
139	10nt ed5	0	GTTCGGTATA	23	GTTCGGTATA	GTTCGGTATA	GTTCGGTATAATGTCACCACAAACAGAGACTAAAGC	67.843	41.667	0	0	31.2	3.51	23.8432	Temperature too high;	GTTCGGTATA	GTTCGGTATA	GTTCGGTATAGTAAAATCAAGTCCACCACG	64.685	43.333	0	0	0	4.94	14.685	Temperature too high; Contains too-long poly nucleotide tract;	0	0	0	38.5282
112	10nt ed5	0	GATGATCAGT	24	GATGATCAGT	GATGATCAGT	GATGATCAGTATGTCACCACAAACAGAGACTAAAGC	67.559	41.667	0	0	29.62	3.51	23.5593	Temperature too high;	GATGATCAGT	GATGATCAGT	GATGATCAGTGTAAAATCAAGTCCACCACG	65.076	43.333	0	0	29.02	4.94	15.0755	Temperature too high; Contains too-long poly nucleotide tract;	0	0	0	38.6349
110	10nt ed5	0	CTTCTACCAA	21	CTTCTACCAA	CTTCTACCAA	CTTCTACCAAATGTCACCACAAACAGAGACTAAAGC	67.964	41.667	0	0	31.2	3.51	23.964	Temperature too high;	CTTCTACCAA	CTTCTACCAA	CTTCTACCAAGTAAAATCAAGTCCACCACG	64.809	43.333	0	0	0	4.94	14.8093	Temperature too high; Contains too-long poly nucleotide tract;	0	0	0	38.7732
122	10nt ed5	0	GAGGAATAAC	26	GAGGAATAAC	GAGGAATAAC	GAGGAATAACATGTCACCACAAACAGAGACTAAAGC	67.849	41.667	0	0	31.2	3.51	23.8492	Temperature too high;	GAGGAATAAC	GAGGAATAAC	GAGGAATAACGTAAAATCAAGTCCACCACG	65.061	43.333	0	0	0	4.94	15.0609	Temperature too high; Contains too-long poly nucleotide tract;	0	0	0	38.9101
86	10nt ed5	0	CGGAACTTAT	23	CGGAACTTAT	CGGAACTTAT	CGGAACTTATATGTCACCACAAACAGAGACTAAAGC	67.696	41.667	0	8.68	31.2	3.51	23.6962	Temperature too high;	CGGAACTTAT	CGGAACTTAT	CGGAACTTATGTAAAATCAAGTCCACCACG	65.247	43.333	0	0.25	0	4.94	15.2475	Temperature too high; Contains too-long poly nucleotide tract;	0	1.32	0	38.9437
133	10nt ed5	0	GTAACTCGTT	22	GTAACTCGTT	GTAACTCGTT	GTAACTCGTTATGTCACCACAAACAGAGACTAAAGC	67.775	41.667	0	7.07	31.2	3.51	23.7751	Temperature too high;	GTAACTCGTT	GTAACTCGTT	GTAACTCGTTGTAAAATCAAGTCCACCACG	65.357	43.333	0	0	0	4.94	15.3568	Temperature too high; Contains too-long poly nucleotide tract;	0	0	0	39.132
111	10nt ed5	0	GATCACATCA	23	GATCACATCA	GATCACATCA	GATCACATCAATGTCACCACAAACAGAGACTAAAGC	68.176	41.667	0	0	34.99	3.51	24.1758	Temperature too high;	GATCACATCA	GATCACATCA	GATCACATCAGTAAAATCAAGTCCACCACG	65.076	43.333	0	0	0	4.94	15.0755	Temperature too high; Contains too-long poly nucleotide tract;	0	0	0	39.2513
82	10nt ed5	0	CCATATGAAC	23	CCATATGAAC	CCATATGAAC	CCATATGAACATGTCACCACAAACAGAGACTAAAGC	68.046	41.667	0	0.44	35.09	3.51	24.0461	Temperature too high;	CCATATGAAC	CCATATGAAC	CCATATGAACGTAAAATCAAGTCCACCACG	65.296	43.333	0	0.44	0	4.94	15.2957	Temperature too high; Contains too-long poly nucleotide tract;	0	0.44	0	39.3418
66	10nt ed5	0	CAACCTAACA	23	CAACCTAACA	CAACCTAACA	CAACCTAACAATGTCACCACAAACAGAGACTAAAGC	68.266	41.667	0	0	31.2	3.51	24.2664	Temperature too high;	CAACCTAACA	CAACCTAACA	CAACCTAACAGTAAAATCAAGTCCACCACG	65.179	43.333	0	0	0	4.94	15.1788	Temperature too high; Contains too-long poly nucleotide tract;	0	0	0	39.4451
78	10nt ed5	0	CATTGAGTGT	23	CATTGAGTGT	CATTGAGTGT	CATTGAGTGTATGTCACCACAAACAGAGACTAAAGC	67.977	41.667	0	5.19	36.21	3.51	23.9769	Temperature too high;	CATTGAGTGT	CATTGAGTGT	CATTGAGTGTGTAAAATCAAGTCCACCACG	65.581	43.333	0	0	0	4.94	15.5808	Temperature too high; Contains too-long poly nucleotide tract;	0	0	0	39.5577
79	10nt ed5	0	CCACAATCAT	22	CCACAATCAT	CCACAATCAT	CCACAATCATATGTCACCACAAACAGAGACTAAAGC	68.046	41.667	0	0	31.2	3.51	24.0461	Temperature too high;	CCACAATCAT	CCACAATCAT	CCACAATCATGTAAAATCAAGTCCACCACG	65.653	43.333	0	0	32.98	4.94	15.6525	Temperature too high; Contains too-long poly nucleotide tract;	0	0	0	39.6986
68	10nt ed5	0	CAAGAAGTTC	24	CAAGAAGTTC	CAAGAAGTTC	CAAGAAGTTCATGTCACCACAAACAGAGACTAAAGC	68.249	41.667	0	0	31.2	3.51	24.2489	Temperature too high;	CAAGAAGTTC	CAAGAAGTTC	CAAGAAGTTCGTAAAATCAAGTCCACCACG	65.551	43.333	0	0	0	4.94	15.551	Temperature too high; Contains too-long poly nucleotide tract;	0	0	0	39.7999
41	10nt ed5	0	ACTTAGAAGG	25	ACTTAGAAGG	ACTTAGAAGG	ACTTAGAAGGATGTCACCACAAACAGAGACTAAAGC	68.37	41.667	0	0	31.2	3.51	24.3695	Temperature too high;	ACTTAGAAGG	ACTTAGAAGG	ACTTAGAAGGGTAAAATCAAGTCCACCACG	65.652	43.333	0	0	0	4.94	15.6518	Temperature too high; Contains too-long poly nucleotide tract;	0	0	0	40.0214
35	10nt ed5	0	AAGATCTGAG	25	AAGATCTGAG	AAGATCTGAG	AAGATCTGAGATGTCACCACAAACAGAGACTAAAGC	68.393	41.667	0	8.14	35.47	3.51	24.3931	Temperature too high;	AAGATCTGAG	AAGATCTGAG	AAGATCTGAGGTAAAATCAAGTCCACCACG	65.687	43.333	0	0	0	4.94	15.6868	Temperature too high; Contains too-long poly nucleotide tract;	0	0	0	40.0799
61	10nt ed5	0	ATCTCGATAC	22	ATCTCGATAC	ATCTCGATAC	ATCTCGATACATGTCACCACAAACAGAGACTAAAGC	68.425	41.667	0	0	31.2	3.51	24.425	Temperature too high;	ATCTCGATAC	ATCTCGATAC	ATCTCGATACGTAAAATCAAGTCCACCACG	65.738	43.333	0	0	0	4.94	15.7377	Temperature too high; Contains too-long poly nucleotide tract;	0	0	0	40.1626
160	10nt ed5	0	TTACAGTACG	23	TTACAGTACG	TTACAGTACG	TTACAGTACGATGTCACCACAAACAGAGACTAAAGC	68.474	41.667	0	0	31.2	3.51	24.4744	Temperature too high;	TTACAGTACG	TTACAGTACG	TTACAGTACGGTAAAATCAAGTCCACCACG	65.815	43.333	0	9.94	26.04	4.94	15.8151	Temperature too high; Contains too-long poly nucleotide tract;	0	0	0	40.2895
158	10nt ed5	0	TGTTACCTAC	21	TGTTACCTAC	TGTTACCTAC	TGTTACCTACATGTCACCACAAACAGAGACTAAAGC	68.502	41.667	0	3.85	31.2	3.51	24.5023	Temperature too high;	TGTTACCTAC	TGTTACCTAC	TGTTACCTACGTAAAATCAAGTCCACCACG	65.815	43.333	0	0	31.35	4.94	15.8151	Temperature too high; Contains too-long poly nucleotide tract;	0	0	0	40.3174
84	10nt ed5	0	CGCTTAATTG	22	CGCTTAATTG	CGCTTAATTG	CGCTTAATTGATGTCACCACAAACAGAGACTAAAGC	68.479	41.667	0	0	31.2	3.51	24.4787	Temperature too high;	CGCTTAATTG	CGCTTAATTG	CGCTTAATTGGTAAAATCAAGTCCACCACG	65.849	43.333	0	0	0	4.94	15.849	Temperature too high; Contains too-long poly nucleotide tract;	0	0	0	40.3278
34	10nt ed5	0	ACCTTACCTT	20	ACCTTACCTT	ACCTTACCTT	ACCTTACCTTATGTCACCACAAACAGAGACTAAAGC	68.387	41.667	0	0	31.2	3.51	24.3875	Temperature too high;	ACCTTACCTT	ACCTTACCTT	ACCTTACCTTGTAAAATCAAGTCCACCACG	66.024	43.333	0	0	38.29	4.94	16.0242	Temperature too high; Contains too-long poly nucleotide tract;	0	0	0	40.4117
45	10nt ed5	0	AGAATCGGTA	25	AGAATCGGTA	AGAATCGGTA	AGAATCGGTAATGTCACCACAAACAGAGACTAAAGC	68.717	41.667	0	0	34.68	3.51	24.7167	Temperature too high;	AGAATCGGTA	AGAATCGGTA	AGAATCGGTAGTAAAATCAAGTCCACCACG	65.695	43.333	0	0	0	4.94	15.6952	Temperature too high; Contains too-long poly nucleotide tract;	0	0	0	40.4119
53	10nt ed5	0	AGGAGAATCA	26	AGGAGAATCA	AGGAGAATCA	AGGAGAATCAATGTCACCACAAACAGAGACTAAAGC	68.728	41.667	0	0	31.2	3.51	24.7281	Temperature too high;	AGGAGAATCA	AGGAGAATCA	AGGAGAATCAGTAAAATCAAGTCCACCACG	65.687	43.333	0	0	0	4.94	15.6868	Temperature too high; Contains too-long poly nucleotide tract;	0	0	0	40.4148
149	10nt ed5	0	TCCAATACTC	21	TCCAATACTC	TCCAATACTC	TCCAATACTCATGTCACCACAAACAGAGACTAAAGC	68.556	41.667	0	0	31.2	3.51	24.5559	Temperature too high;	TCCAATACTC	TCCAATACTC	TCCAATACTCGTAAAATCAAGTCCACCACG	65.874	43.333	0	0	0	4.94	15.8736	Temperature too high; Contains too-long poly nucleotide tract;	0	0	0	40.4295
12	10nt ed5	0	AATACCAGGA	25	AATACCAGGA	AATACCAGGA	AATACCAGGAATGTCACCACAAACAGAGACTAAAGC	68.747	41.667	0	0	31.2	3.51	24.7468	Temperature too high;	AATACCAGGA	AATACCAGGA	AATACCAGGAGTAAAATCAAGTCCACCACG	65.701	43.333	0	0	34.39	4.94	15.7012	Temperature too high; Contains too-long poly nucleotide tract;	0	0	0	40.448
14	10nt ed5	0	AATAGGTAGC	25	AATAGGTAGC	AATAGGTAGC	AATAGGTAGCATGTCACCACAAACAGAGACTAAAGC	68.6	41.667	0	9.4	31.2	3.51	24.6004	Temperature too high;	AATAGGTAGC	AATAGGTAGC	AATAGGTAGCGTAAAATCAAGTCCACCACG	65.925	43.333	0	0	0	4.94	15.9249	Temperature too high; Contains too-long poly nucleotide tract;	0	0	0	40.5253
165	10nt ed5	0	TTCTCCTTCA	19	TTCTCCTTCA	TTCTCCTTCA	TTCTCCTTCAATGTCACCACAAACAGAGACTAAAGC	68.831	41.667	0	0	31.2	3.51	24.8306	Temperature too high;	TTCTCCTTCA	TTCTCCTTCA	TTCTCCTTCAGTAAAATCAAGTCCACCACG	65.817	43.333	0	0	0	4.94	15.8174	Temperature too high; Contains too-long poly nucleotide tract;	0	0	0	40.648
58	10nt ed5	0	AGTCCTTAAC	22	AGTCCTTAAC	AGTCCTTAAC	AGTCCTTAACATGTCACCACAAACAGAGACTAAAGC	68.674	41.667	0	0	31.2	3.51	24.6741	Temperature too high;	AGTCCTTAAC	AGTCCTTAAC	AGTCCTTAACGTAAAATCAAGTCCACCACG	66.015	43.333	0	0	0	4.94	16.0151	Temperature too high; Contains too-long poly nucleotide tract;	0	0	0	40.6892
152	10nt ed5	0	TCGATCAACT	22	TCGATCAACT	TCGATCAACT	TCGATCAACTATGTCACCACAAACAGAGACTAAAGC	68.527	41.667	0	0	31.38	3.51	24.5275	Temperature too high;	TCGATCAACT	TCGATCAACT	TCGATCAACTGTAAAATCAAGTCCACCACG	66.225	43.333	0	0	0	4.94	16.2253	Temperature too high; Contains too-long poly nucleotide tract;	0	0	0	40.7528
52	10nt ed5	0	AGCTGTCATA	23	AGCTGTCATA	AGCTGTCATA	AGCTGTCATAATGTCACCACAAACAGAGACTAAAGC	68.885	41.667	0	0	31.2	3.51	24.8851	Temperature too high;	AGCTGTCATA	AGCTGTCATA	AGCTGTCATAGTAAAATCAAGTCCACCACG	65.893	43.333	0	0	0	4.94	15.8933	Temperature too high; Contains too-long poly nucleotide tract;	0	0	0	40.7784
163	10nt ed5	0	TGTCATTCCT	20	TGTCATTCCT	TGTCATTCCT	TGTCATTCCTATGTCACCACAAACAGAGACTAAAGC	68.556	41.667	0	0	31.38	3.51	24.5559	Temperature too high;	TGTCATTCCT	TGTCATTCCT	TGTCATTCCTGTAAAATCAAGTCCACCACG	66.237	43.333	0	0	0	4.94	16.2365	Temperature too high; Contains too-long poly nucleotide tract;	0	0	0	40.7924
13	10nt ed5	0	AATACTTCCG	22	AATACTTCCG	AATACTTCCG	AATACTTCCGATGTCACCACAAACAGAGACTAAAGC	68.717	41.667	0	0	31.2	3.51	24.7167	Temperature too high;	AATACTTCCG	AATACTTCCG	AATACTTCCGGTAAAATCAAGTCCACCACG	66.089	43.333	0	0.58	30.22	4.94	16.0894	Temperature too high; Contains too-long poly nucleotide tract;	0	0	0	40.8061
48	10nt ed5	0	ACGGTTCTAA	23	ACGGTTCTAA	ACGGTTCTAA	ACGGTTCTAAATGTCACCACAAACAGAGACTAAAGC	68.977	41.667	0	0	31.2	3.51	24.9772	Temperature too high;	ACGGTTCTAA	ACGGTTCTAA	ACGGTTCTAAGTAAAATCAAGTCCACCACG	66.015	43.333	0	0	0	4.94	16.0151	Temperature too high; Contains too-long poly nucleotide tract;	0	0	0	40.9923
10	10nt ed5	0	AACCGAGTTA	24	AACCGAGTTA	AACCGAGTTA	AACCGAGTTAATGTCACCACAAACAGAGACTAAAGC	68.977	41.667	0	0	31.2	3.51	24.9772	Temperature too high;	AACCGAGTTA	AACCGAGTTA	AACCGAGTTAGTAAAATCAAGTCCACCACG	66.015	43.333	0	0	25.51	4.94	16.0151	Temperature too high; Contains too-long poly nucleotide tract;	0	0	0	40.9923
23	10nt ed5	0	ACACGTATGA	24	ACACGTATGA	ACACGTATGA	ACACGTATGAATGTCACCACAAACAGAGACTAAAGC	68.987	41.667	0	0	31.2	3.51	24.9866	Temperature too high;	ACACGTATGA	ACACGTATGA	ACACGTATGAGTAAAATCAAGTCCACCACG	66.039	43.333	0	0	27.77	4.94	16.0386	Temperature too high; Contains too-long poly nucleotide tract;	0	0	0	41.0252
157	10nt ed5	0	TGTGGTTATG	23	TGTGGTTATG	TGTGGTTATG	TGTGGTTATGATGTCACCACAAACAGAGACTAAAGC	68.859	41.667	0	14.16	37.4	3.51	24.8595	Temperature too high;	TGTGGTTATG	TGTGGTTATG	TGTGGTTATGGTAAAATCAAGTCCACCACG	66.252	43.333	0	4.62	36.44	4.94	16.2523	Temperature too high; Contains too-long poly nucleotide tract;	12.42	15.68	0	41.1118
43	10nt ed5	0	AGAACCACAT	24	AGAACCACAT	AGAACCACAT	AGAACCACATATGTCACCACAAACAGAGACTAAAGC	68.716	41.667	0	0	31.2	3.51	24.7156	Temperature too high;	AGAACCACAT	AGAACCACAT	AGAACCACATGTAAAATCAAGTCCACCACG	66.428	43.333	0	0.39	0	4.94	16.4275	Temperature too high; Contains too-long poly nucleotide tract;	0	0	0	41.1431
63	10nt ed5	0	ATGGAAGGAA	27	ATGGAAGGAA	ATGGAAGGAA	ATGGAAGGAAATGTCACCACAAACAGAGACTAAAGC	69.064	41.667	0	0	31.2	3.51	25.0639	Temperature too high;	ATGGAAGGAA	ATGGAAGGAA	ATGGAAGGAAGTAAAATCAAGTCCACCACG	66.084	43.333	0	0.71	25.53	4.94	16.0838	Temperature too high; Contains too-long poly nucleotide tract;	0	0	0	41.1477
15	10nt ed5	0	AATCGAACCT	23	AATCGAACCT	AATCGAACCT	AATCGAACCTATGTCACCACAAACAGAGACTAAAGC	68.717	41.667	0	0	31.38	3.51	24.7167	Temperature too high;	AATCGAACCT	AATCGAACCT	AATCGAACCTGTAAAATCAAGTCCACCACG	66.441	43.333	0	0	0	4.94	16.4413	Temperature too high; Contains too-long poly nucleotide tract;	0	0	0	41.158
36	10nt ed5	0	AAGCTTATCC	22	AAGCTTATCC	AAGCTTATCC	AAGCTTATCCATGTCACCACAAACAGAGACTAAAGC	68.917	41.667	5.42	5.42	31.2	3.51	24.9167	Temperature too high;	AAGCTTATCC	AAGCTTATCC	AAGCTTATCCGTAAAATCAAGTCCACCACG	66.303	43.333	0	0	0	4.94	16.3028	Temperature too high; Contains too-long poly nucleotide tract;	0.21	0	0	41.2196
159	10nt ed5	0	TTAAGCCTTG	22	TTAAGCCTTG	TTAAGCCTTG	TTAAGCCTTGATGTCACCACAAACAGAGACTAAAGC	69.019	41.667	0	0	31.2	3.51	25.0188	Temperature too high;	TTAAGCCTTG	TTAAGCCTTG	TTAAGCCTTGGTAAAATCAAGTCCACCACG	66.444	43.333	0	0	35.92	4.94	16.4438	Temperature too high; Contains too-long poly nucleotide tract;	0	4.51	0	41.4626
101	10nt ed5	0	CTAACGATCG	25	CTAACGATCG	CTAACGATCG	CTAACGATCGATGTCACCACAAACAGAGACTAAAGC	69.008	44.444	0	7.2	31.2	3.51	25.0082	Temperature too high;	CTAACGATCG	CTAACGATCG	CTAACGATCGGTAAAATCAAGTCCACCACG	66.49	46.667	0	0	0	4.94	16.4899	Temperature too high; Contains too-long poly nucleotide tract;	0	0	0	41.4981
98	10nt ed5	0	CCTGTTAGCT	23	CCTGTTAGCT	CCTGTTAGCT	CCTGTTAGCTATGTCACCACAAACAGAGACTAAAGC	68.885	44.444	1.86	6.82	37.01	3.51	24.8854	Temperature too high;	CCTGTTAGCT	CCTGTTAGCT	CCTGTTAGCTGTAAAATCAAGTCCACCACG	66.652	46.667	0	0	0	4.94	16.6521	Temperature too high; Contains too-long poly nucleotide tract;	0	0	0	41.5375
134	10nt ed5	0	GTAAGCGAGA	28	GTAAGCGAGA	GTAAGCGAGA	GTAAGCGAGAATGTCACCACAAACAGAGACTAAAGC	69.309	44.444	0	0	31.2	3.51	25.309	Temperature too high;	GTAAGCGAGA	GTAAGCGAGA	GTAAGCGAGAGTAAAATCAAGTCCACCACG	66.452	46.667	0	0	0	4.94	16.4525	Temperature too high; Contains too-long poly nucleotide tract;	0	0	0	41.7615
6	10nt ed5	0	AACACGGAAT	25	AACACGGAAT	AACACGGAAT	AACACGGAATATGTCACCACAAACAGAGACTAAAGC	69.018	41.667	0	0	31.2	3.51	25.0185	Temperature too high;	AACACGGAAT	AACACGGAAT	AACACGGAATGTAAAATCAAGTCCACCACG	66.807	43.333	0	0	37.06	4.94	16.8066	Temperature too high; Contains too-long poly nucleotide tract;	0	0	0	41.8251
17	10nt ed5	0	AATGCACTAC	23	AATGCACTAC	AATGCACTAC	AATGCACTACATGTCACCACAAACAGAGACTAAAGC	69.187	41.667	0	0	35.19	3.51	25.1867	Temperature too high;	AATGCACTAC	AATGCACTAC	AATGCACTACGTAAAATCAAGTCCACCACG	66.641	43.333	0	0	0	4.94	16.641	Temperature too high; Contains too-long poly nucleotide tract;	0	0	0	41.8277
144	10nt ed5	0	GTGTACCATG	25	GTGTACCATG	GTGTACCATG	GTGTACCATGATGTCACCACAAACAGAGACTAAAGC	69.186	44.444	0	0	31.2	3.51	25.1856	Temperature too high;	GTGTACCATG	GTGTACCATG	GTGTACCATGGTAAAATCAAGTCCACCACG	66.669	46.667	0	16.77	28.26	4.94	16.6688	Temperature too high; Contains too-long poly nucleotide tract;	8.91	5.61	0	41.8545
123	10nt ed5	0	GAGTTGGATC	26	GAGTTGGATC	GAGTTGGATC	GAGTTGGATCATGTCACCACAAACAGAGACTAAAGC	69.199	44.444	0	1.57	31.2	3.51	25.1986	Temperature too high;	GAGTTGGATC	GAGTTGGATC	GAGTTGGATCGTAAAATCAAGTCCACCACG	66.665	46.667	0	0	0	4.94	16.6646	Temperature too high; Contains too-long poly nucleotide tract;	0	0	0	41.8632
19	10nt ed5	0	AATTAAGGCC	24	AATTAAGGCC	AATTAAGGCC	AATTAAGGCCATGTCACCACAAACAGAGACTAAAGC	69.252	41.667	0	0	31.2	3.51	25.2523	Temperature too high;	AATTAAGGCC	AATTAAGGCC	AATTAAGGCCGTAAAATCAAGTCCACCACG	66.697	43.333	0	0	0	4.94	16.6969	Temperature too high; Contains too-long poly nucleotide tract;	0	0	0	41.9492
124	10nt ed5	0	GGCATCCTAA	25	GGCATCCTAA	GGCATCCTAA	GGCATCCTAAATGTCACCACAAACAGAGACTAAAGC	69.418	44.444	0	0	34.93	3.51	25.4178	Temperature too high;	GGCATCCTAA	GGCATCCTAA	GGCATCCTAAGTAAAATCAAGTCCACCACG	66.542	46.667	0	0	0	4.94	16.5418	Temperature too high; Contains too-long poly nucleotide tract;	0	0	0	41.9596
92	10nt ed5	0	CGTCAAGAAG	27	CGTCAAGAAG	CGTCAAGAAG	CGTCAAGAAGATGTCACCACAAACAGAGACTAAAGC	69.278	44.444	0	0	31.2	3.51	25.278	Temperature too high;	CGTCAAGAAG	CGTCAAGAAG	CGTCAAGAAGGTAAAATCAAGTCCACCACG	66.801	46.667	0	0	0	4.94	16.8013	Temperature too high; Contains too-long poly nucleotide tract;	0	0	0	42.0793
128	10nt ed5	0	GCTAAGTCAC	25	GCTAAGTCAC	GCTAAGTCAC	GCTAAGTCACATGTCACCACAAACAGAGACTAAAGC	69.311	44.444	10.23	10.23	31.2	3.51	25.3106	Temperature too high;	GCTAAGTCAC	GCTAAGTCAC	GCTAAGTCACGTAAAATCAAGTCCACCACG	66.813	46.667	0	0	0	4.94	16.8129	Temperature too high; Contains too-long poly nucleotide tract;	0	0	0	42.1235
65	10nt ed5	0	ATTGTGTTCC	21	ATTGTGTTCC	ATTGTGTTCC	ATTGTGTTCCATGTCACCACAAACAGAGACTAAAGC	69.334	41.667	0	8.84	26.89	3.51	25.3338	Temperature too high;	ATTGTGTTCC	ATTGTGTTCC	ATTGTGTTCCGTAAAATCAAGTCCACCACG	66.807	43.333	0	0	0	4.94	16.8066	Temperature too high; Contains too-long poly nucleotide tract;	0	0	0	42.1404
18	10nt ed5	0	AATGCTGGTT	23	AATGCTGGTT	AATGCTGGTT	AATGCTGGTTATGTCACCACAAACAGAGACTAAAGC	69.219	41.667	0	0	36.79	3.51	25.2194	Temperature too high;	AATGCTGGTT	AATGCTGGTT	AATGCTGGTTGTAAAATCAAGTCCACCACG	67.034	43.333	0	0	0	4.94	17.0342	Temperature too high; Contains too-long poly nucleotide tract;	1.23	2.76	0	42.2535
137	10nt ed5	0	GGATACAAGC	27	GGATACAAGC	GGATACAAGC	GGATACAAGCATGTCACCACAAACAGAGACTAAAGC	69.385	44.444	0	6.81	37.6	3.51	25.3846	Temperature too high;	GGATACAAGC	GGATACAAGC	GGATACAAGCGTAAAATCAAGTCCACCACG	66.889	46.667	0	0	0	4.94	16.8894	Temperature too high; Contains too-long poly nucleotide tract;	0	0	0	42.274
70	10nt ed5	0	CAAGGTTGGA	27	CAAGGTTGGA	CAAGGTTGGA	CAAGGTTGGAATGTCACCACAAACAGAGACTAAAGC	69.645	44.444	0	0	33.55	3.51	25.6451	Temperature too high;	CAAGGTTGGA	CAAGGTTGGA	CAAGGTTGGAGTAAAATCAAGTCCACCACG	66.818	46.667	2.07	9.55	38.96	4.94	16.8181	Temperature too high; Contains too-long poly nucleotide tract;	0	4.77	0	42.4631
107	10nt ed5	0	CTTAGCTGCA	24	CTTAGCTGCA	CTTAGCTGCA	CTTAGCTGCAATGTCACCACAAACAGAGACTAAAGC	69.663	44.444	0	0	31.2	3.51	25.6625	Temperature too high;	CTTAGCTGCA	CTTAGCTGCA	CTTAGCTGCAGTAAAATCAAGTCCACCACG	66.861	46.667	0	0	0	4.94	16.8611	Temperature too high; Contains too-long poly nucleotide tract;	0	0	0	42.5236
89	10nt ed5	0	CGGTCATGTT	24	CGGTCATGTT	CGGTCATGTT	CGGTCATGTTATGTCACCACAAACAGAGACTAAAGC	69.338	44.444	2.18	9.67	32.25	3.51	25.3384	Temperature too high;	CGGTCATGTT	CGGTCATGTT	CGGTCATGTTGTAAAATCAAGTCCACCACG	67.21	46.667	0	0	0	4.94	17.21	Temperature too high; Contains too-long poly nucleotide tract;	0	0	0	42.5485
127	10nt ed5	0	GGCGTTACAT	25	GGCGTTACAT	GGCGTTACAT	GGCGTTACATATGTCACCACAAACAGAGACTAAAGC	69.369	44.444	0	0.15	31.2	3.51	25.3695	Temperature too high;	GGCGTTACAT	GGCGTTACAT	GGCGTTACATGTAAAATCAAGTCCACCACG	67.249	46.667	5.04	7.01	0	4.94	17.2493	Temperature too high; Contains too-long poly nucleotide tract;	2.31	0	0	42.6188
3	10nt ed5	0	AACAACAACC	24	AACAACAACC	AACAACAACC	AACAACAACCATGTCACCACAAACAGAGACTAAAGC	69.593	41.667	0	0	34.62	3.51	25.5932	Temperature too high;	AACAACAACC	AACAACAACC	AACAACAACCGTAAAATCAAGTCCACCACG	67.121	43.333	0	0	0	4.94	17.1213	Temperature too high; Contains too-long poly nucleotide tract;	0	0	0	42.7145
115	10nt ed5	0	GCAATTACCG	25	GCAATTACCG	GCAATTACCG	GCAATTACCGATGTCACCACAAACAGAGACTAAAGC	69.68	44.444	0	0	31.2	3.51	25.6797	Temperature too high;	GCAATTACCG	GCAATTACCG	GCAATTACCGGTAAAATCAAGTCCACCACG	67.279	46.667	0	11.79	0	4.94	17.2795	Temperature too high; Contains too-long poly nucleotide tract;	0	0	0	42.9591
150	10nt ed5	0	TCCAGGAAGA	27	TCCAGGAAGA	TCCAGGAAGA	TCCAGGAAGAATGTCACCACAAACAGAGACTAAAGC	69.908	44.444	0	0	31.2	3.51	25.9084	Temperature too high;	TCCAGGAAGA	TCCAGGAAGA	TCCAGGAAGAGTAAAATCAAGTCCACCACG	67.097	46.667	0	0	0	4.94	17.0969	Temperature too high; Contains too-long poly nucleotide tract;	0	0	0	43.0053
50	10nt ed5	0	AGCTACTGTC	24	AGCTACTGTC	AGCTACTGTC	AGCTACTGTCATGTCACCACAAACAGAGACTAAAGC	69.883	44.444	10.47	10.47	39.87	3.51	25.8829	Temperature too high;	AGCTACTGTC	AGCTACTGTC	AGCTACTGTCGTAAAATCAAGTCCACCACG	67.462	46.667	0	0	0	4.94	17.4622	Temperature too high; Contains too-long poly nucleotide tract;	0	0	0	43.3451
24	10nt ed5	0	ACACTCCAAG	25	ACACTCCAAG	ACACTCCAAG	ACACTCCAAGATGTCACCACAAACAGAGACTAAAGC	70.032	44.444	0	0	31.2	3.51	26.0322	Temperature too high;	ACACTCCAAG	ACACTCCAAG	ACACTCCAAGGTAAAATCAAGTCCACCACG	67.656	46.667	0	0	0	4.94	17.656	Temperature too high; Contains too-long poly nucleotide tract;	0	0	0	43.6881
105	10nt ed5	0	CTGGACTCTC	25	CTGGACTCTC	CTGGACTCTC	CTGGACTCTCATGTCACCACAAACAGAGACTAAAGC	70.047	47.222	0	5.79	32.39	3.51	26.0472	Temperature too high;	CTGGACTCTC	CTGGACTCTC	CTGGACTCTCGTAAAATCAAGTCCACCACG	67.668	50	0.98	9.87	0	4.94	17.6675	Temperature too high; Contains too-long poly nucleotide tract;	3.17	4.55	0	43.7147
49	10nt ed5	0	ACGTAGCGAT	26	ACGTAGCGAT	ACGTAGCGAT	ACGTAGCGATATGTCACCACAAACAGAGACTAAAGC	69.902	44.444	0	0.73	31.2	3.51	25.9015	Temperature too high;	ACGTAGCGAT	ACGTAGCGAT	ACGTAGCGATGTAAAATCAAGTCCACCACG	67.878	46.667	0	0	30.67	4.94	17.8776	Temperature too high; Contains too-long poly nucleotide tract;	0	0	0	43.7791
56	10nt ed5	0	AGTATAGCGC	26	AGTATAGCGC	AGTATAGCGC	AGTATAGCGCATGTCACCACAAACAGAGACTAAAGC	70.105	44.444	0	2.49	31.2	3.51	26.1047	Temperature too high;	AGTATAGCGC	AGTATAGCGC	AGTATAGCGCGTAAAATCAAGTCCACCACG	67.742	46.667	0	0	0	4.94	17.742	Temperature too high; Contains too-long poly nucleotide tract;	0	0	0	43.8467
156	10nt ed5	0	TTGTCTCGAC	23	TTGTCTCGAC	TTGTCTCGAC	TTGTCTCGACATGTCACCACAAACAGAGACTAAAGC	70.132	44.444	0.25	13.1	37.82	3.51	26.1316	Temperature too high;	TTGTCTCGAC	TTGTCTCGAC	TTGTCTCGACGTAAAATCAAGTCCACCACG	67.778	46.667	0	0	0	4.94	17.7775	Temperature too high; Contains too-long poly nucleotide tract;	2.62	2.31	0	43.9091
30	10nt ed5	0	ACCGCCTATT	23	ACCGCCTATT	ACCGCCTATT	ACCGCCTATTATGTCACCACAAACAGAGACTAAAGC	69.976	44.444	0	0	31.2	3.51	25.9764	Temperature too high;	ACCGCCTATT	ACCGCCTATT	ACCGCCTATTGTAAAATCAAGTCCACCACG	67.938	46.667	0	0	0	4.94	17.9381	Temperature too high; Contains too-long poly nucleotide tract;	0	0	0	43.9145
136	10nt ed5	0	GGAGCTATGG	29	GGAGCTATGG	GGAGCTATGG	GGAGCTATGGATGTCACCACAAACAGAGACTAAAGC	70.155	47.222	0	1.43	39.45	3.51	26.155	Temperature too high;	GGAGCTATGG	GGAGCTATGG	GGAGCTATGGGTAAAATCAAGTCCACCACG	67.814	50	0	0	0	4.94	17.8139	Temperature too high; Contains too-long poly nucleotide tract;	0	0	0	43.9689
22	10nt ed5	0	ACAAGAGCAG	28	ACAAGAGCAG	ACAAGAGCAG	ACAAGAGCAGATGTCACCACAAACAGAGACTAAAGC	70.196	44.444	0	0	31.2	3.51	26.1964	Temperature too high;	ACAAGAGCAG	ACAAGAGCAG	ACAAGAGCAGGTAAAATCAAGTCCACCACG	67.863	46.667	0	0	0	4.94	17.8632	Temperature too high; Contains too-long poly nucleotide tract;	0	0	0	44.0596
27	10nt ed5	0	ACATGGTCCA	25	ACATGGTCCA	ACATGGTCCA	ACATGGTCCAATGTCACCACAAACAGAGACTAAAGC	70.41	44.444	0	2.78	31.2	3.51	26.4103	Temperature too high;	ACATGGTCCA	ACATGGTCCA	ACATGGTCCAGTAAAATCAAGTCCACCACG	67.705	46.667	0	0	0	4.94	17.7054	Temperature too high; Contains too-long poly nucleotide tract;	1.7	0	0	44.1157
130	10nt ed5	0	GGTACGCTCT	26	GGTACGCTCT	GGTACGCTCT	GGTACGCTCTATGTCACCACAAACAGAGACTAAAGC	70.058	47.222	0	0	32.23	3.51	26.0585	Temperature too high;	GGTACGCTCT	GGTACGCTCT	GGTACGCTCTGTAAAATCAAGTCCACCACG	68.065	50	0	0	29.81	4.94	18.0646	Temperature too high; Contains too-long poly nucleotide tract;	0	2.64	0	44.1231
87	10nt ed5	0	CGGATGAGGA	30	CGGATGAGGA	CGGATGAGGA	CGGATGAGGAATGTCACCACAAACAGAGACTAAAGC	70.416	47.222	0	0	31.2	3.51	26.4162	Temperature too high;	CGGATGAGGA	CGGATGAGGA	CGGATGAGGAGTAAAATCAAGTCCACCACG	67.748	50	0	0.7	34.39	4.94	17.7484	Temperature too high; Contains too-long poly nucleotide tract;	0	0	0	44.1646
94	10nt ed5	0	CGATAGGCTG	28	CGATAGGCTG	CGATAGGCTG	CGATAGGCTGATGTCACCACAAACAGAGACTAAAGC	70.267	47.222	0.12	3.29	35.97	3.51	26.2672	Temperature too high;	CGATAGGCTG	CGATAGGCTG	CGATAGGCTGGTAAAATCAAGTCCACCACG	67.972	50	0	0	0	4.94	17.9724	Temperature too high; Contains too-long poly nucleotide tract;	0	0	0	44.2397
51	10nt ed5	0	AGCTCAACGA	26	AGCTCAACGA	AGCTCAACGA	AGCTCAACGAATGTCACCACAAACAGAGACTAAAGC	70.487	44.444	0	0	31.2	3.51	26.4875	Temperature too high;	AGCTCAACGA	AGCTCAACGA	AGCTCAACGAGTAAAATCAAGTCCACCACG	67.836	46.667	0	0	27.74	4.94	17.8362	Temperature too high; Contains too-long poly nucleotide tract;	0	0	0	44.3236
99	10nt ed5	0	CCTTGTCGAG	26	CCTTGTCGAG	CCTTGTCGAG	CCTTGTCGAGATGTCACCACAAACAGAGACTAAAGC	70.338	47.222	0	0	31.2	3.51	26.3384	Temperature too high;	CCTTGTCGAG	CCTTGTCGAG	CCTTGTCGAGGTAAAATCAAGTCCACCACG	68.06	50	0	2.99	37.37	4.94	18.0598	Temperature too high; Contains too-long poly nucleotide tract;	0	0	0	44.3982
67	10nt ed5	0	CAACTGGAGG	29	CAACTGGAGG	CAACTGGAGG	CAACTGGAGGATGTCACCACAAACAGAGACTAAAGC	70.381	47.222	0	0	31.2	3.51	26.3815	Temperature too high;	CAACTGGAGG	CAACTGGAGG	CAACTGGAGGGTAAAATCAAGTCCACCACG	68.089	50	0	0	21.01	4.94	18.0889	Temperature too high; Contains too-long poly nucleotide tract;	0	0.28	0	44.4704
81	10nt ed5	0	CCAGCACCTA	26	CCAGCACCTA	CCAGCACCTA	CCAGCACCTAATGTCACCACAAACAGAGACTAAAGC	70.566	47.222	0	0	31.2	3.51	26.566	Temperature too high;	CCAGCACCTA	CCAGCACCTA	CCAGCACCTAGTAAAATCAAGTCCACCACG	67.918	50	0	0	0	4.94	17.9181	Temperature too high; Contains too-long poly nucleotide tract;	0	0	0	44.4841
96	10nt ed5	0	CACTCTGCCT	24	CACTCTGCCT	CACTCTGCCT	CACTCTGCCTATGTCACCACAAACAGAGACTAAAGC	70.232	47.222	1.75	17.07	31.38	3.51	26.232	Temperature too high;	CACTCTGCCT	CACTCTGCCT	CACTCTGCCTGTAAAATCAAGTCCACCACG	68.258	50	0	0	0	4.94	18.2581	Temperature too high; Contains too-long poly nucleotide tract;	0	0	0	44.4901
129	10nt ed5	0	GCTCCTCTTG	24	GCTCCTCTTG	GCTCCTCTTG	GCTCCTCTTGATGTCACCACAAACAGAGACTAAAGC	70.39	47.222	2.9	4.38	31.2	3.51	26.3897	Temperature too high;	GCTCCTCTTG	GCTCCTCTTG	GCTCCTCTTGGTAAAATCAAGTCCACCACG	68.107	50	0	0	38.08	4.94	18.1073	Temperature too high; Contains too-long poly nucleotide tract;	7.3	8.29	0	44.4969
90	10nt ed5	0	CGTAATCCGG	27	CGTAATCCGG	CGTAATCCGG	CGTAATCCGGATGTCACCACAAACAGAGACTAAAGC	70.395	47.222	0	4.66	31.2	3.51	26.3949	Temperature too high;	CGTAATCCGG	CGTAATCCGG	CGTAATCCGGGTAAAATCAAGTCCACCACG	68.133	50	0	0	0	4.94	18.1334	Temperature too high; Contains too-long poly nucleotide tract;	0	0	0	44.5283
73	10nt ed5	0	CCGACTAAGC	27	CCGACTAAGC	CCGACTAAGC	CCGACTAAGCATGTCACCACAAACAGAGACTAAAGC	70.522	47.222	0	2.19	31.2	3.51	26.5215	Temperature too high;	CCGACTAAGC	CCGACTAAGC	CCGACTAAGCGTAAAATCAAGTCCACCACG	68.252	50	0	0	0	4.94	18.2519	Temperature too high; Contains too-long poly nucleotide tract;	0	0	0	44.7735
26	10nt ed5	0	ACAGATTCGC	25	ACAGATTCGC	ACAGATTCGC	ACAGATTCGCATGTCACCACAAACAGAGACTAAAGC	70.529	44.444	0	0	31.2	3.51	26.5286	Temperature too high;	ACAGATTCGC	ACAGATTCGC	ACAGATTCGCGTAAAATCAAGTCCACCACG	68.248	46.667	0	10.66	31.84	4.94	18.2482	Temperature too high; Contains too-long poly nucleotide tract;	0	0	0	44.7768
106	10nt ed5	0	CTGGTTCCGT	25	CTGGTTCCGT	CTGGTTCCGT	CTGGTTCCGTATGTCACCACAAACAGAGACTAAAGC	70.36	47.222	0	0	26.36	3.51	26.3603	Temperature too high;	CTGGTTCCGT	CTGGTTCCGT	CTGGTTCCGTGTAAAATCAAGTCCACCACG	68.418	50	0	0	0	4.94	18.418	Temperature too high; Contains too-long poly nucleotide tract;	0	0	0	44.7783
154	10nt ed5	0	TTGGCCAAGA	26	TTGGCCAAGA	TTGGCCAAGA	TTGGCCAAGAATGTCACCACAAACAGAGACTAAAGC	70.709	44.444	0	14.84	31.2	3.51	26.7094	Temperature too high;	TTGGCCAAGA	TTGGCCAAGA	TTGGCCAAGAGTAAAATCAAGTCCACCACG	68.07	46.667	0	14.84	0	4.94	18.0705	Temperature too high; Contains too-long poly nucleotide tract;	15.11	14.84	0	44.7799
120	10nt ed5	0	GCCTTCAGGA	27	GCCTTCAGGA	GCCTTCAGGA	GCCTTCAGGAATGTCACCACAAACAGAGACTAAAGC	70.724	47.222	0	0	29.91	3.51	26.7238	Temperature too high;	GCCTTCAGGA	GCCTTCAGGA	GCCTTCAGGAGTAAAATCAAGTCCACCACG	68.107	50	0	0	34.39	4.94	18.1073	Temperature too high; Contains too-long poly nucleotide tract;	0	0	0	44.8311
117	10nt ed5	0	GAACTCTCGC	26	GAACTCTCGC	GAACTCTCGC	GAACTCTCGCATGTCACCACAAACAGAGACTAAAGC	70.641	47.222	0	3.46	31.2	3.51	26.6406	Temperature too high;	GAACTCTCGC	GAACTCTCGC	GAACTCTCGCGTAAAATCAAGTCCACCACG	68.403	50	0	0	0	4.94	18.4029	Temperature too high; Contains too-long poly nucleotide tract;	0	0	0	45.0436
4	10nt ed5	0	AACAAGCCGA	27	AACAAGCCGA	AACAAGCCGA	AACAAGCCGAATGTCACCACAAACAGAGACTAAAGC	70.821	44.444	0	0	31.2	3.51	26.821	Temperature too high;	AACAAGCCGA	AACAAGCCGA	AACAAGCCGAGTAAAATCAAGTCCACCACG	68.23	46.667	0	0	0	4.94	18.2301	Temperature too high; Contains too-long poly nucleotide tract;	0	0	0	45.0511
97	10nt ed5	0	CCGTTCTTCC	23	CCGTTCTTCC	CCGTTCTTCC	CCGTTCTTCCATGTCACCACAAACAGAGACTAAAGC	70.671	47.222	0	0	31.2	3.51	26.6708	Temperature too high;	CCGTTCTTCC	CCGTTCTTCC	CCGTTCTTCCGTAAAATCAAGTCCACCACG	68.421	50	0	0	0	4.94	18.4209	Temperature too high; Contains too-long poly nucleotide tract;	0	0	0	45.0917
80	10nt ed5	0	CCACCTTGTC	24	CCACCTTGTC	CCACCTTGTC	CCACCTTGTCATGTCACCACAAACAGAGACTAAAGC	70.679	47.222	0	0	30.15	3.51	26.6787	Temperature too high;	CCACCTTGTC	CCACCTTGTC	CCACCTTGTCGTAAAATCAAGTCCACCACG	68.418	50	0	1.24	33.84	4.94	18.418	Temperature too high; Contains too-long poly nucleotide tract;	0	0	0	45.0967
16	10nt ed5	0	AATCGGCGAA	27	AATCGGCGAA	AATCGGCGAA	AATCGGCGAAATGTCACCACAAACAGAGACTAAAGC	70.854	44.444	0	2	31.2	3.51	26.8536	Temperature too high;	AATCGGCGAA	AATCGGCGAA	AATCGGCGAAGTAAAATCAAGTCCACCACG	68.283	46.667	0	0	0	4.94	18.2826	Temperature too high; Contains too-long poly nucleotide tract;	0	0	0	45.1362
83	10nt ed5	0	CCATCGCAGT	26	CCATCGCAGT	CCATCGCAGT	CCATCGCAGTATGTCACCACAAACAGAGACTAAAGC	70.563	47.222	0	0	29.62	3.51	26.5625	Temperature too high;	CCATCGCAGT	CCATCGCAGT	CCATCGCAGTGTAAAATCAAGTCCACCACG	68.666	50	0	0	0	4.94	18.6664	Temperature too high; Contains too-long poly nucleotide tract;	0	0	0	45.2289
114	10nt ed5	0	GATTCGCCAG	27	GATTCGCCAG	GATTCGCCAG	GATTCGCCAGATGTCACCACAAACAGAGACTAAAGC	70.719	47.222	0	0	31.2	3.51	26.7191	Temperature too high;	GATTCGCCAG	GATTCGCCAG	GATTCGCCAGGTAAAATCAAGTCCACCACG	68.519	50	0	2.02	0	4.94	18.5188	Temperature too high; Contains too-long poly nucleotide tract;	0	0	0	45.2379
119	10nt ed5	0	GCAGGCGTAT	28	GCAGGCGTAT	GCAGGCGTAT	GCAGGCGTATATGTCACCACAAACAGAGACTAAAGC	70.592	47.222	0	0	31.2	3.51	26.5923	Temperature too high;	GCAGGCGTAT	GCAGGCGTAT	GCAGGCGTATGTAAAATCAAGTCCACCACG	68.704	50	0	0	0	4.94	18.704	Temperature too high; Contains too-long poly nucleotide tract;	0	0	0	45.2964
21	10nt ed5	0	ACAACGCTTC	24	ACAACGCTTC	ACAACGCTTC	ACAACGCTTCATGTCACCACAAACAGAGACTAAAGC	70.783	44.444	4.63	4.63	31.2	3.51	26.7828	Temperature too high;	ACAACGCTTC	ACAACGCTTC	ACAACGCTTCGTAAAATCAAGTCCACCACG	68.555	46.667	0	0	34.91	4.94	18.5554	Temperature too high; Contains too-long poly nucleotide tract;	0	0	0	45.3382
143	10nt ed5	0	GTGCACTGGA	28	GTGCACTGGA	GTGCACTGGA	GTGCACTGGAATGTCACCACAAACAGAGACTAAAGC	70.981	47.222	0	7.1	31.85	3.51	26.9808	Temperature too high;	GTGCACTGGA	GTGCACTGGA	GTGCACTGGAGTAAAATCAAGTCCACCACG	68.432	50	0	7.1	28.06	4.94	18.4321	Temperature too high; Contains too-long poly nucleotide tract;	6.01	7.1	0	45.4129
102	10nt ed5	0	CTACAACGGC	27	CTACAACGGC	CTACAACGGC	CTACAACGGCATGTCACCACAAACAGAGACTAAAGC	70.816	47.222	0	0	31.2	3.51	26.8155	Temperature too high;	CTACAACGGC	CTACAACGGC	CTACAACGGCGTAAAATCAAGTCCACCACG	68.606	50	0	0	0	4.94	18.6056	Temperature too high; Contains too-long poly nucleotide tract;	0	0	0	45.4211
9	10nt ed5	0	AACCATGCAC	25	AACCATGCAC	AACCATGCAC	AACCATGCACATGTCACCACAAACAGAGACTAAAGC	70.871	44.444	0	6.28	31.2	3.51	26.871	Temperature too high;	AACCATGCAC	AACCATGCAC	AACCATGCACGTAAAATCAAGTCCACCACG	68.638	46.667	0	0	0	4.94	18.6379	Temperature too high; Contains too-long poly nucleotide tract;	0	0	0	45.5089
125	10nt ed5	0	GGCGAAGGTT	29	GGCGAAGGTT	GGCGAAGGTT	GGCGAAGGTTATGTCACCACAAACAGAGACTAAAGC	70.701	47.222	0	0	35.68	3.51	26.7006	Temperature too high;	GGCGAAGGTT	GGCGAAGGTT	GGCGAAGGTTGTAAAATCAAGTCCACCACG	68.827	50	0	0	0	4.94	18.8265	Temperature too high; Contains too-long poly nucleotide tract;	0	1.1	0	45.5272
140	10nt ed5	0	GTTGCCACCT	25	GTTGCCACCT	GTTGCCACCT	GTTGCCACCTATGTCACCACAAACAGAGACTAAAGC	70.709	47.222	0	0	31.38	3.51	26.7086	Temperature too high;	GTTGCCACCT	GTTGCCACCT	GTTGCCACCTGTAAAATCAAGTCCACCACG	68.826	50	0	0	0	4.94	18.8258	Temperature too high; Contains too-long poly nucleotide tract;	0	0	0	45.5344
126	10nt ed5	0	GGCGGATTGA	29	GGCGGATTGA	GGCGGATTGA	GGCGGATTGAATGTCACCACAAACAGAGACTAAAGC	71.051	47.222	0	0	31.2	3.51	27.0514	Temperature too high;	GGCGGATTGA	GGCGGATTGA	GGCGGATTGAGTAAAATCAAGTCCACCACG	68.519	50	0.18	7.5	37.52	4.94	18.5188	Temperature too high; Contains too-long poly nucleotide tract;	1.93	0.12	0	45.5702
151	10nt ed5	0	TCCTCACTGG	25	TCCTCACTGG	TCCTCACTGG	TCCTCACTGGATGTCACCACAAACAGAGACTAAAGC	70.953	47.222	0	0.58	35.48	3.51	26.9528	Temperature too high;	TCCTCACTGG	TCCTCACTGG	TCCTCACTGGGTAAAATCAAGTCCACCACG	68.751	50	0	0	34.1	4.94	18.7506	Temperature too high; Contains too-long poly nucleotide tract;	0	0	0	45.7033
85	10nt ed5	0	CGCTTGGACA	27	CGCTTGGACA	CGCTTGGACA	CGCTTGGACAATGTCACCACAAACAGAGACTAAAGC	71.124	47.222	4.25	4.25	31.2	3.51	27.1238	Temperature too high;	CGCTTGGACA	CGCTTGGACA	CGCTTGGACAGTAAAATCAAGTCCACCACG	68.618	50	5.61	5.61	36.68	4.94	18.618	Temperature too high; Contains too-long poly nucleotide tract;	2.8	1.72	0	45.7418
75	10nt ed5	0	CCGCCGTTAA	26	CCGCCGTTAA	CCGCCGTTAA	CCGCCGTTAAATGTCACCACAAACAGAGACTAAAGC	71.137	47.222	0	0	31.2	3.51	27.1374	Temperature too high;	CCGCCGTTAA	CCGCCGTTAA	CCGCCGTTAAGTAAAATCAAGTCCACCACG	68.641	50	0	0	0	4.94	18.6413	Temperature too high; Contains too-long poly nucleotide tract;	0	0	0	45.7786
60	10nt ed5	0	ATCCTAGGCG	27	ATCCTAGGCG	ATCCTAGGCG	ATCCTAGGCGATGTCACCACAAACAGAGACTAAAGC	71.031	47.222	0	0	31.2	3.51	27.0308	Temperature too high;	ATCCTAGGCG	ATCCTAGGCG	ATCCTAGGCGGTAAAATCAAGTCCACCACG	68.854	50	0	0	0	4.94	18.8545	Temperature too high; Contains too-long poly nucleotide tract;	0	0	0	45.8852
72	10nt ed5	0	CCGAATGCCA	27	CCGAATGCCA	CCGAATGCCA	CCGAATGCCAATGTCACCACAAACAGAGACTAAAGC	71.204	47.222	0	0	31.2	3.51	27.204	Temperature too high;	CCGAATGCCA	CCGAATGCCA	CCGAATGCCAGTAAAATCAAGTCCACCACG	68.703	50	0	0	0	4.94	18.7027	Temperature too high; Contains too-long poly nucleotide tract;	0	0	0	45.9067
57	10nt ed5	0	AGTCCGACTG	27	AGTCCGACTG	AGTCCGACTG	AGTCCGACTGATGTCACCACAAACAGAGACTAAAGC	71.063	47.222	3.24	15.09	39.64	3.51	27.0627	Temperature too high;	AGTCCGACTG	AGTCCGACTG	AGTCCGACTGGTAAAATCAAGTCCACCACG	68.904	50	0	0	34.14	4.94	18.9043	Temperature too high; Contains too-long poly nucleotide tract;	8.01	2.48	0	45.967
153	10nt ed5	0	TCGCTGAGAG	28	TCGCTGAGAG	TCGCTGAGAG	TCGCTGAGAGATGTCACCACAAACAGAGACTAAAGC	71.065	47.222	0	0	31.2	3.51	27.0649	Temperature too high;	TCGCTGAGAG	TCGCTGAGAG	TCGCTGAGAGGTAAAATCAAGTCCACCACG	68.916	50	0	0	0	4.94	18.9158	Temperature too high; Contains too-long poly nucleotide tract;	0	0	0	45.9807
100	10nt ed5	0	CGTGCCAATC	26	CGTGCCAATC	CGTGCCAATC	CGTGCCAATCATGTCACCACAAACAGAGACTAAAGC	71.165	47.222	0	3.88	31.2	3.51	27.1647	Temperature too high;	CGTGCCAATC	CGTGCCAATC	CGTGCCAATCGTAAAATCAAGTCCACCACG	69.02	50	0	0	0	4.94	19.0202	Temperature too high; Contains too-long poly nucleotide tract;	0	0	0	46.1849
146	10nt ed5	0	TAGGCATCGG	28	TAGGCATCGG	TAGGCATCGG	TAGGCATCGGATGTCACCACAAACAGAGACTAAAGC	71.169	47.222	0	6.27	32.95	3.51	27.1695	Temperature too high;	TAGGCATCGG	TAGGCATCGG	TAGGCATCGGGTAAAATCAAGTCCACCACG	69.026	50	0	0	0	4.94	19.0258	Temperature too high; Contains too-long poly nucleotide tract;	0	0	0	46.1953
95	10nt ed5	0	CGCCAGCATT	26	CGCCAGCATT	CGCCAGCATT	CGCCAGCATTATGTCACCACAAACAGAGACTAAAGC	71.054	47.222	0	0	31.2	3.51	27.0535	Temperature too high;	CGCCAGCATT	CGCCAGCATT	CGCCAGCATTGTAAAATCAAGTCCACCACG	69.255	50	0	0	0	4.94	19.2548	Temperature too high; Contains too-long poly nucleotide tract;	0	0	0	46.3084
55	10nt ed5	0	AGGCGTGTAG	29	AGGCGTGTAG	AGGCGTGTAG	AGGCGTGTAGATGTCACCACAAACAGAGACTAAAGC	71.246	47.222	0	0	31.2	3.51	27.2461	Temperature too high;	AGGCGTGTAG	AGGCGTGTAG	AGGCGTGTAGGTAAAATCAAGTCCACCACG	69.128	50	11.04	11.04	38.93	4.94	19.1277	Temperature too high; Contains too-long poly nucleotide tract;	0	0	0	46.3738
32	10nt ed5	0	ACCGTGAGTC	27	ACCGTGAGTC	ACCGTGAGTC	ACCGTGAGTCATGTCACCACAAACAGAGACTAAAGC	71.358	47.222	0	7.9	38.88	3.51	27.3583	Temperature too high;	ACCGTGAGTC	ACCGTGAGTC	ACCGTGAGTCGTAAAATCAAGTCCACCACG	69.223	50	0	0	35.94	4.94	19.2232	Temperature too high; Contains too-long poly nucleotide tract;	0	0	0	46.5815
145	10nt ed5	0	TAGCGGCACT	27	TAGCGGCACT	TAGCGGCACT	TAGCGGCACTATGTCACCACAAACAGAGACTAAAGC	71.272	47.222	0	0	31.38	3.51	27.2715	Temperature too high;	TAGCGGCACT	TAGCGGCACT	TAGCGGCACTGTAAAATCAAGTCCACCACG	69.495	50	0	0	0	4.94	19.4948	Temperature too high; Contains too-long poly nucleotide tract;	0.44	0	0	46.7664
141	10nt ed5	0	TAAGAGCGCC	28	TAAGAGCGCC	TAAGAGCGCC	TAAGAGCGCCATGTCACCACAAACAGAGACTAAAGC	71.582	47.222	0	0	31.2	3.51	27.5822	Temperature too high;	TAAGAGCGCC	TAAGAGCGCC	TAAGAGCGCCGTAAAATCAAGTCCACCACG	69.492	50	0	0	0	4.94	19.4919	Temperature too high; Contains too-long poly nucleotide tract;	0	0	0	47.0741
40	10nt ed5	0	ACTGGCTTGG	27	ACTGGCTTGG	ACTGGCTTGG	ACTGGCTTGGATGTCACCACAAACAGAGACTAAAGC	71.611	47.222	4	11.82	36.2	3.51	27.6105	Temperature too high;	ACTGGCTTGG	ACTGGCTTGG	ACTGGCTTGGGTAAAATCAAGTCCACCACG	69.545	50	5.43	10.6	37.84	4.94	19.5454	Temperature too high; Contains too-long poly nucleotide tract;	7.6	12.44	0	47.1559
38	10nt ed5	0	AAGGTGCCTG	28	AAGGTGCCTG	AAGGTGCCTG	AAGGTGCCTGATGTCACCACAAACAGAGACTAAAGC	71.611	47.222	0.36	6.01	35.97	3.51	27.6105	Temperature too high;	AAGGTGCCTG	AAGGTGCCTG	AAGGTGCCTGGTAAAATCAAGTCCACCACG	69.545	50	0	1.51	27.63	4.94	19.5454	Temperature too high; Contains too-long poly nucleotide tract;	0	7.6	0	47.1559
54	10nt ed5	0	AGGCACAGCT	28	AGGCACAGCT	AGGCACAGCT	AGGCACAGCTATGTCACCACAAACAGAGACTAAAGC	71.457	47.222	0.71	0.71	31.38	3.51	27.4566	Temperature too high;	AGGCACAGCT	AGGCACAGCT	AGGCACAGCTGTAAAATCAAGTCCACCACG	69.703	50	0	9.88	0	4.94	19.7029	Temperature too high; Contains too-long poly nucleotide tract;	0	1.42	0	47.1595
62	10nt ed5	0	ATGAGGCCAC	28	ATGAGGCCAC	ATGAGGCCAC	ATGAGGCCACATGTCACCACAAACAGAGACTAAAGC	71.652	47.222	0	10.41	31.2	3.51	27.6523	Temperature too high;	ATGAGGCCAC	ATGAGGCCAC	ATGAGGCCACGTAAAATCAAGTCCACCACG	69.551	50	0	0	0	4.94	19.551	Temperature too high; Contains too-long poly nucleotide tract;	6.42	0	0	47.2033
37	10nt ed5	0	AAGGCCGTCA	28	AAGGCCGTCA	AAGGCCGTCA	AAGGCCGTCAATGTCACCACAAACAGAGACTAAAGC	71.893	47.222	0.66	2.27	31.2	3.51	27.8931	Temperature too high;	AAGGCCGTCA	AAGGCCGTCA	AAGGCCGTCAGTAAAATCAAGTCCACCACG	69.502	50	0	0	0	4.94	19.5018	Temperature too high; Contains too-long poly nucleotide tract;	0	0	0	47.3949
162	10nt ed5	0	TGACGTCGCA	27	TGACGTCGCA	TGACGTCGCA	TGACGTCGCAATGTCACCACAAACAGAGACTAAAGC	71.931	47.222	0	8.69	39.2	3.51	27.9311	Temperature too high;	TGACGTCGCA	TGACGTCGCA	TGACGTCGCAGTAAAATCAAGTCCACCACG	69.586	50	0	8.69	0	4.94	19.5859	Temperature too high; Contains too-long poly nucleotide tract;	0	8.69	0	47.517
42	10nt ed5	0	ACTTCCGCAC	25	ACTTCCGCAC	ACTTCCGCAC	ACTTCCGCACATGTCACCACAAACAGAGACTAAAGC	71.851	47.222	0	0	31.2	3.51	27.851	Temperature too high;	ACTTCCGCAC	ACTTCCGCAC	ACTTCCGCACGTAAAATCAAGTCCACCACG	69.812	50	0	0	0	4.94	19.8124	Temperature too high; Contains too-long poly nucleotide tract;	0	0	0	47.6634
64	10nt ed5	0	ATTGACCGCG	27	ATTGACCGCG	ATTGACCGCG	ATTGACCGCGATGTCACCACAAACAGAGACTAAAGC	71.879	47.222	0	12.18	39.72	3.51	27.879	Temperature too high;	ATTGACCGCG	ATTGACCGCG	ATTGACCGCGGTAAAATCAAGTCCACCACG	69.902	50	0	24.83	0	4.94	19.9025	Temperature too high; Contains too-long poly nucleotide tract;	0	17.1	0	47.7815
155	10nt ed5	0	TTGGCGGTTC	26	TTGGCGGTTC	TTGGCGGTTC	TTGGCGGTTCATGTCACCACAAACAGAGACTAAAGC	72.029	47.222	2.38	10.68	31.2	3.51	28.0293	Temperature too high;	TTGGCGGTTC	TTGGCGGTTC	TTGGCGGTTCGTAAAATCAAGTCCACCACG	70.02	50	0	0	0	4.94	20.0198	Temperature too high; Contains too-long poly nucleotide tract;	4.7	0	0	48.0491
2	10nt ed5	0	TTGTTGGCGG	27	TTGTTGGCGG	TTGTTGGCGG	TTGTTGGCGGATGTCACCACAAACAGAGACTAAAGC	72.029	47.222	0	2.41	31.2	3.51	28.0293	Temperature too high;	TTGTTGGCGG	TTGTTGGCGG	TTGTTGGCGGGTAAAATCAAGTCCACCACG	70.068	50	0	0	0	4.94	20.0679	Temperature too high; Contains too-long poly nucleotide tract;	3.9	0.54	0	48.0972
91	10nt ed5	0	CGTAGTATAC	23	CGTAGTATAC	CGTAGTATAC	CGTAGTATACATGTCACCACAAACAGAGACTAAAGC	67.357	41.667	0	0	31.2	3.51	23.3567	Temperature too high;	CGTAGTATAC	CGTAGTATAC	CGTAGTATACGTAAAATCAAGTCCACCACG	64.502	43.333	0	0	43.3	4.94	14.5015	Temperature too high; Hairpin stability too high; Contains too-long poly nucleotide tract;	0	0	1	37.8582
142	10nt ed5	0	GTGAGATGAT	25	GTGAGATGAT	GTGAGATGAT	GTGAGATGATATGTCACCACAAACAGAGACTAAAGC	67.559	41.667	0	5.94	39.89	3.51	23.5593	Temperature too high;	GTGAGATGAT	GTGAGATGAT	GTGAGATGATGTAAAATCAAGTCCACCACG	65.076	43.333	0	0	43.32	4.94	15.0755	Temperature too high; Hairpin stability too high; Contains too-long poly nucleotide tract;	0	0	1	38.6349
103	10nt ed5	0	CTACGTGATT	22	CTACGTGATT	CTACGTGATT	CTACGTGATTATGTCACCACAAACAGAGACTAAAGC	67.669	41.667	0	0	47.49	3.51	23.6693	Temperature too high; Hairpin stability too high;	CTACGTGATT	CTACGTGATT	CTACGTGATTGTAAAATCAAGTCCACCACG	65.226	43.333	8.86	17.36	38.41	4.94	15.2259	Temperature too high; Contains too-long poly nucleotide tract;	0	4.97	1	38.8952
108	10nt ed5	0	CTTATTGGTC	21	CTTATTGGTC	CTTATTGGTC	CTTATTGGTCATGTCACCACAAACAGAGACTAAAGC	68.005	41.667	0	1.3	41.22	3.51	24.005	Temperature too high; Hairpin stability too high;	CTTATTGGTC	CTTATTGGTC	CTTATTGGTCGTAAAATCAAGTCCACCACG	65.247	43.333	0	0	0	4.94	15.2475	Temperature too high; Contains too-long poly nucleotide tract;	0	0	1	39.2525
69	10nt ed5	0	CAAGGACAAT	25	CAAGGACAAT	CAAGGACAAT	CAAGGACAATATGTCACCACAAACAGAGACTAAAGC	68.005	41.667	0	0	45.57	3.51	24.005	Temperature too high; Hairpin stability too high;	CAAGGACAAT	CAAGGACAAT	CAAGGACAATGTAAAATCAAGTCCACCACG	65.604	43.333	0.91	13.78	38.9	4.94	15.604	Temperature too high; Contains too-long poly nucleotide tract;	0	0.2	1	39.609
7	10nt ed5	0	AACAGTCTCT	22	AACAGTCTCT	AACAGTCTCT	AACAGTCTCTATGTCACCACAAACAGAGACTAAAGC	68.34	41.667	3.5	16.84	45.83	3.51	24.3398	Temperature too high; Hairpin stability too high;	AACAGTCTCT	AACAGTCTCT	AACAGTCTCTGTAAAATCAAGTCCACCACG	65.984	43.333	0	0	38.79	4.94	15.9838	Temperature too high; Contains too-long poly nucleotide tract;	0	2.15	1	40.3236
25	10nt ed5	0	ACAGAAGACT	25	ACAGAAGACT	ACAGAAGACT	ACAGAAGACTATGTCACCACAAACAGAGACTAAAGC	68.34	41.667	0	0	31.81	3.51	24.3398	Temperature too high;	ACAGAAGACT	ACAGAAGACT	ACAGAAGACTGTAAAATCAAGTCCACCACG	65.984	43.333	0	0	48.21	4.94	15.9838	Temperature too high; Hairpin stability too high; Contains too-long poly nucleotide tract;	0	0	1	40.3236
8	10nt ed5	0	AACCAATAGG	25	AACCAATAGG	AACCAATAGG	AACCAATAGGATGTCACCACAAACAGAGACTAAAGC	68.747	41.667	0	0	31.02	3.51	24.7468	Temperature too high;	AACCAATAGG	AACCAATAGG	AACCAATAGGGTAAAATCAAGTCCACCACG	66.099	43.333	0	0	49.11	4.94	16.0993	Temperature too high; Hairpin stability too high; Contains too-long poly nucleotide tract;	0	0	1	40.8461
33	10nt ed5	0	ACCTCTTGAA	22	ACCTCTTGAA	ACCTCTTGAA	ACCTCTTGAAATGTCACCACAAACAGAGACTAAAGC	68.99	41.667	0	3.33	31.2	3.51	24.9901	Temperature too high;	ACCTCTTGAA	ACCTCTTGAA	ACCTCTTGAAGTAAAATCAAGTCCACCACG	66.009	43.333	0	0	44.51	4.94	16.009	Temperature too high; Hairpin stability too high; Contains too-long poly nucleotide tract;	0	0	1	40.9991
147	10nt ed5	0	TAGTGATGCA	24	TAGTGATGCA	TAGTGATGCA	TAGTGATGCAATGTCACCACAAACAGAGACTAAAGC	69.028	41.667	0	4.16	41.27	3.51	25.0281	Temperature too high; Hairpin stability too high;	TAGTGATGCA	TAGTGATGCA	TAGTGATGCAGTAAAATCAAGTCCACCACG	66.071	43.333	0	0	30	4.94	16.0715	Temperature too high; Contains too-long poly nucleotide tract;	0	0	1	41.0995
39	10nt ed5	0	AAGTCGTTGT	23	AAGTCGTTGT	AAGTCGTTGT	AAGTCGTTGTATGTCACCACAAACAGAGACTAAAGC	68.946	41.667	0	14.15	41.09	3.51	24.9456	Temperature too high; Hairpin stability too high;	AAGTCGTTGT	AAGTCGTTGT	AAGTCGTTGTGTAAAATCAAGTCCACCACG	66.73	43.333	0	0	0	4.94	16.7297	Temperature too high; Contains too-long poly nucleotide tract;	0	0	1	41.6753
20	10nt ed5	0	ACAACATGGT	24	ACAACATGGT	ACAACATGGT	ACAACATGGTATGTCACCACAAACAGAGACTAAAGC	69.019	41.667	0	0	54.69	3.51	25.0188	Temperature too high; Hairpin stability too high;	ACAACATGGT	ACAACATGGT	ACAACATGGTGTAAAATCAAGTCCACCACG	66.795	43.333	0	11.48	26.69	4.94	16.7949	Temperature too high; Contains too-long poly nucleotide tract;	0	4.31	1	41.8136
28	10nt ed5	0	ACCATTGTTG	22	ACCATTGTTG	ACCATTGTTG	ACCATTGTTGATGTCACCACAAACAGAGACTAAAGC	69.334	41.667	0	0	31.2	3.51	25.3338	Temperature too high;	ACCATTGTTG	ACCATTGTTG	ACCATTGTTGGTAAAATCAAGTCCACCACG	66.824	43.333	0	0	49.4	4.94	16.8236	Temperature too high; Hairpin stability too high; Contains too-long poly nucleotide tract;	0	0	1	42.1574
138	10nt ed5	0	GTTCATGACC	24	GTTCATGACC	GTTCATGACC	GTTCATGACCATGTCACCACAAACAGAGACTAAAGC	69.498	44.444	0	0	40.35	3.51	25.4979	Temperature too high; Hairpin stability too high;	GTTCATGACC	GTTCATGACC	GTTCATGACCGTAAAATCAAGTCCACCACG	67.026	46.667	0	0	0	4.94	17.0257	Temperature too high; Contains too-long poly nucleotide tract;	0	0	1	42.5236
46	10nt ed5	0	AGAGGAAGTG	29	AGAGGAAGTG	AGAGGAAGTG	AGAGGAAGTGATGTCACCACAAACAGAGACTAAAGC	69.731	44.444	0	2.27	44.13	3.51	25.7312	Temperature too high; Hairpin stability too high;	AGAGGAAGTG	AGAGGAAGTG	AGAGGAAGTGGTAAAATCAAGTCCACCACG	67.289	46.667	0	3.15	42.74	4.94	17.2888	Temperature too high; Hairpin stability too high; Contains too-long poly nucleotide tract;	2.78	13.12	1	43.02
59	10nt ed5	0	ATATCCGTGG	25	ATATCCGTGG	ATATCCGTGG	ATATCCGTGGATGTCACCACAAACAGAGACTAAAGC	69.831	44.444	0	8.02	50.76	3.51	25.8315	Temperature too high; Hairpin stability too high;	ATATCCGTGG	ATATCCGTGG	ATATCCGTGGGTAAAATCAAGTCCACCACG	67.415	46.667	17.56	17.56	0	4.94	17.4153	Temperature too high; Contains too-long poly nucleotide tract;	0	9.02	1	43.2468
161	10nt ed5	0	TCTCGACGTT	23	TCTCGACGTT	TCTCGACGTT	TCTCGACGTTATGTCACCACAAACAGAGACTAAAGC	69.816	44.444	0	8.49	44.77	3.51	25.8161	Temperature too high; Hairpin stability too high;	TCTCGACGTT	TCTCGACGTT	TCTCGACGTTGTAAAATCAAGTCCACCACG	67.778	46.667	0	0	0	4.94	17.7775	Temperature too high; Contains too-long poly nucleotide tract;	0	0	1	43.5936
44	10nt ed5	0	AGAAGTGACC	27	AGAAGTGACC	AGAAGTGACC	AGAAGTGACCATGTCACCACAAACAGAGACTAAAGC	70.032	44.444	0	13.63	51.84	3.51	26.0322	Temperature too high; Hairpin stability too high;	AGAAGTGACC	AGAAGTGACC	AGAAGTGACCGTAAAATCAAGTCCACCACG	67.631	46.667	0	0	0	4.94	17.6309	Temperature too high; Contains too-long poly nucleotide tract;	0	0	1	43.663
135	10nt ed5	0	GGAAGACCTC	28	GGAAGACCTC	GGAAGACCTC	GGAAGACCTCATGTCACCACAAACAGAGACTAAAGC	70.227	47.222	0	1.27	43.35	3.51	26.2269	Temperature too high; Hairpin stability too high;	GGAAGACCTC	GGAAGACCTC	GGAAGACCTCGTAAAATCAAGTCCACCACG	67.875	50	0	0	0	4.94	17.875	Temperature too high; Contains too-long poly nucleotide tract;	0	0	1	44.1019
74	10nt ed5	0	CCGAGGTCTT	26	CCGAGGTCTT	CCGAGGTCTT	CCGAGGTCTTATGTCACCACAAACAGAGACTAAAGC	70.064	47.222	0	1.2	35.25	3.51	26.0635	Temperature too high;	CCGAGGTCTT	CCGAGGTCTT	CCGAGGTCTTGTAAAATCAAGTCCACCACG	68.06	50	12.45	12.45	42.74	4.94	18.0598	Temperature too high; Hairpin stability too high; Contains too-long poly nucleotide tract;	0	0	1	44.1233
113	10nt ed5	0	GATGGAGACG	30	GATGGAGACG	GATGGAGACG	GATGGAGACGATGTCACCACAAACAGAGACTAAAGC	70.226	47.222	0	5	44.54	3.51	26.2262	Temperature too high; Hairpin stability too high;	GATGGAGACG	GATGGAGACG	GATGGAGACGGTAAAATCAAGTCCACCACG	67.924	50	0	1.18	28.9	4.94	17.9237	Temperature too high; Contains too-long poly nucleotide tract;	0	0	1	44.1499
93	10nt ed5	0	CGTCTCGTGA	26	CGTCTCGTGA	CGTCTCGTGA	CGTCTCGTGAATGTCACCACAAACAGAGACTAAAGC	70.589	47.222	6.07	17.08	42.73	3.51	26.5887	Temperature too high; Hairpin stability too high;	CGTCTCGTGA	CGTCTCGTGA	CGTCTCGTGAGTAAAATCAAGTCCACCACG	67.998	50	0	0	27.73	4.94	17.9981	Temperature too high; Contains too-long poly nucleotide tract;	6.49	6.49	1	44.5868
29	10nt ed5	0	ACCGACACAA	26	ACCGACACAA	ACCGACACAA	ACCGACACAAATGTCACCACAAACAGAGACTAAAGC	70.622	44.444	0	0	48.95	3.51	26.6223	Temperature too high; Hairpin stability too high;	ACCGACACAA	ACCGACACAA	ACCGACACAAGTAAAATCAAGTCCACCACG	67.993	46.667	0	0	0	4.94	17.9925	Temperature too high; Contains too-long poly nucleotide tract;	0	0	1	44.6148
5	10nt ed5	0	AACACACGTG	26	AACACACGTG	AACACACGTG	AACACACGTGATGTCACCACAAACAGAGACTAAAGC	70.585	44.444	0	17.25	35.32	3.51	26.5848	Temperature too high;	AACACACGTG	AACACACGTG	AACACACGTGGTAAAATCAAGTCCACCACG	68.352	46.667	27.06	27.06	45.86	4.94	18.3522	Temperature too high; Hairpin stability too high; Contains too-long poly nucleotide tract;	0.77	12.2	1	44.9371
76	10nt ed5	0	CCGGTGGAAT	28	CCGGTGGAAT	CCGGTGGAAT	CCGGTGGAATATGTCACCACAAACAGAGACTAAAGC	70.438	47.222	0	16.98	32.97	3.51	26.4383	Temperature too high;	CCGGTGGAAT	CCGGTGGAAT	CCGGTGGAATGTAAAATCAAGTCCACCACG	68.502	50	18.24	25.45	48.27	4.94	18.5022	Temperature too high; Hairpin stability too high; Contains too-long poly nucleotide tract;	2.41	12.73	1	44.9405
71	10nt ed5	0	CCGAACAGTG	28	CCGAACAGTG	CCGAACAGTG	CCGAACAGTGATGTCACCACAAACAGAGACTAAAGC	70.633	47.222	0	0	44.13	3.51	26.6333	Temperature too high; Hairpin stability too high;	CCGAACAGTG	CCGAACAGTG	CCGAACAGTGGTAAAATCAAGTCCACCACG	68.418	50	2.78	2.78	42.74	4.94	18.418	Temperature too high; Hairpin stability too high; Contains too-long poly nucleotide tract;	0.28	7.31	1	45.0513
88	10nt ed5	0	CGGTAACACC	27	CGGTAACACC	CGGTAACACC	CGGTAACACCATGTCACCACAAACAGAGACTAAAGC	70.656	47.222	0	0	36.31	3.51	26.6558	Temperature too high;	CGGTAACACC	CGGTAACACC	CGGTAACACCGTAAAATCAAGTCCACCACG	68.407	50	0	5.97	52.16	4.94	18.4069	Temperature too high; Hairpin stability too high; Contains too-long poly nucleotide tract;	3.08	0	1	45.0627
132	10nt ed5	0	GGTTGTGGCT	27	GGTTGTGGCT	GGTTGTGGCT	GGTTGTGGCTATGTCACCACAAACAGAGACTAAAGC	70.709	47.222	4.06	16.26	40.28	3.51	26.7086	Temperature too high; Hairpin stability too high;	GGTTGTGGCT	GGTTGTGGCT	GGTTGTGGCTGTAAAATCAAGTCCACCACG	68.826	50	0	0	0	4.94	18.8258	Temperature too high; Contains too-long poly nucleotide tract;	1.59	5.39	1	45.5344
148	10nt ed5	0	TACGAGGTGG	29	TACGAGGTGG	TACGAGGTGG	TACGAGGTGGATGTCACCACAAACAGAGACTAAAGC	70.928	47.222	0	10.25	57.51	3.51	26.928	Temperature too high; Hairpin stability too high;	TACGAGGTGG	TACGAGGTGG	TACGAGGTGGGTAAAATCAAGTCCACCACG	68.737	50	27.13	27.13	43.04	4.94	18.7368	Temperature too high; Hairpin stability too high; Contains too-long poly nucleotide tract;	13.11	19.18	1	45.6648
11	10nt ed5	0	AACCTCCGGT	26	AACCTCCGGT	AACCTCCGGT	AACCTCCGGTATGTCACCACAAACAGAGACTAAAGC	71.126	47.222	0	3.14	45.02	3.51	27.126	Temperature too high; Hairpin stability too high;	AACCTCCGGT	AACCTCCGGT	AACCTCCGGTGTAAAATCAAGTCCACCACG	69.303	50	0	0	30.41	4.94	19.303	Temperature too high; Contains too-long poly nucleotide tract;	0	0	1	46.4289
131	10nt ed5	0	GGTGCAGCAA	29	GGTGCAGCAA	GGTGCAGCAA	GGTGCAGCAAATGTCACCACAAACAGAGACTAAAGC	71.472	47.222	0	9.4	42.36	3.51	27.4718	Temperature too high; Hairpin stability too high;	GGTGCAGCAA	GGTGCAGCAA	GGTGCAGCAAGTAAAATCAAGTCCACCACG	69.025	50	0	8.76	0	4.94	19.0247	Temperature too high; Contains too-long poly nucleotide tract;	0	8.76	1	46.4965
31	10nt ed5	0	ACCGGTAACG	28	ACCGGTAACG	ACCGGTAACG	ACCGGTAACGATGTCACCACAAACAGAGACTAAAGC	71.371	47.222	0	2.24	71.22	3.51	27.3715	Temperature too high; Hairpin stability too high;	ACCGGTAACG	ACCGGTAACG	ACCGGTAACGGTAAAATCAAGTCCACCACG	69.285	50	0	20.85	81.49	4.94	19.2854	Temperature too high; Hairpin stability too high; Contains too-long poly nucleotide tract;	10.6	10.48	1	46.6569
164	10nt ed5	0	TTCGGAGCAC	27	TTCGGAGCAC	TTCGGAGCAC	TTCGGAGCACATGTCACCACAAACAGAGACTAAAGC	71.694	47.222	0	6.79	31.2	3.51	27.6939	Temperature too high;	TTCGGAGCAC	TTCGGAGCAC	TTCGGAGCACGTAAAATCAAGTCCACCACG	69.626	50	0	0	42.75	4.94	19.6259	Temperature too high; Hairpin stability too high; Contains too-long poly nucleotide tract;	0	0	1	47.3198
47	10nt ed5	0	ACGCAACTCG	27	ACGCAACTCG	ACGCAACTCG	ACGCAACTCGATGTCACCACAAACAGAGACTAAAGC	71.796	47.222	0	2.2	39.23	3.51	27.7963	Temperature too high;	ACGCAACTCG	ACGCAACTCG	ACGCAACTCGGTAAAATCAAGTCCACCACG	69.812	50	0	0	41.69	4.94	19.8124	Temperature too high; Hairpin stability too high; Contains too-long poly nucleotide tract;	0	0	1	47.6087

## Sheet: rbcLa_tagged_with_G_10_nt_tags.
original id	section	unmodified	tag	cycles	left_tag_common	left_tag	left_sequence	left_tm	left_gc	left_self_end	left_self_any	left_hairpin	left_end_stability	left_penalty	left_problems	right_tag_common	right_tag	right_sequence	right_tm	right_gc	right_self_end	right_self_any	right_hairpin	right_end_stability	right_penalty	right_problems	pair_compl_end	pair_compl_any	pair_hairpin_either	pair_penalty
1	None	1	None	0	None	None	ATGTCACCACAAACAGAGACTAAAGC	62.456	42.308	0	0	31.2	3.51	8.45576	None	None	None	GTAAAATCAAGTCCACCGCG	58.21	50	0	0	0	6.46	1.78996	Contains too-long poly nucleotide tract;	0	0	0	10.2457
121	10nt ed5	0	GAGAGTACTA	25	GAGAGTACTA	GAGAGTACTA	GAGAGTACTAATGTCACCACAAACAGAGACTAAAGC	67.163	41.667	0	0	31.2	3.51	23.1627	Temperature too high;	GAGAGTACTA	GAGAGTACTA	GAGAGTACTAGTAAAATCAAGTCCACCGCG	65.716	46.667	0	0	0	6.46	15.7163	Temperature too high; Contains too-long poly nucleotide tract;	0	0	0	38.879
118	10nt ed5	0	GACCTATTCT	21	GACCTATTCT	GACCTATTCT	GACCTATTCTATGTCACCACAAACAGAGACTAAAGC	67.229	41.667	0	0	35.66	3.51	23.2291	Temperature too high;	GACCTATTCT	GACCTATTCT	GACCTATTCTGTAAAATCAAGTCCACCGCG	66.528	46.667	0	0	0	6.46	16.5276	Temperature too high; Contains too-long poly nucleotide tract;	0	0	0	39.7567
77	10nt ed5	0	CATTCCTCTA	20	CATTCCTCTA	CATTCCTCTA	CATTCCTCTAATGTCACCACAAACAGAGACTAAAGC	67.701	41.667	0	0	36.03	3.51	23.7013	Temperature too high;	CATTCCTCTA	CATTCCTCTA	CATTCCTCTAGTAAAATCAAGTCCACCGCG	66.35	46.667	0	0	0	6.46	16.35	Temperature too high; Contains too-long poly nucleotide tract;	0	0	0	40.0513
116	10nt ed5	0	GCACTAGATA	24	GCACTAGATA	GCACTAGATA	GCACTAGATAATGTCACCACAAACAGAGACTAAAGC	67.707	41.667	0	0	31.2	3.51	23.707	Temperature too high;	GCACTAGATA	GCACTAGATA	GCACTAGATAGTAAAATCAAGTCCACCGCG	66.364	46.667	0	0	26.41	6.46	16.364	Temperature too high; Contains too-long poly nucleotide tract;	0	0	0	40.0711
109	10nt ed5	0	CTTCCATAGT	21	CTTCCATAGT	CTTCCATAGT	CTTCCATAGTATGTCACCACAAACAGAGACTAAAGC	67.386	41.667	0	0	29.62	3.51	23.3858	Temperature too high;	CTTCCATAGT	CTTCCATAGT	CTTCCATAGTGTAAAATCAAGTCCACCGCG	66.713	46.667	0	0	0	6.46	16.713	Temperature too high; Contains too-long poly nucleotide tract;	0	0	0	40.0987
104	10nt ed5	0	CTATGCTAAG	23	CTATGCTAAG	CTATGCTAAG	CTATGCTAAGATGTCACCACAAACAGAGACTAAAGC	67.559	41.667	0.54	0.54	31.2	3.51	23.5593	Temperature too high;	CTATGCTAAG	CTATGCTAAG	CTATGCTAAGGTAAAATCAAGTCCACCGCG	66.576	46.667	0	0	0	6.46	16.5761	Temperature too high; Contains too-long poly nucleotide tract;	0	0	0	40.1354
139	10nt ed5	0	GTTCGGTATA	23	GTTCGGTATA	GTTCGGTATA	GTTCGGTATAATGTCACCACAAACAGAGACTAAAGC	67.843	41.667	0	0	31.2	3.51	23.8432	Temperature too high;	GTTCGGTATA	GTTCGGTATA	GTTCGGTATAGTAAAATCAAGTCCACCGCG	66.53	46.667	0	0	27.21	6.46	16.5299	Temperature too high; Contains too-long poly nucleotide tract;	0	0	0	40.3731
112	10nt ed5	0	GATGATCAGT	24	GATGATCAGT	GATGATCAGT	GATGATCAGTATGTCACCACAAACAGAGACTAAAGC	67.559	41.667	0	0	29.62	3.51	23.5593	Temperature too high;	GATGATCAGT	GATGATCAGT	GATGATCAGTGTAAAATCAAGTCCACCGCG	66.921	46.667	0	0	29.02	6.46	16.9205	Temperature too high; Contains too-long poly nucleotide tract;	0	0	0	40.4799
110	10nt ed5	0	CTTCTACCAA	21	CTTCTACCAA	CTTCTACCAA	CTTCTACCAAATGTCACCACAAACAGAGACTAAAGC	67.964	41.667	0	0	31.2	3.51	23.964	Temperature too high;	CTTCTACCAA	CTTCTACCAA	CTTCTACCAAGTAAAATCAAGTCCACCGCG	66.665	46.667	0	0	0	6.46	16.6646	Temperature too high; Contains too-long poly nucleotide tract;	0	0	0	40.6286
122	10nt ed5	0	GAGGAATAAC	26	GAGGAATAAC	GAGGAATAAC	GAGGAATAACATGTCACCACAAACAGAGACTAAAGC	67.849	41.667	0	0	31.2	3.51	23.8492	Temperature too high;	GAGGAATAAC	GAGGAATAAC	GAGGAATAACGTAAAATCAAGTCCACCGCG	66.901	46.667	0	0	0	6.46	16.9005	Temperature too high; Contains too-long poly nucleotide tract;	0	0	0	40.7497
86	10nt ed5	0	CGGAACTTAT	23	CGGAACTTAT	CGGAACTTAT	CGGAACTTATATGTCACCACAAACAGAGACTAAAGC	67.696	41.667	0	8.68	31.2	3.51	23.6962	Temperature too high;	CGGAACTTAT	CGGAACTTAT	CGGAACTTATGTAAAATCAAGTCCACCGCG	67.084	46.667	0	3.54	25.56	6.46	17.0841	Temperature too high; Contains too-long poly nucleotide tract;	0	3.62	0	40.7803
133	10nt ed5	0	GTAACTCGTT	22	GTAACTCGTT	GTAACTCGTT	GTAACTCGTTATGTCACCACAAACAGAGACTAAAGC	67.775	41.667	0	7.07	31.2	3.51	23.7751	Temperature too high;	GTAACTCGTT	GTAACTCGTT	GTAACTCGTTGTAAAATCAAGTCCACCGCG	67.181	46.667	0	0	0	6.46	17.1809	Temperature too high; Contains too-long poly nucleotide tract;	0	0	0	40.956
111	10nt ed5	0	GATCACATCA	23	GATCACATCA	GATCACATCA	GATCACATCAATGTCACCACAAACAGAGACTAAAGC	68.176	41.667	0	0	34.99	3.51	24.1758	Temperature too high;	GATCACATCA	GATCACATCA	GATCACATCAGTAAAATCAAGTCCACCGCG	66.921	46.667	0	0	0	6.46	16.9205	Temperature too high; Contains too-long poly nucleotide tract;	0	0	0	41.0963
82	10nt ed5	0	CCATATGAAC	23	CCATATGAAC	CCATATGAAC	CCATATGAACATGTCACCACAAACAGAGACTAAAGC	68.046	41.667	0	0.44	35.09	3.51	24.0461	Temperature too high;	CCATATGAAC	CCATATGAAC	CCATATGAACGTAAAATCAAGTCCACCGCG	67.132	46.667	0	0.44	0	6.46	17.1322	Temperature too high; Contains too-long poly nucleotide tract;	0	0.44	0	41.1782
66	10nt ed5	0	CAACCTAACA	23	CAACCTAACA	CAACCTAACA	CAACCTAACAATGTCACCACAAACAGAGACTAAAGC	68.266	41.667	0	0	31.2	3.51	24.2664	Temperature too high;	CAACCTAACA	CAACCTAACA	CAACCTAACAGTAAAATCAAGTCCACCGCG	67.026	46.667	0	0	0	6.46	17.0257	Temperature too high; Contains too-long poly nucleotide tract;	0	0	0	41.2921
78	10nt ed5	0	CATTGAGTGT	23	CATTGAGTGT	CATTGAGTGT	CATTGAGTGTATGTCACCACAAACAGAGACTAAAGC	67.977	41.667	0	5.19	36.21	3.51	23.9769	Temperature too high;	CATTGAGTGT	CATTGAGTGT	CATTGAGTGTGTAAAATCAAGTCCACCGCG	67.415	46.667	0	0	0	6.46	17.4147	Temperature too high; Contains too-long poly nucleotide tract;	0	0	0	41.3916
79	10nt ed5	0	CCACAATCAT	22	CCACAATCAT	CCACAATCAT	CCACAATCATATGTCACCACAAACAGAGACTAAAGC	68.046	41.667	0	0	31.2	3.51	24.0461	Temperature too high;	CCACAATCAT	CCACAATCAT	CCACAATCATGTAAAATCAAGTCCACCGCG	67.494	46.667	0	0	32.98	6.46	17.4938	Temperature too high; Contains too-long poly nucleotide tract;	0	0	0	41.5399
68	10nt ed5	0	CAAGAAGTTC	24	CAAGAAGTTC	CAAGAAGTTC	CAAGAAGTTCATGTCACCACAAACAGAGACTAAAGC	68.249	41.667	0	0	31.2	3.51	24.2489	Temperature too high;	CAAGAAGTTC	CAAGAAGTTC	CAAGAAGTTCGTAAAATCAAGTCCACCGCG	67.375	46.667	0	0	0	6.46	17.3751	Temperature too high; Contains too-long poly nucleotide tract;	0	0	0	41.624
41	10nt ed5	0	ACTTAGAAGG	25	ACTTAGAAGG	ACTTAGAAGG	ACTTAGAAGGATGTCACCACAAACAGAGACTAAAGC	68.37	41.667	0	0	31.2	3.51	24.3695	Temperature too high;	ACTTAGAAGG	ACTTAGAAGG	ACTTAGAAGGGTAAAATCAAGTCCACCGCG	67.525	46.667	0	0	0	6.46	17.5252	Temperature too high; Contains too-long poly nucleotide tract;	0	0	0	41.8948
35	10nt ed5	0	AAGATCTGAG	25	AAGATCTGAG	AAGATCTGAG	AAGATCTGAGATGTCACCACAAACAGAGACTAAAGC	68.393	41.667	0	8.14	35.47	3.51	24.3931	Temperature too high;	AAGATCTGAG	AAGATCTGAG	AAGATCTGAGGTAAAATCAAGTCCACCGCG	67.555	46.667	0	0	0	6.46	17.5553	Temperature too high; Contains too-long poly nucleotide tract;	0	0	0	41.9484
61	10nt ed5	0	ATCTCGATAC	22	ATCTCGATAC	ATCTCGATAC	ATCTCGATACATGTCACCACAAACAGAGACTAAAGC	68.425	41.667	0	0	31.2	3.51	24.425	Temperature too high;	ATCTCGATAC	ATCTCGATAC	ATCTCGATACGTAAAATCAAGTCCACCGCG	67.575	46.667	0	0	0	6.46	17.5747	Temperature too high; Contains too-long poly nucleotide tract;	0	0	0	41.9997
160	10nt ed5	0	TTACAGTACG	23	TTACAGTACG	TTACAGTACG	TTACAGTACGATGTCACCACAAACAGAGACTAAAGC	68.474	41.667	0	0	31.2	3.51	24.4744	Temperature too high;	TTACAGTACG	TTACAGTACG	TTACAGTACGGTAAAATCAAGTCCACCGCG	67.661	46.667	0	9.94	29.65	6.46	17.6611	Temperature too high; Contains too-long poly nucleotide tract;	0	0	0	42.1355
84	10nt ed5	0	CGCTTAATTG	22	CGCTTAATTG	CGCTTAATTG	CGCTTAATTGATGTCACCACAAACAGAGACTAAAGC	68.479	41.667	0	0	31.2	3.51	24.4787	Temperature too high;	CGCTTAATTG	CGCTTAATTG	CGCTTAATTGGTAAAATCAAGTCCACCGCG	67.675	46.667	0	0	0	6.46	17.675	Temperature too high; Contains too-long poly nucleotide tract;	0	0	0	42.1537
158	10nt ed5	0	TGTTACCTAC	21	TGTTACCTAC	TGTTACCTAC	TGTTACCTACATGTCACCACAAACAGAGACTAAAGC	68.502	41.667	0	3.85	31.2	3.51	24.5023	Temperature too high;	TGTTACCTAC	TGTTACCTAC	TGTTACCTACGTAAAATCAAGTCCACCGCG	67.661	46.667	0	0	31.35	6.46	17.6611	Temperature too high; Contains too-long poly nucleotide tract;	0	0	0	42.1634
45	10nt ed5	0	AGAATCGGTA	25	AGAATCGGTA	AGAATCGGTA	AGAATCGGTAATGTCACCACAAACAGAGACTAAAGC	68.717	41.667	0	0	34.68	3.51	24.7167	Temperature too high;	AGAATCGGTA	AGAATCGGTA	AGAATCGGTAGTAAAATCAAGTCCACCGCG	67.55	46.667	0	0	0	6.46	17.5502	Temperature too high; Contains too-long poly nucleotide tract;	0	0	0	42.2669
34	10nt ed5	0	ACCTTACCTT	20	ACCTTACCTT	ACCTTACCTT	ACCTTACCTTATGTCACCACAAACAGAGACTAAAGC	68.387	41.667	0	0	31.2	3.51	24.3875	Temperature too high;	ACCTTACCTT	ACCTTACCTT	ACCTTACCTTGTAAAATCAAGTCCACCGCG	67.889	46.667	0	0	38.29	6.46	17.889	Temperature too high; Contains too-long poly nucleotide tract;	0	0	0	42.2765
149	10nt ed5	0	TCCAATACTC	21	TCCAATACTC	TCCAATACTC	TCCAATACTCATGTCACCACAAACAGAGACTAAAGC	68.556	41.667	0	0	31.2	3.51	24.5559	Temperature too high;	TCCAATACTC	TCCAATACTC	TCCAATACTCGTAAAATCAAGTCCACCGCG	67.723	46.667	0	0	0	6.46	17.7225	Temperature too high; Contains too-long poly nucleotide tract;	0	0	0	42.2784
53	10nt ed5	0	AGGAGAATCA	26	AGGAGAATCA	AGGAGAATCA	AGGAGAATCAATGTCACCACAAACAGAGACTAAAGC	68.728	41.667	0	0	31.2	3.51	24.7281	Temperature too high;	AGGAGAATCA	AGGAGAATCA	AGGAGAATCAGTAAAATCAAGTCCACCGCG	67.555	46.667	0	0	0	6.46	17.5553	Temperature too high; Contains too-long poly nucleotide tract;	0	0	0	42.2833
12	10nt ed5	0	AATACCAGGA	25	AATACCAGGA	AATACCAGGA	AATACCAGGAATGTCACCACAAACAGAGACTAAAGC	68.747	41.667	0	0	31.2	3.51	24.7468	Temperature too high;	AATACCAGGA	AATACCAGGA	AATACCAGGAGTAAAATCAAGTCCACCGCG	67.574	46.667	0	0	34.39	6.46	17.5744	Temperature too high; Contains too-long poly nucleotide tract;	0	0	0	42.3212
14	10nt ed5	0	AATAGGTAGC	25	AATAGGTAGC	AATAGGTAGC	AATAGGTAGCATGTCACCACAAACAGAGACTAAAGC	68.6	41.667	0	9.4	31.2	3.51	24.6004	Temperature too high;	AATAGGTAGC	AATAGGTAGC	AATAGGTAGCGTAAAATCAAGTCCACCGCG	67.774	46.667	0	0	0	6.46	17.7744	Temperature too high; Contains too-long poly nucleotide tract;	0	0	0	42.3748
165	10nt ed5	0	TTCTCCTTCA	19	TTCTCCTTCA	TTCTCCTTCA	TTCTCCTTCAATGTCACCACAAACAGAGACTAAAGC	68.831	41.667	0	0	31.2	3.51	24.8306	Temperature too high;	TTCTCCTTCA	TTCTCCTTCA	TTCTCCTTCAGTAAAATCAAGTCCACCGCG	67.68	46.667	0	0	0	6.46	17.6798	Temperature too high; Contains too-long poly nucleotide tract;	0	0	0	42.5105
58	10nt ed5	0	AGTCCTTAAC	22	AGTCCTTAAC	AGTCCTTAAC	AGTCCTTAACATGTCACCACAAACAGAGACTAAAGC	68.674	41.667	0	0	31.2	3.51	24.6741	Temperature too high;	AGTCCTTAAC	AGTCCTTAAC	AGTCCTTAACGTAAAATCAAGTCCACCGCG	67.862	46.667	0	0	0	6.46	17.8619	Temperature too high; Contains too-long poly nucleotide tract;	0	0	0	42.536
152	10nt ed5	0	TCGATCAACT	22	TCGATCAACT	TCGATCAACT	TCGATCAACTATGTCACCACAAACAGAGACTAAAGC	68.527	41.667	0	0	31.38	3.51	24.5275	Temperature too high;	TCGATCAACT	TCGATCAACT	TCGATCAACTGTAAAATCAAGTCCACCGCG	68.061	46.667	0	0	0	6.46	18.0613	Temperature too high; Contains too-long poly nucleotide tract;	0	0	0	42.5888
52	10nt ed5	0	AGCTGTCATA	23	AGCTGTCATA	AGCTGTCATA	AGCTGTCATAATGTCACCACAAACAGAGACTAAAGC	68.885	41.667	0	0	31.2	3.51	24.8851	Temperature too high;	AGCTGTCATA	AGCTGTCATA	AGCTGTCATAGTAAAATCAAGTCCACCGCG	67.748	46.667	0	0	0	6.46	17.7484	Temperature too high; Contains too-long poly nucleotide tract;	0	0	0	42.6335
163	10nt ed5	0	TGTCATTCCT	20	TGTCATTCCT	TGTCATTCCT	TGTCATTCCTATGTCACCACAAACAGAGACTAAAGC	68.556	41.667	0	0	31.38	3.51	24.5559	Temperature too high;	TGTCATTCCT	TGTCATTCCT	TGTCATTCCTGTAAAATCAAGTCCACCGCG	68.09	46.667	0	0	0	6.46	18.0903	Temperature too high; Contains too-long poly nucleotide tract;	0	0	0	42.6462
13	10nt ed5	0	AATACTTCCG	22	AATACTTCCG	AATACTTCCG	AATACTTCCGATGTCACCACAAACAGAGACTAAAGC	68.717	41.667	0	0	31.2	3.51	24.7167	Temperature too high;	AATACTTCCG	AATACTTCCG	AATACTTCCGGTAAAATCAAGTCCACCGCG	67.944	46.667	0	0.58	30.22	6.46	17.9437	Temperature too high; Contains too-long poly nucleotide tract;	0	0	0	42.6604
48	10nt ed5	0	ACGGTTCTAA	23	ACGGTTCTAA	ACGGTTCTAA	ACGGTTCTAAATGTCACCACAAACAGAGACTAAAGC	68.977	41.667	0	0	31.2	3.51	24.9772	Temperature too high;	ACGGTTCTAA	ACGGTTCTAA	ACGGTTCTAAGTAAAATCAAGTCCACCGCG	67.862	46.667	0	3.43	0	6.46	17.8619	Temperature too high; Contains too-long poly nucleotide tract;	0	0	0	42.8391
10	10nt ed5	0	AACCGAGTTA	24	AACCGAGTTA	AACCGAGTTA	AACCGAGTTAATGTCACCACAAACAGAGACTAAAGC	68.977	41.667	0	0	31.2	3.51	24.9772	Temperature too high;	AACCGAGTTA	AACCGAGTTA	AACCGAGTTAGTAAAATCAAGTCCACCGCG	67.862	46.667	0	0	25.51	6.46	17.8619	Temperature too high; Contains too-long poly nucleotide tract;	0	0	0	42.8391
23	10nt ed5	0	ACACGTATGA	24	ACACGTATGA	ACACGTATGA	ACACGTATGAATGTCACCACAAACAGAGACTAAAGC	68.987	41.667	0	0	31.2	3.51	24.9866	Temperature too high;	ACACGTATGA	ACACGTATGA	ACACGTATGAGTAAAATCAAGTCCACCGCG	67.878	46.667	0	0	27.77	6.46	17.8776	Temperature too high; Contains too-long poly nucleotide tract;	0	0	0	42.8642
157	10nt ed5	0	TGTGGTTATG	23	TGTGGTTATG	TGTGGTTATG	TGTGGTTATGATGTCACCACAAACAGAGACTAAAGC	68.859	41.667	0	14.16	37.4	3.51	24.8595	Temperature too high;	TGTGGTTATG	TGTGGTTATG	TGTGGTTATGGTAAAATCAAGTCCACCGCG	68.111	46.667	0	6.7	30.59	6.46	18.1107	Temperature too high; Contains too-long poly nucleotide tract;	13.22	17.06	0	42.9702
43	10nt ed5	0	AGAACCACAT	24	AGAACCACAT	AGAACCACAT	AGAACCACATATGTCACCACAAACAGAGACTAAAGC	68.716	41.667	0	0	31.2	3.51	24.7156	Temperature too high;	AGAACCACAT	AGAACCACAT	AGAACCACATGTAAAATCAAGTCCACCGCG	68.279	46.667	0	0.39	0	6.46	18.279	Temperature too high; Contains too-long poly nucleotide tract;	0	0	0	42.9946
15	10nt ed5	0	AATCGAACCT	23	AATCGAACCT	AATCGAACCT	AATCGAACCTATGTCACCACAAACAGAGACTAAAGC	68.717	41.667	0	0	31.38	3.51	24.7167	Temperature too high;	AATCGAACCT	AATCGAACCT	AATCGAACCTGTAAAATCAAGTCCACCGCG	68.283	46.667	0	0	0	6.46	18.2826	Temperature too high; Contains too-long poly nucleotide tract;	0	0	0	42.9993
63	10nt ed5	0	ATGGAAGGAA	27	ATGGAAGGAA	ATGGAAGGAA	ATGGAAGGAAATGTCACCACAAACAGAGACTAAAGC	69.064	41.667	0	0	31.2	3.51	25.0639	Temperature too high;	ATGGAAGGAA	ATGGAAGGAA	ATGGAAGGAAGTAAAATCAAGTCCACCGCG	67.952	46.667	0	0	25.53	6.46	17.9516	Temperature too high; Contains too-long poly nucleotide tract;	0	0	0	43.0155
36	10nt ed5	0	AAGCTTATCC	22	AAGCTTATCC	AAGCTTATCC	AAGCTTATCCATGTCACCACAAACAGAGACTAAAGC	68.917	41.667	5.42	5.42	31.2	3.51	24.9167	Temperature too high;	AAGCTTATCC	AAGCTTATCC	AAGCTTATCCGTAAAATCAAGTCCACCGCG	68.147	46.667	0	0	0	6.46	18.147	Temperature too high; Contains too-long poly nucleotide tract;	0.21	0	0	43.0637
101	10nt ed5	0	CTAACGATCG	25	CTAACGATCG	CTAACGATCG	CTAACGATCGATGTCACCACAAACAGAGACTAAAGC	69.008	44.444	0	7.2	31.2	3.51	25.0082	Temperature too high;	CTAACGATCG	CTAACGATCG	CTAACGATCGGTAAAATCAAGTCCACCGCG	68.304	50	0	0	27.88	6.46	18.3036	Temperature too high; Contains too-long poly nucleotide tract;	0	0	0	43.3118
159	10nt ed5	0	TTAAGCCTTG	22	TTAAGCCTTG	TTAAGCCTTG	TTAAGCCTTGATGTCACCACAAACAGAGACTAAAGC	69.019	41.667	0	0	31.2	3.51	25.0188	Temperature too high;	TTAAGCCTTG	TTAAGCCTTG	TTAAGCCTTGGTAAAATCAAGTCCACCGCG	68.3	46.667	0	0	35.92	6.46	18.2999	Temperature too high; Contains too-long poly nucleotide tract;	1.88	4.25	0	43.3186
98	10nt ed5	0	CCTGTTAGCT	23	CCTGTTAGCT	CCTGTTAGCT	CCTGTTAGCTATGTCACCACAAACAGAGACTAAAGC	68.885	44.444	1.86	6.82	37.01	3.51	24.8854	Temperature too high;	CCTGTTAGCT	CCTGTTAGCT	CCTGTTAGCTGTAAAATCAAGTCCACCGCG	68.483	50	0	0	0	6.46	18.4834	Temperature too high; Contains too-long poly nucleotide tract;	0	0	0	43.3688
134	10nt ed5	0	GTAAGCGAGA	28	GTAAGCGAGA	GTAAGCGAGA	GTAAGCGAGAATGTCACCACAAACAGAGACTAAAGC	69.309	44.444	0	0	31.2	3.51	25.309	Temperature too high;	GTAAGCGAGA	GTAAGCGAGA	GTAAGCGAGAGTAAAATCAAGTCCACCGCG	68.269	50	0	0.92	32.26	6.46	18.2693	Temperature too high; Contains too-long poly nucleotide tract;	0	0	0	43.5783
17	10nt ed5	0	AATGCACTAC	23	AATGCACTAC	AATGCACTAC	AATGCACTACATGTCACCACAAACAGAGACTAAAGC	69.187	41.667	0	0	35.19	3.51	25.1867	Temperature too high;	AATGCACTAC	AATGCACTAC	AATGCACTACGTAAAATCAAGTCCACCGCG	68.469	46.667	0	0	0	6.46	18.4693	Temperature too high; Contains too-long poly nucleotide tract;	0	0	0	43.656
6	10nt ed5	0	AACACGGAAT	25	AACACGGAAT	AACACGGAAT	AACACGGAATATGTCACCACAAACAGAGACTAAAGC	69.018	41.667	0	0	31.2	3.51	25.0185	Temperature too high;	AACACGGAAT	AACACGGAAT	AACACGGAATGTAAAATCAAGTCCACCGCG	68.64	46.667	0	0	37.06	6.46	18.6396	Temperature too high; Contains too-long poly nucleotide tract;	0	0	0	43.658
123	10nt ed5	0	GAGTTGGATC	26	GAGTTGGATC	GAGTTGGATC	GAGTTGGATCATGTCACCACAAACAGAGACTAAAGC	69.199	44.444	0	1.57	31.2	3.51	25.1986	Temperature too high;	GAGTTGGATC	GAGTTGGATC	GAGTTGGATCGTAAAATCAAGTCCACCGCG	68.486	50	0	0	0	6.46	18.4859	Temperature too high; Contains too-long poly nucleotide tract;	0	0	0	43.6845
144	10nt ed5	0	GTGTACCATG	25	GTGTACCATG	GTGTACCATG	GTGTACCATGATGTCACCACAAACAGAGACTAAAGC	69.186	44.444	0	0	31.2	3.51	25.1856	Temperature too high;	GTGTACCATG	GTGTACCATG	GTGTACCATGGTAAAATCAAGTCCACCGCG	68.505	50	0	16.77	28.26	6.46	18.5046	Temperature too high; Contains too-long poly nucleotide tract;	8.91	5.61	0	43.6903
19	10nt ed5	0	AATTAAGGCC	24	AATTAAGGCC	AATTAAGGCC	AATTAAGGCCATGTCACCACAAACAGAGACTAAAGC	69.252	41.667	0	0	31.2	3.51	25.2523	Temperature too high;	AATTAAGGCC	AATTAAGGCC	AATTAAGGCCGTAAAATCAAGTCCACCGCG	68.54	46.667	0	0	0	6.46	18.5403	Temperature too high; Contains too-long poly nucleotide tract;	0	0	0	43.7926
124	10nt ed5	0	GGCATCCTAA	25	GGCATCCTAA	GGCATCCTAA	GGCATCCTAAATGTCACCACAAACAGAGACTAAAGC	69.418	44.444	0	0	34.93	3.51	25.4178	Temperature too high;	GGCATCCTAA	GGCATCCTAA	GGCATCCTAAGTAAAATCAAGTCCACCGCG	68.383	50	0	0	0	6.46	18.3834	Temperature too high; Contains too-long poly nucleotide tract;	0	0	0	43.8013
92	10nt ed5	0	CGTCAAGAAG	27	CGTCAAGAAG	CGTCAAGAAG	CGTCAAGAAGATGTCACCACAAACAGAGACTAAAGC	69.278	44.444	0	0	31.2	3.51	25.278	Temperature too high;	CGTCAAGAAG	CGTCAAGAAG	CGTCAAGAAGGTAAAATCAAGTCCACCGCG	68.62	50	0	0	0	6.46	18.6198	Temperature too high; Contains too-long poly nucleotide tract;	0	0	0	43.8978
128	10nt ed5	0	GCTAAGTCAC	25	GCTAAGTCAC	GCTAAGTCAC	GCTAAGTCACATGTCACCACAAACAGAGACTAAAGC	69.311	44.444	10.23	10.23	31.2	3.51	25.3106	Temperature too high;	GCTAAGTCAC	GCTAAGTCAC	GCTAAGTCACGTAAAATCAAGTCCACCGCG	68.622	50	0	0	0	6.46	18.6216	Temperature too high; Contains too-long poly nucleotide tract;	2.06	0	0	43.9322
65	10nt ed5	0	ATTGTGTTCC	21	ATTGTGTTCC	ATTGTGTTCC	ATTGTGTTCCATGTCACCACAAACAGAGACTAAAGC	69.334	41.667	0	8.84	26.89	3.51	25.3338	Temperature too high;	ATTGTGTTCC	ATTGTGTTCC	ATTGTGTTCCGTAAAATCAAGTCCACCGCG	68.64	46.667	0	0	0	6.46	18.6396	Temperature too high; Contains too-long poly nucleotide tract;	0	0	0	43.9733
137	10nt ed5	0	GGATACAAGC	27	GGATACAAGC	GGATACAAGC	GGATACAAGCATGTCACCACAAACAGAGACTAAAGC	69.385	44.444	0	6.81	37.6	3.51	25.3846	Temperature too high;	GGATACAAGC	GGATACAAGC	GGATACAAGCGTAAAATCAAGTCCACCGCG	68.705	50	0	0	0	6.46	18.7054	Temperature too high; Contains too-long poly nucleotide tract;	0	0	0	44.09
18	10nt ed5	0	AATGCTGGTT	23	AATGCTGGTT	AATGCTGGTT	AATGCTGGTTATGTCACCACAAACAGAGACTAAAGC	69.219	41.667	0	0	36.79	3.51	25.2194	Temperature too high;	AATGCTGGTT	AATGCTGGTT	AATGCTGGTTGTAAAATCAAGTCCACCGCG	68.875	46.667	0	0	0	6.46	18.8747	Temperature too high; Contains too-long poly nucleotide tract;	1.27	9.3	0	44.0941
70	10nt ed5	0	CAAGGTTGGA	27	CAAGGTTGGA	CAAGGTTGGA	CAAGGTTGGAATGTCACCACAAACAGAGACTAAAGC	69.645	44.444	0	0	33.55	3.51	25.6451	Temperature too high;	CAAGGTTGGA	CAAGGTTGGA	CAAGGTTGGAGTAAAATCAAGTCCACCGCG	68.654	50	0	0.69	38.96	6.46	18.654	Temperature too high; Contains too-long poly nucleotide tract;	0	0	0	44.2991
107	10nt ed5	0	CTTAGCTGCA	24	CTTAGCTGCA	CTTAGCTGCA	CTTAGCTGCAATGTCACCACAAACAGAGACTAAAGC	69.663	44.444	0	0	31.2	3.51	25.6625	Temperature too high;	CTTAGCTGCA	CTTAGCTGCA	CTTAGCTGCAGTAAAATCAAGTCCACCGCG	68.682	50	0	0	0	6.46	18.6824	Temperature too high; Contains too-long poly nucleotide tract;	0	0	0	44.3449
89	10nt ed5	0	CGGTCATGTT	24	CGGTCATGTT	CGGTCATGTT	CGGTCATGTTATGTCACCACAAACAGAGACTAAAGC	69.338	44.444	2.18	9.67	32.25	3.51	25.3384	Temperature too high;	CGGTCATGTT	CGGTCATGTT	CGGTCATGTTGTAAAATCAAGTCCACCGCG	69.02	50	0	0.18	0	6.46	19.0202	Temperature too high; Contains too-long poly nucleotide tract;	0.31	0.88	0	44.3586
127	10nt ed5	0	GGCGTTACAT	25	GGCGTTACAT	GGCGTTACAT	GGCGTTACATATGTCACCACAAACAGAGACTAAAGC	69.369	44.444	0	0.15	31.2	3.51	25.3695	Temperature too high;	GGCGTTACAT	GGCGTTACAT	GGCGTTACATGTAAAATCAAGTCCACCGCG	69.057	50	11.92	18.46	25.82	6.46	19.0571	Temperature too high; Contains too-long poly nucleotide tract;	6.9	0	0	44.4266
3	10nt ed5	0	AACAACAACC	24	AACAACAACC	AACAACAACC	AACAACAACCATGTCACCACAAACAGAGACTAAAGC	69.593	41.667	0	0	34.62	3.51	25.5932	Temperature too high;	AACAACAACC	AACAACAACC	AACAACAACCGTAAAATCAAGTCCACCGCG	68.946	46.667	0	0	0	6.46	18.9461	Temperature too high; Contains too-long poly nucleotide tract;	0	0	0	44.5393
115	10nt ed5	0	GCAATTACCG	25	GCAATTACCG	GCAATTACCG	GCAATTACCGATGTCACCACAAACAGAGACTAAAGC	69.68	44.444	0	0	31.2	3.51	25.6797	Temperature too high;	GCAATTACCG	GCAATTACCG	GCAATTACCGGTAAAATCAAGTCCACCGCG	69.095	50	0	11.79	26.91	6.46	19.0946	Temperature too high; Contains too-long poly nucleotide tract;	0	0	0	44.7743
150	10nt ed5	0	TCCAGGAAGA	27	TCCAGGAAGA	TCCAGGAAGA	TCCAGGAAGAATGTCACCACAAACAGAGACTAAAGC	69.908	44.444	0	0	31.2	3.51	25.9084	Temperature too high;	TCCAGGAAGA	TCCAGGAAGA	TCCAGGAAGAGTAAAATCAAGTCCACCGCG	68.954	50	0	0	0	6.46	18.9536	Temperature too high; Contains too-long poly nucleotide tract;	0	0	0	44.862
50	10nt ed5	0	AGCTACTGTC	24	AGCTACTGTC	AGCTACTGTC	AGCTACTGTCATGTCACCACAAACAGAGACTAAAGC	69.883	44.444	10.47	10.47	39.87	3.51	25.8829	Temperature too high;	AGCTACTGTC	AGCTACTGTC	AGCTACTGTCGTAAAATCAAGTCCACCGCG	69.286	50	0	0	0	6.46	19.2857	Temperature too high; Contains too-long poly nucleotide tract;	4.51	0	0	45.1686
105	10nt ed5	0	CTGGACTCTC	25	CTGGACTCTC	CTGGACTCTC	CTGGACTCTCATGTCACCACAAACAGAGACTAAAGC	70.047	47.222	0	5.79	32.39	3.51	26.0472	Temperature too high;	CTGGACTCTC	CTGGACTCTC	CTGGACTCTCGTAAAATCAAGTCCACCGCG	69.481	53.333	0.98	9.87	0	6.46	19.4812	Temperature too high; Contains too-long poly nucleotide tract;	3.17	4.55	0	45.5283
24	10nt ed5	0	ACACTCCAAG	25	ACACTCCAAG	ACACTCCAAG	ACACTCCAAGATGTCACCACAAACAGAGACTAAAGC	70.032	44.444	0	0	31.2	3.51	26.0322	Temperature too high;	ACACTCCAAG	ACACTCCAAG	ACACTCCAAGGTAAAATCAAGTCCACCGCG	69.502	50	0	0	0	6.46	19.5018	Temperature too high; Contains too-long poly nucleotide tract;	0	0	0	45.5339
49	10nt ed5	0	ACGTAGCGAT	26	ACGTAGCGAT	ACGTAGCGAT	ACGTAGCGATATGTCACCACAAACAGAGACTAAAGC	69.902	44.444	0	0.73	31.2	3.51	25.9015	Temperature too high;	ACGTAGCGAT	ACGTAGCGAT	ACGTAGCGATGTAAAATCAAGTCCACCGCG	69.683	50	0	0	30.67	6.46	19.6829	Temperature too high; Contains too-long poly nucleotide tract;	0	0	0	45.5844
56	10nt ed5	0	AGTATAGCGC	26	AGTATAGCGC	AGTATAGCGC	AGTATAGCGCATGTCACCACAAACAGAGACTAAAGC	70.105	44.444	0	2.49	31.2	3.51	26.1047	Temperature too high;	AGTATAGCGC	AGTATAGCGC	AGTATAGCGCGTAAAATCAAGTCCACCGCG	69.55	50	6.31	6.31	0	6.46	19.5501	Temperature too high; Contains too-long poly nucleotide tract;	0	0	0	45.6549
156	10nt ed5	0	TTGTCTCGAC	23	TTGTCTCGAC	TTGTCTCGAC	TTGTCTCGACATGTCACCACAAACAGAGACTAAAGC	70.132	44.444	0.25	13.1	37.82	3.51	26.1316	Temperature too high;	TTGTCTCGAC	TTGTCTCGAC	TTGTCTCGACGTAAAATCAAGTCCACCGCG	69.583	50	0	0	0	6.46	19.5825	Temperature too high; Contains too-long poly nucleotide tract;	0	2.31	0	45.7141
30	10nt ed5	0	ACCGCCTATT	23	ACCGCCTATT	ACCGCCTATT	ACCGCCTATTATGTCACCACAAACAGAGACTAAAGC	69.976	44.444	0	0	31.2	3.51	25.9764	Temperature too high;	ACCGCCTATT	ACCGCCTATT	ACCGCCTATTGTAAAATCAAGTCCACCGCG	69.768	50	0	0	0	6.46	19.7682	Temperature too high; Contains too-long poly nucleotide tract;	0	0	0	45.7445
136	10nt ed5	0	GGAGCTATGG	29	GGAGCTATGG	GGAGCTATGG	GGAGCTATGGATGTCACCACAAACAGAGACTAAAGC	70.155	47.222	0	1.43	39.45	3.51	26.155	Temperature too high;	GGAGCTATGG	GGAGCTATGG	GGAGCTATGGGTAAAATCAAGTCCACCGCG	69.65	53.333	0	0	0	6.46	19.6498	Temperature too high; Contains too-long poly nucleotide tract;	0	0	0	45.8048
22	10nt ed5	0	ACAAGAGCAG	28	ACAAGAGCAG	ACAAGAGCAG	ACAAGAGCAGATGTCACCACAAACAGAGACTAAAGC	70.196	44.444	0	0	31.2	3.51	26.1964	Temperature too high;	ACAAGAGCAG	ACAAGAGCAG	ACAAGAGCAGGTAAAATCAAGTCCACCGCG	69.699	50	0	0	0	6.46	19.6989	Temperature too high; Contains too-long poly nucleotide tract;	0	0	0	45.8953
130	10nt ed5	0	GGTACGCTCT	26	GGTACGCTCT	GGTACGCTCT	GGTACGCTCTATGTCACCACAAACAGAGACTAAAGC	70.058	47.222	0	0	32.23	3.51	26.0585	Temperature too high;	GGTACGCTCT	GGTACGCTCT	GGTACGCTCTGTAAAATCAAGTCCACCGCG	69.868	53.333	0	0	29.81	6.46	19.8678	Temperature too high; Contains too-long poly nucleotide tract;	0	5.44	0	45.9263
27	10nt ed5	0	ACATGGTCCA	25	ACATGGTCCA	ACATGGTCCA	ACATGGTCCAATGTCACCACAAACAGAGACTAAAGC	70.41	44.444	0	2.78	31.2	3.51	26.4103	Temperature too high;	ACATGGTCCA	ACATGGTCCA	ACATGGTCCAGTAAAATCAAGTCCACCGCG	69.551	50	0	0	0	6.46	19.551	Temperature too high; Contains too-long poly nucleotide tract;	1.7	0	0	45.9613
87	10nt ed5	0	CGGATGAGGA	30	CGGATGAGGA	CGGATGAGGA	CGGATGAGGAATGTCACCACAAACAGAGACTAAAGC	70.416	47.222	0	0	31.2	3.51	26.4162	Temperature too high;	CGGATGAGGA	CGGATGAGGA	CGGATGAGGAGTAAAATCAAGTCCACCGCG	69.569	53.333	0	4.72	34.39	6.46	19.5693	Temperature too high; Contains too-long poly nucleotide tract;	0	0	0	45.9855
94	10nt ed5	0	CGATAGGCTG	28	CGATAGGCTG	CGATAGGCTG	CGATAGGCTGATGTCACCACAAACAGAGACTAAAGC	70.267	47.222	0.12	3.29	35.97	3.51	26.2672	Temperature too high;	CGATAGGCTG	CGATAGGCTG	CGATAGGCTGGTAAAATCAAGTCCACCGCG	69.788	53.333	0	0	0	6.46	19.7879	Temperature too high; Contains too-long poly nucleotide tract;	0	0	0	46.0551
51	10nt ed5	0	AGCTCAACGA	26	AGCTCAACGA	AGCTCAACGA	AGCTCAACGAATGTCACCACAAACAGAGACTAAAGC	70.487	44.444	0	0	31.2	3.51	26.4875	Temperature too high;	AGCTCAACGA	AGCTCAACGA	AGCTCAACGAGTAAAATCAAGTCCACCGCG	69.654	50	0	0	27.74	6.46	19.6544	Temperature too high; Contains too-long poly nucleotide tract;	0	0	0	46.1419
99	10nt ed5	0	CCTTGTCGAG	26	CCTTGTCGAG	CCTTGTCGAG	CCTTGTCGAGATGTCACCACAAACAGAGACTAAAGC	70.338	47.222	0	0	31.2	3.51	26.3384	Temperature too high;	CCTTGTCGAG	CCTTGTCGAG	CCTTGTCGAGGTAAAATCAAGTCCACCGCG	69.873	53.333	0	2.99	37.37	6.46	19.8727	Temperature too high; Contains too-long poly nucleotide tract;	0	0	0	46.2111
67	10nt ed5	0	CAACTGGAGG	29	CAACTGGAGG	CAACTGGAGG	CAACTGGAGGATGTCACCACAAACAGAGACTAAAGC	70.381	47.222	0	0	31.2	3.51	26.3815	Temperature too high;	CAACTGGAGG	CAACTGGAGG	CAACTGGAGGGTAAAATCAAGTCCACCGCG	69.919	53.333	0	0	21.01	6.46	19.9191	Temperature too high; Contains too-long poly nucleotide tract;	0	0	0	46.3006
96	10nt ed5	0	CACTCTGCCT	24	CACTCTGCCT	CACTCTGCCT	CACTCTGCCTATGTCACCACAAACAGAGACTAAAGC	70.232	47.222	1.75	17.07	31.38	3.51	26.232	Temperature too high;	CACTCTGCCT	CACTCTGCCT	CACTCTGCCTGTAAAATCAAGTCCACCGCG	70.071	53.333	0	0	0	6.46	20.071	Temperature too high; Contains too-long poly nucleotide tract;	0	0	0	46.3029
81	10nt ed5	0	CCAGCACCTA	26	CCAGCACCTA	CCAGCACCTA	CCAGCACCTAATGTCACCACAAACAGAGACTAAAGC	70.566	47.222	0	0	31.2	3.51	26.566	Temperature too high;	CCAGCACCTA	CCAGCACCTA	CCAGCACCTAGTAAAATCAAGTCCACCGCG	69.744	53.333	0	0	0	6.46	19.7436	Temperature too high; Contains too-long poly nucleotide tract;	0	0	0	46.3096
129	10nt ed5	0	GCTCCTCTTG	24	GCTCCTCTTG	GCTCCTCTTG	GCTCCTCTTGATGTCACCACAAACAGAGACTAAAGC	70.39	47.222	2.9	4.38	31.2	3.51	26.3897	Temperature too high;	GCTCCTCTTG	GCTCCTCTTG	GCTCCTCTTGGTAAAATCAAGTCCACCGCG	69.931	53.333	0	0	38.08	6.46	19.9306	Temperature too high; Contains too-long poly nucleotide tract;	10.98	10.9	0	46.3202
90	10nt ed5	0	CGTAATCCGG	27	CGTAATCCGG	CGTAATCCGG	CGTAATCCGGATGTCACCACAAACAGAGACTAAAGC	70.395	47.222	0	4.66	31.2	3.51	26.3949	Temperature too high;	CGTAATCCGG	CGTAATCCGG	CGTAATCCGGGTAAAATCAAGTCCACCGCG	69.941	53.333	0	0	0	6.46	19.9407	Temperature too high; Contains too-long poly nucleotide tract;	0	0	0	46.3356
73	10nt ed5	0	CCGACTAAGC	27	CCGACTAAGC	CCGACTAAGC	CCGACTAAGCATGTCACCACAAACAGAGACTAAAGC	70.522	47.222	0	2.19	31.2	3.51	26.5215	Temperature too high;	CCGACTAAGC	CCGACTAAGC	CCGACTAAGCGTAAAATCAAGTCCACCGCG	70.043	53.333	0	0	0	6.46	20.0425	Temperature too high; Contains too-long poly nucleotide tract;	0	0	0	46.564
26	10nt ed5	0	ACAGATTCGC	25	ACAGATTCGC	ACAGATTCGC	ACAGATTCGCATGTCACCACAAACAGAGACTAAAGC	70.529	44.444	0	0	31.2	3.51	26.5286	Temperature too high;	ACAGATTCGC	ACAGATTCGC	ACAGATTCGCGTAAAATCAAGTCCACCGCG	70.048	50	5	10.66	31.84	6.46	20.0483	Temperature too high; Contains too-long poly nucleotide tract;	0	0	0	46.577
106	10nt ed5	0	CTGGTTCCGT	25	CTGGTTCCGT	CTGGTTCCGT	CTGGTTCCGTATGTCACCACAAACAGAGACTAAAGC	70.36	47.222	0	0	26.36	3.51	26.3603	Temperature too high;	CTGGTTCCGT	CTGGTTCCGT	CTGGTTCCGTGTAAAATCAAGTCCACCGCG	70.223	53.333	0	0	0	6.46	20.2228	Temperature too high; Contains too-long poly nucleotide tract;	0	0	0	46.5831
154	10nt ed5	0	TTGGCCAAGA	26	TTGGCCAAGA	TTGGCCAAGA	TTGGCCAAGAATGTCACCACAAACAGAGACTAAAGC	70.709	44.444	0	14.84	31.2	3.51	26.7094	Temperature too high;	TTGGCCAAGA	TTGGCCAAGA	TTGGCCAAGAGTAAAATCAAGTCCACCGCG	69.908	50	0	14.84	0	6.46	19.9077	Temperature too high; Contains too-long poly nucleotide tract;	15.11	14.84	0	46.6171
120	10nt ed5	0	GCCTTCAGGA	27	GCCTTCAGGA	GCCTTCAGGA	GCCTTCAGGAATGTCACCACAAACAGAGACTAAAGC	70.724	47.222	0	0	29.91	3.51	26.7238	Temperature too high;	GCCTTCAGGA	GCCTTCAGGA	GCCTTCAGGAGTAAAATCAAGTCCACCGCG	69.931	53.333	0	0	34.39	6.46	19.9306	Temperature too high; Contains too-long poly nucleotide tract;	0	0	0	46.6543
5	10nt ed5	0	AACACACGTG	26	AACACACGTG	AACACACGTG	AACACACGTGATGTCACCACAAACAGAGACTAAAGC	70.585	44.444	0	17.25	35.32	3.51	26.5848	Temperature too high;	AACACACGTG	AACACACGTG	AACACACGTGGTAAAATCAAGTCCACCGCG	70.164	50	7.31	11.1	39.87	6.46	20.1639	Temperature too high; Contains too-long poly nucleotide tract;	0.77	12.2	0	46.7488
117	10nt ed5	0	GAACTCTCGC	26	GAACTCTCGC	GAACTCTCGC	GAACTCTCGCATGTCACCACAAACAGAGACTAAAGC	70.641	47.222	0	3.46	31.2	3.51	26.6406	Temperature too high;	GAACTCTCGC	GAACTCTCGC	GAACTCTCGCGTAAAATCAAGTCCACCGCG	70.184	53.333	5	5	0	6.46	20.1842	Temperature too high; Contains too-long poly nucleotide tract;	0	0	0	46.8248
4	10nt ed5	0	AACAAGCCGA	27	AACAAGCCGA	AACAAGCCGA	AACAAGCCGAATGTCACCACAAACAGAGACTAAAGC	70.821	44.444	0	0	31.2	3.51	26.821	Temperature too high;	AACAAGCCGA	AACAAGCCGA	AACAAGCCGAGTAAAATCAAGTCCACCGCG	70.048	50	0	0	0	6.46	20.0475	Temperature too high; Contains too-long poly nucleotide tract;	0	0	0	46.8685
97	10nt ed5	0	CCGTTCTTCC	23	CCGTTCTTCC	CCGTTCTTCC	CCGTTCTTCCATGTCACCACAAACAGAGACTAAAGC	70.671	47.222	0	0	31.2	3.51	26.6708	Temperature too high;	CCGTTCTTCC	CCGTTCTTCC	CCGTTCTTCCGTAAAATCAAGTCCACCGCG	70.216	53.333	0	0	0	6.46	20.216	Temperature too high; Contains too-long poly nucleotide tract;	0	0	0	46.8868
80	10nt ed5	0	CCACCTTGTC	24	CCACCTTGTC	CCACCTTGTC	CCACCTTGTCATGTCACCACAAACAGAGACTAAAGC	70.679	47.222	0	0	30.15	3.51	26.6787	Temperature too high;	CCACCTTGTC	CCACCTTGTC	CCACCTTGTCGTAAAATCAAGTCCACCGCG	70.223	53.333	0	1.24	33.84	6.46	20.2228	Temperature too high; Contains too-long poly nucleotide tract;	0	0	0	46.9014
16	10nt ed5	0	AATCGGCGAA	27	AATCGGCGAA	AATCGGCGAA	AATCGGCGAAATGTCACCACAAACAGAGACTAAAGC	70.854	44.444	0	2	31.2	3.51	26.8536	Temperature too high;	AATCGGCGAA	AATCGGCGAA	AATCGGCGAAGTAAAATCAAGTCCACCGCG	70.09	50	0	0	0	6.46	20.0901	Temperature too high; Contains too-long poly nucleotide tract;	0	0	0	46.9437
83	10nt ed5	0	CCATCGCAGT	26	CCATCGCAGT	CCATCGCAGT	CCATCGCAGTATGTCACCACAAACAGAGACTAAAGC	70.563	47.222	0	0	29.62	3.51	26.5625	Temperature too high;	CCATCGCAGT	CCATCGCAGT	CCATCGCAGTGTAAAATCAAGTCCACCGCG	70.461	53.333	0.63	0.63	0	6.46	20.4613	Temperature too high; Contains too-long poly nucleotide tract;	0	0	0	47.0238
114	10nt ed5	0	GATTCGCCAG	27	GATTCGCCAG	GATTCGCCAG	GATTCGCCAGATGTCACCACAAACAGAGACTAAAGC	70.719	47.222	0	0	31.2	3.51	26.7191	Temperature too high;	GATTCGCCAG	GATTCGCCAG	GATTCGCCAGGTAAAATCAAGTCCACCGCG	70.324	53.333	0	2.02	31.09	6.46	20.3239	Temperature too high; Contains too-long poly nucleotide tract;	0	0	0	47.043
119	10nt ed5	0	GCAGGCGTAT	28	GCAGGCGTAT	GCAGGCGTAT	GCAGGCGTATATGTCACCACAAACAGAGACTAAAGC	70.592	47.222	0	0	31.2	3.51	26.5923	Temperature too high;	GCAGGCGTAT	GCAGGCGTAT	GCAGGCGTATGTAAAATCAAGTCCACCGCG	70.497	53.333	0	0	0	6.46	20.4965	Temperature too high; Contains too-long poly nucleotide tract;	0	0	0	47.0889
21	10nt ed5	0	ACAACGCTTC	24	ACAACGCTTC	ACAACGCTTC	ACAACGCTTCATGTCACCACAAACAGAGACTAAAGC	70.783	44.444	4.63	4.63	31.2	3.51	26.7828	Temperature too high;	ACAACGCTTC	ACAACGCTTC	ACAACGCTTCGTAAAATCAAGTCCACCGCG	70.348	50	0	0	34.91	6.46	20.3477	Temperature too high; Contains too-long poly nucleotide tract;	0	0	0	47.1305
102	10nt ed5	0	CTACAACGGC	27	CTACAACGGC	CTACAACGGC	CTACAACGGCATGTCACCACAAACAGAGACTAAAGC	70.816	47.222	0	0	31.2	3.51	26.8155	Temperature too high;	CTACAACGGC	CTACAACGGC	CTACAACGGCGTAAAATCAAGTCCACCGCG	70.388	53.333	0	0	0	6.46	20.3882	Temperature too high; Contains too-long poly nucleotide tract;	0	0	0	47.2037
143	10nt ed5	0	GTGCACTGGA	28	GTGCACTGGA	GTGCACTGGA	GTGCACTGGAATGTCACCACAAACAGAGACTAAAGC	70.981	47.222	0	7.1	31.85	3.51	26.9808	Temperature too high;	GTGCACTGGA	GTGCACTGGA	GTGCACTGGAGTAAAATCAAGTCCACCGCG	70.24	53.333	0	7.1	28.06	6.46	20.2398	Temperature too high; Contains too-long poly nucleotide tract;	6.01	7.1	0	47.2206
9	10nt ed5	0	AACCATGCAC	25	AACCATGCAC	AACCATGCAC	AACCATGCACATGTCACCACAAACAGAGACTAAAGC	70.871	44.444	0	6.28	31.2	3.51	26.871	Temperature too high;	AACCATGCAC	AACCATGCAC	AACCATGCACGTAAAATCAAGTCCACCGCG	70.447	50	0	0	0	6.46	20.447	Temperature too high; Contains too-long poly nucleotide tract;	0	0	0	47.318
125	10nt ed5	0	GGCGAAGGTT	29	GGCGAAGGTT	GGCGAAGGTT	GGCGAAGGTTATGTCACCACAAACAGAGACTAAAGC	70.701	47.222	0	0	35.68	3.51	26.7006	Temperature too high;	GGCGAAGGTT	GGCGAAGGTT	GGCGAAGGTTGTAAAATCAAGTCCACCGCG	70.624	53.333	3.82	8.94	32.78	6.46	20.6237	Temperature too high; Contains too-long poly nucleotide tract;	0.82	7.17	0	47.3243
140	10nt ed5	0	GTTGCCACCT	25	GTTGCCACCT	GTTGCCACCT	GTTGCCACCTATGTCACCACAAACAGAGACTAAAGC	70.709	47.222	0	0	31.38	3.51	26.7086	Temperature too high;	GTTGCCACCT	GTTGCCACCT	GTTGCCACCTGTAAAATCAAGTCCACCGCG	70.633	53.333	0	0	0	6.46	20.6327	Temperature too high; Contains too-long poly nucleotide tract;	0	0	0	47.3413
151	10nt ed5	0	TCCTCACTGG	25	TCCTCACTGG	TCCTCACTGG	TCCTCACTGGATGTCACCACAAACAGAGACTAAAGC	70.953	47.222	0	0.58	35.48	3.51	26.9528	Temperature too high;	TCCTCACTGG	TCCTCACTGG	TCCTCACTGGGTAAAATCAAGTCCACCGCG	70.593	53.333	0	0	34.1	6.46	20.5928	Temperature too high; Contains too-long poly nucleotide tract;	0	0	0	47.5455
75	10nt ed5	0	CCGCCGTTAA	26	CCGCCGTTAA	CCGCCGTTAA	CCGCCGTTAAATGTCACCACAAACAGAGACTAAAGC	71.137	47.222	0	0	31.2	3.51	27.1374	Temperature too high;	CCGCCGTTAA	CCGCCGTTAA	CCGCCGTTAAGTAAAATCAAGTCCACCGCG	70.431	53.333	0	0	0	6.46	20.4311	Temperature too high; Contains too-long poly nucleotide tract;	0.38	0	0	47.5684
72	10nt ed5	0	CCGAATGCCA	27	CCGAATGCCA	CCGAATGCCA	CCGAATGCCAATGTCACCACAAACAGAGACTAAAGC	71.204	47.222	0	0	31.2	3.51	27.204	Temperature too high;	CCGAATGCCA	CCGAATGCCA	CCGAATGCCAGTAAAATCAAGTCCACCGCG	70.505	53.333	0	0	0	6.46	20.5048	Temperature too high; Contains too-long poly nucleotide tract;	0	0	0	47.7088
57	10nt ed5	0	AGTCCGACTG	27	AGTCCGACTG	AGTCCGACTG	AGTCCGACTGATGTCACCACAAACAGAGACTAAAGC	71.063	47.222	3.24	15.09	39.64	3.51	27.0627	Temperature too high;	AGTCCGACTG	AGTCCGACTG	AGTCCGACTGGTAAAATCAAGTCCACCGCG	70.727	53.333	0	0	34.14	6.46	20.7267	Temperature too high; Contains too-long poly nucleotide tract;	8.01	2.48	0	47.7894
153	10nt ed5	0	TCGCTGAGAG	28	TCGCTGAGAG	TCGCTGAGAG	TCGCTGAGAGATGTCACCACAAACAGAGACTAAAGC	71.065	47.222	0	0	31.2	3.51	27.0649	Temperature too high;	TCGCTGAGAG	TCGCTGAGAG	TCGCTGAGAGGTAAAATCAAGTCCACCGCG	70.731	53.333	0	0	0	6.46	20.7306	Temperature too high; Contains too-long poly nucleotide tract;	4.75	4.65	0	47.7954
100	10nt ed5	0	CGTGCCAATC	26	CGTGCCAATC	CGTGCCAATC	CGTGCCAATCATGTCACCACAAACAGAGACTAAAGC	71.165	47.222	0	3.88	31.2	3.51	27.1647	Temperature too high;	CGTGCCAATC	CGTGCCAATC	CGTGCCAATCGTAAAATCAAGTCCACCGCG	70.798	53.333	0	0	0	6.46	20.7976	Temperature too high; Contains too-long poly nucleotide tract;	0	0	0	47.9623
146	10nt ed5	0	TAGGCATCGG	28	TAGGCATCGG	TAGGCATCGG	TAGGCATCGGATGTCACCACAAACAGAGACTAAAGC	71.169	47.222	0	6.27	32.95	3.51	27.1695	Temperature too high;	TAGGCATCGG	TAGGCATCGG	TAGGCATCGGGTAAAATCAAGTCCACCGCG	70.852	53.333	0	0	0	6.46	20.8523	Temperature too high; Contains too-long poly nucleotide tract;	0	0	0	48.0218
95	10nt ed5	0	CGCCAGCATT	26	CGCCAGCATT	CGCCAGCATT	CGCCAGCATTATGTCACCACAAACAGAGACTAAAGC	71.054	47.222	0	0	31.2	3.51	27.0535	Temperature too high;	CGCCAGCATT	CGCCAGCATT	CGCCAGCATTGTAAAATCAAGTCCACCGCG	71.039	53.333	0	0	0	6.46	21.0393	Temperature too high; Contains too-long poly nucleotide tract;	0	0	0	48.0929
55	10nt ed5	0	AGGCGTGTAG	29	AGGCGTGTAG	AGGCGTGTAG	AGGCGTGTAGATGTCACCACAAACAGAGACTAAAGC	71.246	47.222	0	0	31.2	3.51	27.2461	Temperature too high;	AGGCGTGTAG	AGGCGTGTAG	AGGCGTGTAGGTAAAATCAAGTCCACCGCG	70.945	53.333	2.99	5.89	0	6.46	20.9446	Temperature too high; Contains too-long poly nucleotide tract;	0	0.89	0	48.1907
32	10nt ed5	0	ACCGTGAGTC	27	ACCGTGAGTC	ACCGTGAGTC	ACCGTGAGTCATGTCACCACAAACAGAGACTAAAGC	71.358	47.222	0	7.9	38.88	3.51	27.3583	Temperature too high;	ACCGTGAGTC	ACCGTGAGTC	ACCGTGAGTCGTAAAATCAAGTCCACCGCG	71.02	53.333	0	0	35.94	6.46	21.0203	Temperature too high; Contains too-long poly nucleotide tract;	0	0	0	48.3786
145	10nt ed5	0	TAGCGGCACT	27	TAGCGGCACT	TAGCGGCACT	TAGCGGCACTATGTCACCACAAACAGAGACTAAAGC	71.272	47.222	0	0	31.38	3.51	27.2715	Temperature too high;	TAGCGGCACT	TAGCGGCACT	TAGCGGCACTGTAAAATCAAGTCCACCGCG	71.296	53.333	0	9.83	33.29	6.46	21.296	Temperature too high; Contains too-long poly nucleotide tract;	7.12	9.12	0	48.5676
141	10nt ed5	0	TAAGAGCGCC	28	TAAGAGCGCC	TAAGAGCGCC	TAAGAGCGCCATGTCACCACAAACAGAGACTAAAGC	71.582	47.222	0	0	31.2	3.51	27.5822	Temperature too high;	TAAGAGCGCC	TAAGAGCGCC	TAAGAGCGCCGTAAAATCAAGTCCACCGCG	71.284	53.333	0	0	0	6.46	21.2835	Temperature too high; Contains too-long poly nucleotide tract;	0	0	0	48.8657
54	10nt ed5	0	AGGCACAGCT	28	AGGCACAGCT	AGGCACAGCT	AGGCACAGCTATGTCACCACAAACAGAGACTAAAGC	71.457	47.222	0.71	0.71	31.38	3.51	27.4566	Temperature too high;	AGGCACAGCT	AGGCACAGCT	AGGCACAGCTGTAAAATCAAGTCCACCGCG	71.515	53.333	0	9.88	0	6.46	21.5145	Temperature too high; Contains too-long poly nucleotide tract;	0	1.42	0	48.9711
40	10nt ed5	0	ACTGGCTTGG	27	ACTGGCTTGG	ACTGGCTTGG	ACTGGCTTGGATGTCACCACAAACAGAGACTAAAGC	71.611	47.222	4	11.82	36.2	3.51	27.6105	Temperature too high;	ACTGGCTTGG	ACTGGCTTGG	ACTGGCTTGGGTAAAATCAAGTCCACCGCG	71.374	53.333	0.95	5.78	37.84	6.46	21.3743	Temperature too high; Contains too-long poly nucleotide tract;	7.6	8.45	0	48.9849
38	10nt ed5	0	AAGGTGCCTG	28	AAGGTGCCTG	AAGGTGCCTG	AAGGTGCCTGATGTCACCACAAACAGAGACTAAAGC	71.611	47.222	0.36	6.01	35.97	3.51	27.6105	Temperature too high;	AAGGTGCCTG	AAGGTGCCTG	AAGGTGCCTGGTAAAATCAAGTCCACCGCG	71.374	53.333	0	0	0	6.46	21.3743	Temperature too high; Contains too-long poly nucleotide tract;	0	5.32	0	48.9849
62	10nt ed5	0	ATGAGGCCAC	28	ATGAGGCCAC	ATGAGGCCAC	ATGAGGCCACATGTCACCACAAACAGAGACTAAAGC	71.652	47.222	0	10.41	31.2	3.51	27.6523	Temperature too high;	ATGAGGCCAC	ATGAGGCCAC	ATGAGGCCACGTAAAATCAAGTCCACCGCG	71.362	53.333	0	0	0	6.46	21.3625	Temperature too high; Contains too-long poly nucleotide tract;	6.42	0	0	49.0148
37	10nt ed5	0	AAGGCCGTCA	28	AAGGCCGTCA	AAGGCCGTCA	AAGGCCGTCAATGTCACCACAAACAGAGACTAAAGC	71.893	47.222	0.66	2.27	31.2	3.51	27.8931	Temperature too high;	AAGGCCGTCA	AAGGCCGTCA	AAGGCCGTCAGTAAAATCAAGTCCACCGCG	71.313	53.333	0	0	0	6.46	21.3134	Temperature too high; Contains too-long poly nucleotide tract;	0	0	0	49.2065
162	10nt ed5	0	TGACGTCGCA	27	TGACGTCGCA	TGACGTCGCA	TGACGTCGCAATGTCACCACAAACAGAGACTAAAGC	71.931	47.222	0	8.69	39.2	3.51	27.9311	Temperature too high;	TGACGTCGCA	TGACGTCGCA	TGACGTCGCAGTAAAATCAAGTCCACCGCG	71.368	53.333	0	8.69	0	6.46	21.3676	Temperature too high; Contains too-long poly nucleotide tract;	0	8.69	0	49.2987
42	10nt ed5	0	ACTTCCGCAC	25	ACTTCCGCAC	ACTTCCGCAC	ACTTCCGCACATGTCACCACAAACAGAGACTAAAGC	71.851	47.222	0	0	31.2	3.51	27.851	Temperature too high;	ACTTCCGCAC	ACTTCCGCAC	ACTTCCGCACGTAAAATCAAGTCCACCGCG	71.599	53.333	0	0	0	6.46	21.5991	Temperature too high; Contains too-long poly nucleotide tract;	0	0	0	49.4501
155	10nt ed5	0	TTGGCGGTTC	26	TTGGCGGTTC	TTGGCGGTTC	TTGGCGGTTCATGTCACCACAAACAGAGACTAAAGC	72.029	47.222	2.38	10.68	31.2	3.51	28.0293	Temperature too high;	TTGGCGGTTC	TTGGCGGTTC	TTGGCGGTTCGTAAAATCAAGTCCACCGCG	71.808	53.333	0	6.89	35.33	6.46	21.8078	Temperature too high; Contains too-long poly nucleotide tract;	6.84	4.08	0	49.8371
2	10nt ed5	0	TTGTTGGCGG	27	TTGTTGGCGG	TTGTTGGCGG	TTGTTGGCGGATGTCACCACAAACAGAGACTAAAGC	72.029	47.222	0	2.41	31.2	3.51	28.0293	Temperature too high;	TTGTTGGCGG	TTGTTGGCGG	TTGTTGGCGGGTAAAATCAAGTCCACCGCG	71.873	53.333	0	3.39	0	6.46	21.8728	Temperature too high; Contains too-long poly nucleotide tract;	0.39	4.66	0	49.9021
91	10nt ed5	0	CGTAGTATAC	23	CGTAGTATAC	CGTAGTATAC	CGTAGTATACATGTCACCACAAACAGAGACTAAAGC	67.357	41.667	0	0	31.2	3.51	23.3567	Temperature too high;	CGTAGTATAC	CGTAGTATAC	CGTAGTATACGTAAAATCAAGTCCACCGCG	66.331	46.667	0	0	43.3	6.46	16.331	Temperature too high; Hairpin stability too high; Contains too-long poly nucleotide tract;	0	0	1	39.6878
142	10nt ed5	0	GTGAGATGAT	25	GTGAGATGAT	GTGAGATGAT	GTGAGATGATATGTCACCACAAACAGAGACTAAAGC	67.559	41.667	0	5.94	39.89	3.51	23.5593	Temperature too high;	GTGAGATGAT	GTGAGATGAT	GTGAGATGATGTAAAATCAAGTCCACCGCG	66.921	46.667	0	0	43.32	6.46	16.9205	Temperature too high; Hairpin stability too high; Contains too-long poly nucleotide tract;	0	0	1	40.4799
103	10nt ed5	0	CTACGTGATT	22	CTACGTGATT	CTACGTGATT	CTACGTGATTATGTCACCACAAACAGAGACTAAAGC	67.669	41.667	0	0	47.49	3.51	23.6693	Temperature too high; Hairpin stability too high;	CTACGTGATT	CTACGTGATT	CTACGTGATTGTAAAATCAAGTCCACCGCG	67.055	46.667	0	5.84	38.41	6.46	17.055	Temperature too high; Contains too-long poly nucleotide tract;	0	0	1	40.7243
108	10nt ed5	0	CTTATTGGTC	21	CTTATTGGTC	CTTATTGGTC	CTTATTGGTCATGTCACCACAAACAGAGACTAAAGC	68.005	41.667	0	1.3	41.22	3.51	24.005	Temperature too high; Hairpin stability too high;	CTTATTGGTC	CTTATTGGTC	CTTATTGGTCGTAAAATCAAGTCCACCGCG	67.084	46.667	0	0	0	6.46	17.0841	Temperature too high; Contains too-long poly nucleotide tract;	0	0	1	41.0891
69	10nt ed5	0	CAAGGACAAT	25	CAAGGACAAT	CAAGGACAAT	CAAGGACAATATGTCACCACAAACAGAGACTAAAGC	68.005	41.667	0	0	45.57	3.51	24.005	Temperature too high; Hairpin stability too high;	CAAGGACAAT	CAAGGACAAT	CAAGGACAATGTAAAATCAAGTCCACCGCG	67.445	46.667	0.91	13.78	38.9	6.46	17.4455	Temperature too high; Contains too-long poly nucleotide tract;	0	0.2	1	41.4505
7	10nt ed5	0	AACAGTCTCT	22	AACAGTCTCT	AACAGTCTCT	AACAGTCTCTATGTCACCACAAACAGAGACTAAAGC	68.34	41.667	3.5	16.84	45.83	3.51	24.3398	Temperature too high; Hairpin stability too high;	AACAGTCTCT	AACAGTCTCT	AACAGTCTCTGTAAAATCAAGTCCACCGCG	67.836	46.667	0	0	38.79	6.46	17.8362	Temperature too high; Contains too-long poly nucleotide tract;	2.15	0	1	42.1759
25	10nt ed5	0	ACAGAAGACT	25	ACAGAAGACT	ACAGAAGACT	ACAGAAGACTATGTCACCACAAACAGAGACTAAAGC	68.34	41.667	0	0	31.81	3.51	24.3398	Temperature too high;	ACAGAAGACT	ACAGAAGACT	ACAGAAGACTGTAAAATCAAGTCCACCGCG	67.836	46.667	0	0	48.21	6.46	17.8362	Temperature too high; Hairpin stability too high; Contains too-long poly nucleotide tract;	0	0	1	42.1759
8	10nt ed5	0	AACCAATAGG	25	AACCAATAGG	AACCAATAGG	AACCAATAGGATGTCACCACAAACAGAGACTAAAGC	68.747	41.667	0	0	31.02	3.51	24.7468	Temperature too high;	AACCAATAGG	AACCAATAGG	AACCAATAGGGTAAAATCAAGTCCACCGCG	67.972	46.667	0	0	49.11	6.46	17.9718	Temperature too high; Hairpin stability too high; Contains too-long poly nucleotide tract;	0	0	1	42.7186
33	10nt ed5	0	ACCTCTTGAA	22	ACCTCTTGAA	ACCTCTTGAA	ACCTCTTGAAATGTCACCACAAACAGAGACTAAAGC	68.99	41.667	0	3.33	31.2	3.51	24.9901	Temperature too high;	ACCTCTTGAA	ACCTCTTGAA	ACCTCTTGAAGTAAAATCAAGTCCACCGCG	67.869	46.667	0	0	44.51	6.46	17.8691	Temperature too high; Hairpin stability too high; Contains too-long poly nucleotide tract;	0	0	1	42.8593
147	10nt ed5	0	TAGTGATGCA	24	TAGTGATGCA	TAGTGATGCA	TAGTGATGCAATGTCACCACAAACAGAGACTAAAGC	69.028	41.667	0	4.16	41.27	3.51	25.0281	Temperature too high; Hairpin stability too high;	TAGTGATGCA	TAGTGATGCA	TAGTGATGCAGTAAAATCAAGTCCACCGCG	67.92	46.667	0	0	30	6.46	17.9204	Temperature too high; Contains too-long poly nucleotide tract;	0	0	1	42.9485
39	10nt ed5	0	AAGTCGTTGT	23	AAGTCGTTGT	AAGTCGTTGT	AAGTCGTTGTATGTCACCACAAACAGAGACTAAAGC	68.946	41.667	0	14.15	41.09	3.51	24.9456	Temperature too high; Hairpin stability too high;	AAGTCGTTGT	AAGTCGTTGT	AAGTCGTTGTGTAAAATCAAGTCCACCGCG	68.555	46.667	0	0	0	6.46	18.5554	Temperature too high; Contains too-long poly nucleotide tract;	0	0	1	43.5009
20	10nt ed5	0	ACAACATGGT	24	ACAACATGGT	ACAACATGGT	ACAACATGGTATGTCACCACAAACAGAGACTAAAGC	69.019	41.667	0	0	54.69	3.51	25.0188	Temperature too high; Hairpin stability too high;	ACAACATGGT	ACAACATGGT	ACAACATGGTGTAAAATCAAGTCCACCGCG	68.638	46.667	0	11.48	0	6.46	18.6379	Temperature too high; Contains too-long poly nucleotide tract;	0	4.31	1	43.6566
28	10nt ed5	0	ACCATTGTTG	22	ACCATTGTTG	ACCATTGTTG	ACCATTGTTGATGTCACCACAAACAGAGACTAAAGC	69.334	41.667	0	0	31.2	3.51	25.3338	Temperature too high;	ACCATTGTTG	ACCATTGTTG	ACCATTGTTGGTAAAATCAAGTCCACCGCG	68.674	46.667	0	0	49.4	6.46	18.6742	Temperature too high; Hairpin stability too high; Contains too-long poly nucleotide tract;	0	0	1	44.008
138	10nt ed5	0	GTTCATGACC	24	GTTCATGACC	GTTCATGACC	GTTCATGACCATGTCACCACAAACAGAGACTAAAGC	69.498	44.444	0	0	40.35	3.51	25.4979	Temperature too high; Hairpin stability too high;	GTTCATGACC	GTTCATGACC	GTTCATGACCGTAAAATCAAGTCCACCGCG	68.839	50	0	0	0	6.46	18.8389	Temperature too high; Contains too-long poly nucleotide tract;	0	0	1	44.3368
46	10nt ed5	0	AGAGGAAGTG	29	AGAGGAAGTG	AGAGGAAGTG	AGAGGAAGTGATGTCACCACAAACAGAGACTAAAGC	69.731	44.444	0	2.27	44.13	3.51	25.7312	Temperature too high; Hairpin stability too high;	AGAGGAAGTG	AGAGGAAGTG	AGAGGAAGTGGTAAAATCAAGTCCACCGCG	69.143	50	0	0	42.74	6.46	19.1431	Temperature too high; Hairpin stability too high; Contains too-long poly nucleotide tract;	2.02	10.6	1	44.8743
59	10nt ed5	0	ATATCCGTGG	25	ATATCCGTGG	ATATCCGTGG	ATATCCGTGGATGTCACCACAAACAGAGACTAAAGC	69.831	44.444	0	8.02	50.76	3.51	25.8315	Temperature too high; Hairpin stability too high;	ATATCCGTGG	ATATCCGTGG	ATATCCGTGGGTAAAATCAAGTCCACCGCG	69.264	50	0	0	0	6.46	19.2636	Temperature too high; Contains too-long poly nucleotide tract;	1.61	0	1	45.0951
161	10nt ed5	0	TCTCGACGTT	23	TCTCGACGTT	TCTCGACGTT	TCTCGACGTTATGTCACCACAAACAGAGACTAAAGC	69.816	44.444	0	8.49	44.77	3.51	25.8161	Temperature too high; Hairpin stability too high;	TCTCGACGTT	TCTCGACGTT	TCTCGACGTTGTAAAATCAAGTCCACCGCG	69.583	50	0	0	0	6.46	19.5825	Temperature too high; Contains too-long poly nucleotide tract;	0	0	1	45.3986
44	10nt ed5	0	AGAAGTGACC	27	AGAAGTGACC	AGAAGTGACC	AGAAGTGACCATGTCACCACAAACAGAGACTAAAGC	70.032	44.444	0	13.63	51.84	3.51	26.0322	Temperature too high; Hairpin stability too high;	AGAAGTGACC	AGAAGTGACC	AGAAGTGACCGTAAAATCAAGTCCACCGCG	69.459	50	0	0	0	6.46	19.4591	Temperature too high; Contains too-long poly nucleotide tract;	0	0	1	45.4912
135	10nt ed5	0	GGAAGACCTC	28	GGAAGACCTC	GGAAGACCTC	GGAAGACCTCATGTCACCACAAACAGAGACTAAAGC	70.227	47.222	0	1.27	43.35	3.51	26.2269	Temperature too high; Hairpin stability too high;	GGAAGACCTC	GGAAGACCTC	GGAAGACCTCGTAAAATCAAGTCCACCGCG	69.691	53.333	0	0	0	6.46	19.6909	Temperature too high; Contains too-long poly nucleotide tract;	0	0	1	45.9178
74	10nt ed5	0	CCGAGGTCTT	26	CCGAGGTCTT	CCGAGGTCTT	CCGAGGTCTTATGTCACCACAAACAGAGACTAAAGC	70.064	47.222	0	1.2	35.25	3.51	26.0635	Temperature too high;	CCGAGGTCTT	CCGAGGTCTT	CCGAGGTCTTGTAAAATCAAGTCCACCGCG	69.873	53.333	16.85	16.85	42.64	6.46	19.8727	Temperature too high; Hairpin stability too high; Contains too-long poly nucleotide tract;	0.41	0.11	1	45.9362
113	10nt ed5	0	GATGGAGACG	30	GATGGAGACG	GATGGAGACG	GATGGAGACGATGTCACCACAAACAGAGACTAAAGC	70.226	47.222	0	5	44.54	3.51	26.2262	Temperature too high; Hairpin stability too high;	GATGGAGACG	GATGGAGACG	GATGGAGACGGTAAAATCAAGTCCACCGCG	69.739	53.333	0	0	29.65	6.46	19.7394	Temperature too high; Contains too-long poly nucleotide tract;	2.08	0	1	45.9655
93	10nt ed5	0	CGTCTCGTGA	26	CGTCTCGTGA	CGTCTCGTGA	CGTCTCGTGAATGTCACCACAAACAGAGACTAAAGC	70.589	47.222	6.07	17.08	42.73	3.51	26.5887	Temperature too high; Hairpin stability too high;	CGTCTCGTGA	CGTCTCGTGA	CGTCTCGTGAGTAAAATCAAGTCCACCGCG	69.787	53.333	0	0	27.73	6.46	19.7867	Temperature too high; Contains too-long poly nucleotide tract;	3.9	0.79	1	46.3754
29	10nt ed5	0	ACCGACACAA	26	ACCGACACAA	ACCGACACAA	ACCGACACAAATGTCACCACAAACAGAGACTAAAGC	70.622	44.444	0	0	48.95	3.51	26.6223	Temperature too high; Hairpin stability too high;	ACCGACACAA	ACCGACACAA	ACCGACACAAGTAAAATCAAGTCCACCGCG	69.812	50	0	0	0	6.46	19.8124	Temperature too high; Contains too-long poly nucleotide tract;	0	0	1	46.4347
76	10nt ed5	0	CCGGTGGAAT	28	CCGGTGGAAT	CCGGTGGAAT	CCGGTGGAATATGTCACCACAAACAGAGACTAAAGC	70.438	47.222	0	16.98	32.97	3.51	26.4383	Temperature too high;	CCGGTGGAAT	CCGGTGGAAT	CCGGTGGAATGTAAAATCAAGTCCACCGCG	70.314	53.333	20.38	25.73	53.79	6.46	20.314	Temperature too high; Hairpin stability too high; Contains too-long poly nucleotide tract;	10.84	10.68	1	46.7523
88	10nt ed5	0	CGGTAACACC	27	CGGTAACACC	CGGTAACACC	CGGTAACACCATGTCACCACAAACAGAGACTAAAGC	70.656	47.222	0	0	36.31	3.51	26.6558	Temperature too high;	CGGTAACACC	CGGTAACACC	CGGTAACACCGTAAAATCAAGTCCACCGCG	70.199	53.333	0	5.97	52.16	6.46	20.1991	Temperature too high; Hairpin stability too high; Contains too-long poly nucleotide tract;	7.56	0	1	46.8549
71	10nt ed5	0	CCGAACAGTG	28	CCGAACAGTG	CCGAACAGTG	CCGAACAGTGATGTCACCACAAACAGAGACTAAAGC	70.633	47.222	0	0	44.13	3.51	26.6333	Temperature too high; Hairpin stability too high;	CCGAACAGTG	CCGAACAGTG	CCGAACAGTGGTAAAATCAAGTCCACCGCG	70.223	53.333	0.27	0.56	42.74	6.46	20.2228	Temperature too high; Hairpin stability too high; Contains too-long poly nucleotide tract;	4.37	2.77	1	46.8561
132	10nt ed5	0	GGTTGTGGCT	27	GGTTGTGGCT	GGTTGTGGCT	GGTTGTGGCTATGTCACCACAAACAGAGACTAAAGC	70.709	47.222	4.06	16.26	40.28	3.51	26.7086	Temperature too high; Hairpin stability too high;	GGTTGTGGCT	GGTTGTGGCT	GGTTGTGGCTGTAAAATCAAGTCCACCGCG	70.633	53.333	0	0.65	0	6.46	20.6327	Temperature too high; Contains too-long poly nucleotide tract;	5.81	9.63	1	47.3413
126	10nt ed5	0	GGCGGATTGA	29	GGCGGATTGA	GGCGGATTGA	GGCGGATTGAATGTCACCACAAACAGAGACTAAAGC	71.051	47.222	0	0	31.2	3.51	27.0514	Temperature too high;	GGCGGATTGA	GGCGGATTGA	GGCGGATTGAGTAAAATCAAGTCCACCGCG	70.324	53.333	8.45	20.12	42.61	6.46	20.3239	Temperature too high; Hairpin stability too high; Contains too-long poly nucleotide tract;	2.66	9	1	47.3753
148	10nt ed5	0	TACGAGGTGG	29	TACGAGGTGG	TACGAGGTGG	TACGAGGTGGATGTCACCACAAACAGAGACTAAAGC	70.928	47.222	0	10.25	57.51	3.51	26.928	Temperature too high; Hairpin stability too high;	TACGAGGTGG	TACGAGGTGG	TACGAGGTGGGTAAAATCAAGTCCACCGCG	70.566	53.333	30.88	30.88	46.74	6.46	20.566	Temperature too high; Hairpin stability too high; Contains too-long poly nucleotide tract;	14.7	21.1	1	47.494
85	10nt ed5	0	CGCTTGGACA	27	CGCTTGGACA	CGCTTGGACA	CGCTTGGACAATGTCACCACAAACAGAGACTAAAGC	71.124	47.222	4.25	4.25	31.2	3.51	27.1238	Temperature too high;	CGCTTGGACA	CGCTTGGACA	CGCTTGGACAGTAAAATCAAGTCCACCGCG	70.413	53.333	17.9	17.9	40.54	6.46	20.4131	Temperature too high; Hairpin stability too high; Contains too-long poly nucleotide tract;	9.64	12.49	1	47.5368
60	10nt ed5	0	ATCCTAGGCG	27	ATCCTAGGCG	ATCCTAGGCG	ATCCTAGGCGATGTCACCACAAACAGAGACTAAAGC	71.031	47.222	0	0	31.2	3.51	27.0308	Temperature too high;	ATCCTAGGCG	ATCCTAGGCG	ATCCTAGGCGGTAAAATCAAGTCCACCGCG	70.687	53.333	3.03	11.3	42.18	6.46	20.687	Temperature too high; Hairpin stability too high; Contains too-long poly nucleotide tract;	0	0	1	47.7177
11	10nt ed5	0	AACCTCCGGT	26	AACCTCCGGT	AACCTCCGGT	AACCTCCGGTATGTCACCACAAACAGAGACTAAAGC	71.126	47.222	0	3.14	45.02	3.51	27.126	Temperature too high; Hairpin stability too high;	AACCTCCGGT	AACCTCCGGT	AACCTCCGGTGTAAAATCAAGTCCACCGCG	71.124	53.333	0.71	4.34	32.62	6.46	21.1245	Temperature too high; Contains too-long poly nucleotide tract;	1.93	0	1	48.2505
131	10nt ed5	0	GGTGCAGCAA	29	GGTGCAGCAA	GGTGCAGCAA	GGTGCAGCAAATGTCACCACAAACAGAGACTAAAGC	71.472	47.222	0	9.4	42.36	3.51	27.4718	Temperature too high; Hairpin stability too high;	GGTGCAGCAA	GGTGCAGCAA	GGTGCAGCAAGTAAAATCAAGTCCACCGCG	70.822	53.333	0	8.76	0	6.46	20.8218	Temperature too high; Contains too-long poly nucleotide tract;	0	8.76	1	48.2936
31	10nt ed5	0	ACCGGTAACG	28	ACCGGTAACG	ACCGGTAACG	ACCGGTAACGATGTCACCACAAACAGAGACTAAAGC	71.371	47.222	0	2.24	71.22	3.51	27.3715	Temperature too high; Hairpin stability too high;	ACCGGTAACG	ACCGGTAACG	ACCGGTAACGGTAAAATCAAGTCCACCGCG	71.094	53.333	2.2	20.85	81.49	6.46	21.0942	Temperature too high; Hairpin stability too high; Contains too-long poly nucleotide tract;	10.6	10.48	1	48.4656
164	10nt ed5	0	TTCGGAGCAC	27	TTCGGAGCAC	TTCGGAGCAC	TTCGGAGCACATGTCACCACAAACAGAGACTAAAGC	71.694	47.222	0	6.79	31.2	3.51	27.6939	Temperature too high;	TTCGGAGCAC	TTCGGAGCAC	TTCGGAGCACGTAAAATCAAGTCCACCGCG	71.415	53.333	0	0	42.75	6.46	21.4148	Temperature too high; Hairpin stability too high; Contains too-long poly nucleotide tract;	0	0	1	49.1087
47	10nt ed5	0	ACGCAACTCG	27	ACGCAACTCG	ACGCAACTCG	ACGCAACTCGATGTCACCACAAACAGAGACTAAAGC	71.796	47.222	0	2.2	39.23	3.51	27.7963	Temperature too high;	ACGCAACTCG	ACGCAACTCG	ACGCAACTCGGTAAAATCAAGTCCACCGCG	71.599	53.333	0	0	41.69	6.46	21.5991	Temperature too high; Hairpin stability too high; Contains too-long poly nucleotide tract;	0	0	1	49.3954
64	10nt ed5	0	ATTGACCGCG	27	ATTGACCGCG	ATTGACCGCG	ATTGACCGCGATGTCACCACAAACAGAGACTAAAGC	71.879	47.222	0	12.18	39.72	3.51	27.879	Temperature too high;	ATTGACCGCG	ATTGACCGCG	ATTGACCGCGGTAAAATCAAGTCCACCGCG	71.696	53.333	32.72	32.72	51.03	6.46	21.6961	Temperature too high; Hairpin stability too high; Contains too-long poly nucleotide tract;	0	17.1	1	49.5752

## Sheet: original-id-map-to-idt-id
re-id	original id	tags	unmodified	tag	cycles	left_tag_common		left_sequence		right_sequence
1	3	10nt ed5	0	AACAACAACC	24	AACAACAACC	rbcLa-1-upper	AACAACAACCATGTCACCACAAACAGAGACTAAAG*C	rbcLa-1-lower	AACAACAACCGTAAAATCAAGTCCACCRC*G		36	30
2	4	10nt ed5	0	AACAAGCCGA	27	AACAAGCCGA	rbcLa-2-upper	AACAAGCCGAATGTCACCACAAACAGAGACTAAAG*C	rbcLa-2-lower	AACAAGCCGAGTAAAATCAAGTCCACCRC*G		yields 30 nm synthesis @ 100 uM	yields 30 nm synthesis @ 100 uM
3	6	10nt ed5	0	AACACGGAAT	25	AACACGGAAT	rbcLa-3-upper	AACACGGAATATGTCACCACAAACAGAGACTAAAG*C	rbcLa-3-lower	AACACGGAATGTAAAATCAAGTCCACCRC*G
4	9	10nt ed5	0	AACCATGCAC	25	AACCATGCAC	rbcLa-4-upper	AACCATGCACATGTCACCACAAACAGAGACTAAAG*C	rbcLa-4-lower	AACCATGCACGTAAAATCAAGTCCACCRC*G
5	10	10nt ed5	0	AACCGAGTTA	24	AACCGAGTTA	rbcLa-5-upper	AACCGAGTTAATGTCACCACAAACAGAGACTAAAG*C	rbcLa-5-lower	AACCGAGTTAGTAAAATCAAGTCCACCRC*G
6	35	10nt ed5	0	AAGATCTGAG	25	AAGATCTGAG	rbcLa-6-upper	AAGATCTGAGATGTCACCACAAACAGAGACTAAAG*C	rbcLa-6-lower	AAGATCTGAGGTAAAATCAAGTCCACCRC*G
7	36	10nt ed5	0	AAGCTTATCC	22	AAGCTTATCC	rbcLa-7-upper	AAGCTTATCCATGTCACCACAAACAGAGACTAAAG*C	rbcLa-7-lower	AAGCTTATCCGTAAAATCAAGTCCACCRC*G
8	37	10nt ed5	0	AAGGCCGTCA	28	AAGGCCGTCA	rbcLa-8-upper	AAGGCCGTCAATGTCACCACAAACAGAGACTAAAG*C	rbcLa-8-lower	AAGGCCGTCAGTAAAATCAAGTCCACCRC*G
9	38	10nt ed5	0	AAGGTGCCTG	28	AAGGTGCCTG	rbcLa-9-upper	AAGGTGCCTGATGTCACCACAAACAGAGACTAAAG*C	rbcLa-9-lower	AAGGTGCCTGGTAAAATCAAGTCCACCRC*G
10	12	10nt ed5	0	AATACCAGGA	25	AATACCAGGA	rbcLa-10-upper	AATACCAGGAATGTCACCACAAACAGAGACTAAAG*C	rbcLa-10-lower	AATACCAGGAGTAAAATCAAGTCCACCRC*G
11	13	10nt ed5	0	AATACTTCCG	22	AATACTTCCG	rbcLa-11-upper	AATACTTCCGATGTCACCACAAACAGAGACTAAAG*C	rbcLa-11-lower	AATACTTCCGGTAAAATCAAGTCCACCRC*G
12	14	10nt ed5	0	AATAGGTAGC	25	AATAGGTAGC	rbcLa-12-upper	AATAGGTAGCATGTCACCACAAACAGAGACTAAAG*C	rbcLa-12-lower	AATAGGTAGCGTAAAATCAAGTCCACCRC*G
13	15	10nt ed5	0	AATCGAACCT	23	AATCGAACCT	rbcLa-13-upper	AATCGAACCTATGTCACCACAAACAGAGACTAAAG*C	rbcLa-13-lower	AATCGAACCTGTAAAATCAAGTCCACCRC*G
14	16	10nt ed5	0	AATCGGCGAA	27	AATCGGCGAA	rbcLa-14-upper	AATCGGCGAAATGTCACCACAAACAGAGACTAAAG*C	rbcLa-14-lower	AATCGGCGAAGTAAAATCAAGTCCACCRC*G
15	17	10nt ed5	0	AATGCACTAC	23	AATGCACTAC	rbcLa-15-upper	AATGCACTACATGTCACCACAAACAGAGACTAAAG*C	rbcLa-15-lower	AATGCACTACGTAAAATCAAGTCCACCRC*G
16	18	10nt ed5	0	AATGCTGGTT	23	AATGCTGGTT	rbcLa-16-upper	AATGCTGGTTATGTCACCACAAACAGAGACTAAAG*C	rbcLa-16-lower	AATGCTGGTTGTAAAATCAAGTCCACCRC*G
17	19	10nt ed5	0	AATTAAGGCC	24	AATTAAGGCC	rbcLa-17-upper	AATTAAGGCCATGTCACCACAAACAGAGACTAAAG*C	rbcLa-17-lower	AATTAAGGCCGTAAAATCAAGTCCACCRC*G
18	21	10nt ed5	0	ACAACGCTTC	24	ACAACGCTTC	rbcLa-18-upper	ACAACGCTTCATGTCACCACAAACAGAGACTAAAG*C	rbcLa-18-lower	ACAACGCTTCGTAAAATCAAGTCCACCRC*G
19	22	10nt ed5	0	ACAAGAGCAG	28	ACAAGAGCAG	rbcLa-19-upper	ACAAGAGCAGATGTCACCACAAACAGAGACTAAAG*C	rbcLa-19-lower	ACAAGAGCAGGTAAAATCAAGTCCACCRC*G
20	23	10nt ed5	0	ACACGTATGA	24	ACACGTATGA	rbcLa-20-upper	ACACGTATGAATGTCACCACAAACAGAGACTAAAG*C	rbcLa-20-lower	ACACGTATGAGTAAAATCAAGTCCACCRC*G
21	24	10nt ed5	0	ACACTCCAAG	25	ACACTCCAAG	rbcLa-21-upper	ACACTCCAAGATGTCACCACAAACAGAGACTAAAG*C	rbcLa-21-lower	ACACTCCAAGGTAAAATCAAGTCCACCRC*G
22	26	10nt ed5	0	ACAGATTCGC	25	ACAGATTCGC	rbcLa-22-upper	ACAGATTCGCATGTCACCACAAACAGAGACTAAAG*C	rbcLa-22-lower	ACAGATTCGCGTAAAATCAAGTCCACCRC*G
23	27	10nt ed5	0	ACATGGTCCA	25	ACATGGTCCA	rbcLa-23-upper	ACATGGTCCAATGTCACCACAAACAGAGACTAAAG*C	rbcLa-23-lower	ACATGGTCCAGTAAAATCAAGTCCACCRC*G
24	30	10nt ed5	0	ACCGCCTATT	23	ACCGCCTATT	rbcLa-24-upper	ACCGCCTATTATGTCACCACAAACAGAGACTAAAG*C	rbcLa-24-lower	ACCGCCTATTGTAAAATCAAGTCCACCRC*G
25	32	10nt ed5	0	ACCGTGAGTC	27	ACCGTGAGTC	rbcLa-25-upper	ACCGTGAGTCATGTCACCACAAACAGAGACTAAAG*C	rbcLa-25-lower	ACCGTGAGTCGTAAAATCAAGTCCACCRC*G
26	34	10nt ed5	0	ACCTTACCTT	20	ACCTTACCTT	rbcLa-26-upper	ACCTTACCTTATGTCACCACAAACAGAGACTAAAG*C	rbcLa-26-lower	ACCTTACCTTGTAAAATCAAGTCCACCRC*G
27	48	10nt ed5	0	ACGGTTCTAA	23	ACGGTTCTAA	rbcLa-27-upper	ACGGTTCTAAATGTCACCACAAACAGAGACTAAAG*C	rbcLa-27-lower	ACGGTTCTAAGTAAAATCAAGTCCACCRC*G
28	49	10nt ed5	0	ACGTAGCGAT	26	ACGTAGCGAT	rbcLa-28-upper	ACGTAGCGATATGTCACCACAAACAGAGACTAAAG*C	rbcLa-28-lower	ACGTAGCGATGTAAAATCAAGTCCACCRC*G
29	40	10nt ed5	0	ACTGGCTTGG	27	ACTGGCTTGG	rbcLa-29-upper	ACTGGCTTGGATGTCACCACAAACAGAGACTAAAG*C	rbcLa-29-lower	ACTGGCTTGGGTAAAATCAAGTCCACCRC*G
30	41	10nt ed5	0	ACTTAGAAGG	25	ACTTAGAAGG	rbcLa-30-upper	ACTTAGAAGGATGTCACCACAAACAGAGACTAAAG*C	rbcLa-30-lower	ACTTAGAAGGGTAAAATCAAGTCCACCRC*G
31	42	10nt ed5	0	ACTTCCGCAC	25	ACTTCCGCAC	rbcLa-31-upper	ACTTCCGCACATGTCACCACAAACAGAGACTAAAG*C	rbcLa-31-lower	ACTTCCGCACGTAAAATCAAGTCCACCRC*G
32	43	10nt ed5	0	AGAACCACAT	24	AGAACCACAT	rbcLa-32-upper	AGAACCACATATGTCACCACAAACAGAGACTAAAG*C	rbcLa-32-lower	AGAACCACATGTAAAATCAAGTCCACCRC*G
33	45	10nt ed5	0	AGAATCGGTA	25	AGAATCGGTA	rbcLa-33-upper	AGAATCGGTAATGTCACCACAAACAGAGACTAAAG*C	rbcLa-33-lower	AGAATCGGTAGTAAAATCAAGTCCACCRC*G
34	50	10nt ed5	0	AGCTACTGTC	24	AGCTACTGTC	rbcLa-34-upper	AGCTACTGTCATGTCACCACAAACAGAGACTAAAG*C	rbcLa-34-lower	AGCTACTGTCGTAAAATCAAGTCCACCRC*G
35	51	10nt ed5	0	AGCTCAACGA	26	AGCTCAACGA	rbcLa-35-upper	AGCTCAACGAATGTCACCACAAACAGAGACTAAAG*C	rbcLa-35-lower	AGCTCAACGAGTAAAATCAAGTCCACCRC*G
36	52	10nt ed5	0	AGCTGTCATA	23	AGCTGTCATA	rbcLa-36-upper	AGCTGTCATAATGTCACCACAAACAGAGACTAAAG*C	rbcLa-36-lower	AGCTGTCATAGTAAAATCAAGTCCACCRC*G
37	53	10nt ed5	0	AGGAGAATCA	26	AGGAGAATCA	rbcLa-37-upper	AGGAGAATCAATGTCACCACAAACAGAGACTAAAG*C	rbcLa-37-lower	AGGAGAATCAGTAAAATCAAGTCCACCRC*G
38	54	10nt ed5	0	AGGCACAGCT	28	AGGCACAGCT	rbcLa-38-upper	AGGCACAGCTATGTCACCACAAACAGAGACTAAAG*C	rbcLa-38-lower	AGGCACAGCTGTAAAATCAAGTCCACCRC*G
39	55	10nt ed5	0	AGGCGTGTAG	29	AGGCGTGTAG	rbcLa-39-upper	AGGCGTGTAGATGTCACCACAAACAGAGACTAAAG*C	rbcLa-39-lower	AGGCGTGTAGGTAAAATCAAGTCCACCRC*G
40	56	10nt ed5	0	AGTATAGCGC	26	AGTATAGCGC	rbcLa-40-upper	AGTATAGCGCATGTCACCACAAACAGAGACTAAAG*C	rbcLa-40-lower	AGTATAGCGCGTAAAATCAAGTCCACCRC*G
41	57	10nt ed5	0	AGTCCGACTG	27	AGTCCGACTG	rbcLa-41-upper	AGTCCGACTGATGTCACCACAAACAGAGACTAAAG*C	rbcLa-41-lower	AGTCCGACTGGTAAAATCAAGTCCACCRC*G
42	58	10nt ed5	0	AGTCCTTAAC	22	AGTCCTTAAC	rbcLa-42-upper	AGTCCTTAACATGTCACCACAAACAGAGACTAAAG*C	rbcLa-42-lower	AGTCCTTAACGTAAAATCAAGTCCACCRC*G
43	61	10nt ed5	0	ATCTCGATAC	22	ATCTCGATAC	rbcLa-43-upper	ATCTCGATACATGTCACCACAAACAGAGACTAAAG*C	rbcLa-43-lower	ATCTCGATACGTAAAATCAAGTCCACCRC*G
44	62	10nt ed5	0	ATGAGGCCAC	28	ATGAGGCCAC	rbcLa-44-upper	ATGAGGCCACATGTCACCACAAACAGAGACTAAAG*C	rbcLa-44-lower	ATGAGGCCACGTAAAATCAAGTCCACCRC*G
45	63	10nt ed5	0	ATGGAAGGAA	27	ATGGAAGGAA	rbcLa-45-upper	ATGGAAGGAAATGTCACCACAAACAGAGACTAAAG*C	rbcLa-45-lower	ATGGAAGGAAGTAAAATCAAGTCCACCRC*G
46	65	10nt ed5	0	ATTGTGTTCC	21	ATTGTGTTCC	rbcLa-46-upper	ATTGTGTTCCATGTCACCACAAACAGAGACTAAAG*C	rbcLa-46-lower	ATTGTGTTCCGTAAAATCAAGTCCACCRC*G
47	66	10nt ed5	0	CAACCTAACA	23	CAACCTAACA	rbcLa-47-upper	CAACCTAACAATGTCACCACAAACAGAGACTAAAG*C	rbcLa-47-lower	CAACCTAACAGTAAAATCAAGTCCACCRC*G
48	67	10nt ed5	0	CAACTGGAGG	29	CAACTGGAGG	rbcLa-48-upper	CAACTGGAGGATGTCACCACAAACAGAGACTAAAG*C	rbcLa-48-lower	CAACTGGAGGGTAAAATCAAGTCCACCRC*G
49	68	10nt ed5	0	CAAGAAGTTC	24	CAAGAAGTTC	rbcLa-49-upper	CAAGAAGTTCATGTCACCACAAACAGAGACTAAAG*C	rbcLa-49-lower	CAAGAAGTTCGTAAAATCAAGTCCACCRC*G
50	70	10nt ed5	0	CAAGGTTGGA	27	CAAGGTTGGA	rbcLa-50-upper	CAAGGTTGGAATGTCACCACAAACAGAGACTAAAG*C	rbcLa-50-lower	CAAGGTTGGAGTAAAATCAAGTCCACCRC*G
51	96	10nt ed5	0	CACTCTGCCT	24	CACTCTGCCT	rbcLa-51-upper	CACTCTGCCTATGTCACCACAAACAGAGACTAAAG*C	rbcLa-51-lower	CACTCTGCCTGTAAAATCAAGTCCACCRC*G
52	77	10nt ed5	0	CATTCCTCTA	20	CATTCCTCTA	rbcLa-52-upper	CATTCCTCTAATGTCACCACAAACAGAGACTAAAG*C	rbcLa-52-lower	CATTCCTCTAGTAAAATCAAGTCCACCRC*G
53	78	10nt ed5	0	CATTGAGTGT	23	CATTGAGTGT	rbcLa-53-upper	CATTGAGTGTATGTCACCACAAACAGAGACTAAAG*C	rbcLa-53-lower	CATTGAGTGTGTAAAATCAAGTCCACCRC*G
54	79	10nt ed5	0	CCACAATCAT	22	CCACAATCAT	rbcLa-54-upper	CCACAATCATATGTCACCACAAACAGAGACTAAAG*C	rbcLa-54-lower	CCACAATCATGTAAAATCAAGTCCACCRC*G
55	80	10nt ed5	0	CCACCTTGTC	24	CCACCTTGTC	rbcLa-55-upper	CCACCTTGTCATGTCACCACAAACAGAGACTAAAG*C	rbcLa-55-lower	CCACCTTGTCGTAAAATCAAGTCCACCRC*G
56	81	10nt ed5	0	CCAGCACCTA	26	CCAGCACCTA	rbcLa-56-upper	CCAGCACCTAATGTCACCACAAACAGAGACTAAAG*C	rbcLa-56-lower	CCAGCACCTAGTAAAATCAAGTCCACCRC*G
57	82	10nt ed5	0	CCATATGAAC	23	CCATATGAAC	rbcLa-57-upper	CCATATGAACATGTCACCACAAACAGAGACTAAAG*C	rbcLa-57-lower	CCATATGAACGTAAAATCAAGTCCACCRC*G
58	83	10nt ed5	0	CCATCGCAGT	26	CCATCGCAGT	rbcLa-58-upper	CCATCGCAGTATGTCACCACAAACAGAGACTAAAG*C	rbcLa-58-lower	CCATCGCAGTGTAAAATCAAGTCCACCRC*G
59	72	10nt ed5	0	CCGAATGCCA	27	CCGAATGCCA	rbcLa-59-upper	CCGAATGCCAATGTCACCACAAACAGAGACTAAAG*C	rbcLa-59-lower	CCGAATGCCAGTAAAATCAAGTCCACCRC*G
60	73	10nt ed5	0	CCGACTAAGC	27	CCGACTAAGC	rbcLa-60-upper	CCGACTAAGCATGTCACCACAAACAGAGACTAAAG*C	rbcLa-60-lower	CCGACTAAGCGTAAAATCAAGTCCACCRC*G
61	75	10nt ed5	0	CCGCCGTTAA	26	CCGCCGTTAA	rbcLa-61-upper	CCGCCGTTAAATGTCACCACAAACAGAGACTAAAG*C	rbcLa-61-lower	CCGCCGTTAAGTAAAATCAAGTCCACCRC*G
62	97	10nt ed5	0	CCGTTCTTCC	23	CCGTTCTTCC	rbcLa-62-upper	CCGTTCTTCCATGTCACCACAAACAGAGACTAAAG*C	rbcLa-62-lower	CCGTTCTTCCGTAAAATCAAGTCCACCRC*G
63	98	10nt ed5	0	CCTGTTAGCT	23	CCTGTTAGCT	rbcLa-63-upper	CCTGTTAGCTATGTCACCACAAACAGAGACTAAAG*C	rbcLa-63-lower	CCTGTTAGCTGTAAAATCAAGTCCACCRC*G
64	99	10nt ed5	0	CCTTGTCGAG	26	CCTTGTCGAG	rbcLa-64-upper	CCTTGTCGAGATGTCACCACAAACAGAGACTAAAG*C	rbcLa-64-lower	CCTTGTCGAGGTAAAATCAAGTCCACCRC*G
65	94	10nt ed5	0	CGATAGGCTG	28	CGATAGGCTG	rbcLa-65-upper	CGATAGGCTGATGTCACCACAAACAGAGACTAAAG*C	rbcLa-65-lower	CGATAGGCTGGTAAAATCAAGTCCACCRC*G
66	95	10nt ed5	0	CGCCAGCATT	26	CGCCAGCATT	rbcLa-66-upper	CGCCAGCATTATGTCACCACAAACAGAGACTAAAG*C	rbcLa-66-lower	CGCCAGCATTGTAAAATCAAGTCCACCRC*G
67	84	10nt ed5	0	CGCTTAATTG	22	CGCTTAATTG	rbcLa-67-upper	CGCTTAATTGATGTCACCACAAACAGAGACTAAAG*C	rbcLa-67-lower	CGCTTAATTGGTAAAATCAAGTCCACCRC*G
68	86	10nt ed5	0	CGGAACTTAT	23	CGGAACTTAT	rbcLa-68-upper	CGGAACTTATATGTCACCACAAACAGAGACTAAAG*C	rbcLa-68-lower	CGGAACTTATGTAAAATCAAGTCCACCRC*G
69	87	10nt ed5	0	CGGATGAGGA	30	CGGATGAGGA	rbcLa-69-upper	CGGATGAGGAATGTCACCACAAACAGAGACTAAAG*C	rbcLa-69-lower	CGGATGAGGAGTAAAATCAAGTCCACCRC*G
70	89	10nt ed5	0	CGGTCATGTT	24	CGGTCATGTT	rbcLa-70-upper	CGGTCATGTTATGTCACCACAAACAGAGACTAAAG*C	rbcLa-70-lower	CGGTCATGTTGTAAAATCAAGTCCACCRC*G
71	90	10nt ed5	0	CGTAATCCGG	27	CGTAATCCGG	rbcLa-71-upper	CGTAATCCGGATGTCACCACAAACAGAGACTAAAG*C	rbcLa-71-lower	CGTAATCCGGGTAAAATCAAGTCCACCRC*G
72	92	10nt ed5	0	CGTCAAGAAG	27	CGTCAAGAAG	rbcLa-72-upper	CGTCAAGAAGATGTCACCACAAACAGAGACTAAAG*C	rbcLa-72-lower	CGTCAAGAAGGTAAAATCAAGTCCACCRC*G
73	100	10nt ed5	0	CGTGCCAATC	26	CGTGCCAATC	rbcLa-73-upper	CGTGCCAATCATGTCACCACAAACAGAGACTAAAG*C	rbcLa-73-lower	CGTGCCAATCGTAAAATCAAGTCCACCRC*G
74	101	10nt ed5	0	CTAACGATCG	25	CTAACGATCG	rbcLa-74-upper	CTAACGATCGATGTCACCACAAACAGAGACTAAAG*C	rbcLa-74-lower	CTAACGATCGGTAAAATCAAGTCCACCRC*G
75	102	10nt ed5	0	CTACAACGGC	27	CTACAACGGC	rbcLa-75-upper	CTACAACGGCATGTCACCACAAACAGAGACTAAAG*C	rbcLa-75-lower	CTACAACGGCGTAAAATCAAGTCCACCRC*G
76	104	10nt ed5	0	CTATGCTAAG	23	CTATGCTAAG	rbcLa-76-upper	CTATGCTAAGATGTCACCACAAACAGAGACTAAAG*C	rbcLa-76-lower	CTATGCTAAGGTAAAATCAAGTCCACCRC*G
77	105	10nt ed5	0	CTGGACTCTC	25	CTGGACTCTC	rbcLa-77-upper	CTGGACTCTCATGTCACCACAAACAGAGACTAAAG*C	rbcLa-77-lower	CTGGACTCTCGTAAAATCAAGTCCACCRC*G
78	106	10nt ed5	0	CTGGTTCCGT	25	CTGGTTCCGT	rbcLa-78-upper	CTGGTTCCGTATGTCACCACAAACAGAGACTAAAG*C	rbcLa-78-lower	CTGGTTCCGTGTAAAATCAAGTCCACCRC*G
79	107	10nt ed5	0	CTTAGCTGCA	24	CTTAGCTGCA	rbcLa-79-upper	CTTAGCTGCAATGTCACCACAAACAGAGACTAAAG*C	rbcLa-79-lower	CTTAGCTGCAGTAAAATCAAGTCCACCRC*G
80	109	10nt ed5	0	CTTCCATAGT	21	CTTCCATAGT	rbcLa-80-upper	CTTCCATAGTATGTCACCACAAACAGAGACTAAAG*C	rbcLa-80-lower	CTTCCATAGTGTAAAATCAAGTCCACCRC*G
81	110	10nt ed5	0	CTTCTACCAA	21	CTTCTACCAA	rbcLa-81-upper	CTTCTACCAAATGTCACCACAAACAGAGACTAAAG*C	rbcLa-81-lower	CTTCTACCAAGTAAAATCAAGTCCACCRC*G
82	117	10nt ed5	0	GAACTCTCGC	26	GAACTCTCGC	rbcLa-82-upper	GAACTCTCGCATGTCACCACAAACAGAGACTAAAG*C	rbcLa-82-lower	GAACTCTCGCGTAAAATCAAGTCCACCRC*G
83	118	10nt ed5	0	GACCTATTCT	21	GACCTATTCT	rbcLa-83-upper	GACCTATTCTATGTCACCACAAACAGAGACTAAAG*C	rbcLa-83-lower	GACCTATTCTGTAAAATCAAGTCCACCRC*G
84	121	10nt ed5	0	GAGAGTACTA	25	GAGAGTACTA	rbcLa-84-upper	GAGAGTACTAATGTCACCACAAACAGAGACTAAAG*C	rbcLa-84-lower	GAGAGTACTAGTAAAATCAAGTCCACCRC*G
85	122	10nt ed5	0	GAGGAATAAC	26	GAGGAATAAC	rbcLa-85-upper	GAGGAATAACATGTCACCACAAACAGAGACTAAAG*C	rbcLa-85-lower	GAGGAATAACGTAAAATCAAGTCCACCRC*G
86	123	10nt ed5	0	GAGTTGGATC	26	GAGTTGGATC	rbcLa-86-upper	GAGTTGGATCATGTCACCACAAACAGAGACTAAAG*C	rbcLa-86-lower	GAGTTGGATCGTAAAATCAAGTCCACCRC*G
87	111	10nt ed5	0	GATCACATCA	23	GATCACATCA	rbcLa-87-upper	GATCACATCAATGTCACCACAAACAGAGACTAAAG*C	rbcLa-87-lower	GATCACATCAGTAAAATCAAGTCCACCRC*G
88	112	10nt ed5	0	GATGATCAGT	24	GATGATCAGT	rbcLa-88-upper	GATGATCAGTATGTCACCACAAACAGAGACTAAAG*C	rbcLa-88-lower	GATGATCAGTGTAAAATCAAGTCCACCRC*G
89	114	10nt ed5	0	GATTCGCCAG	27	GATTCGCCAG	rbcLa-89-upper	GATTCGCCAGATGTCACCACAAACAGAGACTAAAG*C	rbcLa-89-lower	GATTCGCCAGGTAAAATCAAGTCCACCRC*G
90	115	10nt ed5	0	GCAATTACCG	25	GCAATTACCG	rbcLa-90-upper	GCAATTACCGATGTCACCACAAACAGAGACTAAAG*C	rbcLa-90-lower	GCAATTACCGGTAAAATCAAGTCCACCRC*G
91	116	10nt ed5	0	GCACTAGATA	24	GCACTAGATA	rbcLa-91-upper	GCACTAGATAATGTCACCACAAACAGAGACTAAAG*C	rbcLa-91-lower	GCACTAGATAGTAAAATCAAGTCCACCRC*G
92	119	10nt ed5	0	GCAGGCGTAT	28	GCAGGCGTAT	rbcLa-92-upper	GCAGGCGTATATGTCACCACAAACAGAGACTAAAG*C	rbcLa-92-lower	GCAGGCGTATGTAAAATCAAGTCCACCRC*G
93	120	10nt ed5	0	GCCTTCAGGA	27	GCCTTCAGGA	rbcLa-93-upper	GCCTTCAGGAATGTCACCACAAACAGAGACTAAAG*C	rbcLa-93-lower	GCCTTCAGGAGTAAAATCAAGTCCACCRC*G
94	128	10nt ed5	0	GCTAAGTCAC	25	GCTAAGTCAC	rbcLa-94-upper	GCTAAGTCACATGTCACCACAAACAGAGACTAAAG*C	rbcLa-94-lower	GCTAAGTCACGTAAAATCAAGTCCACCRC*G
95	129	10nt ed5	0	GCTCCTCTTG	24	GCTCCTCTTG	rbcLa-95-upper	GCTCCTCTTGATGTCACCACAAACAGAGACTAAAG*C	rbcLa-95-lower	GCTCCTCTTGGTAAAATCAAGTCCACCRC*G
96	136	10nt ed5	0	GGAGCTATGG	29	GGAGCTATGG		GGAGCTATGGATGTCACCACAAACAGAGACTAAAG*C		GGAGCTATGGGTAAAATCAAGTCCACCRC*G
97	137	10nt ed5	0	GGATACAAGC	27	GGATACAAGC		GGATACAAGCATGTCACCACAAACAGAGACTAAAG*C		GGATACAAGCGTAAAATCAAGTCCACCRC*G
98	124	10nt ed5	0	GGCATCCTAA	25	GGCATCCTAA		GGCATCCTAAATGTCACCACAAACAGAGACTAAAG*C		GGCATCCTAAGTAAAATCAAGTCCACCRC*G
99	125	10nt ed5	0	GGCGAAGGTT	29	GGCGAAGGTT		GGCGAAGGTTATGTCACCACAAACAGAGACTAAAG*C		GGCGAAGGTTGTAAAATCAAGTCCACCRC*G
100	127	10nt ed5	0	GGCGTTACAT	25	GGCGTTACAT		GGCGTTACATATGTCACCACAAACAGAGACTAAAG*C		GGCGTTACATGTAAAATCAAGTCCACCRC*G
101	130	10nt ed5	0	GGTACGCTCT	26	GGTACGCTCT		GGTACGCTCTATGTCACCACAAACAGAGACTAAAG*C		GGTACGCTCTGTAAAATCAAGTCCACCRC*G
102	133	10nt ed5	0	GTAACTCGTT	22	GTAACTCGTT		GTAACTCGTTATGTCACCACAAACAGAGACTAAAG*C		GTAACTCGTTGTAAAATCAAGTCCACCRC*G
103	134	10nt ed5	0	GTAAGCGAGA	28	GTAAGCGAGA		GTAAGCGAGAATGTCACCACAAACAGAGACTAAAG*C		GTAAGCGAGAGTAAAATCAAGTCCACCRC*G
104	143	10nt ed5	0	GTGCACTGGA	28	GTGCACTGGA		GTGCACTGGAATGTCACCACAAACAGAGACTAAAG*C		GTGCACTGGAGTAAAATCAAGTCCACCRC*G
105	144	10nt ed5	0	GTGTACCATG	25	GTGTACCATG		GTGTACCATGATGTCACCACAAACAGAGACTAAAG*C		GTGTACCATGGTAAAATCAAGTCCACCRC*G
106	139	10nt ed5	0	GTTCGGTATA	23	GTTCGGTATA		GTTCGGTATAATGTCACCACAAACAGAGACTAAAG*C		GTTCGGTATAGTAAAATCAAGTCCACCRC*G
107	140	10nt ed5	0	GTTGCCACCT	25	GTTGCCACCT		GTTGCCACCTATGTCACCACAAACAGAGACTAAAG*C		GTTGCCACCTGTAAAATCAAGTCCACCRC*G
108	141	10nt ed5	0	TAAGAGCGCC	28	TAAGAGCGCC		TAAGAGCGCCATGTCACCACAAACAGAGACTAAAG*C		TAAGAGCGCCGTAAAATCAAGTCCACCRC*G
109	145	10nt ed5	0	TAGCGGCACT	27	TAGCGGCACT		TAGCGGCACTATGTCACCACAAACAGAGACTAAAG*C		TAGCGGCACTGTAAAATCAAGTCCACCRC*G
110	146	10nt ed5	0	TAGGCATCGG	28	TAGGCATCGG		TAGGCATCGGATGTCACCACAAACAGAGACTAAAG*C		TAGGCATCGGGTAAAATCAAGTCCACCRC*G
111	149	10nt ed5	0	TCCAATACTC	21	TCCAATACTC		TCCAATACTCATGTCACCACAAACAGAGACTAAAG*C		TCCAATACTCGTAAAATCAAGTCCACCRC*G
112	150	10nt ed5	0	TCCAGGAAGA	27	TCCAGGAAGA		TCCAGGAAGAATGTCACCACAAACAGAGACTAAAG*C		TCCAGGAAGAGTAAAATCAAGTCCACCRC*G
113	151	10nt ed5	0	TCCTCACTGG	25	TCCTCACTGG		TCCTCACTGGATGTCACCACAAACAGAGACTAAAG*C		TCCTCACTGGGTAAAATCAAGTCCACCRC*G
114	152	10nt ed5	0	TCGATCAACT	22	TCGATCAACT		TCGATCAACTATGTCACCACAAACAGAGACTAAAG*C		TCGATCAACTGTAAAATCAAGTCCACCRC*G
115	153	10nt ed5	0	TCGCTGAGAG	28	TCGCTGAGAG		TCGCTGAGAGATGTCACCACAAACAGAGACTAAAG*C		TCGCTGAGAGGTAAAATCAAGTCCACCRC*G
116	162	10nt ed5	0	TGACGTCGCA	27	TGACGTCGCA		TGACGTCGCAATGTCACCACAAACAGAGACTAAAG*C		TGACGTCGCAGTAAAATCAAGTCCACCRC*G
117	163	10nt ed5	0	TGTCATTCCT	20	TGTCATTCCT		TGTCATTCCTATGTCACCACAAACAGAGACTAAAG*C		TGTCATTCCTGTAAAATCAAGTCCACCRC*G
118	157	10nt ed5	0	TGTGGTTATG	23	TGTGGTTATG		TGTGGTTATGATGTCACCACAAACAGAGACTAAAG*C		TGTGGTTATGGTAAAATCAAGTCCACCRC*G
119	158	10nt ed5	0	TGTTACCTAC	21	TGTTACCTAC		TGTTACCTACATGTCACCACAAACAGAGACTAAAG*C		TGTTACCTACGTAAAATCAAGTCCACCRC*G
120	159	10nt ed5	0	TTAAGCCTTG	22	TTAAGCCTTG		TTAAGCCTTGATGTCACCACAAACAGAGACTAAAG*C		TTAAGCCTTGGTAAAATCAAGTCCACCRC*G
121	160	10nt ed5	0	TTACAGTACG	23	TTACAGTACG		TTACAGTACGATGTCACCACAAACAGAGACTAAAG*C		TTACAGTACGGTAAAATCAAGTCCACCRC*G
122	165	10nt ed5	0	TTCTCCTTCA	19	TTCTCCTTCA		TTCTCCTTCAATGTCACCACAAACAGAGACTAAAG*C		TTCTCCTTCAGTAAAATCAAGTCCACCRC*G
123	154	10nt ed5	0	TTGGCCAAGA	26	TTGGCCAAGA		TTGGCCAAGAATGTCACCACAAACAGAGACTAAAG*C		TTGGCCAAGAGTAAAATCAAGTCCACCRC*G
124	155	10nt ed5	0	TTGGCGGTTC	26	TTGGCGGTTC		TTGGCGGTTCATGTCACCACAAACAGAGACTAAAG*C		TTGGCGGTTCGTAAAATCAAGTCCACCRC*G
125	156	10nt ed5	0	TTGTCTCGAC	23	TTGTCTCGAC		TTGTCTCGACATGTCACCACAAACAGAGACTAAAG*C		TTGTCTCGACGTAAAATCAAGTCCACCRC*G
126	2	10nt ed5	0	TTGTTGGCGG	27	TTGTTGGCGG		TTGTTGGCGGATGTCACCACAAACAGAGACTAAAG*C		TTGTTGGCGGGTAAAATCAAGTCCACCRC*G

## Sheet: idt-well-map-by-idt-id
	Well Position
rbcLa-1-upper	A01
rbcLa-2-upper	A02
rbcLa-3-upper	A03
rbcLa-4-upper	A04
rbcLa-5-upper	A05
rbcLa-6-upper	A06
rbcLa-7-upper	A07
rbcLa-8-upper	A08
rbcLa-9-upper	A09
rbcLa-10-upper	A10
rbcLa-11-upper	A11
rbcLa-12-upper	A12
rbcLa-13-upper	B01
rbcLa-14-upper	B02
rbcLa-15-upper	B03
rbcLa-16-upper	B04
rbcLa-17-upper	B05
rbcLa-18-upper	B06
rbcLa-19-upper	B07
rbcLa-20-upper	B08
rbcLa-21-upper	B09
rbcLa-22-upper	B10
rbcLa-23-upper	B11
rbcLa-24-upper	B12
rbcLa-25-upper	C01
rbcLa-26-upper	C02
rbcLa-27-upper	C03
rbcLa-28-upper	C04
rbcLa-29-upper	C05
rbcLa-30-upper	C06
rbcLa-31-upper	C07
rbcLa-32-upper	C08
rbcLa-33-upper	C09
rbcLa-34-upper	C10
rbcLa-35-upper	C11
rbcLa-36-upper	C12
rbcLa-37-upper	D01
rbcLa-38-upper	D02
rbcLa-39-upper	D03
rbcLa-40-upper	D04
rbcLa-41-upper	D05
rbcLa-42-upper	D06
rbcLa-43-upper	D07
rbcLa-44-upper	D08
rbcLa-45-upper	D09
rbcLa-46-upper	D10
rbcLa-47-upper	D11
rbcLa-48-upper	D12
rbcLa-49-upper	E01
rbcLa-50-upper	E02
rbcLa-51-upper	E03
rbcLa-52-upper	E04
rbcLa-53-upper	E05
rbcLa-54-upper	E06
rbcLa-55-upper	E07
rbcLa-56-upper	E08
rbcLa-57-upper	E09
rbcLa-58-upper	E10
rbcLa-59-upper	E11
rbcLa-60-upper	E12
rbcLa-61-upper	F01
rbcLa-62-upper	F02
rbcLa-63-upper	F03
rbcLa-64-upper	F04
rbcLa-65-upper	F05
rbcLa-66-upper	F06
rbcLa-67-upper	F07
rbcLa-68-upper	F08
rbcLa-69-upper	F09
rbcLa-70-upper	F10
rbcLa-71-upper	F11
rbcLa-72-upper	F12
rbcLa-73-upper	G01
rbcLa-74-upper	G02
rbcLa-75-upper	G03
rbcLa-76-upper	G04
rbcLa-77-upper	G05
rbcLa-78-upper	G06
rbcLa-79-upper	G07
rbcLa-80-upper	G08
rbcLa-81-upper	G09
rbcLa-82-upper	G10
rbcLa-83-upper	G11
rbcLa-84-upper	G12
rbcLa-85-upper	H01
rbcLa-86-upper	H02
rbcLa-87-upper	H03
rbcLa-88-upper	H04
rbcLa-89-upper	H05
rbcLa-90-upper	H06
rbcLa-91-upper	H07
rbcLa-92-upper	H08
rbcLa-93-upper	H09
rbcLa-94-upper	H10
rbcLa-95-upper	H11
