# Supplementary material
Source: publisher figshare collection journal article supplement (https://plos.figshare.com/articles/dataset/_/121383)
Supplement: Supplementary file 1 [file 1 › File_S4.xlsx]

## Sheet: Sheet1
Supplementary File 4. Epicentre Nextera indexing primers incorporating 6 nt, edit distance 5 index sequences (EDITTAG IDX13-IDX32) and those Nextera indices with which they are compatible.
Nextera IDX2	5' - CAAGCAGAAGACGGCATACGAGATacatcgCGGTCTGCCTTGCCAGCCCGCTCAG - 3'
Nextera IDX3	5' - CAAGCAGAAGACGGCATACGAGATgcctaaCGGTCTGCCTTGCCAGCCCGCTCAG - 3'
Nextera IDX4	5' - CAAGCAGAAGACGGCATACGAGATtggtcaCGGTCTGCCTTGCCAGCCCGCTCAG - 3'
Nextera IDX5	5' - CAAGCAGAAGACGGCATACGAGATcactgtCGGTCTGCCTTGCCAGCCCGCTCAG - 3'
Nextera IDX6	5' - CAAGCAGAAGACGGCATACGAGATattggcCGGTCTGCCTTGCCAGCCCGCTCAG - 3'
Nextera IDX7	5' - CAAGCAGAAGACGGCATACGAGATgatctgCGGTCTGCCTTGCCAGCCCGCTCAG - 3'
Nextera IDX9	5' - CAAGCAGAAGACGGCATACGAGATctgatcCGGTCTGCCTTGCCAGCCCGCTCAG - 3'
Nextera IDX10	5' - CAAGCAGAAGACGGCATACGAGATaagctaCGGTCTGCCTTGCCAGCCCGCTCAG - 3'
Nextera IDX11	5' - CAAGCAGAAGACGGCATACGAGATgtagccCGGTCTGCCTTGCCAGCCCGCTCAG - 3'
Nextera IDX12	5' - CAAGCAGAAGACGGCATACGAGATtacaagCGGTCTGCCTTGCCAGCCCGCTCAG - 3'
EDITTAG IDX 13	5' - CAAGCAGAAGACGGCATACGAGATtgcgttCGGTCTGCCTTGCCAGCCCGCTCAG - 3'
EDITTAG IDX 15	5' - CAAGCAGAAGACGGCATACGAGATccaactCGGTCTGCCTTGCCAGCCCGCTCAG - 3'
EDITTAG IDX 16	5' - CAAGCAGAAGACGGCATACGAGATagttatCGGTCTGCCTTGCCAGCCCGCTCAG - 3'
EDITTAG IDX 17	5' - CAAGCAGAAGACGGCATACGAGATcgccatCGGTCTGCCTTGCCAGCCCGCTCAG - 3'
EDITTAG IDX 18	5' - CAAGCAGAAGACGGCATACGAGATaagaatCGGTCTGCCTTGCCAGCCCGCTCAG - 3'
EDITTAG IDX 19	5' - CAAGCAGAAGACGGCATACGAGATttgctgCGGTCTGCCTTGCCAGCCCGCTCAG - 3'
EDITTAG IDX 21	5' - CAAGCAGAAGACGGCATACGAGATctacggCGGTCTGCCTTGCCAGCCCGCTCAG - 3'
EDITTAG IDX 23	5' - CAAGCAGAAGACGGCATACGAGATtcttagCGGTCTGCCTTGCCAGCCCGCTCAG - 3'
EDITTAG IDX 25	5' - CAAGCAGAAGACGGCATACGAGATccgcagCGGTCTGCCTTGCCAGCCCGCTCAG - 3'
EDITTAG IDX 26	5' - CAAGCAGAAGACGGCATACGAGATggatgcCGGTCTGCCTTGCCAGCCCGCTCAG - 3'
EDITTAG IDX 27	5' - CAAGCAGAAGACGGCATACGAGATgattacCGGTCTGCCTTGCCAGCCCGCTCAG - 3'
EDITTAG IDX 30	5' - CAAGCAGAAGACGGCATACGAGATttatgaCGGTCTGCCTTGCCAGCCCGCTCAG - 3'
EDITTAG IDX 31	5' - CAAGCAGAAGACGGCATACGAGATactagaCGGTCTGCCTTGCCAGCCCGCTCAG - 3'
EDITTAG IDX 32	5' - CAAGCAGAAGACGGCATACGAGATggcagaCGGTCTGCCTTGCCAGCCCGCTCAG - 3'
