# Supplementary material
Source: publisher figshare collection journal article supplement (https://plos.figshare.com/articles/dataset/_/121383)
Supplement: Supplementary file 1 [file 1 › File_S5.xlsx]

## Sheet: BFIDT Adapters
Supplementary File 5. Illumina TruSeq-style adapters incorporating 10 nt, edit distance 5 index sequences. BFIDT-000 to BFIDT-0045 are also edit distance 3 from one another across the first 6 nt of the index read so either the first 6nt of the index can identify each sample and correct 1 error or all 10 nt of the index can identify the sample an correct 2 errors. Users of these tag sequences shou…
Tags BFIDT-000 to BFIDT-045 Can sequence first 6 nt for edit distance = 3 or all 10 nt for edit distance = 5
Adapter Name	Sequence Tag Number	Indexed Adapter Sequence	First 6 nt are edit distance 3?	Validated
BFIDT-000	54	5' - PHOS - GATCGGAAGAGCACACGTCTGAACTCCAGTCACagtatagcgcATCTCGTATGCCGTCTTCTGCTTG - 3'	TRUE	TRUE
BFIDT-001	0	5' - PHOS - GATCGGAAGAGCACACGTCTGAACTCCAGTCACttgttggcggATCTCGTATGCCGTCTTCTGCTTG - 3'	TRUE	TRUE
BFIDT-002	8	5' - PHOS - GATCGGAAGAGCACACGTCTGAACTCCAGTCACaaccgagttaATCTCGTATGCCGTCTTCTGCTTG - 3'	TRUE	TRUE
BFIDT-003	11	5' - PHOS - GATCGGAAGAGCACACGTCTGAACTCCAGTCACaatacttccgATCTCGTATGCCGTCTTCTGCTTG - 3'	TRUE	TRUE
BFIDT-004	17	5' - PHOS - GATCGGAAGAGCACACGTCTGAACTCCAGTCACaattaaggccATCTCGTATGCCGTCTTCTGCTTG - 3'	TRUE	TRUE
BFIDT-005	28	5' - PHOS - GATCGGAAGAGCACACGTCTGAACTCCAGTCACaccgcctattATCTCGTATGCCGTCTTCTGCTTG - 3'	TRUE	TRUE
BFIDT-006	34	5' - PHOS - GATCGGAAGAGCACACGTCTGAACTCCAGTCACaagcttatccATCTCGTATGCCGTCTTCTGCTTG - 3'	TRUE	TRUE
BFIDT-007	41	5' - PHOS - GATCGGAAGAGCACACGTCTGAACTCCAGTCACagaaccacatATCTCGTATGCCGTCTTCTGCTTG - 3'	TRUE	TRUE
BFIDT-008	49	5' - PHOS - GATCGGAAGAGCACACGTCTGAACTCCAGTCACagctcaacgaATCTCGTATGCCGTCTTCTGCTTG - 3'	TRUE	TRUE
BFIDT-009	74	5' - PHOS - GATCGGAAGAGCACACGTCTGAACTCCAGTCACccggtggaatATCTCGTATGCCGTCTTCTGCTTG - 3'	TRUE	TRUE
BFIDT-010	99	5' - PHOS - GATCGGAAGAGCACACGTCTGAACTCCAGTCACctaacgatcgATCTCGTATGCCGTCTTCTGCTTG - 3'	TRUE	TRUE
BFIDT-011	100	5' - PHOS - GATCGGAAGAGCACACGTCTGAACTCCAGTCACctacaacggcATCTCGTATGCCGTCTTCTGCTTG - 3'	TRUE	TRUE
BFIDT-012	102	5' - PHOS - GATCGGAAGAGCACACGTCTGAACTCCAGTCACctatgctaagATCTCGTATGCCGTCTTCTGCTTG - 3'	TRUE	TRUE
BFIDT-013	117	5' - PHOS - GATCGGAAGAGCACACGTCTGAACTCCAGTCACgcaggcgtatATCTCGTATGCCGTCTTCTGCTTG - 3'	TRUE	TRUE
BFIDT-014	118	5' - PHOS - GATCGGAAGAGCACACGTCTGAACTCCAGTCACgccttcaggaATCTCGTATGCCGTCTTCTGCTTG - 3'	TRUE	TRUE
BFIDT-015	119	5' - PHOS - GATCGGAAGAGCACACGTCTGAACTCCAGTCACgagagtactaATCTCGTATGCCGTCTTCTGCTTG - 3'	TRUE	TRUE
BFIDT-016	123	5' - PHOS - GATCGGAAGAGCACACGTCTGAACTCCAGTCACggcgaaggttATCTCGTATGCCGTCTTCTGCTTG - 3'	TRUE	TRUE
BFIDT-017	127	5' - PHOS - GATCGGAAGAGCACACGTCTGAACTCCAGTCACgctcctcttgATCTCGTATGCCGTCTTCTGCTTG - 3'	TRUE	TRUE
BFIDT-018	128	5' - PHOS - GATCGGAAGAGCACACGTCTGAACTCCAGTCACggtacgctctATCTCGTATGCCGTCTTCTGCTTG - 3'	TRUE	TRUE
BFIDT-019	137	5' - PHOS - GATCGGAAGAGCACACGTCTGAACTCCAGTCACgttcggtataATCTCGTATGCCGTCTTCTGCTTG - 3'	TRUE	TRUE
BFIDT-020	139	5' - PHOS - GATCGGAAGAGCACACGTCTGAACTCCAGTCACtaagagcgccATCTCGTATGCCGTCTTCTGCTTG - 3'	TRUE	TRUE
BFIDT-021	144	5' - PHOS - GATCGGAAGAGCACACGTCTGAACTCCAGTCACtaggcatcggATCTCGTATGCCGTCTTCTGCTTG - 3'	TRUE	TRUE
BFIDT-022	156	5' - PHOS - GATCGGAAGAGCACACGTCTGAACTCCAGTCACtgttacctacATCTCGTATGCCGTCTTCTGCTTG - 3'	TRUE	TRUE
BFIDT-023	160	5' - PHOS - GATCGGAAGAGCACACGTCTGAACTCCAGTCACtgacgtcgcaATCTCGTATGCCGTCTTCTGCTTG - 3'	TRUE	TRUE
BFIDT-024	1	5' - PHOS - GATCGGAAGAGCACACGTCTGAACTCCAGTCACaacaacaaccATCTCGTATGCCGTCTTCTGCTTG - 3'	TRUE	TRUE
BFIDT-025	20	5' - PHOS - GATCGGAAGAGCACACGTCTGAACTCCAGTCACacaagagcagATCTCGTATGCCGTCTTCTGCTTG - 3'	TRUE	TRUE
BFIDT-026	22	5' - PHOS - GATCGGAAGAGCACACGTCTGAACTCCAGTCACacactccaagATCTCGTATGCCGTCTTCTGCTTG - 3'	TRUE	TRUE
BFIDT-027	26	5' - PHOS - GATCGGAAGAGCACACGTCTGAACTCCAGTCACaccattgttgATCTCGTATGCCGTCTTCTGCTTG - 3'	TRUE	TRUE
BFIDT-028	37	5' - PHOS - GATCGGAAGAGCACACGTCTGAACTCCAGTCACaagtcgttgtATCTCGTATGCCGTCTTCTGCTTG - 3'	TRUE	TRUE
BFIDT-029	45	5' - PHOS - GATCGGAAGAGCACACGTCTGAACTCCAGTCACacgcaactcgATCTCGTATGCCGTCTTCTGCTTG - 3'	TRUE	TRUE
BFIDT-030	60	5' - PHOS - GATCGGAAGAGCACACGTCTGAACTCCAGTCACatgaggccacATCTCGTATGCCGTCTTCTGCTTG - 3'	TRUE	TRUE
BFIDT-031	62	5' - PHOS - GATCGGAAGAGCACACGTCTGAACTCCAGTCACattgaccgcgATCTCGTATGCCGTCTTCTGCTTG - 3'	TRUE	TRUE
BFIDT-032	64	5' - PHOS - GATCGGAAGAGCACACGTCTGAACTCCAGTCACcaacctaacaATCTCGTATGCCGTCTTCTGCTTG - 3'	TRUE	TRUE
BFIDT-033	69	5' - PHOS - GATCGGAAGAGCACACGTCTGAACTCCAGTCACccgaacagtgATCTCGTATGCCGTCTTCTGCTTG - 3'	TRUE	TRUE
BFIDT-034	75	5' - PHOS - GATCGGAAGAGCACACGTCTGAACTCCAGTCACcattcctctaATCTCGTATGCCGTCTTCTGCTTG - 3'	TRUE	TRUE
BFIDT-035	79	5' - PHOS - GATCGGAAGAGCACACGTCTGAACTCCAGTCACccagcacctaATCTCGTATGCCGTCTTCTGCTTG - 3'	TRUE	TRUE
BFIDT-036	83	5' - PHOS - GATCGGAAGAGCACACGTCTGAACTCCAGTCACcgcttggacaATCTCGTATGCCGTCTTCTGCTTG - 3'	TRUE
BFIDT-037	86	5' - PHOS - GATCGGAAGAGCACACGTCTGAACTCCAGTCACcggtaacaccATCTCGTATGCCGTCTTCTGCTTG - 3'	TRUE	TRUE
BFIDT-038	89	5' - PHOS - GATCGGAAGAGCACACGTCTGAACTCCAGTCACcgtagtatacATCTCGTATGCCGTCTTCTGCTTG - 3'	TRUE	TRUE
BFIDT-039	91	5' - PHOS - GATCGGAAGAGCACACGTCTGAACTCCAGTCACcgtctcgtgaATCTCGTATGCCGTCTTCTGCTTG - 3'	TRUE	TRUE
BFIDT-040	109	5' - PHOS - GATCGGAAGAGCACACGTCTGAACTCCAGTCACgatcacatcaATCTCGTATGCCGTCTTCTGCTTG - 3'	TRUE	TRUE
BFIDT-041	111	5' - PHOS - GATCGGAAGAGCACACGTCTGAACTCCAGTCACgatggagacgATCTCGTATGCCGTCTTCTGCTTG - 3'	TRUE	TRUE
BFIDT-042	143	5' - PHOS - GATCGGAAGAGCACACGTCTGAACTCCAGTCACtagcggcactATCTCGTATGCCGTCTTCTGCTTG - 3'	TRUE	TRUE
BFIDT-043	148	5' - PHOS - GATCGGAAGAGCACACGTCTGAACTCCAGTCACtccaggaagaATCTCGTATGCCGTCTTCTGCTTG - 3'	TRUE	TRUE
BFIDT-044	159	5' - PHOS - GATCGGAAGAGCACACGTCTGAACTCCAGTCACtctcgacgttATCTCGTATGCCGTCTTCTGCTTG - 3'	TRUE	TRUE
BFIDT-045	163	5' - PHOS - GATCGGAAGAGCACACGTCTGAACTCCAGTCACttctccttcaATCTCGTATGCCGTCTTCTGCTTG - 3'	TRUE	TRUE
Below this line (BFIDT-100 to BFIDT-188), MUST sequence all 10 nt of index
BFIDT-100	3	5' - PHOS - GATCGGAAGAGCACACGTCTGAACTCCAGTCACaacacacgtgATCTCGTATGCCGTCTTCTGCTTG - 3'	FALSE	TRUE
BFIDT-101	5	5' - PHOS - GATCGGAAGAGCACACGTCTGAACTCCAGTCACaacagtctctATCTCGTATGCCGTCTTCTGCTTG - 3'	FALSE
BFIDT-102	9	5' - PHOS - GATCGGAAGAGCACACGTCTGAACTCCAGTCACaacctccggtATCTCGTATGCCGTCTTCTGCTTG - 3'	FALSE	TRUE
BFIDT-103	33	5' - PHOS - GATCGGAAGAGCACACGTCTGAACTCCAGTCACaagatctgagATCTCGTATGCCGTCTTCTGCTTG - 3'	FALSE	TRUE
BFIDT-104	35	5' - PHOS - GATCGGAAGAGCACACGTCTGAACTCCAGTCACaaggccgtcaATCTCGTATGCCGTCTTCTGCTTG - 3'	FALSE	TRUE
BFIDT-105	36	5' - PHOS - GATCGGAAGAGCACACGTCTGAACTCCAGTCACaaggtgcctgATCTCGTATGCCGTCTTCTGCTTG - 3'	FALSE	TRUE
BFIDT-106	12	5' - PHOS - GATCGGAAGAGCACACGTCTGAACTCCAGTCACaataggtagcATCTCGTATGCCGTCTTCTGCTTG - 3'	FALSE	TRUE
BFIDT-107	15	5' - PHOS - GATCGGAAGAGCACACGTCTGAACTCCAGTCACaatgcactacATCTCGTATGCCGTCTTCTGCTTG - 3'	FALSE	TRUE
BFIDT-108	21	5' - PHOS - GATCGGAAGAGCACACGTCTGAACTCCAGTCACacacgtatgaATCTCGTATGCCGTCTTCTGCTTG - 3'	FALSE
BFIDT-109	23	5' - PHOS - GATCGGAAGAGCACACGTCTGAACTCCAGTCACacagaagactATCTCGTATGCCGTCTTCTGCTTG - 3'	FALSE
BFIDT-110	25	5' - PHOS - GATCGGAAGAGCACACGTCTGAACTCCAGTCACacatggtccaATCTCGTATGCCGTCTTCTGCTTG - 3'	FALSE	TRUE
BFIDT-111	29	5' - PHOS - GATCGGAAGAGCACACGTCTGAACTCCAGTCACaccggtaacgATCTCGTATGCCGTCTTCTGCTTG - 3'	FALSE	TRUE
BFIDT-112	30	5' - PHOS - GATCGGAAGAGCACACGTCTGAACTCCAGTCACaccgtgagtcATCTCGTATGCCGTCTTCTGCTTG - 3'	FALSE	TRUE
BFIDT-113	31	5' - PHOS - GATCGGAAGAGCACACGTCTGAACTCCAGTCACacctcttgaaATCTCGTATGCCGTCTTCTGCTTG - 3'	FALSE	TRUE
BFIDT-114	32	5' - PHOS - GATCGGAAGAGCACACGTCTGAACTCCAGTCACaccttaccttATCTCGTATGCCGTCTTCTGCTTG - 3'	FALSE	TRUE
BFIDT-115	46	5' - PHOS - GATCGGAAGAGCACACGTCTGAACTCCAGTCACacggttctaaATCTCGTATGCCGTCTTCTGCTTG - 3'	FALSE	TRUE
BFIDT-116	38	5' - PHOS - GATCGGAAGAGCACACGTCTGAACTCCAGTCACactggcttggATCTCGTATGCCGTCTTCTGCTTG - 3'	FALSE
BFIDT-117	39	5' - PHOS - GATCGGAAGAGCACACGTCTGAACTCCAGTCACacttagaaggATCTCGTATGCCGTCTTCTGCTTG - 3'	FALSE
BFIDT-118	40	5' - PHOS - GATCGGAAGAGCACACGTCTGAACTCCAGTCACacttccgcacATCTCGTATGCCGTCTTCTGCTTG - 3'	FALSE	TRUE
BFIDT-119	42	5' - PHOS - GATCGGAAGAGCACACGTCTGAACTCCAGTCACagaagtgaccATCTCGTATGCCGTCTTCTGCTTG - 3'	FALSE	TRUE
BFIDT-120	44	5' - PHOS - GATCGGAAGAGCACACGTCTGAACTCCAGTCACagaggaagtgATCTCGTATGCCGTCTTCTGCTTG - 3'	FALSE	TRUE
BFIDT-121	48	5' - PHOS - GATCGGAAGAGCACACGTCTGAACTCCAGTCACagctactgtcATCTCGTATGCCGTCTTCTGCTTG - 3'	FALSE	TRUE
BFIDT-122	50	5' - PHOS - GATCGGAAGAGCACACGTCTGAACTCCAGTCACagctgtcataATCTCGTATGCCGTCTTCTGCTTG - 3'	FALSE	TRUE
BFIDT-123	51	5' - PHOS - GATCGGAAGAGCACACGTCTGAACTCCAGTCACaggagaatcaATCTCGTATGCCGTCTTCTGCTTG - 3'	FALSE	TRUE
BFIDT-124	52	5' - PHOS - GATCGGAAGAGCACACGTCTGAACTCCAGTCACaggcacagctATCTCGTATGCCGTCTTCTGCTTG - 3'	FALSE
BFIDT-125	53	5' - PHOS - GATCGGAAGAGCACACGTCTGAACTCCAGTCACaggcgtgtagATCTCGTATGCCGTCTTCTGCTTG - 3'	FALSE
BFIDT-126	55	5' - PHOS - GATCGGAAGAGCACACGTCTGAACTCCAGTCACagtccgactgATCTCGTATGCCGTCTTCTGCTTG - 3'	FALSE
BFIDT-127	57	5' - PHOS - GATCGGAAGAGCACACGTCTGAACTCCAGTCACatatccgtggATCTCGTATGCCGTCTTCTGCTTG - 3'	FALSE
BFIDT-128	58	5' - PHOS - GATCGGAAGAGCACACGTCTGAACTCCAGTCACatcctaggcgATCTCGTATGCCGTCTTCTGCTTG - 3'	FALSE
BFIDT-129	59	5' - PHOS - GATCGGAAGAGCACACGTCTGAACTCCAGTCACatctcgatacATCTCGTATGCCGTCTTCTGCTTG - 3'	FALSE
BFIDT-130	61	5' - PHOS - GATCGGAAGAGCACACGTCTGAACTCCAGTCACatggaaggaaATCTCGTATGCCGTCTTCTGCTTG - 3'	FALSE
BFIDT-131	63	5' - PHOS - GATCGGAAGAGCACACGTCTGAACTCCAGTCACattgtgttccATCTCGTATGCCGTCTTCTGCTTG - 3'	FALSE
BFIDT-132	65	5' - PHOS - GATCGGAAGAGCACACGTCTGAACTCCAGTCACcaactggaggATCTCGTATGCCGTCTTCTGCTTG - 3'	FALSE
BFIDT-133	66	5' - PHOS - GATCGGAAGAGCACACGTCTGAACTCCAGTCACcaagaagttcATCTCGTATGCCGTCTTCTGCTTG - 3'	FALSE
BFIDT-134	68	5' - PHOS - GATCGGAAGAGCACACGTCTGAACTCCAGTCACcaaggttggaATCTCGTATGCCGTCTTCTGCTTG - 3'	FALSE
BFIDT-135	94	5' - PHOS - GATCGGAAGAGCACACGTCTGAACTCCAGTCACcactctgcctATCTCGTATGCCGTCTTCTGCTTG - 3'	FALSE
BFIDT-136	76	5' - PHOS - GATCGGAAGAGCACACGTCTGAACTCCAGTCACcattgagtgtATCTCGTATGCCGTCTTCTGCTTG - 3'	FALSE
BFIDT-137	80	5' - PHOS - GATCGGAAGAGCACACGTCTGAACTCCAGTCACccatatgaacATCTCGTATGCCGTCTTCTGCTTG - 3'	FALSE
BFIDT-138	81	5' - PHOS - GATCGGAAGAGCACACGTCTGAACTCCAGTCACccatcgcagtATCTCGTATGCCGTCTTCTGCTTG - 3'	FALSE
BFIDT-139	71	5' - PHOS - GATCGGAAGAGCACACGTCTGAACTCCAGTCACccgactaagcATCTCGTATGCCGTCTTCTGCTTG - 3'	FALSE
BFIDT-140	72	5' - PHOS - GATCGGAAGAGCACACGTCTGAACTCCAGTCACccgaggtcttATCTCGTATGCCGTCTTCTGCTTG - 3'	FALSE
BFIDT-141	73	5' - PHOS - GATCGGAAGAGCACACGTCTGAACTCCAGTCACccgccgttaaATCTCGTATGCCGTCTTCTGCTTG - 3'	FALSE
BFIDT-142	95	5' - PHOS - GATCGGAAGAGCACACGTCTGAACTCCAGTCACccgttcttccATCTCGTATGCCGTCTTCTGCTTG - 3'	FALSE
BFIDT-143	96	5' - PHOS - GATCGGAAGAGCACACGTCTGAACTCCAGTCACcctgttagctATCTCGTATGCCGTCTTCTGCTTG - 3'	FALSE
BFIDT-144	97	5' - PHOS - GATCGGAAGAGCACACGTCTGAACTCCAGTCACccttgtcgagATCTCGTATGCCGTCTTCTGCTTG - 3'	FALSE
BFIDT-145	92	5' - PHOS - GATCGGAAGAGCACACGTCTGAACTCCAGTCACcgataggctgATCTCGTATGCCGTCTTCTGCTTG - 3'	FALSE
BFIDT-146	93	5' - PHOS - GATCGGAAGAGCACACGTCTGAACTCCAGTCACcgccagcattATCTCGTATGCCGTCTTCTGCTTG - 3'	FALSE
BFIDT-147	85	5' - PHOS - GATCGGAAGAGCACACGTCTGAACTCCAGTCACcggatgaggaATCTCGTATGCCGTCTTCTGCTTG - 3'	FALSE
BFIDT-148	90	5' - PHOS - GATCGGAAGAGCACACGTCTGAACTCCAGTCACcgtcaagaagATCTCGTATGCCGTCTTCTGCTTG - 3'	FALSE
BFIDT-149	98	5' - PHOS - GATCGGAAGAGCACACGTCTGAACTCCAGTCACcgtgccaatcATCTCGTATGCCGTCTTCTGCTTG - 3'	FALSE
BFIDT-150	101	5' - PHOS - GATCGGAAGAGCACACGTCTGAACTCCAGTCACctacgtgattATCTCGTATGCCGTCTTCTGCTTG - 3'	FALSE
BFIDT-151	103	5' - PHOS - GATCGGAAGAGCACACGTCTGAACTCCAGTCACctggactctcATCTCGTATGCCGTCTTCTGCTTG - 3'	FALSE
BFIDT-152	104	5' - PHOS - GATCGGAAGAGCACACGTCTGAACTCCAGTCACctggttccgtATCTCGTATGCCGTCTTCTGCTTG - 3'	FALSE
BFIDT-153	105	5' - PHOS - GATCGGAAGAGCACACGTCTGAACTCCAGTCACcttagctgcaATCTCGTATGCCGTCTTCTGCTTG - 3'	FALSE
BFIDT-154	106	5' - PHOS - GATCGGAAGAGCACACGTCTGAACTCCAGTCACcttattggtcATCTCGTATGCCGTCTTCTGCTTG - 3'	FALSE
BFIDT-155	107	5' - PHOS - GATCGGAAGAGCACACGTCTGAACTCCAGTCACcttccatagtATCTCGTATGCCGTCTTCTGCTTG - 3'	FALSE
BFIDT-156	115	5' - PHOS - GATCGGAAGAGCACACGTCTGAACTCCAGTCACgaactctcgcATCTCGTATGCCGTCTTCTGCTTG - 3'	FALSE
BFIDT-157	116	5' - PHOS - GATCGGAAGAGCACACGTCTGAACTCCAGTCACgacctattctATCTCGTATGCCGTCTTCTGCTTG - 3'	FALSE
BFIDT-158	120	5' - PHOS - GATCGGAAGAGCACACGTCTGAACTCCAGTCACgaggaataacATCTCGTATGCCGTCTTCTGCTTG - 3'	FALSE
BFIDT-159	121	5' - PHOS - GATCGGAAGAGCACACGTCTGAACTCCAGTCACgagttggatcATCTCGTATGCCGTCTTCTGCTTG - 3'	FALSE
BFIDT-160	110	5' - PHOS - GATCGGAAGAGCACACGTCTGAACTCCAGTCACgatgatcagtATCTCGTATGCCGTCTTCTGCTTG - 3'	FALSE
BFIDT-161	112	5' - PHOS - GATCGGAAGAGCACACGTCTGAACTCCAGTCACgattcgccagATCTCGTATGCCGTCTTCTGCTTG - 3'	FALSE
BFIDT-162	113	5' - PHOS - GATCGGAAGAGCACACGTCTGAACTCCAGTCACgcaattaccgATCTCGTATGCCGTCTTCTGCTTG - 3'	FALSE
BFIDT-163	114	5' - PHOS - GATCGGAAGAGCACACGTCTGAACTCCAGTCACgcactagataATCTCGTATGCCGTCTTCTGCTTG - 3'	FALSE
BFIDT-164	126	5' - PHOS - GATCGGAAGAGCACACGTCTGAACTCCAGTCACgctaagtcacATCTCGTATGCCGTCTTCTGCTTG - 3'	FALSE
BFIDT-165	133	5' - PHOS - GATCGGAAGAGCACACGTCTGAACTCCAGTCACggaagacctcATCTCGTATGCCGTCTTCTGCTTG - 3'	FALSE
BFIDT-166	134	5' - PHOS - GATCGGAAGAGCACACGTCTGAACTCCAGTCACggagctatggATCTCGTATGCCGTCTTCTGCTTG - 3'	FALSE
BFIDT-167	135	5' - PHOS - GATCGGAAGAGCACACGTCTGAACTCCAGTCACggatacaagcATCTCGTATGCCGTCTTCTGCTTG - 3'	FALSE
BFIDT-168	122	5' - PHOS - GATCGGAAGAGCACACGTCTGAACTCCAGTCACggcatcctaaATCTCGTATGCCGTCTTCTGCTTG - 3'	FALSE
BFIDT-169	125	5' - PHOS - GATCGGAAGAGCACACGTCTGAACTCCAGTCACggcgttacatATCTCGTATGCCGTCTTCTGCTTG - 3'	FALSE
BFIDT-170	129	5' - PHOS - GATCGGAAGAGCACACGTCTGAACTCCAGTCACggtgcagcaaATCTCGTATGCCGTCTTCTGCTTG - 3'	FALSE
BFIDT-171	130	5' - PHOS - GATCGGAAGAGCACACGTCTGAACTCCAGTCACggttgtggctATCTCGTATGCCGTCTTCTGCTTG - 3'	FALSE
BFIDT-172	131	5' - PHOS - GATCGGAAGAGCACACGTCTGAACTCCAGTCACgtaactcgttATCTCGTATGCCGTCTTCTGCTTG - 3'	FALSE
BFIDT-173	132	5' - PHOS - GATCGGAAGAGCACACGTCTGAACTCCAGTCACgtaagcgagaATCTCGTATGCCGTCTTCTGCTTG - 3'	FALSE
BFIDT-174	140	5' - PHOS - GATCGGAAGAGCACACGTCTGAACTCCAGTCACgtgagatgatATCTCGTATGCCGTCTTCTGCTTG - 3'	FALSE
BFIDT-175	141	5' - PHOS - GATCGGAAGAGCACACGTCTGAACTCCAGTCACgtgcactggaATCTCGTATGCCGTCTTCTGCTTG - 3'	FALSE
BFIDT-176	136	5' - PHOS - GATCGGAAGAGCACACGTCTGAACTCCAGTCACgttcatgaccATCTCGTATGCCGTCTTCTGCTTG - 3'	FALSE
BFIDT-177	138	5' - PHOS - GATCGGAAGAGCACACGTCTGAACTCCAGTCACgttgccacctATCTCGTATGCCGTCTTCTGCTTG - 3'	FALSE
BFIDT-178	145	5' - PHOS - GATCGGAAGAGCACACGTCTGAACTCCAGTCACtagtgatgcaATCTCGTATGCCGTCTTCTGCTTG - 3'	FALSE
BFIDT-179	147	5' - PHOS - GATCGGAAGAGCACACGTCTGAACTCCAGTCACtccaatactcATCTCGTATGCCGTCTTCTGCTTG - 3'	FALSE
BFIDT-180	149	5' - PHOS - GATCGGAAGAGCACACGTCTGAACTCCAGTCACtcctcactggATCTCGTATGCCGTCTTCTGCTTG - 3'	FALSE
BFIDT-181	150	5' - PHOS - GATCGGAAGAGCACACGTCTGAACTCCAGTCACtcgatcaactATCTCGTATGCCGTCTTCTGCTTG - 3'	FALSE
BFIDT-182	151	5' - PHOS - GATCGGAAGAGCACACGTCTGAACTCCAGTCACtcgctgagagATCTCGTATGCCGTCTTCTGCTTG - 3'	FALSE
BFIDT-183	161	5' - PHOS - GATCGGAAGAGCACACGTCTGAACTCCAGTCACtgtcattcctATCTCGTATGCCGTCTTCTGCTTG - 3'	FALSE
BFIDT-184	155	5' - PHOS - GATCGGAAGAGCACACGTCTGAACTCCAGTCACtgtggttatgATCTCGTATGCCGTCTTCTGCTTG - 3'	FALSE
BFIDT-185	158	5' - PHOS - GATCGGAAGAGCACACGTCTGAACTCCAGTCACttacagtacgATCTCGTATGCCGTCTTCTGCTTG - 3'	FALSE
BFIDT-186	162	5' - PHOS - GATCGGAAGAGCACACGTCTGAACTCCAGTCACttcggagcacATCTCGTATGCCGTCTTCTGCTTG - 3'	FALSE
BFIDT-187	152	5' - PHOS - GATCGGAAGAGCACACGTCTGAACTCCAGTCACttggccaagaATCTCGTATGCCGTCTTCTGCTTG - 3'	FALSE
BFIDT-188	154	5' - PHOS - GATCGGAAGAGCACACGTCTGAACTCCAGTCACttgtctcgacATCTCGTATGCCGTCTTCTGCTTG - 3'	FALSE

## Sheet: Demultiplexing Info
	10 nt Demultiplex	6 nt demultiplex
idt003	TAACTCGGTT	TCGGTT				BFIDT-002	Tag3	Lane 1,2,3
idt004	CGGAAGTATT	AGTATT				BFIDT-003	Tag4	Lane 1,2,3
idt005	GGCCTTAATT	TTAATT				BFIDT-004	Tag5	Lane 1,2,3
idt010	GGATAAGCTT	AAGCTT				BFIDT-006	Tag10	Lane 1,2,3
idt026	CGATCGTTAG	CGTTAG				BFIDT-010	Tag26	Lane 1,2,3
idt027	GCCGTTGTAG	TTGTAG				BFIDT-011	Tag27	Lane 1,2,3
idt032	TCCTGAAGGC	GAAGGC				BFIDT-014	Tag32	Lane 1,2,3
idt034	AACCTTCGCC	TTCGCC				BFIDT-016	Tag34	Lane 1,2,3
idt038	GGCGCTCTTA	CTCTTA				BFIDT-020	Tag38	Lane 1,2,3
idt040	CCGATGCCTA	TGCCTA				BFIDT-021	Tag40	Lane 1,2,3
idt042	GTAGGTAACA	GTAACA				BFIDT-022	Tag42	Lane 1,2,3
idt044	TGCGACGTCA	ACGTCA				BFIDT-023	Tag44	Lane 1,2,3
idt000	GCGCTATACT	TATACT				BFIDT-000	Tag0	Lane 1,2
idt001	CCGCCAACAA	CAACAA				BFIDT-001	Tag1	Lane 1,2
idt002	GGTTGTTGTT	GTTGTT				BFIDT-024	Tag2	Lane 1,2
idt006	CTGCTCTTGT	TCTTGT				BFIDT-025	Tag6	Lane 1,2
idt007	CTTGGAGTGT	GAGTGT				BFIDT-026	Tag7	Lane 1,2
idt008	CAACAATGGT	AATGGT				BFIDT-027	Tag8	Lane 1,2
idt011	ACAACGACTT	CGACTT				BFIDT-028	Tag11	Lane 1,2
idt013	CGAGTTGCGT	TTGCGT				BFIDT-029	Tag13	Lane 1,2
idt015	GTGGCCTCAT	CCTCAT				BFIDT-030	Tag15	Lane 1,2
idt016	CGCGGTCAAT	GTCAAT				BFIDT-031	Tag16	Lane 1,2
idt017	TGTTAGGTTG	AGGTTG				BFIDT-032	Tag17	Lane 1,2
idt018	CACTGTTCGG	GTTCGG				BFIDT-033	Tag18	Lane 1,2
idt020	TAGAGGAATG	GGAATG				BFIDT-034	Tag20	Lane 1,2
idt021	TAGGTGCTGG	TGCTGG				BFIDT-035	Tag21	Lane 1,2
idt022	TGTCCAAGCG	CAAGCG				BFIDT-036	Tag22	Lane 1,2
idt023	GGTGTTACCG	TTACCG				BFIDT-037	Tag23	Lane 1,2
idt024	GTATACTACG	ACTACG				BFIDT-038	Tag24	Lane 1,2
idt025	TCACGAGACG	GAGACG				BFIDT-039	Tag25	Lane 1,2
idt029	TGATGTGATC	GTGATC				BFIDT-040	Tag29	Lane 1,2
idt030	CGTCTCCATC	TCCATC				BFIDT-041	Tag30	Lane 1,2
idt031	ATACGCCTGC	GCCTGC				BFIDT-013	Tag31	Lane 1,2
idt039	AGTGCCGCTA	CCGCTA				BFIDT-042	Tag39	Lane 1,2
idt041	TCTTCCTGGA	CCTGGA				BFIDT-043	Tag41	Lane 1,2
idt043	AACGTCGAGA	TCGAGA				BFIDT-044	Tag43	Lane 1,2
idt045	TGAAGGAGAA	GGAGAA				BFIDT-045	Tag45	Lane 1,2
idt100	CACGTGTGTT	TGTGTT				BFIDT-100	Tag100	Lane 1,2
idt102	ACCGGAGGTT	GAGGTT				BFIDT-102	Tag102	Lane 1,2
idt103	CTCAGATCTT	GATCTT				BFIDT-103	Tag103	Lane 1,2
idt104	TGACGGCCTT	GGCCTT				BFIDT-104	Tag104	Lane 1,2
idt105	CAGGCACCTT	CACCTT				BFIDT-105	Tag105	Lane 1,2
idt106	GCTACCTATT	CCTATT				BFIDT-106	Tag106	Lane 1,2
idt107	GTAGTGCATT	TGCATT				BFIDT-107	Tag107	Lane 1,2
idt110	TGGACCATGT	CCATGT				BFIDT-110	Tag110	Lane 1,2
idt111	CGTTACCGGT	ACCGGT				BFIDT-111	Tag111	Lane 1,2
idt112	GACTCACGGT	CACGGT				BFIDT-112	Tag112	Lane 1,2
idt113	TTCAAGAGGT	AGAGGT				BFIDT-113	Tag113	Lane 1,2
idt114	AAGGTAAGGT	TAAGGT				BFIDT-114	Tag114	Lane 1,2
idt115	TTAGAACCGT	AACCGT				BFIDT-115	Tag115	Lane 1,2
idt118	GTGCGGAAGT	GGAAGT				BFIDT-118	Tag118	Lane 1,2
idt119	GGTCACTTCT	ACTTCT				BFIDT-119	Tag119	Lane 1,2
idt120	CACTTCCTCT	TCCTCT				BFIDT-120	Tag120	Lane 1,2
idt121	GACAGTAGCT	GTAGCT				BFIDT-121	Tag121	Lane 1,2
idt122	TATGACAGCT	ACAGCT				BFIDT-122	Tag122	Lane 1,2
idt123	TGATTCTCCT	TCTCCT				BFIDT-123	Tag123	Lane 1,2
idt009	AATAGGCGGT	GGCGGT				BFIDT-005	Tag9	Lane 3
idt012	ATGTGGTTCT	GGTTCT				BFIDT-007	Tag12	Lane 3
idt014	TCGTTGAGCT	TGAGCT				BFIDT-008	Tag14	Lane 3
idt019	ATTCCACCGG	CACCGG				BFIDT-009	Tag19	Lane 3
idt028	CTTAGCATAG	GCATAG				BFIDT-012	Tag28	Lane 3
idt033	TAGTACTCTC	ACTCTC				BFIDT-015	Tag33	Lane 3
idt035	CAAGAGGAGC	AGGAGC				BFIDT-017	Tag35	Lane 3
idt037	TATACCGAAC	CCGAAC				BFIDT-019	Tag37	Lane 3
						BFIDT-018	Tag36	Untested
						BFIDT-101	Tag101	Untested
						BFIDT-108	Tag108	Untested
						BFIDT-109	Tag109	Untested
						BFIDT-116	Tag116	Untested
						BFIDT-117	Tag117	Untested
						BFIDT-124	Tag124	Untested
						BFIDT-125	Tag125	Untested
						BFIDT-126	Tag126	Untested
						BFIDT-127	Tag127	Untested
						BFIDT-128	Tag128	Untested
						BFIDT-129	Tag129	Untested
						BFIDT-130	Tag130	Untested
						BFIDT-131	Tag131	Untested
						BFIDT-132	Tag132	Untested
						BFIDT-133	Tag133	Untested
						BFIDT-134	Tag134	Untested
						BFIDT-135	Tag135	Untested
						BFIDT-136	Tag136	Untested
						BFIDT-137	Tag137	Untested
						BFIDT-138	Tag138	Untested
						BFIDT-139	Tag139	Untested
						BFIDT-140	Tag140	Untested
						BFIDT-141	Tag141	Untested
						BFIDT-142	Tag142	Untested
						BFIDT-143	Tag143	Untested
						BFIDT-144	Tag144	Untested
						BFIDT-145	Tag145	Untested
						BFIDT-146	Tag146	Untested
						BFIDT-147	Tag147	Untested
						BFIDT-148	Tag148	Untested
						BFIDT-149	Tag149	Untested
						BFIDT-150	Tag150	Untested
						BFIDT-151	Tag151	Untested
						BFIDT-152	Tag152	Untested
						BFIDT-153	Tag153	Untested
						BFIDT-154	Tag154	Untested
						BFIDT-155	Tag155	Untested
						BFIDT-156	Tag156	Untested
						BFIDT-157	Tag157	Untested
						BFIDT-158	Tag158	Untested
						BFIDT-159	Tag159	Untested
						BFIDT-160	Tag160	Untested
						BFIDT-161	Tag161	Untested
						BFIDT-162	Tag162	Untested
						BFIDT-163	Tag163	Untested
						BFIDT-164	Tag164	Untested
						BFIDT-165	Tag165	Untested
						BFIDT-166	Tag166	Untested
						BFIDT-167	Tag167	Untested
						BFIDT-168	Tag168	Untested
						BFIDT-169	Tag169	Untested
						BFIDT-170	Tag170	Untested
						BFIDT-171	Tag171	Untested
						BFIDT-172	Tag172	Untested
						BFIDT-173	Tag173	Untested
						BFIDT-174	Tag174	Untested
						BFIDT-175	Tag175	Untested
						BFIDT-176	Tag176	Untested
						BFIDT-177	Tag177	Untested
						BFIDT-178	Tag178	Untested
						BFIDT-179	Tag179	Untested
						BFIDT-180	Tag180	Untested
						BFIDT-181	Tag181	Untested
						BFIDT-182	Tag182	Untested
						BFIDT-183	Tag183	Untested
						BFIDT-184	Tag184	Untested
						BFIDT-185	Tag185	Untested
						BFIDT-186	Tag186	Untested
						BFIDT-187	Tag187	Untested
						BFIDT-188	Tag188	Untested

## Sheet: Compatible with TruSeq
Adapter Name	6 nt demultiplex
IDX2	CGATGT
IDX4	TGACCA
IDX5	ACAGTG
IDX6	GCCAAT
IDX7	CAGATC
IDX9	GATCAG
IDX12	CTTGTA
IDX15	ATGTCA
IDX16	CCGTCC
IDX18	GTCCGC
IDX19	GTGAAA
IDX20	GTGGCC
IDX21	GTTTCG
IDX23	GAGTGG
IDX24	GGTAGC
BFIDT-001	AGTATA
BFIDT-024	TTGTTG
BFIDT-002	AACCGA
BFIDT-003	AATACT
BFIDT-004	AATTAA
BFIDT-026	AAGCTT
BFIDT-027	AGAACC
BFIDT-028	CTAACG
BFIDT-007	CTACAA
BFIDT-008	GCAGGC
BFIDT-030	GCCTTC
BFIDT-032	GGCGAA
BFIDT-033	GCTCCT
BFIDT-035	TAAGAG
BFIDT-036	TAGGCA
BFIDT-037	TGTTAC
BFIDT-038	GGTAGC
