# Supplementary material
Source: publisher figshare collection journal article supplement (https://plos.figshare.com/articles/dataset/_/121383)
Supplement: Supplementary file 1 [file 1 › File_S6.xlsx]

## Sheet: Fig3-EDITTAG 5nt-Edit
Figure 3. Pairwise edit distance between 25 tags of five nucleotides in length and edit distance 3 designed using EDITTAG.
	TGCAT	AACAC	AAGCG	ACAAG	ACCGA	ACGTC	AGACT	AGGAA	AGTGG	ATCTG	ATTCC	CAATC	CACCT	CATGA	CCACA	CCTAT	CGGTT	CTAGG	GAAGT	GCTTA	GGATG	GGTAC	GTCAA	TCAGC
AACAC	3
AAGCG	4	3
ACAAG	4	3	3
ACCGA	4	3	3	3
ACGTC	4	3	3	3	3
AGACT	3	3	3	3	4	3
AGGAA	3	3	3	3	3	3	3
AGTGG	4	4	3	3	3	3	3	3
ATCTG	4	3	3	3	3	3	3	4	3
ATTCC	4	3	3	4	4	3	3	4	3	3
CAATC	4	3	3	3	5	3	4	5	4	4	3
CACCT	3	3	3	4	3	3	3	5	5	3	4	3
CATGA	4	4	4	3	3	4	4	3	3	4	4	3	3
CCACA	4	3	4	3	3	4	3	4	5	5	4	3	3	3
CCTAT	3	4	5	3	3	4	4	4	4	4	4	3	3	3	3
CGGTT	3	5	4	5	4	3	3	3	4	4	5	3	3	4	4	3
CTAGG	5	5	3	3	4	5	4	4	3	3	4	3	4	3	3	3	4
GAAGT	3	4	3	3	4	3	3	4	4	4	5	3	3	3	4	4	4	3
GCTTA	3	5	5	4	3	3	4	4	4	4	4	4	4	3	3	3	3	4	4
GGATG	3	5	4	3	5	4	3	3	3	3	5	3	5	3	4	4	3	3	3	3
GGTAC	3	3	5	4	5	3	3	3	3	5	3	4	5	4	4	3	3	4	4	3	3
GTCAA	3	3	5	3	3	4	4	3	4	3	4	4	4	4	3	4	5	4	4	3	4	3
TCAGC	3	3	3	3	3	3	4	5	4	3	4	3	3	3	3	4	4	3	3	4	4	4	3
TTGAC	3	3	4	4	4	3	3	3	4	4	3	4	5	3	4	4	4	4	5	4	4	3	3	3

## Sheet: SuppFig3-Adey et al. 2010-Edit
Figure S3. Pairwise edit distances between 96 sequence tags described in Adey et al. 2010, Supplementary Table 4. The minimum expected edit distance of the set is four. The minimum observed edit distance of the set is two.
	TACGAAGTC	GACGAGATT	ACCGTAAGA	TAGTGGCAA	CATTAACGC	TCGTTGAAG	TAGTACGCT	CTCAGATCA	TTCACCGTA	GTCATGCAT	AGGACAGTT	ATGGTGTCT	GGATGTTCT	CTTATCCAG	GTAAGTCAC	TTCAGTGAG	CTCGTAATG	CATGTCTCA	AATCGTGGA	GTATCAGTC	AGCAGATGT	TCCTAACGT	AACAGTCCA	CCTTGAGAA	TTAAGCCTG	TTAGACCAC	TGTCTAGTG	TAGATCGAG	TGAATGCCA	GTGCAATGT	AGTGGCATA	ATGATCGGT	AGTCTACCT	GATCAACTG	ATCGGTAGT	CGTATGATG	TTACTGACG	CTGTCGTAA	TCAACTGGT	ATCGATCTC	GCAACTATG	GATGACTTC	GACGTTACA	CATCTGCTA	ATTAGTCGG	TAGCGTACT	CCAAGCAAT	CCGTAATTG	AGAATTGCC
GACGAGATT	4
ACCGTAAGA	5	6
TAGTGGCAA	6	7	6
CATTAACGC	5	7	5	6
TCGTTGAAG	6	6	5	4	5
TAGTACGCT	5	6	6	4	4	6
CTCAGATCA	6	5	6	6	6	6	6
TTCACCGTA	5	7	6	7	6	6	6	5
GTCATGCAT	6	5	7	5	7	5	5	5	5
AGGACAGTT	4	4	6	6	7	7	4	7	5	6
ATGGTGTCT	5	6	6	5	7	6	5	6	7	5	5
GGATGTTCT	6	5	8	7	7	7	6	6	8	5	5	4
CTTATCCAG	7	8	7	6	5	5	7	5	6	4	7	7	7
GTAAGTCAC	6	6	6	5	6	7	5	4	6	4	6	6	5	5
TTCAGTGAG	6	6	5	5	6	4	6	4	4	4	7	6	7	5	4
CTCGTAATG	5	5	4	7	5	4	6	5	6	5	7	6	7	5	6	4
CATGTCTCA	6	7	6	5	5	7	5	5	7	6	7	4	4	4	5	7	6
AATCGTGGA	6	6	4	5	6	5	7	6	6	5	7	5	6	7	7	5	6	5
GTATCAGTC	4	5	7	7	6	7	6	5	5	4	4	6	5	5	4	5	6	6	6
AGCAGATGT	5	4	5	7	6	6	6	4	6	6	4	5	5	8	7	5	6	7	6	6
TCCTAACGT	4	6	4	6	4	5	4	6	4	5	7	6	7	6	7	6	4	7	7	6	5
AACAGTCCA	5	6	5	5	7	7	6	4	6	5	5	6	6	5	5	5	7	4	4	5	5	7
CCTTGAGAA	7	6	4	5	5	4	7	5	6	6	7	7	7	6	7	6	6	6	5	6	7	6	7
TTAAGCCTG	6	7	8	6	6	7	5	6	4	5	7	6	6	4	4	4	6	6	6	6	6	5	6	7
TTAGACCAC	5	7	7	5	5	6	5	4	5	6	7	7	7	4	4	5	7	6	7	6	7	6	5	6	4
TGTCTAGTG	5	5	7	7	6	5	6	6	5	6	5	6	6	6	6	4	4	6	6	4	5	5	7	6	5	7
TAGATCGAG	5	6	7	4	6	4	4	4	5	6	6	7	7	4	5	4	6	6	5	6	6	6	5	6	5	4	5
TGAATGCCA	5	7	7	4	6	6	5	5	6	5	7	5	5	5	5	6	6	5	6	6	6	7	5	7	4	5	6	5
GTGCAATGT	5	5	6	6	6	6	6	5	5	4	5	5	6	7	6	5	4	7	7	5	3	4	7	8	6	7	5	7	5
AGTGGCATA	7	6	5	2	7	6	5	6	6	5	4	5	6	7	6	7	6	5	5	5	5	7	6	6	6	7	6	6	6	5
ATGATCGGT	6	6	6	7	5	7	5	6	5	5	4	4	5	5	6	6	7	5	5	4	5	6	6	7	6	6	5	4	6	5	6
AGTCTACCT	7	6	6	6	6	7	4	6	5	4	5	5	5	6	6	8	6	5	6	6	5	5	6	7	6	6	4	6	5	5	5	6
GATCAACTG	5	5	7	7	4	6	6	6	5	5	6	7	5	6	6	6	5	6	6	4	5	6	6	7	5	7	4	5	7	4	7	5	5
ATCGGTAGT	5	5	4	6	7	5	5	6	6	5	5	4	6	7	6	4	4	7	4	6	4	5	5	7	7	7	5	6	8	5	5	4	5	6
CGTATGATG	6	5	5	7	5	3	5	5	7	4	6	7	5	4	6	5	4	6	7	4	4	6	8	5	5	7	4	5	5	5	5	6	6	5	6
TTACTGACG	5	6	6	5	5	4	5	5	5	6	7	5	6	5	5	3	5	7	7	5	6	4	6	7	4	5	5	5	4	6	7	6	6	6	6	4
CTGTCGTAA	7	7	6	4	7	5	6	5	5	6	6	5	7	5	6	5	4	3	5	5	7	6	6	5	7	6	5	5	6	6	5	5	6	8	6	6	7
TCAACTGGT	6	7	7	6	6	6	5	6	5	5	5	7	6	6	6	5	6	7	5	6	5	4	7	7	5	6	5	6	5	4	7	4	6	4	5	6	5	7
ATCGATCTC	4	5	6	7	5	6	6	4	5	5	6	4	5	6	5	6	5	4	5	5	4	6	5	7	6	4	6	5	6	5	6	4	4	4	4	6	6	6	6
GCAACTATG	7	5	6	8	6	6	7	7	6	5	6	8	6	6	5	6	5	6	7	5	5	6	7	8	5	6	5	6	7	5	6	7	6	4	7	5	5	7	4	6
GATGACTTC	4	4	8	6	5	7	6	6	6	5	5	5	4	7	5	7	7	4	7	4	6	6	6	7	6	5	6	6	6	5	5	5	6	4	7	5	6	6	7	4	5
GACGTTACA	6	4	4	5	6	5	6	5	7	5	6	6	4	6	4	6	5	4	5	6	7	6	4	6	8	7	7	6	5	7	6	7	5	6	5	6	5	5	8	6	6	5
CATCTGCTA	7	6	6	5	5	6	5	4	5	5	7	5	5	5	7	6	5	3	4	5	6	7	5	5	6	7	5	6	5	7	5	6	5	4	5	4	6	5	4	5	5	6	6
ATTAGTCGG	6	7	6	6	4	6	5	5	6	6	7	5	7	4	4	4	6	6	4	5	5	6	4	7	4	5	5	4	6	6	6	3	6	5	4	6	5	6	6	5	6	6	7	6
TAGCGTACT	4	5	5	5	7	6	4	6	5	6	6	4	5	7	5	6	5	6	5	5	5	5	5	7	6	5	5	5	6	6	6	6	4	5	4	7	5	5	5	5	6	6	4	5	7
CCAAGCAAT	6	5	6	6	7	6	7	5	7	4	6	8	6	5	5	6	5	6	8	6	6	5	6	5	5	6	8	6	5	6	6	6	7	6	6	6	7	6	5	7	4	7	7	6	7	6
CCGTAATTG	5	5	4	7	5	5	6	6	8	7	6	7	7	6	6	6	2	6	7	6	6	5	8	5	6	8	5	7	7	5	7	7	7	5	6	4	7	5	6	6	5	6	6	7	6	6	5
AGAATTGCC	5	6	7	6	6	7	5	7	7	6	5	6	5	7	5	6	7	7	6	5	5	8	5	8	6	7	6	5	3	6	6	5	5	6	7	6	6	8	5	6	6	5	5	6	6	6	7	5
ACCTGTAAC	6	6	3	6	5	5	7	6	6	6	7	6	6	6	5	5	5	5	6	6	6	5	5	5	8	7	7	7	7	7	6	7	5	7	4	6	6	5	7	5	6	7	5	5	6	5	5	5	6
CATCAGTGT	6	5	6	7	4	7	6	4	5	5	5	5	6	6	6	4	5	5	4	4	3	5	5	6	6	8	4	6	7	4	7	5	6	4	3	5	7	5	4	5	5	5	7	4	4	5	6	5	6
GAATCCTCA	7	7	7	6	6	8	5	6	6	5	7	7	4	6	5	7	7	4	4	4	7	7	5	7	5	6	7	6	3	7	6	7	6	5	7	6	7	5	7	6	6	5	5	5	6	6	7	7	5
GCTGTATAC	6	6	5	7	6	6	6	6	7	5	7	6	5	5	5	6	5	5	6	5	5	6	6	5	8	6	6	7	6	5	5	7	6	6	6	5	6	4	8	6	5	4	4	6	7	6	6	5	7
GAAGGCTAT	7	4	7	5	8	8	6	7	7	4	6	5	4	7	4	7	7	5	7	6	5	8	5	7	5	5	6	6	4	6	5	6	5	6	5	6	7	6	6	6	4	4	5	5	7	5	4	8	6
GGAATCGAT	7	5	7	6	7	7	5	6	6	4	5	6	5	5	4	6	7	7	6	5	5	6	6	7	6	6	6	4	4	4	6	4	6	5	6	4	6	6	5	6	4	6	7	6	6	6	4	6	4
GCTTATGGT	7	6	6	7	5	6	5	6	6	4	6	6	5	5	6	6	6	7	5	5	4	4	8	5	6	8	6	7	7	5	8	4	6	6	6	4	6	6	4	7	5	6	6	5	5	6	7	5	6
TGACGCATT	4	3	7	5	7	6	4	6	5	4	5	6	5	6	6	7	6	6	7	6	5	6	7	7	4	5	5	5	5	5	4	5	6	6	6	5	5	5	6	6	6	5	5	6	7	4	4	6	7
CACGATTCT	4	4	7	7	6	7	5	4	7	5	6	4	4	6	7	7	5	4	6	6	5	6	5	7	7	7	7	6	7	6	7	5	6	6	5	6	6	7	6	4	6	4	4	5	6	4	6	5	5
TATTGCCTC	5	7	8	4	4	6	4	7	5	5	7	5	6	6	5	7	7	4	6	5	8	6	6	6	4	4	6	6	4	7	5	6	5	5	7	6	5	7	6	4	8	4	7	4	5	5	7	7	5
AAGTCAGAG	6	6	4	5	6	5	5	6	7	5	4	7	8	6	5	5	6	5	5	5	4	7	5	5	6	6	4	3	7	6	5	5	5	5	5	5	6	5	7	7	6	7	5	6	4	6	5	5	6
ATAGCTGAG	6	7	5	5	6	4	6	5	6	6	6	5	7	5	5	3	5	5	5	5	5	6	6	6	5	5	5	3	7	6	5	5	7	5	4	5	3	6	5	5	5	6	7	5	4	5	6	7	5
TGCTCACAA	6	7	6	4	6	5	6	5	5	5	6	6	7	5	6	6	6	5	7	6	6	4	6	5	7	6	5	5	5	6	5	6	5	5	7	7	5	4	7	6	6	6	5	6	8	5	6	7	7
GTCTTCTGA	8	7	5	7	7	5	7	5	5	5	8	6	5	6	6	5	5	5	5	5	6	6	6	5	6	7	4	6	6	5	6	5	5	4	6	5	5	5	5	5	6	6	5	4	6	7	8	6	7
TTGCCGATT	6	5	7	6	7	5	5	5	4	6	5	5	6	6	7	6	6	7	7	6	4	6	8	6	5	5	5	5	6	4	5	5	6	7	5	6	4	5	6	5	6	6	7	6	6	4	7	6	8
CTCGAATAC	4	5	5	7	5	6	6	4	6	6	7	6	7	6	5	5	3	6	6	6	6	6	6	5	7	4	6	6	5	5	5	7	7	6	5	6	6	5	6	4	6	5	5	5	7	5	6	4	6
TGGCTTCTA	7	7	7	5	8	5	6	6	5	6	6	4	5	7	7	7	6	5	6	7	7	6	6	7	6	7	4	5	4	6	5	7	5	6	6	6	6	5	6	5	6	5	5	4	7	4	8	7	6
AAGGCCATT	6	4	6	5	8	7	5	7	6	6	3	5	7	7	6	8	6	6	7	7	5	8	5	8	5	5	6	6	5	5	4	5	5	6	5	7	8	7	7	6	6	5	6	7	7	5	5	6	7
AAGTTGACC	6	6	6	5	4	4	5	7	7	7	7	4	6	7	5	6	7	6	5	6	6	7	5	6	7	6	7	5	6	8	5	6	4	6	6	5	5	6	7	5	7	5	4	6	6	5	7	7	3
CTGAACTGA	6	7	5	7	4	6	6	4	5	6	6	6	7	5	5	5	4	4	6	6	6	5	7	6	5	6	6	5	4	4	6	4	7	4	7	5	5	4	4	5	6	5	7	5	6	7	6	4	5
CTAGGTGTA	5	6	7	5	7	5	6	4	5	6	6	4	6	6	5	5	5	4	5	5	5	6	6	5	5	6	6	5	6	6	5	6	7	7	4	5	6	4	6	5	6	7	6	4	6	5	6	6	6
CCATCTTAG	7	7	6	7	5	5	8	5	5	6	8	7	5	4	6	5	5	5	5	6	7	6	6	5	6	7	6	5	7	8	7	7	7	6	5	5	5	4	5	6	4	6	6	4	7	6	5	4	7
CTACGACAT	4	4	7	5	6	6	5	4	6	4	5	6	6	5	4	6	4	6	7	6	6	5	6	5	5	4	7	5	6	5	6	6	5	6	5	5	4	5	6	5	6	5	5	6	6	4	4	6	8
TCCAACATG	5	5	6	7	7	5	6	6	4	5	6	8	8	6	7	5	4	8	7	6	5	3	7	7	4	6	5	5	7	5	6	7	6	4	7	5	6	7	4	5	3	6	7	7	7	6	4	5	7
GCTATCATC	6	5	6	7	6	6	7	5	6	4	6	6	5	5	4	7	5	5	7	2	6	5	7	6	6	6	6	6	7	6	5	6	5	5	7	4	6	5	6	4	4	4	6	6	6	6	5	6	6
ACAGCTTCA	6	5	5	6	7	6	7	4	5	6	6	5	5	6	6	6	7	4	5	6	5	7	3	7	6	6	8	6	6	7	5	7	6	6	6	7	6	5	5	5	5	5	4	4	6	5	6	7	5
AGTCATTGC	6	6	6	7	5	6	5	6	6	4	5	6	6	7	5	5	6	6	4	5	4	7	5	8	7	7	4	6	6	4	5	5	4	5	5	5	6	6	6	4	6	5	5	6	5	6	7	4	3
AGATCTCGA	6	6	6	5	6	7	6	6	6	6	6	5	5	6	6	7	8	4	3	6	5	6	5	7	7	6	5	4	5	7	5	4	4	5	6	6	6	6	5	4	6	6	6	4	5	7	7	7	5
ATGCTCTTG	7	6	7	7	7	6	6	7	6	6	5	4	5	5	7	6	5	4	6	6	5	6	7	8	5	7	4	5	7	5	5	4	5	5	5	6	5	5	6	4	5	4	7	5	5	6	7	5	6
TTAGTGCGT	6	6	6	4	6	6	3	6	5	4	6	4	5	5	5	3	6	7	5	5	6	5	6	7	4	4	6	5	4	6	5	5	6	8	5	6	3	5	4	6	7	6	7	6	3	5	6	7	6
TCCTAGTTC	4	5	6	6	6	5	5	5	6	6	6	6	5	6	6	5	5	5	7	5	6	4	5	6	6	6	4	7	7	6	7	6	6	7	5	5	6	6	5	5	6	5	6	6	6	6	6	4	7
GGTGCATTA	6	5	6	5	7	7	6	6	6	5	5	6	5	7	6	6	6	5	6	5	6	8	7	6	7	7	5	7	6	4	3	7	6	5	7	6	7	5	8	6	6	4	6	6	8	6	6	5	7
ACTGAGGAT	5	4	4	5	6	6	5	5	7	5	5	5	7	6	6	5	6	7	4	7	4	5	6	4	6	6	7	6	7	6	4	4	6	7	5	5	5	5	6	6	6	6	6	6	6	6	5	7	7
TAGCAGTCA	3	6	6	4	7	6	4	4	5	6	5	5	6	7	4	4	6	5	5	3	4	7	3	6	6	5	5	4	4	5	5	6	6	6	6	7	5	5	6	6	7	6	5	5	5	3	6	6	5
TCACTCGAA	6	6	6	4	6	4	5	5	3	5	7	8	8	5	5	4	6	5	6	6	7	5	5	5	6	5	5	4	5	6	6	5	7	6	6	7	4	4	4	6	6	7	6	5	5	6	5	7	6
ACCAATCAG	5	6	4	7	6	6	7	4	7	5	6	7	8	4	5	4	6	6	7	6	5	5	4	6	6	6	7	5	6	6	7	5	6	4	5	5	6	7	6	4	5	7	6	7	4	7	4	5	6
GATATGGAC	6	6	7	5	5	6	6	7	7	4	7	6	5	5	4	6	8	6	4	4	6	7	6	5	7	6	6	4	5	7	6	5	7	6	6	5	5	6	6	6	6	5	5	5	6	6	7	7	4
TGAGAGATC	4	3	7	6	7	6	5	5	6	6	5	5	5	7	5	5	6	7	7	5	5	7	6	6	5	4	5	5	5	6	5	5	7	6	6	5	5	7	6	5	6	4	6	7	7	5	6	7	6
TGCCATTAG	6	7	5	7	6	5	7	6	5	5	6	7	6	6	6	4	6	6	7	6	6	5	7	6	6	6	4	5	6	5	5	6	7	6	6	5	5	5	5	6	4	6	5	7	7	6	7	5	6
ACTAACGCA	5	7	4	6	3	7	4	5	5	5	6	6	8	5	5	7	6	5	5	6	6	4	5	5	6	5	7	6	5	7	5	5	5	6	7	7	5	5	5	5	6	6	5	5	5	6	5	6	5
ATGTAGCAC	5	6	5	4	4	5	5	6	7	5	6	5	6	5	4	6	6	4	5	5	6	6	6	6	6	4	6	6	5	6	4	5	5	6	5	6	6	4	8	4	7	5	5	5	4	6	6	6	5
GGTCGATAT	6	4	7	6	7	5	6	5	7	4	5	5	4	7	6	6	5	7	6	6	4	7	8	5	8	6	5	6	7	4	4	6	4	5	4	5	7	4	6	4	5	5	5	5	7	5	6	6	8
GCGAGTTAT	6	3	6	6	7	6	7	6	7	5	6	5	3	7	4	5	5	6	7	6	4	7	6	6	7	7	6	6	7	5	6	6	6	7	5	5	7	6	5	6	4	5	5	7	6	5	4	5	6
GACTGAGTA	4	3	5	5	6	7	6	5	5	5	5	6	6	7	5	6	6	5	5	4	5	5	5	4	7	7	4	6	5	6	5	6	6	5	5	5	5	5	5	6	5	4	4	4	6	6	7	6	6
AGATACTCC	5	6	7	7	6	8	4	6	8	7	5	5	4	6	5	8	7	5	6	5	5	7	4	8	7	5	6	5	5	7	6	5	4	5	6	6	6	7	6	4	6	3	6	6	5	5	7	6	3
GCTAGAGTT	5	3	6	7	7	6	5	5	6	6	4	5	6	7	5	6	5	7	6	4	4	5	7	4	6	6	5	6	8	5	6	6	6	5	6	5	7	6	5	6	5	4	7	7	6	5	5	5	7
AATGTAGCG	5	6	5	5	4	6	4	7	7	7	6	5	5	6	6	6	5	4	4	6	6	6	5	6	6	7	4	5	6	6	6	5	4	5	5	6	5	6	7	6	6	6	5	5	4	5	7	6	5
[truncated: 46 more columns]

## Sheet: SuppFig4-Meyer et al. 2010-Edit
Figure S4. Pairwise edit distances between 75 sequence tags designed using create_index_sequences.py from Meyer et al. 2010. We generated these tags using: `python create_index_sequences.py -l <length> -d 3`. The minimum expected edit distance of the set is three. The minimum observed edit distance of the set is two.
	AACCAG	AACGCA	AACTGC	AAGAAC	AAGCCT	AAGTTA	AATACG	AATCGA	AATGAT	ACCAAT	ACCGTC	ACCTCG	ACGAGG	ACTATA	ACTTAC	AGAAGC	AGACCG	AGAGTA	AGATAT	AGCATG	AGCCGT	AGGCTC	AGTTGG	ATAACT	ATAGAC	ATATTG	ATGGCG	ATTCTT	CAAGAG	CAATTC	CAGATG	CAGCAA	CAGGCC	CATAGC	CCAACG	CCAGGT	CCGCTT	CCGTAG	CCTGAA	CGAATT	CGATCA	CGCAAC	CGCGCT	CGTCAG	CTAAGA	CTCCAT	CTCGGC	CTGCGG	GACCTT
AACGCA	2
AACTGC	3	2
AAGAAC	3	3	3
AAGCCT	3	3	4	3
AAGTTA	4	3	3	3	3
AATACG	3	3	3	3	3	4
AATCGA	3	2	3	4	3	3	2
AATGAT	3	3	3	3	3	3	3	2
ACCAAT	3	4	4	3	4	5	4	4	3
ACCGTC	4	3	3	4	4	4	5	4	4	3
ACCTCG	3	3	3	5	4	4	3	3	5	3	2
ACGAGG	3	4	4	3	4	4	3	4	4	3	4	3
ACTATA	4	4	4	4	5	3	3	3	3	3	3	4	3
ACTTAC	4	4	3	3	5	3	3	4	3	3	3	3	4	2
AGAAGC	4	3	3	2	4	5	4	4	4	4	4	5	3	4	4
AGACCG	2	3	3	3	3	5	3	3	5	5	4	3	3	5	5	3
AGAGTA	4	3	4	3	4	2	4	4	4	4	3	5	3	3	4	3	3
AGATAT	4	5	4	3	4	3	3	4	2	3	5	4	4	3	3	3	3	2
AGCATG	3	4	3	4	3	4	3	4	4	3	3	3	3	3	4	3	3	3	3
AGCCGT	3	4	3	5	2	5	4	3	4	3	2	3	4	4	5	3	2	3	3	3
AGGCTC	4	4	3	3	3	3	5	4	4	5	3	3	4	4	4	3	3	3	4	3	3
AGTTGG	4	5	3	5	5	3	3	3	4	5	5	3	3	4	3	3	3	4	3	3	3	4
ATAACT	4	4	4	3	3	4	3	4	3	3	5	4	4	4	3	3	3	4	3	4	4	4	5
ATAGAC	4	4	4	2	3	4	3	3	3	4	3	5	4	3	3	3	4	3	3	5	5	4	4	2
ATATTG	4	5	3	5	5	3	3	3	4	4	4	3	4	3	4	4	3	3	3	3	5	4	3	3	3
ATGGCG	4	3	4	4	3	4	3	4	4	5	4	3	3	5	4	4	3	4	5	4	3	3	3	3	3	3
ATTCTT	4	5	4	5	3	4	4	3	3	4	4	4	5	3	4	5	4	4	4	4	3	3	4	3	4	3	4
CAAGAG	3	4	4	3	4	4	3	4	3	4	5	5	3	4	5	4	4	4	4	4	5	5	5	5	3	4	4	6
CAATTC	5	4	3	4	4	3	3	4	4	4	4	4	5	4	3	4	5	4	4	5	6	4	4	4	4	3	5	4	3
CAGATG	4	5	4	3	4	3	3	4	3	4	4	4	3	4	5	3	3	3	3	2	4	4	3	5	4	3	4	5	2	3
CAGCAA	3	3	5	3	3	3	5	3	4	3	5	5	5	4	5	4	4	4	4	3	4	4	5	5	4	6	5	5	3	4	3
CAGGCC	5	3	4	3	3	4	4	5	4	6	4	5	4	6	5	4	3	4	5	5	4	2	5	5	4	6	3	5	3	3	3	3
CATAGC	4	4	3	3	4	5	3	3	4	5	4	4	4	4	3	3	4	4	4	4	5	5	4	3	2	4	3	5	3	3	3	4	3
CCAACG	4	4	4	4	5	6	3	4	5	3	4	3	3	4	4	4	3	5	5	4	5	6	5	3	4	4	4	6	3	4	3	4	4	4
CCAGGT	4	5	5	5	4	4	5	5	4	3	4	4	3	5	5	4	5	4	4	4	4	4	5	4	4	5	5	5	3	4	3	4	3	4	3
CCGCTT	5	4	5	5	3	4	6	5	5	4	3	4	4	4	5	6	5	5	4	4	4	3	5	5	6	5	5	3	5	4	3	3	4	5	4	3
CCGTAG	4	4	5	4	5	4	4	5	5	4	3	3	3	4	3	4	5	4	4	4	4	5	4	6	5	4	4	6	3	4	3	3	4	3	3	4	3
CCTGAA	5	4	4	4	6	5	5	4	3	4	4	4	4	3	3	5	6	4	5	5	5	6	5	5	4	6	5	5	3	5	4	3	4	4	4	3	4	3
CGAATT	6	5	5	4	5	4	5	5	4	3	5	6	4	4	5	3	4	3	3	3	4	4	5	3	5	4	6	4	4	2	3	4	5	4	3	3	3	4	4
CGATCA	4	4	5	4	5	4	4	3	4	5	4	4	4	3	5	4	3	3	3	4	5	4	4	4	5	4	5	5	4	3	3	3	4	4	3	4	4	4	4	3
CGCAAC	4	4	4	3	5	5	5	5	5	3	4	5	4	5	4	3	4	5	4	3	4	4	5	4	4	6	6	6	4	4	4	2	4	3	2	4	4	4	4	3	3
CGCGCT	5	3	4	5	3	5	5	5	4	4	4	4	4	5	5	4	4	4	4	4	3	3	5	4	5	6	4	5	4	5	4	4	3	4	4	3	2	4	4	3	3	3
CGTCAG	3	4	5	5	5	4	4	4	4	5	4	3	4	5	4	4	3	5	4	3	4	4	3	5	5	5	4	4	3	5	4	3	4	3	4	4	4	2	3	4	2	3	4
CTAAGA	5	4	5	4	5	4	4	4	4	4	6	5	4	3	4	3	5	4	5	5	5	6	5	3	3	4	5	5	2	4	4	4	4	3	3	3	5	4	3	3	3	4	5	3
CTCCAT	3	4	5	5	4	6	5	4	4	3	4	5	5	4	4	6	5	6	4	4	3	5	6	4	4	5	5	3	4	5	4	3	5	5	4	4	3	4	4	4	4	3	3	3	4
CTCGGC	5	4	3	5	5	6	5	4	5	5	3	4	4	5	4	4	5	5	6	5	4	5	4	5	3	5	3	5	4	4	5	5	3	3	4	3	4	4	4	5	5	3	3	3	3	3
CTGCGG	4	5	4	5	4	5	4	4	5	6	5	4	3	5	5	5	4	5	6	4	4	4	4	5	5	4	3	4	4	5	3	3	4	4	4	4	3	3	4	5	5	4	3	3	3	3	2
GACCTT	3	4	4	5	3	4	5	4	4	3	3	3	5	4	4	5	3	4	4	4	3	4	5	4	6	4	6	3	5	4	4	4	5	5	5	5	3	5	5	3	4	5	4	5	6	3	5	5
GACGAC	3	3	3	3	4	5	4	3	3	4	3	4	3	4	3	3	4	4	4	5	4	4	5	4	3	6	4	6	3	4	4	4	3	4	4	5	5	4	4	5	4	3	4	4	4	4	3	5	3
GATTAG	3	5	4	4	5	3	3	4	3	5	6	4	4	4	3	4	4	3	3	4	5	5	3	4	4	3	4	4	3	4	4	4	5	3	5	6	5	3	4	4	3	5	6	3	4	5	5	5	4
GCATCC	5	5	4	5	4	5	4	4	5	5	4	3	5	4	3	4	4	5	4	3	5	4	5	4	4	4	5	5	5	3	5	4	3	3	3	4	5	4	5	4	3	3	4	4	5	4	4	5	4
GCCAGC	3	4	3	4	5	6	5	5	6	3	3	4	3	4	4	3	4	5	5	4	3	4	5	5	4	6	5	6	4	4	5	4	4	3	3	3	4	4	4	5	4	3	4	3	4	4	3	5	4
GCGACT	5	4	5	4	3	5	4	5	4	3	4	4	3	4	4	5	4	4	4	4	4	4	6	3	4	5	4	5	5	4	4	5	4	5	3	4	3	4	4	3	3	3	2	4	5	4	4	5	4
GCTCAT	4	4	5	5	4	5	5	4	3	3	4	4	5	3	3	6	5	5	3	4	3	4	5	4	5	5	6	3	5	5	4	4	6	5	5	4	3	4	3	4	3	4	3	3	4	2	4	4	3
GGCCAA	3	4	5	5	4	5	6	4	5	3	5	5	5	4	5	5	4	4	4	4	3	4	5	6	5	6	5	5	5	6	6	3	4	6	4	5	5	5	4	5	4	3	4	3	5	3	5	5	3
GGCTTC	5	5	3	5	4	4	5	6	6	5	3	4	6	4	3	4	5	4	4	3	4	2	4	6	5	4	5	4	6	3	5	5	4	5	5	6	3	5	5	4	4	3	4	5	6	5	4	5	3
GGTACC	5	5	5	4	5	5	3	5	5	5	5	5	5	4	4	3	3	4	4	4	5	4	4	4	4	5	5	5	6	5	5	5	4	3	4	6	6	4	5	4	4	3	4	4	5	5	5	5	4
GTAATC	5	5	4	4	5	5	4	4	4	4	4	5	5	4	4	3	5	4	4	4	5	4	5	3	3	3	5	4	5	3	4	5	5	4	4	5	5	5	5	3	4	3	5	4	3	4	4	5	4
GTACGT	5	4	4	5	4	5	3	4	4	5	4	5	5	5	5	4	4	4	4	4	3	5	4	3	4	4	4	3	5	5	5	5	5	4	4	3	4	4	6	4	5	5	4	4	3	3	4	3	3
GTCAAG	3	5	5	4	6	5	4	4	5	3	5	4	4	5	5	4	4	5	5	3	5	5	4	4	4	4	4	5	4	5	4	4	5	4	3	4	6	4	4	5	4	3	5	2	3	3	4	4	4
GTCTCT	5	4	4	6	4	5	5	5	5	4	4	3	6	4	5	5	4	5	4	5	4	3	4	3	5	4	4	3	6	5	6	6	5	5	5	5	4	5	5	4	4	5	3	4	5	3	4	5	3
GTTCCG	4	5	5	6	4	5	3	4	5	6	5	4	5	5	4	5	3	6	5	5	4	5	3	4	5	4	3	3	5	5	5	5	5	5	4	6	5	5	5	6	4	5	5	3	5	4	4	3	4
TACGGT	4	3	3	5	4	4	4	4	3	4	3	5	3	4	5	5	4	4	5	5	3	4	5	4	4	4	4	4	4	5	4	5	4	4	5	3	4	5	5	5	5	5	3	5	4	4	3	3	3
TACTTG	3	4	3	5	4	3	4	4	5	5	4	3	4	3	3	5	4	5	5	3	5	5	3	4	5	2	5	3	4	3	3	5	5	4	5	5	4	4	5	4	5	5	5	5	5	4	5	4	3
TATCTC	4	4	3	4	4	4	4	3	4	5	3	3	6	4	4	5	5	5	4	4	5	3	5	3	4	3	4	3	5	3	4	4	4	3	5	5	4	6	5	5	4	5	5	4	5	5	4	5	3
TCATAA	5	5	5	4	6	4	4	4	4	4	5	4	5	3	3	5	5	4	3	4	6	6	5	4	4	4	6	5	4	4	4	3	5	3	4	4	5	3	3	5	3	4	6	4	4	4	5	6	5
TCCGAG	3	4	5	5	6	6	5	4	4	3	3	3	3	5	4	5	5	5	5	4	4	6	5	6	4	5	4	5	3	6	3	4	5	4	3	4	4	2	3	5	5	4	4	4	4	3	4	3	5
TCGCCG	4	4	5	5	3	5	4	5	6	5	4	3	3	5	5	5	3	6	6	4	3	4	5	5	4	5	3	5	5	6	4	4	4	5	3	5	3	3	5	5	4	4	3	3	5	4	3	3	5
TCTAGT	4	6	4	5	5	5	4	4	4	3	4	4	3	3	4	4	6	4	4	5	4	6	4	4	4	4	5	4	4	4	4	5	5	3	4	3	4	3	4	4	5	5	4	4	3	3	4	4	5
TCTGCC	6	4	3	5	4	6	4	5	4	5	3	4	5	4	3	5	5	5	6	5	5	4	5	5	4	5	4	5	5	5	5	4	3	4	4	4	4	5	3	6	5	4	4	5	5	4	3	3	6
TGGAAG	4	5	6	3	5	5	4	5	5	4	6	5	3	5	5	3	4	4	4	3	5	4	4	5	4	5	3	6	4	6	3	4	5	5	4	5	5	3	4	4	5	3	5	3	4	5	5	4	6
TGGTCC	6	5	4	4	4	4	5	5	5	6	4	4	5	6	4	4	4	4	4	5	5	3	4	5	4	5	3	5	6	4	5	5	3	5	5	5	5	4	6	5	3	4	4	4	6	5	4	5	5
TTATGC	6	4	3	5	5	5	4	4	4	6	5	5	5	4	4	3	5	5	4	4	5	5	4	4	3	3	4	4	5	3	4	5	4	3	5	4	6	5	5	5	4	5	5	5	3	5	3	4	6
TTGATT	6	6	6	4	4	4	5	5	3	4	5	6	4	4	5	5	5	4	3	4	5	4	5	3	4	3	4	3	5	4	3	5	5	5	5	5	3	5	4	3	4	5	5	5	4	4	5	4	4
[truncated: 25 more columns]

## Sheet: SuppFig5-Qiu et al. 2003-Edit
Figure S5. Pairwise edit distance comparisons between 24 sequence tags described in Qiu et al. 2003. The minimum expected edit distance of the set is three. The minimum observed edit distance of the set is three.
	ATACGC	ACTGGC	CACAGC	TAACCC	CAGGCG	AGGTAC	TGAGCG	GACCAC	AATCGG	CTAAGG	GAAGAG	AGTGAG	GTGGAC	GTCACC	CGTCCA	GATGCC	AAGACC	GCCTCA	CTAGCC	TACGGA
ACTGGC	3
CACAGC	3	3
TAACCC	3	5	4
CAGGCG	4	3	3	4
AGGTAC	4	4	5	5	4
TGAGCG	4	4	4	3	3	5
GACCAC	4	4	3	3	5	4	4
AATCGG	3	3	4	4	4	5	4	4
CTAAGG	3	4	3	4	3	6	3	6	4
GAAGAG	5	5	4	4	3	4	3	3	4	3
AGTGAG	4	3	5	6	3	3	3	5	3	4	3
GTGGAC	4	3	5	5	4	3	4	3	5	5	3	3
GTCACC	3	5	3	3	5	4	4	3	5	4	5	4	3
CGTCCA	5	5	5	4	4	4	4	3	4	5	5	4	4	3
GATGCC	3	3	4	3	3	4	3	3	4	5	3	4	3	3	4
AAGACC	3	4	3	3	3	3	4	4	4	5	3	4	4	3	4	3
GCCTCA	5	5	5	5	5	5	5	3	5	5	5	5	5	3	3	4	5
CTAGCC	3	3	3	3	3	5	3	4	5	3	4	5	3	3	4	3	3	5
TACGGA	3	3	3	4	4	4	4	4	3	3	4	4	4	5	5	4	5	4	4
GCAGGA	4	3	4	5	3	4	4	4	5	4	3	4	3	4	5	4	5	3	4	3

## Sheet: SuppFig6-Roche - MID-Edit
Figure S6: Pairwise edit distance comparisons between 132 sequence tags provided as part of the Roche-454, Inc. multiplex identification (MID) tag set. The minimum expected edit distance of the set is four. The minimum observed edit distance of the set is four.
		MID-1	MID-2	MID-3	MID-4	MID-5	MID-6	MID-7	MID-8	MID-10	MID-11	MID-13	MID-14	MID-15	MID-16	MID-17	MID-18	MID-19	MID-20	MID-21	MID-22	MID-23	MID-24	MID-25	MID-26	MID-27	MID-28	MID-29	MID-30	MID-31	MID-32	MID-33	MID-34	MID-35	MID-36	MID-37	MID-38	MID-39	MID-40	MID-41	MID-42	MID-43	MID-44	MID-45	MID-46	MID-47	MID-48	MID-49	MID-50
		ACGAGTGCGT	ACGCTCGACA	AGACGCACTC	AGCACTGTAG	ATCAGACACG	ATATCGCGAG	CGTGTCTCTA	CTCGCGTGTC	TCTCTATGCG	TGATACGTCT	CATAGTAGTG	CGAGAGATAC	ATACGACGTA	TCACGTACTA	CGTCTAGTAC	TCTACGTAGC	TGTACTACTC	ACGACTACAG	CGTAGACTAG	TACGAGTATG	TACTCTCGTG	TAGAGACGAG	TCGTCGCTCG	ACATACGCGT	ACGCGAGTAT	ACTACTATGT	ACTGTACAGT	AGACTATACT	AGCGTCGTCT	AGTACGCTAT	ATAGAGTACT	CACGCTACGT	CAGTAGACGT	CGACGTGACT	TACACACACT	TACACGTGAT	TACAGATCGT	TACGCTGTCT	TAGTGTAGAT	TCGATCACGT	TCGCACTAGT	TCTAGCGACT	TCTATACTAT	TGACGTATGT	TGTGAGTAGT	ACAGTATATA	ACGCGATCGA	ACTAGCAGTA
MID-2	ACGCTCGACA	6
MID-3	AGACGCACTC	6	6
MID-4	AGCACTGTAG	6	6	6
MID-5	ATCAGACACG	6	6	6	6
MID-6	ATATCGCGAG	6	6	6	6	6
MID-7	CGTGTCTCTA	6	6	6	6	8	6
MID-8	CTCGCGTGTC	6	6	6	6	7	6	6
MID-10	TCTCTATGCG	6	6	8	6	6	6	7	6
MID-11	TGATACGTCT	6	6	6	6	6	7	6	7	6
MID-13	CATAGTAGTG	6	8	6	6	6	6	6	6	6	6
MID-14	CGAGAGATAC	6	6	6	6	6	7	6	6	8	6	6
MID-15	ATACGACGTA	6	6	4	5	5	4	7	6	7	5	5	6
MID-16	TCACGTACTA	6	6	4	6	6	7	5	5	6	5	5	7	4
MID-17	CGTCTAGTAC	7	5	6	5	6	7	5	5	5	6	5	4	6	6
MID-18	TCTACGTAGC	6	7	6	5	7	6	8	5	4	5	5	6	5	4	4
MID-19	TGTACTACTC	7	7	4	6	7	8	5	7	5	4	5	7	5	4	4	4
MID-20	ACGACTACAG	4	4	5	4	4	6	7	8	6	7	6	6	6	5	5	6	5
MID-21	CGTAGACTAG	7	5	6	5	5	6	5	7	7	6	4	4	5	6	4	6	5	5
MID-22	TACGAGTATG	4	7	6	6	6	5	7	5	6	6	4	6	4	5	6	5	6	4	5
MID-23	TACTCTCGTG	6	5	6	5	7	4	6	5	4	6	5	9	5	6	6	5	6	6	7	5
MID-24	TAGAGACGAG	6	7	6	5	5	4	8	7	6	5	5	5	5	6	8	6	7	5	4	5	5
MID-25	TCGTCGCTCG	6	5	6	7	6	5	5	5	4	5	6	7	6	6	6	5	5	6	4	6	5	6
MID-26	ACATACGCGT	4	6	6	7	4	4	7	6	5	4	5	8	4	7	7	5	7	5	7	7	5	5	6
MID-27	ACGCGAGTAT	4	5	6	5	7	6	6	5	7	6	6	4	4	5	4	7	7	5	5	4	6	6	6	6
MID-28	ACTACTATGT	4	7	7	5	6	7	7	6	4	6	5	7	4	6	6	4	5	4	6	4	5	7	7	4	5
MID-29	ACTGTACAGT	4	6	7	6	5	6	6	7	6	6	6	7	6	6	6	6	5	4	6	6	5	6	7	4	6	4
MID-30	AGACTATACT	6	5	4	4	6	7	6	8	5	5	6	5	6	5	4	7	5	4	6	6	6	7	7	5	5	4	5
MID-31	AGCGTCGTCT	5	4	5	5	6	7	4	5	7	4	6	7	5	6	6	7	7	6	6	6	6	6	4	5	4	6	6	5
MID-32	AGTACGCTAT	6	6	4	4	7	4	5	6	7	4	6	6	4	6	6	5	5	6	4	5	6	6	5	4	5	4	6	4	5
MID-33	ATAGAGTACT	4	7	5	6	4	6	7	6	7	5	5	4	4	5	5	6	5	5	5	4	7	5	7	6	4	6	6	4	5	5
MID-34	CACGCTACGT	4	5	5	6	6	6	6	5	6	6	5	6	5	4	6	5	6	4	6	5	4	6	5	5	5	4	4	5	6	5	6
MID-35	CAGTAGACGT	4	6	6	7	5	7	6	7	6	6	4	5	4	6	6	6	6	6	4	6	6	4	6	4	7	5	4	5	6	5	5	4
MID-36	CGACGTGACT	4	5	4	6	7	6	5	5	7	5	6	5	6	4	5	5	5	5	6	6	7	7	6	6	5	6	6	4	4	5	5	4	4
MID-37	TACACACACT	7	5	4	7	4	7	8	8	6	5	7	6	6	4	8	6	5	5	7	6	5	5	6	4	6	6	5	4	7	6	5	5	6	6
MID-38	TACACGTGAT	5	6	6	5	7	5	8	5	6	4	6	7	4	4	7	5	6	6	6	4	5	5	7	5	4	5	6	6	6	5	5	6	6	4	4
MID-39	TACAGATCGT	4	6	7	7	5	7	8	7	6	5	5	6	4	6	8	6	7	6	6	4	4	4	6	4	6	5	5	6	6	6	5	4	4	6	4	4
MID-40	TACGCTGTCT	5	4	5	5	8	6	6	4	5	4	7	8	5	5	6	6	6	6	7	4	4	7	5	6	4	5	6	5	4	5	5	4	6	4	4	4	5
MID-41	TAGTGTAGAT	6	7	7	6	8	6	6	6	6	6	5	6	7	6	5	6	6	6	6	5	5	4	6	7	5	6	4	5	5	6	4	6	5	6	6	4	5	5
MID-42	TCGATCACGT	4	5	6	7	4	6	6	6	6	4	7	7	6	6	6	6	6	5	7	5	5	5	5	4	7	5	5	6	6	7	5	4	5	5	5	6	4	5	6
MID-43	TCGCACTAGT	5	5	6	5	6	6	7	5	6	6	5	7	6	5	5	4	4	5	5	5	5	5	4	5	4	4	4	6	7	6	5	4	6	5	4	5	5	5	5	4
MID-44	TCTAGCGACT	5	5	6	8	5	5	7	5	6	4	6	6	5	4	5	4	4	6	6	6	6	5	5	5	6	5	6	6	6	5	4	5	5	4	5	5	6	5	6	4	5
MID-45	TCTATACTAT	6	7	8	7	6	6	6	7	5	4	5	6	6	4	5	5	4	5	4	6	6	5	6	5	5	4	4	5	7	4	5	6	6	7	5	5	6	6	5	4	4	4
MID-46	TGACGTATGT	5	8	5	5	7	7	6	6	5	5	6	6	5	4	6	4	5	6	6	4	5	6	6	6	6	4	5	4	5	5	5	4	6	4	6	5	4	4	5	5	4	6	6
MID-47	TGTGAGTAGT	5	8	7	6	7	6	6	6	7	5	4	5	6	6	5	4	4	7	4	4	7	5	6	7	4	5	5	6	6	5	4	6	5	6	7	6	5	6	4	5	4	5	5	4
MID-48	ACAGTATATA	5	5	6	5	5	7	5	7	6	7	5	5	5	4	5	7	6	5	5	5	7	7	7	6	5	4	4	4	6	6	5	6	5	7	6	5	5	6	5	7	6	7	5	5	7
MID-49	ACGCGATCGA	4	4	6	6	6	6	5	6	5	7	8	6	4	5	7	6	8	5	6	5	6	5	4	6	4	5	6	6	5	7	7	4	6	6	7	5	4	5	6	6	5	6	7	6	6	5
MID-50	ACTAGCAGTA	5	6	5	5	6	6	6	5	7	7	4	5	4	5	6	5	6	6	5	5	5	7	7	4	4	4	4	6	7	5	4	6	5	7	6	6	6	6	6	5	6	4	5	7	5	4	6
MID-51	AGCTCACGTA	6	4	4	4	6	5	5	6	6	5	7	7	4	6	5	5	6	6	6	7	4	6	7	5	5	5	5	5	5	4	7	4	5	6	6	6	6	6	7	4	6	7	6	6	6	6	5	4
MID-52	AGTATACATA	6	6	5	6	5	6	5	9	7	5	6	5	4	6	5	6	4	5	4	7	6	6	8	6	7	5	4	4	6	4	6	6	4	7	6	6	7	7	4	6	7	7	4	7	6	4	6	4
MID-53	AGTCGAGAGA	6	5	6	6	5	4	7	6	6	8	6	5	5	7	5	6	7	5	5	6	6	5	6	7	5	6	5	5	6	5	5	7	5	5	7	6	7	8	5	6	6	6	7	6	4	6	4	5
MID-54	AGTGCTACGA	5	5	5	6	6	6	4	8	6	6	7	6	4	6	5	6	4	5	5	6	6	5	5	6	6	4	4	6	6	5	6	4	5	7	8	7	6	7	4	6	6	6	6	6	5	6	4	5
MID-55	CGATCGTATA	6	4	5	6	7	6	4	5	7	4	4	4	6	4	4	5	6	5	5	5	7	7	6	6	5	6	7	5	5	5	6	6	7	4	8	6	6	6	6	5	6	6	5	4	6	5	6	6
MID-56	CGCAGTACGA	4	5	6	5	5	7	5	7	6	6	5	5	6	4	4	6	5	5	4	5	7	5	6	6	5	6	5	6	6	6	6	4	4	5	7	6	5	6	6	5	4	7	6	5	5	5	4	6
MID-57	CGCGTATACA	7	4	6	6	6	8	4	5	5	7	7	4	7	5	4	6	6	5	5	6	8	7	6	7	5	7	6	4	5	7	6	5	5	4	6	7	7	6	6	6	6	7	5	5	6	4	4	7
MID-58	CGTACAGTCA	7	5	6	5	6	7	5	6	7	4	5	5	5	6	4	6	4	6	4	6	7	6	5	6	6	6	4	6	5	5	5	6	5	5	6	5	5	6	7	6	5	6	6	7	6	5	6	4
MID-59	CGTACTCAGA	6	5	6	5	7	6	4	7	7	6	5	6	6	6	4	5	5	4	4	7	6	7	5	5	7	5	5	6	7	5	8	6	5	5	6	6	7	7	6	5	4	7	6	6	5	5	5	5
MID-60	CTACGCTCTA	7	5	4	6	7	6	4	4	7	5	6	6	4	4	7	5	6	6	5	5	4	7	5	5	6	5	7	6	6	4	6	4	7	5	6	6	5	4	7	7	5	5	5	6	8	6	5	4
MID-61	CTATAGCGTA	5	7	7	7	7	4	5	5	5	5	4	5	4	6	5	5	6	7	5	6	5	5	7	4	7	5	5	6	7	6	5	6	4	7	7	5	5	6	7	5	7	5	4	7	6	6	6	4
MID-62	TACGTCATCA	7	4	5	7	6	7	5	6	5	6	7	7	4	4	6	5	6	5	7	5	5	6	4	7	6	6	6	6	4	6	6	6	7	5	5	5	5	4	6	5	6	7	6	4	7	5	4	6
MID-63	TAGTCGCATA	6	5	4	6	6	5	5	6	7	6	6	6	5	5	6	6	6	7	6	5	4	6	4	6	6	7	7	6	6	4	6	7	5	7	5	5	6	6	4	5	6	6	7	5	6	5	6	4
MID-64	TATATATACA	8	6	7	7	5	6	6	8	4	5	6	5	6	5	5	5	5	6	6	6	7	6	7	6	8	6	6	4	8	7	4	7	6	7	4	6	5	6	5	6	7	5	4	6	6	4	7	7
MID-65	TATGCTAGTA	7	5	6	6	7	5	5	6	5	6	4	7	4	4	4	5	4	6	6	5	4	6	6	6	4	5	6	6	6	5	6	4	7	7	6	6	5	4	4	6	5	5	5	5	4	6	6	4
MID-66	TCACGCGAGA	6	4	6	6	6	4	7	5	6	6	7	6	5	4	7	4	8	6	7	5	5	5	5	5	4	7	7	7	7	6	7	4	6	5	5	4	6	5	5	6	4	4	6	5	6	6	4	5
MID-67	TCGATAGTGA	5	5	8	7	6	6	7	6	5	4	5	5	5	5	5	5	6	5	6	4	5	5	5	5	5	5	6	7	6	7	6	6	6	5	7	5	5	5	5	4	4	5	4	5	5	5	5	5
MID-68	TCGCTGCGTA	4	4	7	6	7	6	5	4	5	5	7	6	5	4	5	5	6	6	6	6	4	6	5	6	4	6	6	8	6	6	7	4	6	6	7	6	5	4	6	4	5	6	5	6	5	6	5	5
MID-69	TCTGACGTCA	6	5	7	7	5	7	5	6	5	4	7	7	4	4	6	4	6	5	6	6	5	6	4	6	6	6	5	7	5	6	6	7	6	5	6	5	5	5	7	5	6	4	5	6	5	6	5	5
MID-70	TGAGTCAGTA	5	7	5	6	6	7	4	6	7	5	5	5	5	4	5	6	5	6	6	5	5	5	6	7	6	7	5	6	5	6	5	7	6	5	6	6	5	6	5	4	5	6	6	4	4	5	6	4
MID-71	TGTAGTGTGA	5	8	8	5	8	6	5	6	6	5	4	6	6	6	6	5	5	8	5	5	6	6	6	7	7	5	6	7	6	6	6	8	6	6	8	5	6	6	4	7	6	5	6	4	4	6	7	5
MID-72	TGTCACACGA	8	6	5	6	5	6	5	7	5	6	8	7	5	5	6	6	4	6	5	7	6	5	4	6	8	6	5	6	8	5	8	6	5	7	5	5	5	8	6	5	5	6	5	5	5	7	6	6
MID-73	TGTCGTCGCA	7	5	6	7	6	5	4	6	5	5	6	8	5	5	5	4	5	7	6	7	5	6	4	7	7	8	7	7	4	6	7	7	6	5	7	6	6	6	5	6	7	5	7	5	5	8	5	6
MID-74	ACACATACGC	5	5	4	5	4	7	8	7	5	6	6	6	5	4	7	4	5	4	7	6	6	6	7	4	6	4	5	4	6	7	5	4	5	6	4	6	4	7	8	5	5	7	6	5	7	5	4	6
MID-75	ACAGTCGTGC	4	5	6	5	5	5	7	5	6	6	4	6	5	6	5	5	7	6	7	5	4	5	5	4	6	5	5	6	4	6	5	6	5	5	7	5	4	6	6	6	7	6	7	6	7	5	5	5
MID-76	ACATGACGAC	5	5	5	6	4	4	7	7	7	5	6	6	4	5	6	5	7	5	5	7	6	4	7	4	5	6	5	6	6	6	5	6	5	6	5	5	5	7	6	5	7	5	5	7	7	6	4	6
MID-77	ACGACAGCTC	4	6	4	6	5	7	7	6	7	6	7	4	5	6	5	6	5	4	6	6	7	7	4	5	5	5	4	5	5	5	6	6	7	5	5	6	6	5	7	5	5	6	6	7	7	6	5	4
MID-78	ACGTCTCATC	5	4	4	7	7	6	5	6	5	7	7	6	7	6	4	6	5	4	7	5	4	8	4	5	6	5	5	5	4	5	7	5	7	6	6	6	6	5	6	5	6	7	6	6	8	4	5	5
MID-79	ACTCATCTAC	7	4	5	5	5	6	6	6	5	7	8	6	6	5	5	5	6	5	6	7	5	7	6	7	5	5	6	5	5	5	6	6	8	7	5	6	6	6	7	6	5	5	4	7	7	5	4	5
MID-80	ACTCGCGCAC	5	4	4	6	5	4	7	4	6	8	8	6	5	6	5	5	7	6	7	7	5	7	5	5	4	7	5	7	6	5	5	6	7	6	6	5	7	7	7	6	6	4	7	8	7	7	5	4
MID-81	AGAGCGTCAC	5	5	4	5	6	5	6	5	9	5	7	4	5	6	6	6	6	5	6	7	8	5	7	6	5	8	7	5	4	5	4	7	6	4	6	5	6	6	6	7	8	6	8	6	6	6	5	5
MID-82	AGCGACTAGC	5	5	4	4	5	6	6	6	6	7	7	5	5	6	5	4	5	4	4	5	7	4	6	6	4	4	5	5	5	5	5	5	6	6	7	7	6	6	6	6	4	6	7	6	4	6	4	6
MID-83	AGTAGTGATC	5	7	5	5	6	6	6	6	7	6	5	4	6	7	5	5	4	7	6	5	7	6	6	6	5	5	6	5	5	4	5	7	5	5	8	5	6	6	4	8	7	5	7	6	5	5	6	5
MID-84	AGTGACACAC	7	6	4	6	4	6	5	8	8	6	8	4	6	7	6	6	4	4	5	8	8	5	7	6	6	6	5	5	6	4	6	7	5	7	5	7	7	8	5	6	7	7	6	7	6	6	6	6
MID-85	AGTGTATGTC	5	7	5	6	8	7	4	5	5	5	5	6	6	7	4	6	5	7	7	5	6	6	7	7	6	4	4	5	4	6	6	6	5	7	9	8	6	6	4	7	7	7	6	4	5	4	6	5
MID-86	ATAGATAGAC	7	5	6	7	5	5	8	6	7	5	4	4	5	7	6	5	6	5	5	6	7	4	7	7	6	6	6	5	6	6	4	7	5	6	5	6	5	6	4	6	6	6	6	7	6	4	5	5
MID-87	ATATAGTCGC	5	7	6	6	5	4	7	6	6	5	4	6	5	7	5	4	5	7	6	6	6	5	6	4	7	5	6	6	6	7	4	7	5	7	6	6	4	7	6	7	7	5	6	7	5	6	6	6
MID-88	ATCTACTGAC	6	5	6	4	5	5	7	5	5	6	6	7	5	6	4	4	5	5	6	7	6	6	7	6	6	5	5	5	6	6	5	6	7	5	6	5	7	6	6	6	6	4	5	7	7	7	6	5
MID-89	CACGTAGATC	6	5	5	6	7	7	6	5	7	7	4	4	6	4	5	4	6	6	5	4	6	7	5	6	5	6	5	6	5	6	6	4	4	4	6	4	5	5	4	7	6	7	7	5	7	4	5	5
MID-90	CACGTGTCGC	4	5	6	5	7	7	5	4	6	7	5	6	7	5	6	5	7	6	7	5	5	6	5	6	6	6	5	7	5	7	7	4	4	4	7	6	5	4	5	6	7	7	8	5	6	6	4	7
MID-91	CATACTCTAC	8	5	6	5	6	5	4	6	6	5	5	5	5	6	4	5	4	6	4	7	6	6	6	5	7	5	7	4	7	4	5	5	6	6	5	6	7	6	7	7	7	6	5	7	8	5	7	6
MID-92	CGACACTATC	7	6	4	5	7	7	5	5	6	5	5	4	6	6	4	5	4	5	4	5	6	6	6	7	5	5	7	5	7	4	6	5	6	5	6	5	6	5	8	5	4	7	4	5	6	6	6	6
MID-93	CGAGACGCGC	4	7	5	7	5	6	5	5	6	5	6	4	6	8	6	6	6	6	4	7	7	4	6	4	6	8	7	7	6	6	6	6	5	5	6	6	6	7	8	5	6	6	7	7	6	8	5	7
MID-94	CGTATGCGAC	5	5	6	6	7	4	5	6	5	5	6	5	6	7	4	6	5	6	4	7	7	6	6	5	7	7	7	7	6	4	6	6	5	4	7	6	7	6	6	6	7	4	5	7	7	6	5	6
MID-95	CGTCGATCTC	7	5	4	7	6	8	4	4	6	5	6	5	6	6	4	6	4	6	4	6	7	8	4	7	5	6	7	5	4	5	6	6	5	5	8	8	6	6	7	5	7	6	6	5	6	6	4	7
MID-96	CTACGACTGC	5	6	4	7	6	6	7	4	5	6	5	5	4	5	5	4	4	5	4	5	6	6	6	5	6	4	6	6	7	5	5	5	5	5	6	5	5	4	7	6	5	4	5	5	6	8	6	6
MID-97	CTAGTCACTC	6	7	4	7	5	6	4	5	7	6	4	5	6	5	5	5	4	6	5	6	5	6	4	7	7	6	5	6	6	6	5	6	5	4	5	7	7	6	6	5	6	4	5	7	6	6	8	4
MID-98	CTCTACGCTC	7	6	6	7	6	6	5	4	4	5	6	6	5	5	4	4	4	7	6	7	5	8	4	5	7	5	5	6	6	5	7	5	6	7	6	7	7	6	7	6	7	4	5	7	8	7	7	6
MID-99	CTGTACATAC	7	7	7	6	6	7	5	6	6	5	6	4	6	5	4	4	4	6	4	7	7	7	7	7	7	6	4	5	7	5	6	6	5	5	5	6	7	8	6	7	6	6	4	6	6	4	8	6
MID-100	TAGACTGCAC	5	6	4	4	6	6	7	6	7	6	7	6	5	6	5	5	4	4	5	6	6	5	5	6	7	7	7	4	7	5	5	6	7	5	4	4	6	5	5	5	6	6	6	6	7	7	8	6
MID-101	TAGCGCGCGC	5	5	4	6	6	4	7	5	6	7	7	7	6	6	7	6	6	7	7	6	5	4	4	6	6	8	7	8	5	6	6	5	6	7	5	5	5	5	6	5	5	6	9	6	6	9	5	7
MID-102	TAGCTCTATC	8	5	5	5	7	6	6	5	4	6	7	6	7	6	5	5	4	7	6	5	4	6	5	8	6	5	7	5	5	5	6	6	7	8	6	5	6	4	5	6	4	7	5	6	7	5	6	6
MID-103	TATAGACATC	7	7	5	8	4	6	7	7	7	5	5	5	4	6	6	5	4	7	5	5	6	4	6	6	7	7	6	6	6	6	5	7	4	7	4	5	4	6	5	6	7	5	4	7	6	5	7	5
MID-104	TATGATACGC	5	6	6	7	5	6	7	8	5	4	6	6	6	5	7	5	4	5	6	4	6	4	6	5	8	6	5	6	7	6	5	4	5	7	5	7	4	6	5	4	6	6	5	5	4	7	6	8
MID-105	TCACTCATAC	7	5	5	5	6	7	6	6	4	6	7	5	6	4	5	5	5	5	7	6	5	7	6	7	6	5	7	4	7	6	7	5	6	7	4	5	6	6	6	5	5	6	5	5	7	5	7	6
MID-106	TCATCGAGTC	6	6	5	7	6	5	7	4	5	5	4	6	5	4	4	4	5	7	6	5	5	6	4	4	5	6	6	7	6	8	5	6	5	6	6	5	6	5	6	4	5	4	5	5	6	6	6	5
MID-107	TCGAGCTCTC	5	6	4	7	6	8	4	4	6	5	7	5	6	5	6	5	4	5	6	4	6	6	4	7	6	6	7	6	6	6	5	6	7	6	6	7	5	5	7	4	5	4	5	6	6	6	5	5
MID-108	TCGCAGACAC	6	4	6	7	4	7	7	5	6	6	7	4	7	5	5	6	5	5	4	6	8	4	5	7	5	8	7	7	7	7	6	6	5	6	4	6	5	5	6	5	5	5	5	7	7	6	5	6
MID-109	TCTGTCTCGC	6	5	7	7	5	6	4	6	4	7	7	8	8	6	5	4	5	6	6	6	5	7	4	6	8	6	5	8	6	8	8	6	6	7	7	8	5	6	6	4	5	6	5	6	5	6	6	7
MID-110	TGAGTGACGC	4	7	5	6	5	7	6	6	6	4	7	4	6	5	7	5	4	6	7	5	6	4	6	6	8	7	6	6	6	6	5	6	4	4	6	6	5	6	5	4	6	5	7	4	5	7	6	8
MID-111	TGATGTGTAC	6	7	6	5	7	6	6	5	6	4	6	4	6	5	4	5	6	7	6	5	6	6	7	7	6	7	7	5	6	6	5	7	7	4	7	5	7	5	5	6	7	6	6	4	4	6	8	7
MID-112	TGCTATAGAC	8	6	7	6	6	7	7	6	5	5	6	5	7	7	4	4	4	6	6	6	5	6	7	7	7	6	6	5	6	7	6	7	6	6	5	6	6	6	4	6	5	4	4	5	5	6	5	6
MID-113	TGCTCGCTAC	8	5	5	5	7	5	5	5	5	5	8	5	6	5	4	4	5	7	5	6	5	7	4	7	6	7	7	6	5	4	7	5	8	6	5	5	7	6	7	6	5	4	5	6	6	8	7	6
MID-114	ACGTGCAGCG	4	5	6	6	5	5	6	7	5	7	5	7	7	7	6	6	7	5	6	5	6	6	4	4	5	6	4	7	5	6	6	6	6	5	6	7	6	6	5	5	6	6	8	7	6	6	4	4
MID-115	ACTCACAGAG	6	5	6	4	4	4	8	6	5	8	6	7	6	7	6	5	7	4	6	6	4	5	6	5	5	5	4	7	8	6	6	6	7	7	5	6	6	8	6	6	5	6	6	7	7	6	5	4
MID-116	AGACTCAGCG	5	5	4	5	5	5	7	8	5	6	5	7	6	7	6	6	6	4	6	6	5	5	6	5	7	6	6	4	5	6	6	6	6	5	5	7	6	6	6	5	6	7	8	6	7	7	6	6
MID-117	AGAGAGTGTG	4	8	6	4	6	5	6	5	7	5	4	5	5	7	7	8	7	6	5	4	6	4	8	5	4	6	6	6	5	6	4	7	5	6	7	6	5	7	6	7	7	7	7	5	4	5	6	6
MID-118	AGCTATCGCG	5	5	6	5	5	4	6	7	4	5	6	7	6	8	6	6	6	5	6	7	4	5	6	4	7	6	6	4	4	5	7	5	6	7	7	7	6	6	6	5	7	5	6	6	7	7	4	5
MID-119	AGTCTGACTG	6	5	4	5	4	6	5	7	6	6	6	7	5	6	5	6	4	4	4	6	5	6	5	7	6	5	5	4	5	5	6	6	5	4	6	6	7	5	5	7	6	6	6	6	6	6	6	6
MID-120	AGTGAGCTCG	5	7	5	6	4	6	5	7	7	6	6	5	7	7	6	7	6	5	4	6	7	5	4	6	5	6	6	7	5	4	5	7	5	6	7	8	6	7	5	6	7	6	7	7	4	7	5	6
MID-121	ATAGCTCTCG	6	5	4	5	4	4	6	5	5	6	5	7	6	7	8	7	5	6	5	6	4	6	4	6	7	5	7	5	5	5	5	6	7	7	6	7	6	4	6	5	5	6	7	7	8	6	5	5
MID-122	ATCACGTGCG	4	6	6	4	4	4	8	4	4	5	5	8	5	4	6	4	7	5	7	6	5	7	5	5	6	6	6	6	5	6	5	5	6	5	6	4	6	5	7	6	7	6	8	5	7	7	5	7
MID-123	ATCGTAGCAG	6	5	6	5	4	4	7	7	5	7	4	7	5	6	5	5	7	4	4	5	6	5	4	5	5	6	4	7	5	5	5	6	6	7	7	6	7	7	5	5	5	5	6	7	5	6	6	4
MID-124	ATCGTCTGTG	5	6	6	4	5	5	5	4	5	6	4	8	4	7	5	6	6	5	6	5	4	6	4	6	6	5	5	7	4	5	6	6	6	7	8	7	6	5	6	5	5	8	6	5	6	5	6	5
MID-125	ATGTACGATG	6	5	5	5	5	4	6	7	6	5	4	7	5	6	7	5	4	5	5	5	5	5	5	5	6	4	4	6	6	4	6	5	5	7	7	6	6	7	4	6	6	5	5	4	6	5	5	6
MID-126	ATGTGTCTAG	6	6	7	5	5	4	4	6	6	6	6	7	5	6	6	6	6	5	4	5	6	5	5	7	5	6	5	6	5	5	5	7	7	6	9	7	8	5	5	7	6	7	5	6	4	5	5	7
MID-127	CACACGATAG	7	5	6	4	5	5	7	6	6	6	5	4	5	5	6	5	7	4	4	5	6	5	6	6	4	5	6	5	7	5	6	5	6	6	5	4	4	6	7	6	5	7	6	6	7	5	4	6
MID-128	CACTCGCACG	6	4	5	5	4	5	7	6	6	7	5	7	6	6	5	6	7	5	6	5	4	7	4	6	7	6	5	6	6	6	7	4	4	5	4	6	6	6	7	6	6	5	8	7	8	7	5	5
MID-129	CAGACGTCTG	6	7	4	5	5	6	5	5	7	4	4	6	5	5	7	6	6	5	5	4	5	5	5	5	6	6	7	5	5	5	5	6	5	4	6	5	6	5	7	7	7	5	6	4	7	6	6	7
MID-130	CAGTACTGCG	5	7	6	4	5	6	6	7	4	6	4	6	6	5	6	6	5	5	5	6	5	5	5	4	8	5	5	6	7	5	6	5	4	5	7	6	6	6	6	7	6	7	6	6	7	5	7	6
MID-131	CGACAGCGAG	5	6	6	5	6	4	7	6	7	6	5	4	6	7	5	6	7	4	4	6	6	4	5	6	6	7	7	7	7	5	7	5	6	4	7	5	6	7	7	5	5	6	6	6	6	7	5	6
MID-132	CGATCTGTCG	5	5	6	4	6	6	5	5	5	4	5	6	7	7	4	6	6	5	6	6	5	7	4	6	7	6	6	5	5	7	7	6	6	4	8	8	6	5	7	5	6	6	6	6	6	7	6	6
MID-133	CGCGTGCTAG	5	6	6	4	7	6	4	5	6	7	6	4	7	4	5	6	7	5	4	5	7	6	4	7	4	6	6	7	5	5	7	5	7	4	8	6	7	6	6	7	5	7	6	6	5	7	5	7
MID-134	CGCTCGAGTG	6	4	6	5	7	5	6	4	5	6	4	6	6	6	4	6	6	6	4	6	4	7	5	6	5	6	6	6	5	7	7	5	5	5	7	6	7	6	7	5	4	6	7	6	5	7	6	5
MID-135	CGTGATGACG	5	6	7	6	6	7	5	6	5	6	6	5	6	7	5	7	6	6	4	6	8	5	5	6	6	7	6	6	6	7	6	5	4	4	8	7	7	6	6	5	7	6	7	6	5	6	5	8
MID-136	CTATGTACAG	6	6	6	6	5	5	6	7	5	7	4	6	6	5	5	5	6	4	4	6	6	5	7	7	8	6	4	6	8	7	5	5	5	5	6	7	7	7	4	6	6	6	5	6	6	6	8	6
MID-137	CTCGATATAG	7	7	8	5	5	7	6	5	5	6	5	4	5	5	5	5	7	4	4	4	7	5	6	7	5	6	5	6	7	6	6	5	6	7	7	7	6	6	6	5	5	7	4	6	6	5	5	6
MID-138	CTCGCACGCG	6	5	5	6	4	5	7	4	4	6	5	7	5	6	7	5	7	6	5	7	5	5	4	5	7	7	6	8	6	7	7	4	6	7	5	6	7	6	8	5	4	6	7	7	8	8	6	5
MID-139	CTGCGTCACG	6	5	6	7	4	6	5	4	6	7	6	6	6	6	6	5	7	6	6	6	6	6	5	7	7	6	6	7	5	7	5	5	6	4	6	7	7	6	7	4	6	5	8	5	6	7	6	6
MID-140	CTGTGCGTCG	5	6	7	6	6	5	5	4	5	4	5	6	6	7	6	5	6	7	5	6	5	6	4	6	6	7	5	8	5	6	6	6	5	6	8	7	7	5	7	7	7	5	6	6	4	7	6	6
MID-141	TAGCATACTG	7	7	5	5	5	7	7	6	5	5	5	6	6	4	7	6	4	5	5	4	5	4	6	5	6	6	6	4	6	6	4	5	5	6	4	6	5	5	5	5	4	5	5	5	6	5	6	6
MID-142	TATACATGTG	7	8	7	5	6	5	7	6	4	4	4	7	4	6	7	5	5	7	6	5	4	4	7	5	7	4	5	6	7	6	6	6	5	7	5	4	4	5	6	5	6	6	5	5	6	6	7	5
MID-143	TATCACTCAG	7	6	6	4	4	4	6	7	5	5	6	8	6	6	6	5	5	4	5	5	4	5	4	6	7	6	6	7	7	6	7	6	7	8	4	4	5	6	7	6	4	7	5	7	5	7	7	6
MID-144	TATCTGATAG	7	6	8	5	4	4	6	7	4	6	6	6	6	6	5	5	6	6	5	4	4	5	5	8	6	6	5	6	7	6	6	6	7	7	6	5	4	5	5	6	6	7	5	6	5	6	6	6
MID-145	TCGTGACATG	6	5	7	7	4	7	5	6	6	6	6	5	6	5	7	5	5	5	4	4	5	4	4	6	5	5	5	8	6	7	6	6	5	5	6	6	6	5	4	4	5	5	5	6	5	5	6	6
MID-146	TCTGATCGAG	6	5	8	7	5	5	6	7	4	6	6	7	6	6	7	4	7	5	5	6	4	4	5	6	7	6	5	8	7	7	8	7	6	7	7	6	4	7	5	4	5	4	4	6	5	6	4	6
MID-147	TGACATCTCG	7	7	5	5	5	6	6	6	5	4	7	6	7	5	7	6	4	6	5	5	4	5	4	5	8	7	7	5	5	6	7	6	8	5	5	6	4	5	7	5	5	7	6	4	6	7	7	8
MID-148	TGAGCTAGAG	6	6	6	5	6	5	6	7	5	6	5	5	7	6	5	6	5	4	5	5	5	4	6	7	6	7	6	5	7	6	6	6	5	6	7	6	6	6	4	6	5	6	7	5	5	6	6	6
MID-149	TGATAGAGCG	6	6	7	7	5	5	8	8	5	4	4	5	6	7	6	5	6	6	5	6	6	4	5	5	8	8	6	5	7	7	5	8	5	6	6	6	4	7	6	5	7	5	7	6	5	7	7	6
MID-150	TGCGTGTGCG	4	7	7	5	7	7	6	4	4	6	6	6	7	6	6	6	7	6	7	4	5	6	4	6	6	7	6	6	4	8	6	6	7	5	7	5	6	4	5	6	7	6	7	4	5	7	6	8
MID-151	TGCTAGTCAG	6	5	7	5	5	6	7	6	5	4	6	6	6	6	4	4	5	5	4	4	5	5	5	7	5	6	5	6	5	6	7	7	6	7	6	5	5	5	6	5	5	5	5	6	4	7	6	5
MID-152	TGTATCACAG	8	6	6	6	6	4	5	8	6	6	6	7	7	7	6	5	4	5	4	7	6	5	5	7	9	7	5	6	7	5	7	8	6	7	5	7	7	8	5	4	6	5	4	6	6	6	7	6
MID-153	TGTGCGCGTG	5	7	6	6	7	4	5	5	6	5	6	7	5	7	6	6	5	8	6	5	4	5	4	5	6	7	6	8	6	5	7	6	6	7	7	6	6	6	6	5	6	5	7	5	4	8	7	6
[truncated: 102 more columns]

## Sheet: SuppFig7-Roche - RLMID-Edit
Figure S7. Pairwise edit distance comparisons between 132 sequence tags provided as part of the Roche-454, Inc. rapid library multiplex identification (RL-MID) tag set. The minimum expected edit distance of the set is four. The minimum observed edit distance of the set is four.
		RL1	RL2	RL3	RL4	RL5	RL6	RL7	RL8	RL9	RL10	RL11	RL12	RL13	RL14	RL15	RL16	RL17	RL18	RL19	RL20	RL21	RL22	RL23	RL24	RL25	RL26	RL27	RL28	RL29	RL30	RL31	RL32	RL33	RL34	RL35	RL36	RL37	RL38	RL39	RL40	RL41	RL42	RL43	RL44	RL45	RL46	RL47	RL48
		ACACGACGACT	ACACGTAGTAT	ACACTACTCGT	ACGACACGTAT	ACGAGTAGACT	ACGCGTCTAGT	ACGTACACACT	ACGTACTGTGT	ACGTAGATCGT	ACTACGTCTCT	ACTATACGAGT	ACTCGCGTCGT	AGACTCGACGT	AGTACGAGAGT	AGTACTACTAT	AGTAGACGTCT	AGTCGTACACT	AGTGTAGTAGT	ATAGTATACGT	CAGTACGTACT	CGACGACGCGT	CGACGAGTACT	CGATACTACGT	CGTACGTCGAT	CTACTCGTAGT	GTACAGTACGT	GTCGTACGTAT	GTGTACGACGT	ACACAGTGAGT	ACACTCATACT	ACAGACAGCGT	ACAGACTATAT	ACAGAGACTCT	ACAGCTCGTGT	ACAGTGTCGAT	ACGAGCGCGCT	ACGATGAGTGT	ACGCGAGAGAT	ACGCTCTCTCT	ACGTCGCTGAT	ACGTCTAGCAT	ACTAGTGATAT	ACTCACACTGT	ACTCACTAGCT	ACTCTATATAT	ACTGATCTCGT	ACTGCTGTACT	ACTGTAGCGCT
RL2	ACACGTAGTAT	4
RL3	ACACTACTCGT	4	4
RL4	ACGACACGTAT	4	4	5
RL5	ACGAGTAGACT	4	4	5	5
RL6	ACGCGTCTAGT	4	4	4	5	4
RL7	ACGTACACACT	4	6	5	4	4	6
RL8	ACGTACTGTGT	6	5	4	4	5	5	4
RL9	ACGTAGATCGT	6	5	4	5	4	5	4	4
RL10	ACTACGTCTCT	4	4	4	5	5	4	4	4	5
RL11	ACTATACGAGT	4	6	4	4	4	5	4	4	5	6
RL12	ACTCGCGTCGT	4	5	4	5	6	4	6	5	4	4	5
RL13	AGACTCGACGT	4	6	4	5	4	5	5	5	5	6	5	4
RL14	AGTACGAGAGT	4	5	6	6	5	6	4	4	4	5	4	5	4
RL15	AGTACTACTAT	5	4	4	4	6	6	4	4	6	4	4	7	5	4
RL16	AGTAGACGTCT	4	6	6	4	5	7	4	5	4	4	4	4	5	4	4
RL17	AGTCGTACACT	4	5	5	6	4	5	4	6	5	4	5	6	5	4	4	4
RL18	AGTGTAGTAGT	7	4	5	6	4	4	6	5	4	7	4	5	5	4	4	5	4
RL19	ATAGTATACGT	6	5	4	6	4	5	5	5	4	5	5	5	4	5	5	5	4	4
RL20	CAGTACGTACT	4	4	5	5	4	6	4	5	6	4	5	6	6	4	4	4	4	5	5
RL21	CGACGACGCGT	4	6	4	4	6	5	5	5	5	5	5	5	4	4	6	5	5	7	6	6
RL22	CGACGAGTACT	4	4	6	4	4	5	5	6	6	5	7	6	5	4	5	5	5	5	6	4	4
RL23	CGATACTACGT	6	7	4	5	5	5	5	4	5	7	4	7	4	5	4	6	6	5	4	4	4	4
RL24	CGTACGTCGAT	5	5	5	5	5	5	5	4	4	4	6	5	5	4	4	5	5	6	7	4	4	5	4
RL25	CTACTCGTAGT	6	5	5	4	6	5	6	4	6	5	4	4	4	5	5	6	6	5	5	4	5	4	5	4
RL26	GTACAGTACGT	6	6	5	6	6	7	5	5	5	6	6	6	5	4	5	5	5	4	4	4	6	4	4	4	4
RL27	GTCGTACGTAT	6	4	7	4	7	6	5	4	6	6	6	6	6	6	4	4	4	4	6	4	5	5	6	4	5	4
RL28	GTGTACGACGT	6	8	6	6	5	6	5	5	4	6	4	6	4	4	5	5	4	4	4	4	5	7	4	4	6	4	4
RL29	ACACAGTGAGT	4	4	4	4	4	4	6	4	5	5	4	5	5	4	6	7	6	5	6	6	6	5	6	6	5	4	7	7
RL30	ACACTCATACT	4	4	4	4	4	4	4	6	6	4	6	5	4	6	5	6	5	6	4	4	7	5	6	7	4	6	7	8	5
RL31	ACAGACAGCGT	4	5	4	4	5	6	5	4	4	6	4	5	5	5	7	5	6	6	4	6	4	6	5	6	7	5	7	6	4	5
RL32	ACAGACTATAT	4	4	5	4	4	5	5	4	6	5	5	7	6	6	4	5	6	6	5	5	7	5	5	6	6	6	6	7	5	4	4
RL33	ACAGAGACTCT	4	5	4	4	4	5	4	6	4	4	6	6	6	6	6	4	6	7	5	5	5	5	5	7	8	6	7	7	5	5	4	4
RL34	ACAGCTCGTGT	5	4	4	4	5	4	7	4	5	5	5	4	4	6	6	5	7	5	6	5	6	7	7	6	4	6	6	7	5	4	4	4	5
RL35	ACAGTGTCGAT	4	4	4	5	4	4	6	5	4	5	5	4	5	7	6	6	6	5	4	5	7	7	7	4	6	5	6	6	4	6	5	4	4	4
RL36	ACGAGCGCGCT	4	6	6	4	4	5	4	5	4	4	5	4	5	6	7	5	6	7	7	6	4	5	6	5	7	6	7	6	5	6	4	6	4	4	4
RL37	ACGATGAGTGT	5	4	5	4	4	5	6	4	4	5	4	5	5	4	6	5	7	4	6	7	4	4	5	6	6	7	6	6	5	6	4	5	4	4	5	4
RL38	ACGCGAGAGAT	4	4	6	5	4	4	5	6	5	7	5	5	6	4	7	6	6	5	7	8	5	5	7	6	6	7	7	7	4	6	5	5	5	5	5	4	4
RL39	ACGCTCTCTCT	6	6	4	5	6	4	4	4	5	4	7	5	6	8	5	6	5	7	7	7	7	7	6	6	7	8	7	8	6	4	7	5	5	4	5	4	5	6
RL40	ACGTCGCTGAT	5	5	6	4	5	4	5	4	4	5	6	4	6	5	5	6	5	6	7	6	5	6	7	4	6	7	5	6	5	6	5	5	6	4	4	4	5	4	4
RL41	ACGTCTAGCAT	6	4	5	4	4	4	4	4	4	6	5	5	5	5	4	6	4	4	5	6	5	5	5	5	6	7	5	6	6	5	4	4	7	5	4	5	5	4	4	4
RL42	ACTAGTGATAT	6	4	6	5	4	5	6	4	5	4	5	5	6	5	4	5	5	5	4	6	8	6	7	6	5	6	6	7	4	4	6	4	4	5	4	5	4	4	7	5	6
RL43	ACTCACACTGT	5	5	4	4	7	5	4	4	5	4	4	4	5	5	4	5	5	6	6	7	6	7	6	7	5	6	6	6	5	5	4	5	4	5	7	6	5	6	4	5	6	6
RL44	ACTCACTAGCT	4	5	4	5	4	4	4	5	6	4	4	4	6	5	5	6	5	5	6	5	6	6	6	6	5	6	7	7	4	4	4	4	6	6	6	5	6	5	4	4	4	5	4
RL45	ACTCTATATAT	6	4	5	5	6	5	5	5	5	5	5	6	6	6	4	6	5	5	5	6	8	7	6	7	6	7	5	7	6	4	7	4	6	6	5	8	6	4	4	5	4	4	4	4
RL46	ACTGATCTCGT	6	7	4	5	6	4	6	5	4	4	4	4	5	7	6	5	6	5	5	7	5	7	4	6	5	6	8	6	6	6	4	5	4	4	4	4	5	7	4	5	5	6	4	4	5
RL47	ACTGCTGTACT	5	5	6	5	5	4	5	4	6	4	6	4	6	6	5	5	5	4	5	4	8	5	6	7	4	5	6	7	5	4	6	4	6	4	5	5	6	6	4	4	5	4	6	4	4	4
RL48	ACTGTAGCGCT	5	5	5	6	4	6	4	5	4	5	4	5	6	6	6	4	4	4	5	5	6	6	7	5	6	5	6	5	6	6	4	7	4	5	4	4	5	5	5	4	4	5	6	5	5	4	4
RL49	AGACACTCACT	4	6	4	4	6	6	4	6	6	5	6	6	4	6	4	5	4	6	6	5	5	4	4	6	6	5	7	7	4	4	6	5	5	6	6	5	7	7	4	5	6	7	5	4	7	6	6	7
RL50	AGACATATAGT	6	4	4	4	5	4	6	5	5	6	5	6	4	4	4	6	4	4	4	6	6	5	5	6	5	5	6	7	4	4	5	4	6	6	6	8	6	6	7	7	6	6	5	5	4	5	6	7
RL51	AGACGTGATCT	4	4	5	5	4	6	6	5	4	4	7	5	4	4	5	5	4	6	5	4	6	4	7	5	7	6	6	7	4	4	6	5	4	6	5	5	5	5	6	5	6	4	7	6	6	6	6	6
RL52	AGAGTACAGAT	5	5	5	5	4	5	4	5	6	7	5	7	5	4	4	5	4	4	4	5	6	6	5	5	7	5	5	5	6	5	4	4	6	6	4	5	6	4	8	5	5	5	7	6	5	7	7	5
RL53	AGAGTATCTCT	6	5	4	6	4	6	5	5	5	5	7	7	6	7	4	4	4	5	4	5	6	6	5	7	8	6	6	6	7	5	6	5	4	5	4	5	6	7	4	6	6	6	7	7	5	4	6	4
RL54	AGATACGCTGT	6	6	4	4	6	6	5	4	5	4	4	5	4	4	4	4	6	5	5	5	4	7	4	5	6	6	6	5	6	7	4	5	5	5	7	5	4	7	5	4	6	6	4	6	7	5	7	6
RL55	AGATCTAGTCT	5	4	4	5	4	5	6	5	6	6	6	5	4	5	4	4	4	4	6	6	6	4	5	7	6	6	5	6	6	5	6	5	5	4	6	5	4	7	4	7	4	7	6	5	5	5	5	5
RL56	AGCAGCGTAGT	5	4	6	4	5	4	6	5	5	6	5	4	5	4	6	4	6	4	5	4	6	5	6	5	5	5	6	6	4	5	5	5	6	4	4	5	5	5	7	6	6	5	6	5	7	6	4	6
RL57	AGCGCACGAGT	4	6	5	4	5	4	5	4	5	7	4	5	4	4	5	5	4	4	6	6	4	6	6	6	6	6	5	4	4	6	5	6	7	4	6	5	5	4	6	5	6	7	5	4	7	6	6	6
RL58	AGCGTGTGCGT	7	6	6	7	5	4	6	4	4	6	6	4	5	5	7	6	5	4	4	6	5	5	6	6	7	6	6	5	5	7	5	7	7	6	4	4	4	5	6	5	4	6	7	7	7	5	5	4
RL59	AGCTAGATACT	5	5	6	6	4	6	4	7	4	5	5	6	5	4	5	4	4	4	4	4	7	4	5	7	6	5	6	7	6	4	5	5	5	6	7	6	6	4	5	6	5	4	6	5	4	5	4	6
RL60	AGCTGTCGACT	4	6	6	7	4	4	5	6	5	5	4	5	4	6	6	4	4	4	6	5	6	6	6	5	6	7	6	4	5	5	6	6	6	5	4	6	6	6	4	6	5	5	6	5	6	5	4	4
RL61	AGTATGCACGT	6	7	5	6	6	6	4	5	4	5	4	5	4	4	5	4	4	4	4	4	5	7	4	5	6	4	6	4	6	7	5	7	7	6	6	5	5	7	6	6	5	5	5	7	6	4	5	5
RL62	AGTCGCGCTAT	6	5	7	4	7	4	6	6	6	5	7	4	5	5	4	4	4	5	7	5	5	5	8	5	6	7	4	7	7	6	7	6	6	6	6	5	6	5	5	4	4	4	4	6	5	6	5	5
RL63	AGTCTGTCTGT	7	6	5	7	7	4	7	4	5	4	6	4	4	5	4	5	4	4	6	6	6	7	6	5	6	5	5	6	5	7	6	7	6	5	5	7	5	7	4	4	5	6	4	6	4	4	5	6
RL64	ATACACACGAT	4	5	4	4	7	7	4	7	6	6	5	6	4	5	4	6	6	7	4	6	5	7	5	5	6	4	5	5	5	5	4	5	5	6	5	6	8	5	6	6	7	6	4	5	6	6	7	6
RL65	ATACGCGTGCT	4	5	6	5	5	6	6	5	7	4	5	4	5	4	6	4	6	7	5	5	5	4	7	6	4	5	6	7	5	4	6	7	6	4	5	4	5	5	6	5	6	6	5	5	8	7	5	6
RL66	ATACTAGCACT	4	4	4	6	4	7	4	6	6	5	5	6	4	4	4	6	4	5	4	5	6	4	5	6	4	4	6	6	5	4	6	6	5	6	6	6	7	6	5	7	4	6	6	4	6	6	4	4
RL67	ATAGAGCTAGT	5	5	5	6	5	4	6	6	5	6	4	5	6	4	5	5	6	4	4	6	6	5	5	7	5	4	6	6	4	6	5	4	4	5	5	5	5	6	7	6	6	4	5	5	6	4	6	6
RL68	ATATAGAGTAT	6	4	7	5	6	7	6	5	5	6	4	6	6	5	5	4	7	5	5	6	7	5	7	7	6	6	5	6	5	6	5	5	4	6	6	7	4	5	8	6	5	4	6	7	4	7	6	5
RL69	ATCGCTCACGT	6	7	4	5	6	4	5	6	5	5	6	4	4	6	6	7	4	7	4	6	6	7	5	7	6	5	5	5	6	5	5	6	7	4	6	5	5	6	4	5	5	6	4	5	6	4	5	6
RL70	ATCGTCAGTCT	5	4	6	4	5	5	4	4	4	4	7	4	6	6	6	4	4	5	5	6	7	5	7	6	6	6	4	6	6	5	5	6	5	5	6	6	4	6	4	5	4	5	5	5	6	6	5	5
RL71	ATCTCTCGTAT	6	4	5	4	7	5	7	5	7	5	5	4	6	7	5	6	7	5	6	6	8	7	7	6	4	7	4	7	6	4	7	6	8	4	5	7	6	6	4	5	4	5	5	5	4	5	4	6
RL72	ATCTGAGACGT	5	7	5	5	5	6	6	7	4	6	5	4	4	4	7	5	5	5	4	7	6	6	6	7	6	5	6	4	5	5	4	6	4	7	5	5	5	5	7	7	5	5	4	6	5	4	5	4
RL73	ATGCTACGTCT	4	5	4	4	5	6	5	4	5	4	5	5	5	6	4	4	5	5	5	4	6	6	5	5	5	6	4	4	7	5	7	6	5	4	7	6	5	6	4	6	5	6	6	5	5	5	4	4
RL74	ATGTGACTACT	4	6	6	5	5	4	4	5	5	5	5	7	6	6	4	4	4	4	4	4	7	5	5	7	7	6	5	4	7	5	6	5	4	8	5	6	5	6	5	5	5	4	6	4	6	5	4	5
RL75	CACGAGACAGT	4	5	5	5	4	4	4	6	4	6	4	5	5	5	7	6	6	6	6	6	4	4	5	7	5	5	7	6	4	6	4	5	4	6	6	5	4	4	7	6	6	6	5	6	6	6	7	6
RL76	CACGCGAGTCT	4	4	5	5	4	5	6	6	5	5	6	4	6	6	7	5	6	6	8	5	5	4	7	6	5	7	6	8	5	5	6	6	4	5	6	5	4	4	5	6	5	6	6	5	6	6	5	6
RL77	CACGCTACGAT	4	4	5	4	5	5	5	5	6	6	4	5	5	6	5	7	6	7	6	4	5	5	4	4	5	5	4	6	6	5	6	5	6	5	5	6	6	4	5	5	4	7	6	5	5	6	6	5
RL78	CACGTGTATAT	6	4	7	6	4	4	5	5	5	6	6	6	7	7	5	7	5	4	6	5	7	4	7	6	5	6	5	7	5	5	8	4	6	7	4	7	5	5	5	5	4	4	7	7	4	6	5	6
RL79	CACTACGATGT	4	5	4	5	6	6	6	4	4	4	4	5	4	4	5	6	7	7	6	4	4	6	4	5	4	6	5	4	5	5	6	5	6	4	6	6	4	6	6	5	7	4	4	5	5	6	6	7
RL80	CACTATACTCT	6	5	4	5	5	7	4	6	5	4	4	6	6	7	4	4	5	6	5	5	6	5	5	7	6	6	6	7	7	4	6	6	4	7	6	6	5	7	4	7	6	5	4	5	4	4	6	4
RL81	CAGCGTACTGT	6	4	4	6	6	4	6	4	5	5	6	5	6	6	5	6	4	4	5	4	5	5	5	6	5	5	5	6	6	6	6	5	4	4	5	6	5	6	6	5	6	6	5	6	7	6	5	6
RL82	CAGTCTCTAGT	7	6	5	6	7	4	6	5	6	6	5	5	4	5	4	7	5	4	6	4	6	6	5	5	4	6	6	6	6	5	6	4	6	4	4	7	7	7	5	5	6	6	6	4	5	5	5	7
RL83	CATAGTCGCGT	6	6	5	7	6	6	6	5	5	5	5	5	4	6	7	5	6	6	4	5	4	6	4	4	4	5	6	5	4	7	4	7	5	4	5	5	6	8	7	5	6	6	7	6	8	5	8	5
RL84	CGAGACACTAT	6	6	6	4	5	6	5	6	6	7	7	8	6	7	4	5	6	6	6	5	4	5	4	5	6	6	6	6	6	6	5	4	4	6	6	5	6	5	6	6	7	5	5	6	6	7	7	7
RL85	CGAGAGTGTGT	7	6	7	5	6	6	8	4	5	6	6	6	6	6	7	5	8	5	6	6	4	4	4	6	6	5	7	7	4	8	5	5	5	5	5	5	4	5	7	7	8	6	7	8	7	6	7	7
RL86	CGAGTCATCGT	7	7	5	6	5	4	6	6	4	5	7	5	4	6	7	5	6	5	4	5	4	6	4	5	4	6	7	5	6	5	4	6	5	5	5	5	5	7	6	7	6	5	6	6	7	4	7	6
RL87	CGATCGTATAT	7	4	7	5	5	5	7	6	6	5	6	7	5	6	5	7	4	5	5	5	6	4	4	4	4	6	4	7	7	6	8	4	7	6	6	6	5	6	5	5	5	5	7	7	5	6	6	8
RL88	CGCAGTACGCT	5	6	5	6	4	6	5	6	5	6	6	6	6	7	5	4	4	6	6	4	4	4	4	4	6	4	5	5	5	6	5	7	5	6	5	4	7	5	5	7	6	7	6	4	7	7	5	4
RL89	CGCGATCGTAT	5	4	6	4	6	4	7	6	5	6	6	6	7	7	6	5	7	5	7	5	4	4	6	4	5	7	4	7	7	6	7	6	6	5	5	6	5	4	5	5	6	6	7	7	5	6	6	7
RL90	CGCGCTATACT	6	5	6	6	4	4	5	6	6	6	7	6	6	6	5	7	4	5	5	5	6	4	5	6	6	6	6	6	7	4	8	5	7	7	7	6	7	5	4	5	6	6	7	5	5	7	4	7
RL91	CGTACAGATAT	7	6	8	4	6	7	4	4	5	6	6	8	6	4	4	5	6	5	7	4	6	4	5	4	5	4	4	5	6	6	6	5	6	7	7	7	6	5	7	5	5	4	6	7	5	8	6	7
RL92	CGTAGCTCTCT	8	7	6	6	6	6	4	4	4	4	8	6	6	7	4	4	5	7	6	5	6	6	5	4	5	6	6	7	7	6	8	6	5	5	6	4	7	8	4	5	6	6	6	6	7	5	5	5
RL93	CGTATAGTGCT	8	6	7	6	5	7	5	4	5	6	5	7	7	5	5	4	6	4	6	4	6	4	4	4	5	4	6	6	6	7	6	7	6	6	7	5	4	6	6	6	5	7	6	6	6	7	6	4
RL94	CGTCAGCGACT	5	7	8	5	5	6	4	6	6	7	6	5	5	5	6	4	5	6	7	4	5	4	5	4	6	5	6	5	5	6	5	7	6	7	6	5	6	5	6	4	4	6	6	5	7	7	6	4
RL95	CGTCGCAGTGT	7	5	7	5	6	6	6	4	5	7	7	4	6	4	6	5	5	4	7	6	4	4	6	5	5	5	4	6	6	7	6	7	7	5	7	6	4	5	6	4	5	7	4	6	7	7	6	6
RL96	CGTCTCACGAT	6	7	6	5	6	6	5	6	6	7	5	6	4	6	4	6	5	6	6	6	5	6	4	4	6	6	4	5	7	6	7	6	8	6	5	6	7	6	5	4	4	7	5	6	6	6	7	6
RL97	CGTGACTCAGT	6	7	5	6	7	4	4	4	4	6	6	6	5	5	5	5	6	4	7	5	4	5	4	4	4	6	6	5	6	7	6	6	5	6	6	6	5	6	6	5	6	6	5	5	8	4	6	7
RL98	CTACACGCTCT	5	6	5	4	7	6	5	6	7	4	5	5	6	7	6	4	7	8	7	5	4	5	6	6	4	5	6	6	7	5	6	6	5	6	7	5	7	8	5	6	7	6	4	5	7	6	6	5
RL99	CTACGATATGT	6	5	6	6	6	6	6	5	5	4	6	6	6	4	6	6	7	7	4	5	4	4	5	5	4	4	6	6	6	6	6	5	6	6	7	7	4	6	7	7	7	5	5	6	4	5	6	7
RL100	CTAGACAGACT	4	7	7	6	4	7	5	7	6	6	4	6	5	5	7	4	6	7	5	4	5	4	5	5	5	5	6	5	6	5	4	5	5	7	7	6	7	5	8	6	7	5	6	5	6	7	5	6
RL101	CTAGTACTCAT	7	5	4	6	5	6	5	6	5	4	5	6	6	6	4	5	5	6	4	4	5	6	4	4	5	6	4	5	7	7	6	5	5	7	5	6	7	7	7	6	6	4	6	6	6	5	7	5
RL102	CTATATGTCGT	7	7	5	6	6	7	7	5	5	5	4	5	6	7	7	5	8	5	4	5	5	6	4	4	4	4	6	4	6	7	6	7	7	6	5	7	5	8	6	8	6	6	6	6	5	4	6	5
RL103	CTATCGACACT	4	7	6	6	6	7	4	8	7	4	5	6	5	5	6	6	4	7	6	5	4	4	5	5	4	6	7	5	7	5	6	7	5	8	7	5	6	7	6	7	6	5	6	6	6	6	6	5
RL104	CTATGTAGAGT	6	5	7	8	4	6	7	6	5	6	4	7	6	4	7	6	6	4	4	5	5	5	5	4	4	5	6	5	5	7	6	7	7	6	5	7	4	6	8	7	6	5	7	6	5	6	6	5
RL105	CTCACGTACAT	5	4	6	5	6	6	6	7	7	5	6	4	6	6	5	6	5	7	6	4	6	5	5	4	4	4	5	5	6	5	7	5	7	7	6	7	8	6	7	6	6	5	5	4	5	6	5	7
RL106	CTCGAGTCTCT	6	6	6	6	5	5	6	6	6	4	8	4	7	7	7	6	6	7	6	6	6	4	6	6	6	6	6	7	6	6	7	6	4	6	6	5	6	6	5	7	6	6	5	5	5	4	6	5
RL107	CTCGTCGAGAT	5	5	7	6	6	4	6	6	6	6	5	5	6	5	7	7	6	6	6	6	5	5	7	4	4	7	4	5	5	6	7	6	8	6	6	6	6	4	7	4	4	4	7	5	5	6	7	5
RL108	CTCTACAGCGT	6	7	4	6	7	7	6	5	5	6	4	5	6	5	7	7	5	7	5	6	4	7	4	5	5	5	5	4	6	6	4	8	7	6	7	6	6	6	7	7	5	7	4	4	5	6	6	5
RL109	CTGTCGTGCGT	7	7	6	7	7	6	7	5	5	6	6	4	6	5	7	6	5	5	5	4	4	6	5	4	4	5	5	4	6	6	5	7	8	5	5	6	6	6	7	5	5	7	7	6	7	4	5	4
RL110	CTGTGACGTGT	6	6	6	5	7	6	7	4	6	6	4	5	7	6	7	4	7	5	6	4	4	6	6	4	5	6	4	4	7	8	6	7	5	5	5	6	4	6	7	6	7	5	5	7	6	6	6	5
RL111	GACGCTGTCGT	6	6	4	6	6	4	7	4	4	6	7	4	4	6	8	6	7	6	6	7	4	5	5	6	5	5	6	6	5	6	5	6	7	4	4	6	5	6	4	6	5	7	6	6	6	4	4	6
RL112	GACGTATGACT	4	5	7	6	4	6	4	4	4	6	5	7	5	5	6	6	4	6	5	4	5	4	6	5	7	5	4	4	5	5	7	6	6	7	5	6	5	6	5	5	5	5	7	6	6	6	5	5
RL113	GACTAGCTAGT	6	5	4	6	5	4	6	5	4	5	4	4	5	5	4	6	6	4	5	5	5	4	4	7	4	4	5	5	5	6	6	5	6	5	6	5	6	6	7	5	5	5	5	4	6	4	5	6
RL114	GAGACGTCGCT	4	5	6	6	5	6	6	6	6	4	7	6	4	6	6	4	4	6	7	4	4	5	5	4	6	5	6	4	6	6	5	6	5	6	5	4	6	7	6	6	6	8	8	6	8	6	7	6
RL115	GAGAGAGACGT	5	7	6	6	4	7	6	7	5	8	6	6	4	4	7	5	6	5	4	6	5	5	5	7	8	4	7	4	5	7	4	6	4	7	5	5	5	5	9	8	7	6	6	8	8	6	7	6
RL116	GCGTAGACTAT	6	5	7	4	5	5	4	5	4	5	5	7	6	6	4	4	5	5	6	6	6	5	5	4	6	6	4	4	7	7	7	5	4	7	5	6	5	5	6	4	5	5	5	6	5	6	7	5
RL117	GCGTCGTGTCT	6	5	7	5	5	5	6	4	5	4	7	4	7	6	7	5	5	6	7	5	6	4	7	5	7	7	5	6	6	6	7	6	6	5	6	5	5	6	4	4	5	5	7	6	6	6	5	5
RL118	GCTCTCTACGT	6	7	4	7	7	4	6	6	6	5	5	4	4	7	6	8	6	6	5	6	7	7	4	7	4	4	5	4	6	4	6	6	8	6	6	7	7	7	4	6	5	7	4	4	4	4	4	6
RL119	GTACACTGTAT	6	4	6	4	7	6	6	5	7	6	6	7	7	6	4	4	7	6	7	6	6	6	6	5	4	4	4	6	5	5	6	4	7	5	5	8	7	7	6	5	6	5	5	6	6	8	5	8
RL120	GTACGCGACAT	4	6	7	6	6	5	5	7	6	6	6	5	4	4	5	5	5	8	6	5	5	5	6	4	5	4	5	4	6	6	7	6	6	7	6	6	7	5	7	6	5	5	7	7	7	8	6	6
RL121	GTACTATAGAT	6	5	5	6	5	6	6	5	6	7	4	8	6	4	4	7	6	5	4	6	7	6	5	4	4	4	5	6	6	5	7	6	7	7	5	8	6	5	7	6	5	5	7	5	4	7	6	6
RL122	GTACTGAGTCT	5	5	5	7	6	7	6	5	6	5	7	5	6	4	4	4	6	6	6	6	6	4	6	6	5	4	5	6	6	5	7	7	5	6	6	7	5	7	6	7	6	5	7	5	7	5	5	5
RL123	GTAGCTAGCGT	7	6	5	8	6	7	7	5	5	7	6	6	5	4	5	6	6	5	4	6	5	7	4	6	5	4	5	4	7	7	4	6	7	4	6	6	6	6	7	6	5	7	7	5	8	6	7	5
RL124	GTAGTCACTGT	7	6	5	6	7	7	6	6	6	6	6	6	5	6	4	5	5	5	4	6	6	7	5	6	5	4	4	4	7	6	5	6	5	5	6	7	6	8	6	5	7	5	5	5	7	6	8	7
RL125	GTAGTGTCACT	6	6	7	8	6	6	6	6	6	5	7	6	6	6	6	5	4	5	4	5	7	5	7	5	5	4	5	5	6	6	7	7	5	7	4	6	8	8	6	7	7	5	7	7	8	6	5	6
RL126	GTATACATAGT	7	6	5	6	8	6	5	6	5	7	4	7	7	5	4	5	6	4	5	5	7	7	4	6	4	4	4	4	5	5	5	5	7	7	8	9	7	7	8	8	7	6	6	6	5	6	7	8
RL127	GTCATCGTCGT	6	6	5	6	7	6	7	6	5	6	6	4	4	6	7	5	6	5	6	6	5	7	6	4	4	4	4	4	6	6	6	8	7	5	5	6	6	8	6	6	6	8	6	6	7	4	7	7
RL128	GTCGACACGCT	5	8	6	4	6	7	4	7	6	6	6	6	6	5	6	5	4	7	5	7	4	6	6	6	7	5	4	4	7	7	5	7	5	7	7	4	7	6	6	6	6	8	5	5	7	6	8	6
RL129	GTCGAGTGAGT	6	6	7	7	4	5	7	5	6	7	6	5	6	4	6	6	6	4	6	7	5	4	7	6	5	4	4	5	4	8	6	7	7	6	6	5	5	5	8	5	6	5	7	6	7	7	7	7
RL130	GTCTACTATCT	6	6	5	7	6	7	6	5	6	4	6	7	6	7	4	5	4	5	6	5	7	5	5	7	6	5	4	4	8	5	7	5	7	7	7	7	7	8	5	7	6	5	6	4	4	6	5	7
RL131	GTGTCTAGACT	6	7	7	7	4	5	5	6	6	7	6	7	5	5	6	6	4	5	6	6	7	5	7	6	6	5	6	4	8	6	7	6	8	7	6	7	7	6	6	6	4	7	7	5	6	6	5	6
RL132	GTGTGTATCGT	8	7	6	8	6	5	7	6	4	6	7	6	6	6	7	7	6	4	4	6	7	6	6	6	6	4	5	4	8	8	7	7	7	8	6	7	6	7	6	7	5	6	8	7	6	5	5	5
[truncated: 83 more columns]

## Sheet: SuppFig8-Barcrawl-Edit
Figure S8: Pairwise edit distance comparisons between 81 sequence tags designed using barcrawl Frank 2009. We generated these tags using: `barcrawl -l 6 -m 3`. Barcrawl uses a hybrid approach to account for substitutions and a single deletion that produces sequence tags approximately equal to a minimum edit distance of two, allowing tags to differentiate samples sufficiently in the presence of in…
	TTATCC	TTAAGG	TTCTTG	TTCAAC	TTCCGT	TTCGCA	TTGTGA	TTGACT	TTGGTC	TATTCG	TATAGC	TAACTC	TACCAA	TACGTT	TAGTAC	TAGATG	TCTACA	TCTCGG	TCTGAT	TCATGT	TCAGCG	TCGCTT	TGTCTA	TGTGCC	TGACAG	TGAGGA	TGCACG	ATTCTC	ATTGAG	ATACCT	ATCTGC	ATGCAA	AATCCA	AATGGT	AACTAG	AACACT	AAGAGA	AAGGCC	ACTTAC	ACATTG	ACAACC	ACACGA	ACCTCA	ACCAGG	ACGAAT	ACGGTA	AGTTGG	AGTCAT	AGAAGT
TTAAGG	3
TTCTTG	3	3
TTCAAC	3	3	3
TTCCGT	4	3	3	3
TTCGCA	3	4	3	3	3
TTGTGA	3	3	3	4	3	3
TTGACT	3	3	4	3	3	3	3
TTGGTC	3	4	3	3	3	3	3	3
TATTCG	3	4	3	5	3	4	4	4	4
TATAGC	3	3	4	3	4	3	4	4	3	3
TAACTC	3	4	4	4	4	4	5	3	3	3	3
TACCAA	4	5	4	3	3	3	4	5	5	4	4	3
TACGTT	5	4	3	4	3	3	4	4	3	4	4	3	3
TAGTAC	3	5	4	3	5	4	3	3	3	3	2	3	3	3
TAGATG	4	3	3	4	5	5	3	3	3	3	3	3	4	3	3
TCTACA	3	4	4	3	4	3	4	3	5	3	3	4	3	5	3	4
TCTCGG	4	3	3	4	3	3	4	5	4	3	3	4	4	4	5	4	3
TCTGAT	4	4	4	4	3	4	3	2	3	4	4	5	4	3	4	3	3	3
TCATGT	3	3	3	4	3	5	3	4	4	4	3	4	5	3	4	3	4	3	2
TCAGCG	3	3	4	3	4	3	4	4	4	3	3	4	4	4	4	3	3	3	3	3
TCGCTT	5	5	3	5	3	3	4	3	3	5	5	3	4	2	4	3	4	3	3	3	3
TGTCTA	4	5	3	3	4	3	3	3	4	4	4	3	3	4	4	4	3	3	4	4	5	3
TGTGCC	3	5	5	4	4	3	3	3	3	3	3	4	5	4	3	4	3	4	3	4	3	4	3
TGACAG	4	3	4	4	4	4	4	3	5	4	3	3	3	4	4	3	3	3	4	4	3	4	3	4
TGAGGA	4	3	5	5	4	3	3	4	4	5	4	4	4	4	3	3	4	4	4	3	3	5	3	3	3
TGCACG	4	3	3	3	3	3	5	3	4	3	4	4	4	4	3	3	3	3	5	3	2	4	4	3	2	3
ATTCTC	3	5	3	3	4	3	4	4	3	3	4	3	5	4	4	5	4	4	5	5	5	4	3	4	5	6	4
ATTGAG	5	3	4	4	4	4	3	3	4	3	4	6	5	5	4	3	5	4	3	5	4	5	5	4	4	4	4	3
ATACCT	3	4	4	4	3	4	5	3	5	4	3	3	3	3	4	4	4	5	5	4	4	4	4	4	4	5	4	3	4
ATCTGC	3	4	3	3	3	3	3	4	4	4	3	3	5	5	4	4	3	3	3	3	3	4	4	3	5	5	5	2	3	4
ATGCAA	5	5	5	3	4	3	3	4	4	4	4	5	3	5	4	5	4	5	4	5	5	4	3	4	3	4	3	3	3	3	4
AATCCA	3	6	5	4	4	3	5	5	6	3	4	4	3	5	4	5	3	4	5	5	5	5	3	4	5	5	5	3	4	3	4	3
AATGGT	5	4	5	6	4	5	4	4	3	4	3	5	5	3	5	4	5	4	3	3	5	5	5	4	5	4	6	4	3	4	4	4	3
AACTAG	5	5	3	4	5	5	5	5	6	3	3	3	3	4	3	4	4	4	4	5	5	5	4	6	3	5	4	4	3	4	3	4	3	3
AACACT	5	5	5	4	4	4	6	3	6	4	4	3	4	3	4	4	4	5	5	4	4	4	5	5	4	6	3	4	5	2	4	4	3	3	3
AAGAGA	6	4	6	5	5	5	3	4	5	5	3	5	4	5	4	3	4	5	5	5	4	5	5	5	4	3	5	5	3	5	4	3	3	3	3	3
AAGGCC	4	4	6	5	6	4	5	4	3	4	4	4	5	4	3	4	5	6	5	5	4	5	5	3	5	4	5	4	4	4	4	4	3	3	4	3	3
ACTTAC	4	5	4	4	5	5	5	4	5	4	4	4	4	4	3	5	3	4	3	4	5	5	4	4	5	6	5	3	3	4	3	4	4	4	3	4	5	4
ACATTG	4	4	3	5	5	6	5	5	5	3	4	4	5	3	5	3	5	4	5	3	3	4	5	6	4	5	4	4	4	4	4	5	4	3	3	3	4	5	3
ACAACC	3	4	6	3	6	5	6	4	5	5	4	3	4	5	4	5	3	5	5	4	3	5	6	4	5	5	4	4	5	3	4	4	3	5	4	3	4	3	3	3
ACACGA	5	4	5	5	4	4	4	5	6	4	4	4	3	4	5	4	3	3	4	3	3	4	4	6	4	3	3	4	4	3	4	3	3	4	3	3	3	4	4	3	3
ACCTCA	4	6	4	5	5	3	4	5	5	4	5	3	3	4	5	5	3	4	4	4	4	4	4	5	5	5	4	3	4	4	3	4	3	5	3	3	4	4	3	3	3	3
ACCAGG	6	3	4	4	4	5	5	5	6	5	4	5	3	5	5	4	4	3	5	4	3	5	6	6	4	4	3	5	4	5	3	4	4	4	3	3	3	4	4	3	3	3	3
ACGAAT	6	5	6	4	5	4	5	3	5	6	5	5	3	3	4	4	4	5	3	4	5	3	5	6	4	5	5	5	4	4	5	3	5	4	4	3	3	4	3	3	3	4	4	3
ACGGTA	6	5	5	6	4	4	4	5	3	6	5	5	4	3	4	4	4	5	4	4	4	3	4	5	5	4	6	4	4	5	4	3	4	3	4	4	3	3	3	3	4	3	3	4	3
AGTTGG	5	4	4	6	5	5	4	5	4	3	4	5	6	4	4	3	5	3	5	4	5	5	4	4	4	4	4	4	2	5	3	5	4	3	3	5	4	5	3	3	5	4	4	3	5	4
AGTCAT	5	5	4	4	4	5	4	4	5	4	5	5	4	4	3	4	4	4	3	4	5	4	3	4	3	5	4	3	3	3	4	3	3	3	4	3	4	4	3	4	5	4	3	4	3	4	3
AGAAGT	5	3	6	5	4	6	5	4	5	5	4	4	5	4	4	3	5	5	5	3	5	5	5	5	3	3	4	5	4	3	4	4	5	3	4	3	3	4	5	4	3	3	5	3	2	4	3	3
AGCCTG	5	5	3	5	4	5	5	4	5	4	6	4	4	4	5	3	6	4	5	4	4	4	3	5	3	5	3	3	4	3	3	4	4	5	3	3	5	4	4	3	5	4	3	3	4	4	3	3	4
AGCGAC	5	6	5	3	5	4	4	4	4	5	4	4	4	4	3	5	4	5	4	6	4	5	4	3	4	4	3	4	3	5	3	3	4	4	3	3	3	3	3	5	3	3	4	4	3	4	4	3	4
AGGTTC	4	6	4	5	6	6	4	5	3	4	5	4	6	3	3	4	5	6	5	5	6	4	4	4	5	5	5	3	5	5	3	4	4	4	4	5	4	3	3	3	4	5	4	5	4	3	3	4	4
CTTATG	3	3	3	4	4	5	3	4	4	4	4	4	6	5	5	3	4	4	3	3	4	5	4	5	4	4	4	3	3	5	4	5	5	5	4	5	5	6	3	3	5	5	5	4	4	5	4	4	5
CTACGC	3	3	5	4	3	3	4	4	4	4	3	3	4	3	4	5	3	3	5	4	4	4	5	4	4	4	4	3	5	3	3	4	5	5	4	4	5	4	4	5	3	3	5	4	5	5	5	5	4
CTAGAA	4	4	5	4	5	3	4	4	4	5	4	5	3	4	3	3	3	4	3	5	4	5	5	5	4	3	5	5	3	4	5	3	5	5	4	5	3	5	4	5	5	4	5	4	4	4	5	5	4
CTCTCT	3	5	3	4	3	3	4	3	4	4	5	4	5	4	5	5	3	3	3	3	4	3	3	4	5	6	4	3	5	3	3	5	4	5	4	3	6	5	4	5	5	5	3	5	5	5	5	4	5
CTCCAG	5	4	3	3	3	3	5	5	5	4	4	5	3	5	5	4	3	3	4	4	4	4	4	5	3	5	3	4	3	4	4	3	3	6	3	5	5	6	4	5	5	4	4	3	5	5	5	4	5
CATCTT	4	6	3	5	4	5	5	5	5	4	4	3	4	3	5	4	5	4	4	3	4	3	3	5	5	6	5	3	5	3	3	4	3	3	4	4	5	5	4	3	4	4	4	5	5	5	5	3	5
CATGAC	4	5	5	4	6	5	4	3	4	4	3	4	4	4	3	4	4	5	3	3	4	6	5	3	4	4	4	4	3	4	4	3	4	3	4	4	4	3	3	4	4	3	4	5	4	5	5	4	5
CAAGTG	5	3	4	5	5	5	4	5	4	4	4	3	5	3	4	3	5	4	5	3	3	5	5	5	4	4	5	5	4	5	4	5	5	4	3	4	3	4	5	3	4	4	5	3	4	4	4	5	3
CACATA	5	5	4	4	5	4	5	5	5	5	4	4	3	3	4	3	4	5	4	4	5	4	4	6	4	5	4	5	5	4	5	4	4	5	3	3	3	5	3	3	4	3	3	4	4	3	5	4	5
CCTTGA	5	5	3	5	5	4	3	4	5	4	4	6	5	5	5	5	3	3	3	3	5	4	4	5	6	4	5	5	3	6	4	5	4	4	4	6	4	6	3	3	5	3	3	4	5	4	3	5	5
CCAATT	5	4	5	4	5	6	6	4	5	5	5	4	4	4	5	4	4	5	4	3	4	3	5	6	5	5	5	5	6	4	6	5	5	4	5	4	5	6	5	3	3	4	5	4	3	4	5	5	3
CCGTAG	5	5	4	5	4	4	4	5	5	4	4	6	5	4	3	4	4	4	4	4	4	4	5	5	4	5	4	6	4	6	5	4	6	5	3	6	4	5	3	3	5	4	4	4	3	3	4	4	4
CGTACT	4	5	5	5	4	5	5	3	5	4	4	4	5	4	3	5	3	5	4	4	5	4	3	3	4	5	3	4	5	3	5	5	4	4	5	3	5	5	3	5	4	5	4	5	3	4	4	3	3
CGATTA	4	5	4	6	6	5	4	4	5	4	5	4	5	4	4	4	4	6	4	4	5	3	3	5	4	3	5	5	4	5	5	5	4	5	4	5	4	6	4	3	5	4	4	5	3	3	4	4	4
CGGTGT	5	5	5	6	4	6	3	4	4	5	5	6	6	4	4	4	6	5	4	3	4	3	4	4	5	4	5	5	5	5	4	5	6	4	5	5	4	5	5	4	6	5	5	5	4	3	3	4	3
CGGAAC	5	5	6	3	6	5	5	4	4	6	4	5	5	6	3	4	5	6	4	6	5	5	5	4	4	4	4	5	5	5	5	4	6	6	5	5	4	4	4	6	4	5	5	5	3	3	5	4	4
GTTAGT	4	3	4	4	3	4	4	3	3	4	3	4	6	4	4	4	4	4	4	3	4	5	4	5	4	4	5	4	3	4	4	5	5	3	4	4	4	6	4	5	5	5	6	4	4	5	3	3	3
GTAACA	3	3	5	3	5	3	4	3	5	4	4	3	3	5	4	4	3	5	5	5	4	5	4	4	3	4	4	5	5	3	5	4	4	6	4	4	4	5	4	5	3	4	4	5	5	5	5	4	4
GTGTAT	4	5	4	4	4	4	3	3	4	5	4	5	5	4	3	4	4	5	3	4	6	4	3	4	4	4	4	4	4	4	4	3	5	4	4	5	5	5	4	5	6	6	5	6	3	4	4	3	4
GTGCTG	5	4	3	5	4	4	3	3	3	4	5	4	5	4	5	3	5	4	4	4	4	3	3	3	3	4	3	3	4	4	3	3	5	4	4	5	5	5	6	4	6	5	5	5	5	4	4	4	5
GATAAG	5	3	5	4	5	6	5	5	6	3	3	5	4	5	4	3	4	4	4	5	5	6	5	5	3	4	4	5	3	4	4	4	4	4	3	4	4	5	4	4	4	4	5	4	4	5	4	4	3
GAATCT	3	5	5	5	5	5	5	4	5	3	4	3	5	4	4	4	5	5	5	3	4	5	4	5	5	5	4	3	5	3	4	5	3	3	4	3	5	4	5	4	4	5	4	6	4	5	5	3	3
GAACGG	5	3	5	5	4	5	5	5	6	4	4	3	4	4	5	4	5	3	6	4	4	5	5	5	3	4	3	5	4	4	4	5	4	3	3	4	4	4	6	4	4	3	5	3	5	4	4	5	3
GACTGA	5	5	4	5	4	4	3	4	6	4	4	4	3	4	4	4	4	4	3	4	5	5	3	5	3	3	4	5	3	5	3	4	4	4	3	4	3	5	3	4	5	3	3	4	4	3	4	4	4
GCTATC	3	5	4	4	5	5	5	5	4	4	3	4	5	5	4	4	3	4	3	4	4	4	4	4	5	6	4	3	5	4	4	5	5	5	4	5	5	5	3	4	3	5	4	4	4	4	5	4	5
GCTCAA	5	5	5	3	5	4	5	5	5	5	5	5	3	6	5	6	3	3	3	5	5	4	3	5	4	5	4	4	4	5	5	3	3	5	4	5	5	6	3	5	5	3	3	4	4	4	5	3	6
GGATGC	3	4	5	5	5	5	4	5	4	4	3	4	6	5	4	3	5	5	5	3	4	5	5	3	4	3	4	5	5	5	3	4	4	4	5	5	4	4	4	4	4	4	5	5	5	5	3	5	3
GGACTT	5	5	4	6	4	6	6	3	5	5	6	3	5	3	5	4	5	5	5	4	5	3	3	5	3	4	4	4	6	3	5	5	5	5	4	4	5	5	4	4	5	4	5	6	4	5	5	3	3
GGCAAT	6	5	5	3	4	5	5	4	6	6	5	5	4	4	5	5	5	6	4	4	5	4	4	5	4	5	3	6	5	5	5	3	5	5	4	3	5	5	5	4	4	5	5	4	3	5	5	3	3
GGCGTA	6	6	4	5	4	3	4	5	4	6	6	5	4	3	4	5	5	5	5	5	5	4	3	4	5	3	4	5	5	5	5	4	5	5	4	5	4	5	4	5	6	4	4	5	4	3	5	4	4
[truncated: 32 more columns]

## Sheet: SuppFig9-IlluminaTruSeq-Hamm
Figure S9. Pairwise Hamming distance comparisons between the 48 sequence tags provided as part of the Illumina TruSeq library preparation kits. The tags used within the DNA and RNA kits are a subset of those used within the smallRNA kit. The minimum expected Hamming distance of the set is three. The minimum observed Hamming distance of the set is two.
		IDX1	IDX2	IDX3	IDX4	IDX5	IDX6	IDX7	IDX8	IDX9	IDX10	IDX11	IDX12	IDX13	IDX14	IDX15	IDX16	IDX17	IDX18	IDX19	IDX20	IDX21	IDX22	IDX23	IDX24	IDX25	IDX26	IDX27	IDX28	IDX29	IDX30	IDX31	IDX32	IDX33	IDX34	IDX35	IDX36	IDX37	IDX38	IDX39	IDX40	IDX41	IDX42	IDX43	IDX44	IDX45	IDX46	IDX47
		ATCACG	CGATGT	TTAGGC	TGACCA	ACAGTG	GCCAAT	CAGATC	ACTTGA	GATCAG	TAGCTT	GGCTAC	CTTGTA	AGTCAA	AGTTCC	ATGTCA	CCGTCC	GTAGAG	GTCCGC	GTGAAA	GTGGCC	GTTTCG	CGTACG	GAGTGG	GGTAGC	ACTGAT	ATGAGC	ATTCCT	CAAAAG	CAACTA	CACCGG	CACGAT	CACTCA	CAGGCG	CATGGC	CATTTT	CCAACA	CGGAAT	CTAGCT	CTATAC	CTCAGA	GACGAC	TAATCG	TACAGC	TATAAT	TCATTC	TCCCGA	TCGAAG
IDX2	CGATGT	6
IDX3	TTAGGC	5	4
IDX4	TGACCA	5	4	4
IDX5	ACAGTG	4	5	4	5
IDX6	GCCAAT	4	5	6	6	5
IDX7	CAGATC	5	5	5	6	5	5
IDX8	ACTTGA	5	4	5	5	4	5	6
IDX9	GATCAG	5	6	6	5	5	4	5	5
IDX10	TAGCTT	6	5	5	4	5	5	3	6	4
IDX11	GGCTAC	5	4	5	5	6	3	5	5	4	6
IDX12	CTTGTA	5	5	4	5	4	6	4	4	5	5	6
IDX13	AGTCAA	5	5	6	3	5	5	6	3	3	5	4	4
IDX14	AGTTCC	4	4	5	4	5	6	5	3	5	6	3	5	3
IDX15	ATGTCA	3	5	5	4	5	6	5	3	6	5	5	4	4	3
IDX16	CCGTCC	5	4	5	5	5	5	3	4	6	5	4	5	6	3	3
IDX17	GTAGAG	4	5	3	5	3	4	6	6	3	6	4	4	5	6	5	6
IDX18	GTCCGC	4	5	3	5	6	4	5	5	4	5	3	5	5	5	5	5	4
IDX19	GTGAAA	4	6	5	5	6	3	4	5	4	5	4	4	4	6	3	5	3	4
IDX20	GTGGCC	4	6	3	5	5	5	4	6	5	5	4	4	6	4	3	3	3	3	3
IDX21	GTTTCG	3	5	5	5	5	5	6	4	3	6	4	4	5	3	3	4	3	4	4	3
IDX22	CGTACG	3	4	6	4	5	5	4	5	4	6	5	4	4	3	5	4	5	6	5	5	3
IDX23	GAGTGG	5	4	5	6	5	5	4	4	3	4	4	6	6	5	4	4	4	4	4	4	3	5
IDX24	GGTAGC	5	4	4	5	6	4	4	4	4	6	3	5	4	3	6	5	5	3	4	4	4	3	4
IDX25	ACTGAT	5	5	5	6	3	3	6	3	4	5	5	4	3	4	5	5	4	6	5	5	5	5	6	5
IDX26	ATGAGC	3	5	3	6	5	5	3	4	6	5	5	5	5	4	3	4	5	3	3	3	5	5	4	3	5
IDX27	ATTCCT	3	5	5	4	5	5	6	4	4	4	6	4	3	3	3	5	5	4	5	4	3	4	6	5	3	4
IDX28	CAAAAG	4	4	5	5	4	4	3	6	3	5	5	5	5	6	6	5	3	6	4	6	5	3	4	5	5	5	6
IDX29	CAACTA	6	4	5	3	4	6	3	5	4	3	6	3	4	6	5	5	5	5	5	6	6	5	5	6	6	6	5	3
IDX30	CACCGG	4	4	5	5	5	5	4	5	3	4	5	5	5	6	6	5	5	3	6	6	5	4	3	5	6	5	5	3	3
IDX31	CACGAT	5	4	5	6	5	3	4	6	4	4	4	4	5	6	6	5	4	5	5	5	6	5	5	6	3	6	5	3	4	3
IDX32	CACTCA	4	4	6	4	6	5	4	4	5	5	4	4	5	4	3	3	6	5	5	5	4	4	4	6	6	6	5	4	3	3	3
IDX33	CAGGCG	4	5	5	5	4	6	3	6	4	4	6	4	6	5	4	3	4	6	5	3	4	3	3	6	5	5	5	3	4	3	3	3
IDX34	CATGGC	6	4	3	6	5	6	3	4	4	5	5	3	5	4	6	4	5	4	6	4	5	4	4	3	4	4	5	4	4	3	3	4	3
IDX35	CATTTT	6	3	6	6	5	5	3	4	4	3	5	3	5	4	5	4	6	6	6	6	4	4	4	5	4	6	4	4	3	4	3	3	4	3
IDX36	CCAACA	4	4	5	3	4	4	4	4	6	6	6	4	5	5	4	3	5	6	4	5	5	3	6	5	5	5	5	3	3	5	5	3	4	5	5
IDX37	CGGAAT	5	3	6	5	6	3	3	6	5	4	4	5	4	5	5	4	5	6	3	5	6	3	5	4	4	4	5	3	5	5	3	5	4	5	4	4
IDX38	CTAGCT	4	3	3	4	4	5	5	6	6	5	6	3	6	5	4	4	3	5	5	3	4	4	6	6	4	5	3	4	4	5	3	4	3	4	4	3	4
IDX39	CTATAC	5	3	3	5	5	5	4	5	5	6	3	4	5	4	4	3	3	4	4	4	4	5	5	5	5	4	5	3	4	5	4	4	5	4	4	4	4	3
IDX40	CTCAGA	3	4	4	5	6	4	4	4	6	6	5	3	5	6	4	5	5	3	3	5	5	4	5	4	6	3	5	4	4	3	4	3	5	4	5	3	4	4	4
IDX41	GACGAC	5	6	4	6	5	3	4	6	3	5	2	5	5	5	6	5	3	3	4	3	5	6	4	4	4	5	6	4	5	4	2	4	4	3	5	6	5	5	4	5
IDX42	TAATCG	4	4	4	3	4	6	5	5	4	4	5	6	6	4	4	4	4	6	6	5	3	4	3	6	6	6	5	3	4	4	5	3	3	5	4	4	6	4	4	6	5
IDX43	TACAGC	4	5	3	5	6	4	3	5	5	4	4	6	6	5	6	5	6	3	5	5	6	5	4	3	6	3	6	4	5	3	4	4	5	3	5	5	5	6	5	3	3	4
IDX44	TATAAT	5	5	5	5	6	3	4	5	3	3	5	5	4	5	6	6	5	6	4	6	5	4	5	4	3	5	4	3	5	5	3	5	5	4	3	5	3	5	5	5	4	4	3
IDX45	TCATTC	6	4	3	4	3	5	4	4	6	4	4	5	6	4	5	3	5	5	6	5	5	6	5	5	5	5	6	5	4	6	6	5	6	5	4	4	6	5	3	6	5	3	4	5
IDX46	TCCCGA	5	5	4	3	5	4	6	3	5	4	5	5	4	6	5	5	6	3	5	6	6	6	5	5	5	5	5	6	4	3	5	4	6	5	6	4	6	6	6	3	5	5	3	5	4
IDX47	TCGAAG	4	6	5	5	4	3	4	5	4	4	5	6	5	6	5	4	4	6	3	5	5	4	4	5	4	4	6	3	6	5	5	6	4	6	6	4	3	6	5	5	5	4	4	3	4	4
IDX48	TCGGCA	5	6	4	3	4	5	5	4	6	4	6	4	5	5	3	3	5	6	4	3	5	5	5	6	4	5	5	6	5	6	5	4	3	5	6	3	5	4	6	5	5	4	5	5	4	3	3

## Sheet: OTHER-EDITTAG 6nt-Edit
Pairwise edit distance between 61 tags of putative, minimum, pairwise edit distance three, designed using EDITTAG. The minimum, pairwise edit distance of the set is three.
	TATGCG	AACACC	AACCAG	AACGGA	AAGAGG	AAGCCT	AAGGTC	AATCGC	ACAACG	ACCGAT	ACCTCA	ACGCAA	ACGTGT	ACTCTG	AGAAGC	AGCATG	AGCTAC	AGGACA	AGTGAG	ATGTCC	CAACTC	CAAGCA	CAATGG	CACAGT	CAGGAT	CCATAC	CCGTTA	CCTAAG	CCTTCT	CGAGTT	CGTAGA	CGTCAT	CTACCT	CTCACA	CTGAAC	CTTGGT	GAACGT	GACTTC	GAGTCA	GATGAC	GCACTA	GCCATT	GCTTGA	GGAGAA	GGATCT	GTAACC	GTACAG	GTCGTA	GTGCTT
AACACC	4
AACCAG	4	3
AACGGA	4	3	3
AAGAGG	4	3	3	3
AAGCCT	4	3	3	4	3
AAGGTC	4	3	4	3	3	3
AATCGC	3	3	3	3	3	3	3
ACAACG	4	3	3	4	3	4	5	3
ACCGAT	5	4	3	3	4	4	4	4	4
ACCTCA	5	3	3	3	5	4	4	4	3	3
ACGCAA	4	4	3	3	4	3	4	4	4	3	3
ACGTGT	4	5	4	3	3	3	3	4	4	3	3	3
ACTCTG	4	4	3	4	4	4	4	3	3	4	3	3	3
AGAAGC	4	3	4	4	3	4	3	3	3	5	5	4	4	5
AGCATG	4	3	3	4	3	3	4	4	3	3	4	3	3	3	3
AGCTAC	5	3	3	4	5	4	3	4	3	3	3	3	4	4	3	3
AGGACA	4	3	4	4	3	3	3	5	3	4	3	3	4	5	3	3	3
AGTGAG	3	5	3	4	3	5	4	4	4	3	4	4	3	3	3	3	3	3
ATGTCC	3	3	5	5	4	3	3	3	4	5	3	4	3	4	4	5	3	3	4
CAACTC	5	3	4	4	5	4	3	3	3	5	3	5	5	4	4	4	3	5	6	4
CAAGCA	3	4	3	3	4	3	4	4	3	5	4	3	5	5	3	4	4	3	5	4	3
CAATGG	3	5	4	3	3	5	4	3	3	5	5	6	4	4	4	4	5	6	3	5	3	3
CACAGT	5	3	3	3	3	4	4	4	4	3	5	4	3	4	4	4	5	5	5	5	3	3	3
CAGGAT	4	5	4	3	4	3	3	5	5	3	5	4	4	5	4	3	4	3	3	5	4	3	4	3
CCATAC	4	4	5	5	5	5	5	4	3	4	4	4	4	5	4	4	3	5	5	4	3	4	3	4	4
CCGTTA	6	6	6	4	5	5	4	6	5	3	3	3	3	4	6	5	4	4	4	4	4	4	4	4	4	3
CCTAAG	4	5	4	5	4	6	6	5	3	4	3	4	5	3	4	4	4	5	3	6	5	4	4	4	4	3	3
CCTTCT	4	5	6	6	6	4	5	5	4	4	3	5	3	3	6	5	4	5	5	4	4	4	4	4	4	3	3	3
CGAGTT	5	6	5	5	4	4	4	6	5	4	6	5	3	5	4	4	5	5	4	5	3	3	4	3	3	4	3	5	4
CGTAGA	5	5	5	4	4	6	6	4	5	5	4	3	3	5	3	4	4	3	3	5	5	3	4	3	4	4	3	3	4	3
CGTCAT	5	5	4	5	6	4	5	4	5	4	3	3	3	4	5	3	4	4	3	4	4	4	5	3	3	4	3	3	3	3	3
CTACCT	4	4	4	5	6	3	5	5	4	4	4	5	5	4	5	5	4	5	6	4	3	3	4	3	4	4	5	4	3	3	4	3
CTCACA	5	3	4	4	5	5	6	4	4	5	3	3	6	4	5	4	4	3	5	4	4	3	5	3	5	3	4	4	4	5	3	3	3
CTGAAC	5	4	5	5	4	5	4	5	4	4	5	4	5	5	3	5	4	4	4	3	4	4	5	4	3	3	4	3	5	4	4	4	3	3
CTTGGT	4	6	6	4	5	5	4	4	5	4	5	6	3	4	5	5	6	6	4	5	5	4	3	3	3	5	4	4	3	3	3	3	3	4	4
GAACGT	4	4	4	3	4	3	3	3	3	3	5	5	4	5	3	4	5	4	5	5	3	4	3	3	4	5	5	5	5	4	4	4	3	5	4	4
GACTTC	4	3	4	4	5	4	3	4	4	5	3	5	4	3	4	4	3	5	5	4	3	5	4	4	5	4	4	5	3	3	6	4	4	5	5	5	3
GAGTCA	4	4	4	4	4	3	3	4	5	5	3	4	4	4	4	4	4	3	3	3	4	3	4	5	4	5	3	5	4	3	4	3	5	4	5	6	4	3
GATGAC	3	4	4	4	4	4	3	3	4	4	5	4	5	5	3	4	3	3	3	3	4	4	4	5	3	3	5	4	5	4	4	4	5	4	3	4	4	3	3
GCACTA	6	4	4	4	6	4	5	5	4	4	3	3	5	3	5	3	4	3	5	6	3	4	4	4	4	3	3	4	4	4	4	4	4	3	5	6	3	3	3	4
GCCATT	6	4	4	5	5	4	5	6	4	3	4	4	4	4	5	3	4	5	5	6	4	5	4	3	5	3	3	4	3	3	5	3	4	4	5	5	4	3	5	5	3
GCTTGA	5	6	5	4	5	5	6	4	5	4	3	4	3	3	5	3	4	5	4	5	6	4	4	5	4	4	3	4	3	5	3	4	5	4	4	3	4	3	3	3	3	4
GGAGAA	5	5	5	4	4	5	5	6	5	4	5	4	5	6	4	5	4	3	3	6	5	3	5	5	4	4	5	5	6	3	3	4	5	5	4	5	4	5	3	3	3	5	4
GGATCT	4	5	5	6	5	4	4	4	4	5	4	6	4	4	4	4	4	3	5	4	4	4	4	5	4	4	5	6	3	3	5	3	3	5	4	5	3	4	3	4	3	3	4	3
GTAACC	4	3	4	5	5	4	5	4	3	6	5	5	6	6	3	5	4	4	4	3	3	4	5	5	6	4	5	4	5	5	4	4	3	3	3	5	3	4	4	3	4	4	5	4	3
GTACAG	4	4	3	4	4	5	6	5	4	5	5	4	5	4	4	4	4	3	3	5	4	4	4	3	5	4	5	3	5	5	3	3	3	3	4	5	3	4	4	4	3	4	4	3	4	3
GTCGTA	5	5	5	3	6	5	4	4	6	4	4	4	4	4	5	4	4	5	4	4	5	4	6	4	5	4	3	5	5	4	3	3	4	3	4	4	3	3	3	4	3	3	3	3	4	4	4
GTGCTT	4	6	5	6	5	3	4	5	6	5	5	4	4	4	5	4	4	5	4	4	4	5	6	5	4	6	4	6	4	3	5	3	3	5	4	4	3	3	4	4	3	3	4	5	3	4	3	3
GTTAGG	4	5	5	5	3	6	5	4	4	6	6	6	5	4	4	4	4	5	3	5	6	5	4	4	5	5	4	3	5	5	3	4	5	4	4	3	4	5	5	4	5	4	3	4	5	3	3	4	4
GTTCCA	4	5	4	5	6	4	5	4	5	5	4	4	6	4	5	6	4	4	5	3	5	4	6	6	6	5	4	5	4	6	4	4	3	3	5	4	4	4	3	4	3	4	3	4	4	3	3	3	3
TCAGAG	3	5	4	4	3	5	5	5	3	3	5	4	4	4	4	4	5	5	3	6	5	4	4	3	3	3	5	3	5	4	4	5	5	3	4	5	5	6	5	4	4	5	4	3	5	5	3	4	6
TCCTTG	4	5	4	5	5	5	5	5	4	4	3	5	4	3	6	3	4	6	5	5	5	6	4	5	6	4	3	3	3	5	4	5	4	5	6	4	5	3	5	6	4	3	3	6	5	6	4	4	3
TCGACT	4	4	5	5	4	3	5	4	3	3	4	4	3	4	5	5	4	3	5	4	3	4	5	4	4	4	4	4	3	3	4	3	3	3	4	4	4	4	4	4	3	3	5	5	3	4	5	4	4
TCTAGC	3	4	4	5	4	5	5	3	4	5	5	5	4	4	3	5	3	5	4	4	4	3	4	4	5	3	5	3	4	4	3	5	3	4	3	4	5	4	5	4	5	4	3	5	5	4	4	4	5
TGACCA	4	4	3	4	5	4	5	5	4	4	4	4	6	5	4	5	4	3	5	3	4	3	5	5	5	5	5	6	5	4	4	4	3	3	3	6	4	4	3	4	3	4	5	3	3	3	4	4	4
TGGAAG	4	5	4	5	3	5	5	6	4	5	6	4	5	5	3	3	4	3	3	5	6	5	5	5	4	5	5	3	6	5	4	4	6	5	3	5	4	6	5	5	5	5	5	3	4	4	3	4	5
TGGTGA	4	6	6	4	4	5	4	5	6	5	4	4	3	5	4	4	4	3	3	4	6	5	4	5	4	5	3	5	5	4	3	4	6	5	5	4	5	5	3	3	5	6	3	3	4	5	5	3	4
TGTGTC	3	5	6	5	5	5	3	4	6	5	5	6	3	4	4	4	4	4	3	3	4	5	5	5	5	5	4	5	4	3	4	4	5	5	4	4	5	4	3	3	5	5	5	4	4	4	5	3	3
TTCCGT	3	5	4	4	5	4	5	4	5	3	5	5	4	4	5	5	5	6	5	4	5	6	5	3	5	5	4	5	4	5	5	4	3	4	5	3	3	5	6	6	5	4	5	6	5	5	4	3	3
TTGGCA	3	5	5	4	5	4	4	4	5	5	4	4	5	6	5	5	5	3	5	3	6	3	5	6	4	6	4	6	5	5	4	4	4	3	4	3	6	6	3	4	5	5	4	4	5	4	4	3	4
[truncated: 11 more columns]

## Sheet: OTHER-Meyer et al. 2008-Hamm
Pairwise Hamming distances between 52 sequence tags Meyer et al. 2008. The minimum expected Hamming distance of the set is three. The minimum observed Hamming distance of the set is three.
	TGACGTG	ACAGCTG	AGCACTG	TACTATG	TCTGATG	ATGCATG	ACTGTCG	TACGTCG	TGTCTCG	AGCTGCG	TCATGCG	TATAGCG	ACGAGCG	ATCGACG	TGAGACG	TAGCACG	ACACACG	AGAGTAG	TCACTAG	TAGATAG	ATGTGAG	AGTCGAG	TGCAGAG	TCGTCAG	TGTGCAG	TCGTGTC	TGCTCTC	AGATATC	TATCATC	TGAGTGC	TCGATGC	TAGTCGC	ACTGCGC	TGTACGC	ACGTAGC	TACGAGC	ATAGAGC	AGTCAGC	TCACAGC	TATGTAC	ATGCTAC	AGTATAC	TGATGAC	TAGCGAC	ACACGAC	TCTAGAC	ATCAGAC	ATATCAC	AGCGCAC
ACAGCTG	4
AGCACTG	4	3
TACTATG	4	5	4
TCTGATG	4	3	5	3
ATGCATG	4	4	4	4	4
ACTGTCG	6	3	5	6	3	5
TACGTCG	5	5	5	3	4	6	3
TGTCTCG	3	6	5	5	4	5	3	3
AGCTGCG	4	5	3	4	6	5	4	4	4
TCATGCG	3	4	6	4	4	6	4	4	4	3
TATAGCG	4	6	5	4	4	6	4	3	3	4	3
ACGAGCG	5	4	4	6	5	4	3	5	5	3	3	3
ATCGACG	6	4	4	4	4	3	3	3	5	3	5	5	4
TGAGACG	3	4	5	4	3	5	4	3	3	4	3	4	5	3
TAGCACG	4	6	6	3	4	3	5	3	3	5	4	3	4	4	3
ACACACG	4	3	5	5	4	3	3	5	4	4	3	5	3	3	3	3
AGAGTAG	4	3	4	6	5	5	3	4	4	4	5	6	5	4	3	6	4
TCACTAG	3	4	6	5	4	5	4	4	3	6	3	5	5	6	4	4	3	3
TAGATAG	5	6	5	4	5	5	5	3	4	6	5	3	4	6	5	3	6	4	3
ATGTGAG	5	5	5	5	6	3	5	6	6	3	4	5	3	4	6	5	5	4	5	4
AGTCGAG	3	5	4	6	5	4	4	6	3	3	5	4	4	5	5	5	4	3	4	5	3
TGCAGAG	3	6	3	4	5	6	6	4	4	3	4	3	4	5	4	5	6	4	4	3	4	3
TCGTCAG	5	4	5	4	4	5	5	5	5	5	3	5	4	6	5	4	5	5	3	3	3	5	4
TGTGCAG	4	4	4	5	3	6	4	4	3	5	5	4	6	5	3	5	6	3	4	4	5	3	3	3
TCGTGTC	4	5	6	4	4	5	6	6	6	5	3	5	4	7	6	5	6	7	5	5	4	6	5	3	6
TGCTCTC	4	5	3	3	5	6	7	5	5	4	5	6	7	6	5	6	7	6	6	6	6	6	4	4	4	3
AGATATC	4	4	4	4	5	4	6	7	6	4	5	7	6	5	4	6	4	4	6	7	5	5	6	6	6	4	3
TATCATC	4	6	6	3	3	4	6	5	4	7	6	4	7	6	5	3	5	7	5	5	7	5	6	6	5	4	4	4
TGAGTGC	4	5	6	6	5	7	5	4	4	6	5	6	7	6	3	6	6	3	4	5	7	6	5	6	4	5	4	4	5
TCGATGC	6	6	6	6	5	6	5	5	5	7	5	5	4	7	6	5	6	6	4	3	6	7	5	4	6	3	5	6	5	3
TAGTCGC	6	6	6	4	6	6	7	5	6	6	5	5	6	7	6	4	7	7	6	4	5	7	6	3	5	3	3	5	4	4	3
ACTGCGC	7	3	5	7	4	6	3	6	6	6	6	6	5	5	6	7	5	5	6	7	6	5	7	5	4	5	5	5	5	4	4	4
TGTACGC	5	6	4	6	5	7	6	6	4	6	6	4	6	7	5	6	7	6	6	5	7	5	4	5	3	5	3	5	4	3	3	3	3
ACGTAGC	7	5	6	5	5	4	5	7	7	5	5	7	4	5	6	5	4	6	6	6	4	6	7	4	7	3	5	3	5	5	3	3	3	5
TACGAGC	6	6	6	3	4	6	6	3	6	6	6	5	7	4	4	4	6	6	6	5	7	7	5	6	5	5	4	5	3	3	4	3	4	4	4
ATAGAGC	6	4	6	6	5	4	5	6	7	6	6	7	6	3	4	6	4	4	6	7	5	6	7	7	6	6	6	3	5	3	5	5	3	5	3	3
AGTCAGC	5	6	5	6	5	4	5	7	4	5	7	6	6	5	5	5	4	5	6	7	6	3	6	7	5	6	5	3	3	4	5	5	3	3	3	4	3
TCACAGC	4	5	7	5	4	5	6	6	5	7	4	6	6	6	4	4	3	6	3	6	7	6	6	5	6	4	5	4	3	3	3	4	4	4	3	3	3	3
TATGTAC	6	6	7	5	4	7	4	3	4	7	6	4	7	6	5	5	7	4	4	3	6	5	5	5	3	5	5	6	3	3	4	4	4	4	6	3	5	5	5
ATGCTAC	6	6	6	7	7	3	5	6	5	6	7	7	5	5	7	5	5	4	4	4	3	4	6	5	6	5	6	5	5	5	4	5	5	6	4	6	4	4	5	4
AGTATAC	6	6	4	7	6	6	4	6	4	5	7	5	5	6	6	7	6	3	5	4	5	3	4	6	4	6	5	4	5	4	4	6	4	3	5	6	5	3	6	3	3
TGATGAC	3	6	6	5	6	7	7	6	5	4	3	5	6	7	4	6	6	4	4	5	4	4	3	4	4	3	3	3	5	3	5	4	6	4	5	5	5	5	4	4	5	4
TAGCGAC	4	7	7	5	6	5	7	5	5	6	5	4	5	7	6	3	6	6	4	3	4	4	4	4	5	3	5	6	3	5	4	3	6	5	5	4	6	5	4	3	3	5	3
ACACGAC	4	4	6	7	6	5	5	7	6	5	4	6	4	6	6	6	3	4	3	6	4	3	5	5	6	4	6	4	5	5	5	6	4	6	4	6	4	4	3	5	3	4	3	3
TCTAGAC	5	6	6	6	4	7	5	6	5	6	4	3	4	7	6	6	6	6	4	4	5	4	3	4	4	3	5	6	4	5	3	5	4	3	5	5	6	5	4	3	5	3	3	3	3
ATCAGAC	6	6	4	6	7	5	6	6	7	4	6	5	4	4	7	7	6	5	6	5	3	4	3	6	6	5	5	5	6	6	5	6	5	5	5	5	4	5	6	5	3	3	4	4	3	3
ATATCAC	6	4	5	6	7	5	6	7	7	5	5	7	6	5	6	7	5	4	5	6	3	5	6	4	5	5	4	3	6	5	6	4	4	5	4	6	3	5	5	5	3	4	3	5	3	5	3
AGCGCAC	6	4	3	6	6	6	5	5	6	4	7	7	6	4	5	7	6	3	6	6	5	4	4	5	3	6	3	4	6	4	6	5	3	4	5	4	4	4	6	4	4	3	4	5	4	5	3	3
TCAGCAC	5	3	6	6	4	7	5	5	6	7	4	6	6	6	4	6	5	4	3	5	6	6	5	3	3	4	4	5	5	3	4	4	3	4	5	4	4	6	3	3	5	5	3	4	3	3	5	3	3
ACGACAC	7	4	4	7	6	5	5	7	7	6	6	6	3	6	7	6	5	5	5	4	4	5	5	3	5	4	5	5	6	6	3	4	3	4	3	6	5	5	5	5	3	3	5	4	3	3	3	3	3
TACACAC	6	6	4	4	6	7	7	4	6	6	6	4	6	6	6	5	7	6	5	3	6	6	3	4	4	5	3	6	4	5	4	3	5	3	6	3	6	6	5	3	5	4	4	3	5	3	3	4	3
[truncated: 2 more columns]

[truncated: 6 more sheets: OTHER-Meyer et al. 2008-Edit, OTHER-IlluminaTruseq-Edit, OTHER-Barcrawl-Hamming, OTHER-Hamady-First80-Edit, OTHER-Hamady-First 80-Hamm, OTHER-Hamady-First80-16b-Hamm]
