# Supplementary material
Source: publisher figshare collection journal article supplement (https://plos.figshare.com/articles/dataset/_/121383)
Supplement: Supplementary file 1 [file 1 › File_S7.txt]

# This is a python configuration file formatted for use with edittag.
# You can validate tags within this file using something similar to:
#
# python validate_edit_metric_tags.py \
#    --input supplementary-file-1.txt \
#    --section "4nt ed3" \
#    --verbose
#
# We designed the edit metric tags below by running the following for
# increasing tags lengths [4,5,6,7,8,9,10] nucleotides:
#
# design_edit_metric_tags.py --tag-length=5 \
#   --edit-distance=3 \
#   --no-polybase \
#   --gc \
#   --comp \
#   --min-and-greater
#
# Any content within this file is available for use under a 
# Creative Commons Attribution 3.0 United States License:
#
# [1]: http://creativecommons.org/licenses/by/3.0/us/
#
# You can find the computer code used to generate these sequence tags
# at:
#
# https://github.com/faircloth-lab/edittag/

[4nt ed3]
Tag0:GTCA
Tag1:AACC
Tag2:ACAG
Tag3:AGGA
Tag4:CCTA
Tag5:CGAT
Tag6:TGTG

[5nt ed3]
Tag0:TGCAT
Tag1:AACAC
Tag2:AAGCG
Tag3:ACAAG
Tag4:ACCGA
Tag5:ACGTC
Tag6:AGACT
Tag7:AGGAA
Tag8:AGTGG
Tag9:ATCTG
Tag10:ATTCC
Tag11:CAATC
Tag12:CACCT
Tag13:CATGA
Tag14:CCACA
Tag15:CCTAT
Tag16:CGGTT
Tag17:CTAGG
Tag18:GAAGT
Tag19:GCTTA
Tag20:GGATG
Tag21:GGTAC
Tag22:GTCAA
Tag23:TCAGC
Tag24:TTGAC

[5nt ed4]
Tag0:TTGAC
Tag1:AACAG
Tag2:ACGCT
Tag3:CAATC
Tag4:CCTAA
Tag5:GAGGA
Tag6:GGTTG

[6nt ed3]
Tag0:TATGCG
Tag1:AACACC
Tag2:AACCAG
Tag3:AACGGA
Tag4:AAGAGG
Tag5:AAGCCT
Tag6:AAGGTC
Tag7:AATCGC
Tag8:ACAACG
Tag9:ACCGAT
Tag10:ACCTCA
Tag11:ACGCAA
Tag12:ACGTGT
Tag13:ACTCTG
Tag14:AGAAGC
Tag15:AGCATG
Tag16:AGCTAC
Tag17:AGGACA
Tag18:AGTGAG
Tag19:ATGTCC
Tag20:CAACTC
Tag21:CAAGCA
Tag22:CAATGG
Tag23:CACAGT
Tag24:CAGGAT
Tag25:CCATAC
Tag26:CCGTTA
Tag27:CCTAAG
Tag28:CCTTCT
Tag29:CGAGTT
Tag30:CGTAGA
Tag31:CGTCAT
Tag32:CTACCT
Tag33:CTCACA
Tag34:CTGAAC
Tag35:CTTGGT
Tag36:GAACGT
Tag37:GACTTC
Tag38:GAGTCA
Tag39:GATGAC
Tag40:GCACTA
Tag41:GCCATT
Tag42:GCTTGA
Tag43:GGAGAA
Tag44:GGATCT
Tag45:GTAACC
Tag46:GTACAG
Tag47:GTCGTA
Tag48:GTGCTT
Tag49:GTTAGG
Tag50:GTTCCA
Tag51:TCAGAG
Tag52:TCCTTG
Tag53:TCGACT
Tag54:TCTAGC
Tag55:TGACCA
Tag56:TGGAAG
Tag57:TGGTGA
Tag58:TGTGTC
Tag59:TTCCGT
Tag60:TTGGCA

[6nt ed4]
Tag0:TGTAGC
Tag1:AACACC
Tag2:AAGCGA
Tag3:ACAAGG
Tag4:ACCGTT
Tag5:AGTCCT
Tag6:CACTTG
Tag7:CATGAC
Tag8:CCACAA
Tag9:CGGAAT
Tag10:GCATCT
Tag11:GGCTAA
Tag12:GTGATG
Tag13:GTTGGA
Tag14:TTCCAC

[6nt ed5]
Tag0:TGTACG
Tag1:AACAGC
Tag2:AGGCTA
Tag3:CCATTG
Tag4:CTCGAA

[7nt ed3]
Tag0:TGACTGA
Tag1:AACAACC
Tag2:AACACAG
Tag3:AACAGGA
Tag4:AACCGAC
Tag5:AACCTCA
Tag6:AACGAGT
Tag7:AACGTTC
Tag8:AACTCCT
Tag9:AACTGTG
Tag10:AAGAAGG
Tag11:AAGACCA
Tag12:AAGCACT
Tag13:AAGCGTA
Tag14:AAGCTGC
Tag15:AAGGAAC
Tag16:AAGGCTT
Tag17:AAGGTCG
Tag18:AAGTGGT
Tag19:AATACGC
Tag20:AATGGAG
Tag21:AATTGCC
Tag22:ACAACGA
Tag23:ACAAGCT
Tag24:ACACATC
Tag25:ACAGTAC
Tag26:ACATAGG
Tag27:ACCAATG
Tag28:ACCGCAA
Tag29:ACCGGTT
Tag30:ACCTAAC
Tag31:ACCTTCG
Tag32:ACGAGAA
Tag33:ACGATCC
Tag34:ACGCCAT
Tag35:ACGGTGA
Tag36:ACGTCTA
Tag37:ACTACCG
Tag38:ACTCACA
Tag39:ACTCTGG
Tag40:ACTGAGC
Tag41:AGAACAC
Tag42:AGAATCG
Tag43:AGACCGT
Tag44:AGAGGAT
Tag45:AGATGCA
Tag46:AGCATGT
Tag47:AGCCAGA
Tag48:AGCGAAG
Tag49:AGCTCTC
Tag50:AGGACTG
Tag51:AGGCTAA
Tag52:AGGTACC
Tag53:AGGTTGG
Tag54:AGTAGTC
Tag55:AGTCAAC
Tag56:AGTCGCT
Tag57:AGTTCAG
Tag58:ATAAGGC
Tag59:ATAGACG
Tag60:ATCCTAG
Tag61:ATCGGCA
Tag62:ATCTCGA
Tag63:ATGTCCG
Tag64:ATGTGAC
Tag65:ATTCCTC
Tag66:ATTGCGG
Tag67:CAACAGC
Tag68:CAACCAA
Tag69:CAACTCG
Tag70:CAAGATG
Tag71:CAAGGCA
Tag72:CAATGAC
Tag73:CACACGT
Tag74:CACATTG
Tag75:CACCTAT
Tag76:CACTAAG
Tag77:CACTTCC
Tag78:CAGAGTT
Tag79:CAGGAGA
Tag80:CAGTCAT
Tag81:CATCGGT
Tag82:CATGCCT
Tag83:CATGTGG
Tag84:CATTCTG
Tag85:CCAACAT
Tag86:CCAAGTA
Tag87:CCAGTGT
Tag88:CCATACC
Tag89:CCGAATC
Tag90:CCGATAG
Tag91:CCGCTTA
Tag92:CCGTTCT
Tag93:CCTATCA
Tag94:CCTCAAT
Tag95:CCTGGAA
Tag96:CCTTAGA
Tag97:CCTTGTC
Tag98:CGAAGGT
Tag99:CGACACA
Tag100:CGAGCTA
Tag101:CGATTGC
Tag102:CGCAATT
Tag103:CGCATAA
Tag104:CGCTGAT
Tag105:CGGTAGT
Tag106:CGTAACC
Tag107:CGTACGA
Tag108:CGTCCTT
Tag109:CGTGTAC
Tag110:CTAACGG
Tag111:CTACGCT
Tag112:CTACTAC
Tag113:CTAGGTC
Tag114:CTATGGA
Tag115:CTCAAGC
Tag116:CTCATCT
Tag117:CTCCATA
Tag118:CTCGTGA
Tag119:CTGGACT
Tag120:CTGGTTG
Tag121:CTGTCTC
Tag122:CTTAGCG
Tag123:CTTCCAG
Tag124:GAACCTG
Tag125:GAAGTAG
Tag126:GAATCCA
Tag127:GACAGAT
Tag128:GACATGC
Tag129:GACCATT
Tag130:GAGACTC
Tag131:GAGGTGT
Tag132:GAGTGAA
Tag133:GATCAAG
Tag134:GATCGTC
Tag135:GATTCAC
Tag136:GCAATGG
Tag137:GCACGAA
Tag138:GCACTCT
Tag139:GCAGTTA
Tag140:GCCACTA
Tag141:GCCGTAT
Tag142:GCGAACT
Tag143:GCGTGTT
Tag144:GCTAGAC
Tag145:GCTTATG
Tag146:GCTTCCT
Tag147:GGAATTC
Tag148:GGACGTT
Tag149:GGAGAAC
Tag150:GGATACG
Tag151:GGATCAT
Tag152:GGCAACA
Tag153:GGCCTTA
Tag154:GGTAAGG
Tag155:GGTCCAA
Tag156:GGTCTGT
Tag157:GGTGACT
Tag158:GGTGGTA
Tag159:GTAAGCA
Tag160:GTAGAGT
Tag161:GTATGTG
Tag162:GTCGATG
Tag163:GTCTACC
Tag164:GTCTTGG
Tag165:GTGACAA
Tag166:GTGCATC
Tag167:GTGTAGA
Tag168:GTTACGT
Tag169:GTTCGGA
Tag170:GTTCTCG
Tag171:GTTGCCA
Tag172:GTTGTTC
Tag173:TAACGCC
Tag174:TACAGCG
Tag175:TACGACA
Tag176:TACTCGC
Tag177:TAGAGAC
Tag178:TAGCTAG
Tag179:TATCCGG
Tag180:TATGCTC
Tag181:TCACCAC
Tag182:TCACGTG
Tag183:TCAGAAG
Tag184:TCAGCTT
Tag185:TCATGGC
Tag186:TCCACCT
Tag187:TCCAGTC
Tag188:TCCTCTG
Tag189:TCCTGCA
Tag190:TCGCAGA
Tag191:TCGGTTC
Tag192:TCGTCGT
Tag193:TCTCTCC
Tag194:TGAGTCC
Tag195:TGCCAAT
Tag196:TGCGGAA
Tag197:TGCTTAC
Tag198:TGGAAGC
Tag199:TGGAGTA
Tag200:TGGCATG
Tag201:TGGCTCT
Tag202:TGGTGAG
Tag203:TGTTGGT
Tag204:TTAGTGG
Tag205:TTCAGGT
Tag206:TTCGAAC
Tag207:TTCGCTA
Tag208:TTGATCG
Tag209:TTGCCTT
Tag210:TTGTGCT

[7nt ed4]
Tag0:TTGGTTC
Tag1:AACAACC
Tag2:AACCGAA
Tag3:AACGCTG
Tag4:AAGACGT
Tag5:AAGGTCA
Tag6:AATCAGG
Tag7:ACAAGAG
Tag8:ACACTTC
Tag9:ACCTAGT
Tag10:ACTGCAC
Tag11:AGAGTGG
Tag12:AGGATAC
Tag13:AGTACCA
Tag14:AGTTGTC
Tag15:ATGTGCT
Tag16:CAATCCT
Tag17:CAGCAAT
Tag18:CATTGGA
Tag19:CCAACTA
Tag20:CCATAAC
Tag21:CCTGATG
Tag22:CGAAGGT
Tag23:CGCCTTA
Tag24:CGTTCAG
Tag25:CTACTCG
Tag26:CTCGTAT
Tag27:CTGAGAA
Tag28:GACTGTT
Tag29:GATCTAC
Tag30:GCCACAT
Tag31:GGACAAG
Tag32:GGAGCTT
Tag33:GGTATTG
Tag34:GTAACGC
Tag35:GTGCATA
Tag36:TCACCGT
Tag37:TCCAGGA
Tag38:TCTTGCG
Tag39:TGGTAGA
Tag40:TTCCAAC

[7nt ed5]
Tag0:TGTGGTC
Tag1:AACAACC
Tag2:AAGCCGA
Tag3:ACACGTG
Tag4:ACGGAAT
Tag5:AGTTAGG
Tag6:CAATGCT
Tag7:CCTACAA
Tag8:CTCCTTC
Tag9:GGACTCA
Tag10:TTCGAGA

[7nt ed6]
Tag0:TGGTATC
Tag1:AACAACG
Tag2:AGTCGGA
Tag3:CCTTCCT

[8nt ed3]
Tag0:TTGAGCTC
Tag1:AACAACCG
Tag2:AACAAGGC
Tag3:AACACCAC
Tag4:AACACGCT
Tag5:AACACTGG
Tag6:AACAGCGA
Tag7:AACAGGTG
Tag8:AACAGTCC
Tag9:AACCACTC
Tag10:AACCAGAG
Tag11:AACCGAAC
Tag12:AACCGTGT
Tag13:AACCTACG
Tag14:AACGCACA
Tag15:AACGCCTT
Tag16:AACGTAGC
Tag17:AACTCGGA
Tag18:AACTGAGG
Tag19:AACTTGCC
Tag20:AAGACACC
Tag21:AAGACCGT
Tag22:AAGACGAG
Tag23:AAGAGGCA
Tag24:AAGCATCG
Tag25:AAGCCTGA
Tag26:AAGCGACT
Tag27:AAGCGTTC
Tag28:AAGCTCAC
Tag29:AAGCTGGT
Tag30:AAGGAAGG
Tag31:AAGGACCA
Tag32:AAGGAGAC
Tag33:AAGGCGTA
Tag34:AAGGCTCT
Tag35:AAGTCCTC
Tag36:AAGTGCAG
Tag37:AATCCAGC
Tag38:AATCGCTG
Tag39:AATGACGC
Tag40:AATGGTCG
Tag41:AATTCCGG
Tag42:ACAACAGC
Tag43:ACAACGTG
Tag44:ACAAGACG
Tag45:ACAAGCTC
Tag46:ACACCGAT
Tag47:ACACCTCA
Tag48:ACACGAGA
Tag49:ACACTACC
Tag50:ACACTCTG
Tag51:ACAGAGGT
Tag52:ACAGCAAG
Tag53:ACAGGCAT
Tag54:ACAGTGAC
Tag55:ACAGTTCG
Tag56:ACATGCCA
Tag57:ACATGGAG
Tag58:ACCAAGCA
Tag59:ACCATAGG
Tag60:ACCATCCT
Tag61:ACCATGTC
Tag62:ACCGAATG
Tag63:ACCGACAA
Tag64:ACCGCTAT
Tag65:ACCGGTTA
Tag66:ACCTAGAC
Tag67:ACCTCAGT
Tag68:ACCTCTTC
Tag69:ACCTTCGA
Tag70:ACGAACGA
Tag71:ACGAATCC
Tag72:ACGAGAAC
Tag73:ACGATCAG
Tag74:ACGCAGTA
Tag75:ACGCTTCT
Tag76:ACGGACTT
Tag77:ACGGTACA
Tag78:ACGTATGG
Tag79:ACGTCCAA
Tag80:ACGTCGTT
Tag81:ACTACGGT
Tag82:ACTATCGC
Tag83:ACTCAACG
Tag84:ACTCCTAC
Tag85:ACTCGATC
Tag86:ACTCTCCA
Tag87:ACTCTGAG
Tag88:ACTGCACT
Tag89:ACTGCGAA
Tag90:ACTGCTTG
Tag91:ACTGGTGT
Tag92:ACTTGGCT
Tag93:AGAACCAG
Tag94:AGAAGCCT
Tag95:AGAAGGAC
Tag96:AGAAGTGG
Tag97:AGACATGC
Tag98:AGACCTTG
Tag99:AGACGCTA
Tag100:AGAGACTC
Tag101:AGAGCAGA
Tag102:AGAGGATG
Tag103:AGAGTCCA
Tag104:AGATACGG
Tag105:AGATCGTC
Tag106:AGATTGCG
Tag107:AGCAGACA
Tag108:AGCCAACT
Tag109:AGCCGTAA
Tag110:AGCCTATC
Tag111:AGCGAGAT
Tag112:AGCGTGTA
Tag113:AGCTAAGC
Tag114:AGCTACCA
Tag115:AGCTAGTG
Tag116:AGCTTCAG
Tag117:AGGAACAC
Tag118:AGGAGGTT
Tag119:AGGATAGC
Tag120:AGGCAATG
Tag121:AGGCTGAA
Tag122:AGGTAGGA
Tag123:AGGTCAAC
Tag124:AGGTCTGT
Tag125:AGGTGTTG
Tag126:AGGTTCCT
Tag127:AGTACACG
Tag128:AGTATGCC
Tag129:AGTCAGGT
Tag130:AGTCGAAG
Tag131:AGTCTTGG
Tag132:AGTGACCT
Tag133:AGTGCATC
Tag134:AGTGGCAA
Tag135:AGTTCGCA
Tag136:AGTTGTGC
Tag137:ATAACGCC
Tag138:ATACGCAG
Tag139:ATACTGGC
Tag140:ATAGAGCG
Tag141:ATAGGTCC
Tag142:ATAGTCGG
Tag143:ATCATGCG
Tag144:ATCCACGA
Tag145:ATCCGTTG
Tag146:ATCCTTCC
Tag147:ATCGCAAC
Tag148:ATCGGAGA
Tag149:ATCGTCTC
Tag150:ATCGTGGT
Tag151:ATCTCCTG
Tag152:ATCTGACC
Tag153:ATGACAGG
Tag154:ATGAGTGC
Tag155:ATGCCTAG
Tag156:ATGCGCTT
Tag157:ATGCGTCA
Tag158:ATGGCGAT
Tag159:ATGTGGAC
Tag160:ATTAGCCG
Tag161:ATTCCGCT
Tag162:CAACACAG
Tag163:CAACCGTA
Tag164:CAACCTCT
Tag165:CAACGAGT
Tag166:CAACTCCA
Tag167:CAACTGAC
Tag168:CAACTTGG
Tag169:CAAGAAGC
Tag170:CAAGCCAA
Tag171:CAAGGTAC
Tag172:CAAGTCGT
Tag173:CAATAGCC
Tag174:CAATCAGG
Tag175:CAATGCGA
Tag176:CACACATC
Tag177:CACAGACT
Tag178:CACAGGAA
Tag179:CACATGGT
Tag180:CACCAGTT
Tag181:CACCATGA
Tag182:CACGATTC
Tag183:CACGCAAT
Tag184:CACGTCTA
Tag185:CACTGTAG
Tag186:CACTTCAC
Tag187:CAGAACTG
Tag188:CAGACGTT
Tag189:CAGAGTGA
Tag190:CAGATCCT
Tag191:CAGCATAC
Tag192:CAGCTAGA
Tag193:CAGGATGT
Tag194:CAGGTAAG
Tag195:CAGGTTCA
Tag196:CAGTCACA
Tag197:CAGTGCTT
Tag198:CATACGGA
Tag199:CATACTCG
Tag200:CATCAACC
Tag201:CATCACGT
Tag202:CATCCAAG
Tag203:CATCTGCT
Tag204:CATGAGCA
Tag205:CATGGATC
Tag206:CATGTGTG
Tag207:CATTCGTC
Tag208:CATTGACG
Tag209:CCAACACT
Tag210:CCAACGAA
Tag211:CCAACTTC
Tag212:CCAAGGTT
Tag213:CCAAGTAG
Tag214:CCACAACA
Tag215:CCACATTG
Tag216:CCACTAAG
Tag217:CCAGTATC
Tag218:CCAGTTGA
Tag219:CCATGAAC
Tag220:CCGAAGAT
Tag221:CCGATGTA
Tag222:CCGCTTAA
Tag223:CCGGAATA
Tag224:CCGTAACT
Tag225:CCGTTATG
Tag226:CCTAACAG
Tag227:CCTAAGTC
Tag228:CCTACCTA
Tag229:CCTAGAGA
Tag230:CCTATACC
Tag231:CCTATTGG
Tag232:CCTCATCT
Tag233:CCTCGAAT
Tag234:CCTCGTTA
Tag235:CCTGTCAA
Tag236:CCTTAGGT
Tag237:CCTTCCAT
Tag238:CCTTGGAA
Tag239:CGAACAAC
Tag240:CGAAGTCA
Tag241:CGAATACG
Tag242:CGAATTGC
Tag243:CGACACTT
Tag244:CGACCTAA
Tag245:CGAGAGAA
Tag246:CGAGTTAG
Tag247:CGATCGAT
Tag248:CGATGTTC
Tag249:CGATTCTG
Tag250:CGATTGGA
Tag251:CGCAACTA
Tag252:CGCAATGT
Tag253:CGCCTTAT
Tag254:CGCGTATT
Tag255:CGCTACAT
Tag256:CGCTGATA
Tag257:CGGAGTAT
Tag258:CGGATCAA
Tag259:CGGCATTA
Tag260:CGGTAATC
Tag261:CGGTTGTT
Tag262:CGTAGATG
Tag263:CGTATCTC
Tag264:CGTCAAGA
Tag265:CGTCCATT
Tag266:CGTCTAAC
Tag267:CGTCTTCA
Tag268:CGTGTGAT
Tag269:CTAACCTG
Tag270:CTAAGACC
Tag271:CTACAAGG
Tag272:CTACATCC
Tag273:CTAGCAGT
Tag274:CTAGCTCA
Tag275:CTAGGTTG
Tag276:CTATCCAC
Tag277:CTATGCCT
Tag278:CTCAAGCT
Tag279:CTCACCAA
Tag280:CTCAGAAG
Tag281:CTCCAATC
Tag282:CTCCTAGT
Tag283:CTCCTGAA
Tag284:CTCGAACA
Tag285:CTCGACTT
Tag286:CTCGGTAA
Tag287:CTCGTTCT
Tag288:CTCTATCG
Tag289:CTCTCAGA
Tag290:CTCTGGAT
Tag291:CTCTTGTC
Tag292:CTGAACGT
Tag293:CTGACTAC
Tag294:CTGATGAG
Tag295:CTGCCATA
Tag296:CTGGTCAT
Tag297:CTGTACCA
Tag298:CTGTATGC
Tag299:CTGTGGTA
Tag300:CTTACAGC
Tag301:CTTAGGAC
Tag302:CTTCACTG
Tag303:CTTCCTTC
Tag304:CTTCGCAA
Tag305:CTTCGGTT
Tag306:CTTGCTAG
Tag307:GAACCTTC
Tag308:GAACGAAG
Tag309:GAACGGTT
Tag310:GAACGTGA
Tag311:GAAGACTG
Tag312:GAAGATCC
Tag313:GAAGTGCT
Tag314:GAATCACC
Tag315:GAATCCGT
Tag316:GAATGGCA
Tag317:GACACAGT
Tag318:GACATCTC
Tag319:GACCGATA
Tag320:GACGAACT
Tag321:GACGTCAT
Tag322:GACTACGA
Tag323:GACTTGTG
Tag324:GAGAAGGT
Tag325:GAGACCAA
Tag326:GAGAGTAC
Tag327:GAGCAATC
Tag328:GAGCTCTA
Tag329:GAGGCATT
Tag330:GAGTAGAG
Tag331:GAGTGTGT
Tag332:GATACCTG
Tag333:GATAGCCA
Tag334:GATCAAGG
Tag335:GATCAGAC
Tag336:GATCCACT
Tag337:GATCTCAG
Tag338:GATCTTGC
Tag339:GATGCTAC
Tag340:GATGGAGT
Tag341:GATGTCGA
Tag342:GATTGTCC
Tag343:GCAACCAT
Tag344:GCAATGAG
Tag345:GCAATTCC
Tag346:GCACACAA
Tag347:GCAGAAGA
Tag348:GCATAACG
Tag349:GCATAGTC
Tag350:GCATCCTA
Tag351:GCATTGGT
Tag352:GCCAATAC
Tag353:GCCACTTA
Tag354:GCCAGAAT
Tag355:GCCTATGT
Tag356:GCCTTAAC
Tag357:GCCTTCTT
Tag358:GCGCATAT
Tag359:GCGTATCA
Tag360:GCGTTAGA
Tag361:GCTAAGGA
Tag362:GCTACAAC
Tag363:GCTACTCT
Tag364:GCTCAGTT
Tag365:GCTGAATC
Tag366:GCTGTAAG
Tag367:GCTTCACA
Tag368:GGAACATG
Tag369:GGAAGAGA
Tag370:GGAATGTC
Tag371:GGACAGAT
Tag372:GGACATCA
Tag373:GGACTACT
Tag374:GGAGGAAT
Tag375:GGAGTCTT
Tag376:GGATCTGA
Tag377:GGATGTAG
Tag378:GGATTCAC
Tag379:GGCAAGTT
Tag380:GGCATTCT
Tag381:GGCGAATA
Tag382:GGCTCAAT
Tag383:GGTAACGT
Tag384:GGTACGAA
Tag385:GGTACTTC
Tag386:GGTATAGG
Tag387:GGTCACTA
Tag388:GGTCGTAT
Tag389:GGTGATGA
Tag390:GGTGTACA
Tag391:GGTTAGCT
Tag392:GGTTGAAC
Tag393:GGTTGGTA
Tag394:GTAACCGA
Tag395:GTAAGCAC
Tag396:GTAAGGTG
Tag397:GTACACCT
Tag398:GTACCACA
Tag399:GTACGATC
Tag400:GTAGCGTA
Tag401:GTAGTACC
Tag402:GTATCGAG
Tag403:GTATTCCG
Tag404:GTCAACAG
Tag405:GTCAGTCA
Tag406:GTCATCGT
Tag407:GTCCTAAG
Tag408:GTCCTGTT
Tag409:GTCCTTGA
Tag410:GTCGAGAA
Tag411:GTCGATTG
Tag412:GTCGTTAC
Tag413:GTCTCATC
Tag414:GTCTGAGT
Tag415:GTCTGCAA
Tag416:GTGAATGG
Tag417:GTGAGACT
Tag418:GTGATCCA
Tag419:GTGGTATG
Tag420:GTGTCCTT
Tag421:GTGTGTTC
Tag422:GTTAAGCG
Tag423:GTTATGGC
Tag424:GTTCCATG
Tag425:GTTCTTCG
Tag426:GTTGCTGT
Tag427:GTTGGCAT
Tag428:TAACGTCG
Tag429:TAAGCGCA
Tag430:TAAGTGGC
Tag431:TACACACG
Tag432:TACAGAGC
Tag433:TACATCGG
Tag434:TACCGGAT
Tag435:TACCTGCA
Tag436:TACGACGT
Tag437:TACGGAAG
Tag438:TACGGTCT
Tag439:TACTAGCG
Tag440:TACTCCAG
Tag441:TACTGCTC
Tag442:TAGAACGC
Tag443:TAGCAGGA
Tag444:TAGCCATG
Tag445:TAGCTGAG
Tag446:TAGCTTCC
Tag447:TAGGAGCT
Tag448:TAGTCAGC
Tag449:TAGTCTCG
Tag450:TAGTGCCA
Tag451:TAGTGGTG
Tag452:TATCCTGG
Tag453:TATCGCGA
Tag454:TATGACCG
Tag455:TATGCGGT
Tag456:TATGGCAC
Tag457:TCAATCCG
Tag458:TCACCTAG
Tag459:TCACGATG
Tag460:TCACTCGA
Tag461:TCAGACAC
Tag462:TCAGCCTT
Tag463:TCAGTAGG
Tag464:TCATCTCC
Tag465:TCCAACTG
Tag466:TCCACGTT
Tag467:TCCAGCAA
Tag468:TCCATTGC
Tag469:TCCGATCA
Tag470:TCCTCATG
Tag471:TCCTGACT
Tag472:TCCTGGTA
Tag473:TCGAACCT
Tag474:TCGACAAG
Tag475:TCGAGAGT
Tag476:TCGATGAC
Tag477:TCGCTATC
Tag478:TCGGATTC
Tag479:TCGTCTGA
Tag480:TCGTGCAT
Tag481:TCTACGCA
Tag482:TCTAGGAG
Tag483:TCTAGTCC
Tag484:TCTGGACA
Tag485:TCTGTCGT
Tag486:TCTTACGG
Tag487:TCTTCGAC
Tag488:TGACAACC
Tag489:TGACCGTT
Tag490:TGAGACGA
Tag491:TGAGCTGT
Tag492:TGATAGGC
Tag493:TGATCACG
Tag494:TGCAAGAC
Tag495:TGCACTTG
Tag496:TGCCTCAA
Tag497:TGCGATAG
Tag498:TGCGTAAC
Tag499:TGCTCTAC
Tag500:TGCTGTGA
Tag501:TGCTTGCT
Tag502:TGGAAGCA
Tag503:TGGACCAT
Tag504:TGGATGGT
Tag505:TGGCTACA
Tag506:TGGCTCTT
Tag507:TGGTATCC
Tag508:TGGTGAAG
Tag509:TGGTTCGA
Tag510:TGTCACAC
Tag511:TGTCAGTG
Tag512:TGTCGACT
Tag513:TGTGGCTT
Tag514:TGTGTCAG
Tag515:TGTTCCGT
Tag516:TTACCGAC
Tag517:TTACGTGC
Tag518:TTAGGCGT
Tag519:TTCACGGA
Tag520:TTCCAGGT
Tag521:TTCCTCCT
Tag522:TTCGAAGC
Tag523:TTCGCCAT
Tag524:TTCGGCTA
Tag525:TTCGTACG
Tag526:TTGCAACG
Tag527:TTGCGAGA
Tag528:TTGCTTGG
Tag529:TTGGACTG
Tag530:TTGGTGCA

[8nt ed4]
Tag0:TTGTTCCG
Tag1:AACAACCG
Tag2:AACACGAC
Tag3:AACCAGGT
Tag4:AACCTCTC
Tag5:AACGGAAG
Tag6:AAGACTGG
Tag7:AAGAGGCA
Tag8:AAGGATCC
Tag9:AAGGCGTT
Tag10:AATCGCCT
Tag11:AATGCAGC
Tag12:ACAAGAGG
Tag13:ACAATGCC
Tag14:ACACCGTA
Tag15:ACACTCAG
Tag16:ACAGCACT
Tag17:ACCGAATC
Tag18:ACCGCTAA
Tag19:ACCTAGCA
Tag20:ACCTGTTG
Tag21:ACGCTTGT
Tag22:ACGTCAAC
Tag23:ACTGACGA
Tag24:ACTTCGGT
Tag25:AGAGTTCG
Tag26:AGCACATG
Tag27:AGCATGGA
Tag28:AGCTTACC
Tag29:AGGAACGT
Tag30:AGGTAGAG
Tag31:AGGTCCTA
Tag32:AGTGGTAC
Tag33:ATACGTGC
Tag34:ATATCCGG
Tag35:ATGCCACA
Tag36:ATGTTGGC
Tag37:ATTGGCTG
Tag38:CAACCTAG
Tag39:CAAGACCT
Tag40:CAAGGTGA
Tag41:CACTAGTC
Tag42:CACTTCCA
Tag43:CAGAACAC
Tag44:CAGTAAGG
Tag45:CAGTCGAA
Tag46:CCAACGAT
Tag47:CCAGTTAC
Tag48:CCATACTG
Tag49:CCGATGTA
Tag50:CCTATAGC
Tag51:CCTCATCT
Tag52:CCTGGAAT
Tag53:CGACAAGA
Tag54:CGACTCTT
Tag55:CGATATCC
Tag56:CGCCTTAA
Tag57:CGGAATTG
Tag58:CGTAGGTT
Tag59:CGTGCATA
Tag60:CTAAGCTC
Tag61:CTATGGAG
Tag62:CTCACAGT
Tag63:CTCGTGAT
Tag64:CTGGTTCA
Tag65:CTTAGTGG
Tag66:CTTCCTTC
Tag67:CTTCTCGA
Tag68:GAACTGCT
Tag69:GAATCACG
Tag70:GACCATAC
Tag71:GACTTGAG
Tag72:GAGAGAGT
Tag73:GATCGGTA
Tag74:GATGACTC
Tag75:GCAAGCAA
Tag76:GCGTTATG
Tag77:GCTATTCG
Tag78:GGACGTAT
Tag79:GGATTGTC
Tag80:GGCAATCT
Tag81:GGCTCAAT
Tag82:GGTCTACA
Tag83:GTACACCA
Tag84:GTCAGAAC
Tag85:GTGAAGGA
Tag86:GTGGTCTT
Tag87:GTGTAACC
Tag88:GTTCCAAG
Tag89:TACGGTCT
Tag90:TCATGCGT
Tag91:TCCAATGG
Tag92:TCCGTAGT
Tag93:TCCTTCAC
Tag94:TCGAACCA
Tag95:TCGCATTC
Tag96:TGAGGATG
Tag97:TGTCAGTG
Tag98:TGTGTGCT
Tag99:TTAACGCG
Tag100:TTCCGCTT
Tag101:TTCTGAGG
Tag102:TTGCGGAA

[8nt ed5]
Tag0:TGTGACGT
Tag1:AACAACCG
Tag2:AACCGAGA
Tag3:AACGCTTC
Tag4:AAGGTGGT
Tag5:ACAAGGAC
Tag6:ACCTCACT
Tag7:ACGGAATG
Tag8:ACTGCCAA
Tag9:AGATTCGC
Tag10:AGTCTGTG
Tag11:ATGTAGCC
Tag12:CAGAGCTA
Tag13:CATACAGG
Tag14:CCACTTAG
Tag15:CCTTGATC
Tag16:CGGTTACA
Tag17:CTAACTCC
Tag18:GATGGTCA
Tag19:GCCAAGTT
Tag20:GGAACCAT
Tag21:GTCCATAC
Tag22:TGGCAGAA
Tag23:TTCGTTGG

[8nt ed6]
Tag0:TTATGCCG
Tag1:AACAACGC
Tag2:AAGCGGAA
Tag3:ACCGTTCT
Tag4:AGGACTTG
Tag5:CCACCAAT
Tag6:CCTTAGGA
Tag7:GGTTGATC

[8nt ed7]
Tag0:TTGCGTCT
Tag1:AACAACCG
Tag2:AGGTTGGA

[9nt ed3]
Tag0:TTGTGGTAG
Tag1:AACAACACC
Tag2:AACAACCAG
Tag3:AACAACGGA
Tag4:AACAAGAGG
Tag5:AACAAGCCT
Tag6:AACAAGGTC
Tag7:AACAATCGC
Tag8:AACACAACG
Tag9:AACACCGAC
Tag10:AACACCTCA
Tag11:AACACGCAA
Tag12:AACACGTGC
Tag13:AACACTCTG
Tag14:AACACTGGT
Tag15:AACAGAAGC
Tag16:AACAGCATG
Tag17:AACAGGACA
Tag18:AACAGGTAG
Tag19:AACAGTTCC
Tag20:AACATCCGT
Tag21:AACATGGCG
Tag22:AACCAACTC
Tag23:AACCAAGCA
Tag24:AACCAATGG
Tag25:AACCACAGT
Tag26:AACCAGGAT
Tag27:AACCGACCT
Tag28:AACCGAGAC
Tag29:AACCGCGTA
Tag30:AACCGGTGT
Tag31:AACCGTAAG
Tag32:AACCTACGA
Tag33:AACCTAGTG
Tag34:AACCTATCC
Tag35:AACCTCAAC
Tag36:AACCTCGCT
Tag37:AACCTGCAG
Tag38:AACCTTGGC
Tag39:AACGAACGT
Tag40:AACGACTAC
Tag41:AACGAGTCA
Tag42:AACGATGAG
Tag43:AACGCACCA
Tag44:AACGCAGTT
Tag45:AACGCCAAG
Tag46:AACGCCTGT
Tag47:AACGCGATC
Tag48:AACGCTCAT
Tag49:AACGCTTCG
Tag50:AACGGACTG
Tag51:AACGGAGGA
Tag52:AACGTCAGA
Tag53:AACGTCCTC
Tag54:AACGTGGAA
Tag55:AACGTGTGG
Tag56:AACTACGCG
Tag57:AACTAGCAC
Tag58:AACTCAGGC
Tag59:AACTCCACT
Tag60:AACTCCTTG
Tag61:AACTCGGAG
Tag62:AACTGATCG
Tag63:AACTGCCGA
Tag64:AACTGGCTT
Tag65:AACTGTGCA
Tag66:AACTTCTGC
Tag67:AACTTGACC
Tag68:AAGAACCTC
Tag69:AAGAACTGG
Tag70:AAGAAGCGA
Tag71:AAGAAGTCC
Tag72:AAGACACAC
Tag73:AAGACAGCT
Tag74:AAGACCAGA
Tag75:AAGACCGTG
Tag76:AAGACGAAG
Tag77:AAGACTCCA
Tag78:AAGAGACCG
Tag79:AAGAGCCAT
Tag80:AAGAGGAGT
Tag81:AAGAGTGAC
Tag82:AAGATAGGC
Tag83:AAGATCACG
Tag84:AAGATGCTG
Tag85:AAGCATACC
Tag86:AAGCATCGG
Tag87:AAGCCACTA
Tag88:AAGCCATGC
Tag89:AAGCCGATT
Tag90:AAGCCGGAA
Tag91:AAGCCTTAG
Tag92:AAGCGAACA
Tag93:AAGCGAGGT
Tag94:AAGCGCTAA
Tag95:AAGCGGTTC
Tag96:AAGCGTCTT
Tag97:AAGCTAAGG
Tag98:AAGCTCGTC
Tag99:AAGCTGCCT
Tag100:AAGCTTCAC
Tag101:AAGGAAGAC
Tag102:AAGGAATCG
Tag103:AAGGACGCA
Tag104:AAGGAGCTT
Tag105:AAGGATTGC
Tag106:AAGGCAAGT
Tag107:AAGGCCTTC
Tag108:AAGGCGTAT
Tag109:AAGGCTGGA
Tag110:AAGGTAACC
Tag111:AAGGTACAG
Tag112:AAGGTCGGT
Tag113:AAGGTTGTG
Tag114:AAGTAGGTG
Tag115:AAGTCCAAC
Tag116:AAGTCGTGA
Tag117:AAGTCTGCG
Tag118:AAGTGACTC
Tag119:AAGTGAGAG
Tag120:AAGTGGCCA
Tag121:AAGTGTAGC
Tag122:AAGTTCCGG
Tag123:AAGTTGGAC
Tag124:AATACACGG
Tag125:AATACGACC
Tag126:AATAGCCGC
Tag127:AATAGCGAG
Tag128:AATCACTCC
Tag129:AATCAGACG
Tag130:AATCCAGCC
Tag131:AATCCGCAT
Tag132:AATCCGTGG
Tag133:AATCGCAGG
Tag134:AATCGGAAC
Tag135:AATCGGCGA
Tag136:AATCGTCCG
Tag137:AATCGTGTC
Tag138:AATGACGGC
Tag139:AATGCGCTG
Tag140:AATGCTGAC
Tag141:AATGGAGCG
Tag142:AATGGCACC
Tag143:AATGTGCGC
Tag144:AATTAGGCC
Tag145:AATTCCGTC
Tag146:AATTGCGGT
Tag147:AATTGGCAG
Tag148:AATTGGTGC
Tag149:ACAACAAGC
Tag150:ACAACACTG
Tag151:ACAACCACA
Tag152:ACAACCGAT
Tag153:ACAACCTTC
Tag154:ACAACGTAG
Tag155:ACAACTCCT
Tag156:ACAAGAACG
Tag157:ACAAGCAGT
Tag158:ACAAGGCAA
Tag159:ACAAGTCGG
Tag160:ACAAGTGCC
Tag161:ACAATCTCG
Tag162:ACAATGGAC
Tag163:ACACAAGTG
Tag164:ACACACAGA
Tag165:ACACACGCT
Tag166:ACACAGACC
Tag167:ACACATCAC
Tag168:ACACATTGG
Tag169:ACACCATCG
Tag170:ACACCGTGA
Tag171:ACACCTGTT
Tag172:ACACGAATC
Tag173:ACACGAGAA
Tag174:ACACGATGT
Tag175:ACACGCCTA
Tag176:ACACGGTAC
Tag177:ACACGTTCA
Tag178:ACACTACCA
Tag179:ACACTCAAG
Tag180:ACACTGCAT
Tag181:ACACTTAGC
Tag182:ACAGAAGGT
Tag183:ACAGACGAC
Tag184:ACAGACTTG
Tag185:ACAGAGCTA
Tag186:ACAGCAACT
Tag187:ACAGCAGAG
Tag188:ACAGCTATC
Tag189:ACAGCTCGA
Tag190:ACAGGATCC
Tag191:ACAGGTCAT
Tag192:ACAGGTGTA
Tag193:ACAGTATGG
Tag194:ACAGTCACC
Tag195:ACAGTCCTT
Tag196:ACAGTGAGT
Tag197:ACAGTGTTC
Tag198:ACAGTTGCT
Tag199:ACATAACCG
Tag200:ACATACTGC
Tag201:ACATCAGCA
Tag202:ACATCGCTC
Tag203:ACATCTAGG
Tag204:ACATCTTCC
Tag205:ACATGCCAC
Tag206:ACATGCGGA
Tag207:ACATGGAAG
Tag208:ACATGGCCT
Tag209:ACATTCGTG
Tag210:ACCAACCTA
Tag211:ACCAACTGT
Tag212:ACCAAGGAG
Tag213:ACCAATACG
Tag214:ACCACACAT
Tag215:ACCACGATA
Tag216:ACCACTAAC
Tag217:ACCACTTGA
Tag218:ACCAGAGTC
Tag219:ACCAGTCCA
Tag220:ACCATAAGG
Tag221:ACCATAGCT
Tag222:ACCATGTTG
Tag223:ACCATTCAG
Tag224:ACCGAACAA
Tag225:ACCGACATT
Tag226:ACCGAGTAT
Tag227:ACCGATAGA
Tag228:ACCGATCTC
Tag229:ACCGCAATG
Tag230:ACCGCATAC
Tag231:ACCGCTGAA
Tag232:ACCGGAAGT
Tag233:ACCGGATTA
Tag234:ACCGGTTCT
Tag235:ACCGTCGAT
Tag236:ACCTAACGC
Tag237:ACCTACTAG
Tag238:ACCTAGACA
Tag239:ACCTAGGTT
Tag240:ACCTCATCT
Tag241:ACCTCCAGA
Tag242:ACCTCGTAA
Tag243:ACCTCTGTC
Tag244:ACCTGCTCA
Tag245:ACCTGGATC
Tag246:ACCTGTGAG
Tag247:ACCTTAGGA
Tag248:ACCTTGCGT
Tag249:ACGAACTCA
Tag250:ACGAAGACT
Tag251:ACGAATAGC
Tag252:ACGAATGTG
Tag253:ACGACAGGA
Tag254:ACGACGCTT
Tag255:CAGCATTGT
Tag256:CAGCCAAGA
Tag257:CAGCCACAT
Tag258:CAGCCGTTA
Tag259:CAGCCTAAC
Tag260:CAGCGAATG
Tag261:CAGCGATAC
Tag262:CAGCGTCAA
Tag263:CAGCTAGAA
Tag264:CAGCTCAGT
Tag265:CAGCTCCTA
Tag266:CAGCTGGTT
Tag267:CAGCTGTAG
Tag268:CAGCTTACA
Tag269:CAGGAACAA
Tag270:CAGGAAGCT
Tag271:CAGGAATTC
Tag272:CAGGACTAG
Tag273:CAGGAGAAC
Tag274:CAGGAGGTA
Tag275:CAGGCATCA
Tag276:CAGGCCATT
Tag277:CAGGCTGAT
Tag278:CAGGTACGT
Tag279:CAGGTCTCT
Tag280:CAGGTGAGA
Tag281:CAGGTTAAG
Tag282:CAGTAACGC
Tag283:CAGTACACA
Tag284:CAGTACCTG
Tag285:CAGTAGAGG
Tag286:CAGTAGCAT
Tag287:CAGTATGAC
Tag288:CAGTATTCG
Tag289:CAGTCAATC
Tag290:CAGTCATAG
Tag291:CAGTCCGAA
Tag292:CAGTCGACT
Tag293:CAGTCTTGC
Tag294:CAGTGCTTA
Tag295:CAGTGTGGT
Tag296:CAGTTAGCC
Tag297:CAGTTCCAC
Tag298:CAGTTGTCA
Tag299:CATAACAGG
Tag300:CATAACCAC
Tag301:CATAAGCGT
Tag302:CATAAGGAG
Tag303:CATAATGCC
Tag304:CATACACCT
Tag305:CATACAGAC
Tag306:CATACCGCA
Tag307:CATACGATG
Tag308:CATACTCAG
Tag309:CATAGAACC
Tag310:CATAGACGA
Tag311:CATAGCCTT
Tag312:CATAGGTAC
Tag313:CATAGTGTG
Tag314:CATATCGGC
Tag315:CATCAACTG
Tag316:CATCAAGGC
Tag317:CATCACGTA
Tag318:CATCAGTCT
Tag319:CATCATCCA
Tag320:CATCCATGT
Tag321:CATCCTACG
Tag322:CATCCTCTC
Tag323:CATCCTGGA
Tag324:CATCGAGAG
Tag325:CATCGCAAT
Tag326:CATCGCTTG
Tag327:CATCGGACA
Tag328:CATCGTAGC
Tag329:CATCTACAC
Tag330:CATCTGATC
Tag331:CATCTTCGG
Tag332:CATGAATGG
Tag333:CATGACATC
Tag334:CATGCAGTG
Tag335:CATGCGTTC
Tag336:CATGGATCT
Tag337:CATGGCAGA
Tag338:CATGGTGCA
Tag339:CATGTAGGA
Tag340:CATGTCACG
Tag341:CATGTCCAT
Tag342:CATTACGCT
Tag343:CATTCCAAG
Tag344:CATTCGCCA
Tag345:CATTCGGAT
Tag346:CATTCTCGT
Tag347:CATTGACCG
Tag348:CATTGCGAC
Tag349:CATTGGCTC
Tag350:CATTGTTCC
Tag351:CCAACACAA
Tag352:CCAACAGCT
Tag353:CCAACATGG
Tag354:CCAACCATT
Tag355:CCAACGAAC
Tag356:CCAACGGTA
Tag357:CCAACTAGA
Tag358:CCAACTCTC
Tag359:CCAAGACGT
Tag360:CCAAGATCA
Tag361:CCAAGCAAG
Tag362:CCAAGGTTC
Tag363:CCAAGTGAA
Tag364:CCAATAACC
Tag365:CCAATAGTG
Tag366:CCAATCCAC
Tag367:CCAATGCCT
Tag368:CCAATTGGC
Tag369:CCACAACAG
Tag370:CCACAAGGA
Tag371:CCACAATCC
Tag372:CCACACTTA
Tag373:CCACAGAAT
Tag374:CCACATCGT
Tag375:CCACCAAGT
Tag376:CCACCTATG
Tag377:CCACCTTCT
Tag378:CCACGAGTT
Tag379:CCACGTTAG
Tag380:CCACTCACA
Tag381:CCACTGCTA
Tag382:CCACTGTGT
Tag383:CCAGAACCA
Tag384:CCAGACTAT
Tag385:CCAGAGAGA
Tag386:CCAGATAAG
Tag387:CCAGCAATA
Tag388:CCAGGATTG
Tag389:CCAGGTACA
Tag390:CCAGTACTC
Tag391:CCAGTCGTA
Tag392:CCAGTGGAT
Tag393:CCAGTTCAA
Tag394:CCATAAGTC
Tag395:CCATACACG
Tag396:CCATAGGCA
Tag397:CCATATCTG
Tag398:CCATCATAC
Tag399:CCATCCTCA
Tag400:CCATCTGAG
Tag401:CCATGAACT
Tag402:CCATTACGA
Tag403:CCATTCTTC
Tag404:CCATTGTCG
Tag405:CCGAACATC
Tag406:CCGAAGCTA
Tag407:CCGAAGGAT
Tag408:CCGAATACA
Tag409:CCGAATTAG
Tag410:CCGACCTAA
Tag411:CCGAGAATT
Tag412:CCGAGTAAC
Tag413:CCGAGTTGA
Tag414:CCGATATGC
Tag415:CCGATCAAT
Tag416:CCGATCTTG
Tag417:CCGATTCGT
Tag418:CCGCAACTT
Tag419:CCGCATGTA
Tag420:CCGCTAATC
Tag421:CCGCTTGAT
Tag422:CCGGAATGA
Tag423:CCGGCATAT
Tag424:CCGGTAGTT
Tag425:CCGGTGTAA
Tag426:CCGTAAGAA
Tag427:CCGTACAGT
Tag428:CCGTATCCT
Tag429:CCGTCAACA
Tag430:CCGTCTATT
Tag431:CCGTGACTA
Tag432:CCGTGATGT
Tag433:CCGTTAAGG
Tag434:CCGTTCTGA
Tag435:CCGTTGAAC
Tag436:CCGTTGCTT
Tag437:CCTAACCGA
Tag438:CCTAACGTG
Tag439:CCTAAGACC
Tag440:CCTAATGGT
Tag441:CCTACATTC
Tag442:CCTACCTGT
Tag443:CCTACGCAT
Tag444:CCTACTACT
Tag445:CCTAGAAGG
Tag446:CCTAGAGAT
Tag447:CCTAGCTTA
Tag448:CCTAGTTCG
Tag449:CCTATCGAA
Tag450:CCTATCTCC
Tag451:CCTATGTAG
Tag452:CCTCAAGCT
Tag453:CCTCACAAC
Tag454:CCTCAGATA
Tag455:CCTCATAGG
Tag456:CCTCCACTA
Tag457:CCTCCTTAA
Tag458:CCTCGGTAT
Tag459:CCTCGTCTT
Tag460:CCTCTAACG
Tag461:CCTCTATGA
Tag462:CCTCTTGTG
Tag463:CCTGACACA
Tag464:CCTGAGGAA
Tag465:CCTGATTAC
Tag466:CCTGCCAAT
Tag467:CCTGCTGTT
Tag468:CCTGGAGTA
Tag469:CCTGGTTGT
Tag470:CCTGTAAGC
Tag471:CCTTAACAC
Tag472:CCTTACTGG
Tag473:CCTTCAATG
Tag474:CCTTCAGGT
Tag475:CCTTCCGTA
Tag476:CCTTCTAGC
Tag477:CCTTGCATC
Tag478:CCTTGGCAA
Tag479:CCTTGTGCT
Tag480:CGAACAACA
Tag481:CGAACACTT
Tag482:CGAACAGAG
Tag483:CGAACCTAC
Tag484:CGAACGTCT
Tag485:CGAACTGGT
Tag486:CGAAGAAGC
Tag487:CGAAGAGTA
Tag488:CGAAGCCAA
Tag489:CGAAGCTTG
Tag490:CGAAGTACG
Tag491:CGAATCAGT
Tag492:CGAATCGCA
Tag493:CGAATGATC
Tag494:CGAATTCGG
Tag495:CGACAACCT
Tag496:CGACAAGAC
Tag497:CGACAATGG
Tag498:CGACAGGTT
Tag499:CGACAGTAA
Tag500:CGACATCTA
Tag501:CGACCAATC
Tag502:CGACCTCAT
Tag503:CGACCTTGA
Tag504:CGACGATAT
Tag505:ATAATCCGC
Tag506:ATACAGCCA
Tag507:ATACCACAC
Tag508:ATACCAGCT
Tag509:ATACCGACG
Tag510:ATACCGGTC
Tag511:ATACCTCGG
Tag512:ATACGAAGG
Tag513:ATACGCGTG
Tag514:ATACGCTCC
Tag515:ATACGGCAG
Tag516:ATACGTGAC
Tag517:ATACTTGCG
Tag518:ATAGACGCG
Tag519:ATAGAGAGC
Tag520:ATAGCACGT
Tag521:ATAGCCAGG
Tag522:ATAGCCTAC
Tag523:ATAGCGGAT
Tag524:ATAGCGTCA
Tag525:ATAGCTGGC
Tag526:ATAGGCACA
Tag527:ATAGGCTGT
Tag528:ATAGGTCCG
Tag529:ATAGTAGCC
Tag530:ATAGTGCGA
Tag531:ATATGCAGC
Tag532:ATATGGTGG
Tag533:ATCACACTC
Tag534:ATCACCTAG
Tag535:ATCACGGCT
Tag536:ATCAGCGAA
Tag537:ATCATGTCC
Tag538:ATCCAACAG
Tag539:ATCCAAGGT
Tag540:ATCCACCGA
Tag541:ATCCAGAAC
Tag542:ATCCAGTCG
Tag543:ATCCATCCT
Tag544:ATCCATTGC
Tag545:ATCCGACTA
Tag546:ATCCGGAGA
Tag547:ATCCGTACC
Tag548:ATCCGTGTT
Tag549:ATCCTCACA
Tag550:ATCCTCTTG
Tag551:ATCGAAGTC
Tag552:ATCGACCAT
Tag553:ATCGACTGG
Tag554:ATCGATGCA
Tag555:ATCGCAACC
Tag556:ATCGCCGTA
Tag557:ATCGCGAGT
Tag558:ATCGGATAG
Tag559:ATCGGCATC
Tag560:ATCGGTCAA
Tag561:ATCGTCTCT
Tag562:ATCGTGCTG
Tag563:ATCGTTACG
Tag564:ATCGTTGGT
Tag565:ATCTAGCGG
Tag566:ATCTCATGG
Tag567:ATCTCCGAT
Tag568:ATCTCCTCC
Tag569:ATCTCTAGC
Tag570:ATCTGACGT
Tag571:ATCTGAGCC
Tag572:ATCTGCAAG
Tag573:ATCTGGTAC
Tag574:ATCTTCCAC
Tag575:ATCTTGGCA
Tag576:ATGAACCGT
Tag577:ATGAACGAC
Tag578:ATGAAGCAG
Tag579:ATGACCTCT
Tag580:ATGACGGTA
Tag581:ATGACTACC
Tag582:ATGAGAGTG
Tag583:ATGAGATCC
Tag584:ATGAGCTGA
Tag585:ATGAGGAAC
Tag586:ATGAGGCCT
Tag587:ATGAGTGGT
Tag588:ATGATACGG
Tag589:ATGCACAAG
Tag590:ATGCACTTC
Tag591:ATGCAGGTT
Tag592:ATGCATGGA
Tag593:ATGCCAATC
Tag594:ATGCCGTTG
Tag595:ATGCCTAGT
Tag596:ATGCGCACT
Tag597:ATGCTAGAG
Tag598:ATGCTCCAA
Tag599:ATGCTGCTC
Tag600:ATGCTGTGT
Tag601:ATGGAACCA
Tag602:ATGGACCTG
Tag603:ATGGAGTAC
Tag604:ATGGCGCAA
Tag605:ATGGCTATG
Tag606:ATGGCTCCT
Tag607:ATGGTCAGC
Tag608:ATGGTGAAG
Tag609:ATGGTTGAC
Tag610:ATGTAAGGC
Tag611:ATGTACTCG
Tag612:ATGTCCGCA
Tag613:ATGTCGAGG
Tag614:ATGTCTCAC
Tag615:ATGTGCCTA
Tag616:ATGTGTCGG
Tag617:ATGTTGCCG
Tag618:ATTACAGCG
Tag619:ATTACCGGA
Tag620:ATTACGCAC
Tag621:ATTAGCCTG
Tag622:ATTAGGACG
Tag623:ATTCAACGC
Tag624:ATTCCACTG
Tag625:ATTCCGAGC
Tag626:ATTCCTTCG
Tag627:ATTCGCTAG
Tag628:ATTCGGCTT
Tag629:ATTCTCCGG
Tag630:ATTCTCGCC
Tag631:ATTCTGGTG
Tag632:ATTGCCGCT
Tag633:ATTGGAAGC
Tag634:ATTGGCCAC
Tag635:ATTGGTCGT
Tag636:ATTGTGACC
Tag637:CAACAGCGA
Tag638:CAACAGTTG
Tag639:CAACATGTC
Tag640:CAACCAGTA
Tag641:CAACCGCTT
Tag642:CAACGGAAG
Tag643:CAACGTGAT
Tag644:CAACTCGAC
Tag645:CAACTCTGG
Tag646:CAAGAAGAG
Tag647:CAAGACCTA
Tag648:CAAGACTGC
Tag649:CAAGAGACT
Tag650:CAAGATGGA
Tag651:CAAGGACAC
Tag652:CAAGGCATG
Tag653:CAAGTATCC
Tag654:CAAGTGGTC
Tag655:CAAGTTCTG
Tag656:CAATACCGT
Tag657:CAATCGGTG
Tag658:CAATCTGCC
Tag659:CAATGAGCA
Tag660:CAATGCCAG
Tag661:CAATGGAGT
Tag662:CAATGTCGA
Tag663:CAATTCACC
Tag664:CACAACGTT
Tag665:CACACTGAA
Tag666:CACAGATTC
Tag667:CACAGCTGT
Tag668:CACATACGG
Tag669:CACATGGTA
Tag670:CACATTCCT
Tag671:CACCACAAG
Tag672:CACCACTCA
Tag673:CACCATCTT
Tag674:CACCATTAC
Tag675:CACCGGTAA
Tag676:CACCGTACT
Tag677:CACGCTATA
Tag678:CACGGAGAT
Tag679:CACTAGTCC
Tag680:CACTCTTCA
Tag681:CACTGAAGA
Tag682:CACTGGAAC
Tag683:CACTGTCTG
Tag684:CACTTACTC
Tag685:CACTTAGAG
Tag686:CAGACTCTT
Tag687:CAGAGGATC
Tag688:CAGATCGAG
Tag689:CAGATGCAA
Tag690:ACGAGGATG
Tag691:ACGATCCGA
Tag692:ACGCAACGA
Tag693:ACGCACTAT
Tag694:ACGCCAGAT
Tag695:ACGCCTACA
Tag696:ACGCGATTG
Tag697:ACGCGTAAT
Tag698:ACGCTCTTA
Tag699:ACGCTTATG
Tag700:ACGGATCGT
Tag701:ACGGCCATA
Tag702:ACGGTAAGA
Tag703:ACGGTACCT
Tag704:ACGGTCTAC
Tag705:ACGTAATCC
Tag706:ACGTACATG
Tag707:ACGTACCAA
Tag708:ACGTAGTGT
Tag709:ACGTCACGT
Tag710:ACGTGCGTT
Tag711:ACGTTACAC
Tag712:ACGTTGTAG
Tag713:ACTAAGCTC
Tag714:ACTACGTCT
Tag715:ACTAGACCT
Tag716:ACTAGATGC
Tag717:ACTAGGAGA
Tag718:ACTATCGGT
Tag719:ACTATGCCG
Tag720:ACTATTCGC
Tag721:ACTCAAGAC
Tag722:ACTCACCTT
Tag723:ACTCAGTAG
Tag724:ACTCCGGTA
Tag725:ACTCCTAAG
Tag726:ACTCCTCGT
Tag727:ACTCGACAG
Tag728:ACTCGGACT
Tag729:ACTCGTGGA
Tag730:ACTGAACTG
Tag731:ACTGCAGTC
Tag732:ACTGCTTGC
Tag733:ACTGGCTAA
Tag734:ACTGGTAGG
Tag735:ACTGTCCAG
Tag736:ACTTATGGC
Tag737:ACTTCGAAC
Tag738:ACTTCGCGA
Tag739:ACTTCTCTG
Tag740:ACTTGAGTG
Tag741:AGAACACGA
Tag742:AGAACAGCC
Tag743:AGAACCAAG
Tag744:AGAACGAGT
Tag745:AGAACGGAA
Tag746:AGAACTTCG
Tag747:AGAAGACAC
Tag748:AGAAGATGG
Tag749:AGAAGCCTT
Tag750:AGAAGGTCA
Tag751:AGAATACCG
Tag752:AGAATCGTC
Tag753:AGAATGGCT
Tag754:AGACACCAT
Tag755:AGACAGTGT
Tag756:AGACATGCA
Tag757:AGACCGATA
Tag758:AGACCTTAC
Tag759:AGACGCAAC
Tag760:AGACGGTTG
Tag761:AGACGTACT
Tag762:AGACTCGGT
Tag763:AGACTGAGG
Tag764:AGACTGTCC
Tag765:AGAGAACAG
Tag766:AGAGAATGC
Tag767:AGAGACGTA
Tag768:AGAGACTCT
Tag769:AGAGCATTG
Tag770:AGAGCTACA
Tag771:AGAGGCTAG
Tag772:AGAGGTCTC
Tag773:AGAGTAGGA
Tag774:AGAGTTCGT
Tag775:AGAGTTGAG
Tag776:AGATAGTCG
Tag777:AGATCCATC
Tag778:AGATCCTGT
Tag779:AGATCGCCA
Tag780:AGATCTCAG
Tag781:AGATCTGGA
Tag782:AGATGAACC
Tag783:AGATGCGAT
Tag784:AGATGGAGA
Tag785:AGATGTGTG
Tag786:AGATTACGC
Tag787:AGCAAGCTG
Tag788:AGCAAGTAC
Tag789:AGCACTGTA
Tag790:AGCAGAGAT
Tag791:AGCATCACT
Tag792:AGCATGAGC
Tag793:AGCATTCGA
Tag794:AGCATTGCC
Tag795:AGCCACGTT
Tag796:AGCCAGCAA
Tag797:AGCCATATG
Tag798:AGCCGCTAT
Tag799:AGCCTCTGA
Tag800:AGCCTGAAT
Tag801:AGCCTTCTC
Tag802:AGCGAGAAG
Tag803:AGCGCATGA
Tag804:AGCGGTAAC
Tag805:AGCGTATCG
Tag806:AGCGTGACA
Tag807:AGCTAACCA
Tag808:AGCTACAAC
Tag809:AGCTACCGT
Tag810:AGCTAGTGA
Tag811:AGCTATGCT
Tag812:AGCTCATTC
Tag813:AGCTCGATG
Tag814:AGCTCTCTT
Tag815:AGCTGTTGG
Tag816:AGCTTAGAC
Tag817:AGCTTCAGG
Tag818:AGGAATCAC
Tag819:AGGACAAGG
Tag820:AGGACGATC
Tag821:AGGACTTGT
Tag822:AGGAGAGCA
Tag823:AGGAGCATA
Tag824:AGGAGTCTG
Tag825:AGGATACTC
Tag826:AGGATCGAA
Tag827:AGGATGTGA
Tag828:AGGATTCCT
Tag829:AGGCAAGAA
Tag830:AGGCAATCT
Tag831:AGGCACACA
Tag832:AGGCAGTTA
Tag833:AGGCATGTC
Tag834:AGGCCTCAA
Tag835:AGGCGACAT
Tag836:AGGCGTAGA
Tag837:AGGCTATAC
Tag838:AGGTAACGG
Tag839:AGGTCAGTG
Tag840:AGGTCCTAG
Tag841:AGGTCTTCA
Tag842:AGGTGATGC
Tag843:AGGTGGAAT
Tag844:AGGTGTACG
Tag845:AGGTTAGCT
Tag846:AGGTTCACC
Tag847:AGGTTGCAA
Tag848:AGGTTGTTC
Tag849:AGTAATGCG
Tag850:AGTACGCTA
Tag851:AGTACTAGC
Tag852:AGTAGCTTC
Tag853:AGTCAACCG
Tag854:AGTCACGAG
Tag855:AGTCATGGT
Tag856:AGTCCAGGA
Tag857:AGTCCGTTC
Tag858:AGTCGAGTT
Tag859:AGTCGATCC
Tag860:AGTCTCGTA
Tag861:AGTCTCTCG
Tag862:AGTCTTACC
Tag863:AGTGACACG
Tag864:AGTGAGCGT
Tag865:AGTGCACCT
Tag866:AGTGGACAA
Tag867:AGTGGATGT
Tag868:AGTGGTTCA
Tag869:AGTGTCAAC
Tag870:AGTGTGTCT
Tag871:AGTTACCTC
Tag872:AGTTGAAGG
Tag873:AGTTGCGCA
Tag874:CGACTACAA
Tag875:CGACTGACT
Tag876:CGACTTAAC
Tag877:CGAGAGTTC
Tag878:CGAGATACC
Tag879:CGAGCTATT
Tag880:CGAGGCAAT
Tag881:CGAGTAATG
Tag882:CGAGTCTAA
Tag883:CGATACGGA
Tag884:CGATACTCC
Tag885:CGATAGCAC
Tag886:CGATATAGG
Tag887:CGATCATCG
Tag888:CGATCCACT
Tag889:CGATCGTTA
Tag890:CGATGAGGT
Tag891:CGATGGCTT
Tag892:CGATGGTAG
Tag893:CGATGTGAC
Tag894:CGATGTTCT
Tag895:CGATTCCTA
Tag896:CGATTGGAA
Tag897:CGCAACAAT
Tag898:CGCAAGTGT
Tag899:CGCAATTCA
Tag900:CGCACATTG
Tag901:CGCACCATA
Tag902:CGCACTAAG
Tag903:CGCAGATCT
Tag904:CGCAGTTAC
Tag905:CGCATACCA
Tag906:CGCATCCTT
Tag907:CGCCATAGT
Tag908:CGCCATGAA
Tag909:CGCCGAATA
Tag910:CGCCTATTC
Tag911:CGCCTTGTT
Tag912:CGCGACTTA
Tag913:CGCGGATAA
Tag914:CGCGTAGTA
Tag915:CGCGTTCAT
Tag916:CGCTAACAG
Tag917:CGCTCAATT
Tag918:CGCTCTCAA
Tag919:CGCTGTATC
Tag920:CGCTTACGT
Tag921:CGCTTCTCT
Tag922:CGCTTGAAG
Tag923:CGGAACGTA
Tag924:CGGAAGATG
Tag925:CGGAGTAGT
Tag926:CGGATAACG
Tag927:CGGATACAT
Tag928:CGGATTGTC
Tag929:CGGCTCTAT
Tag930:CGGTAATAC
Tag931:CGGTACAAG
Tag932:CGGTATCGA
Tag933:CGGTATGTG
Tag934:CGGTCAGAT
Tag935:CGGTGCATT
Tag936:CGGTTACTG
Tag937:CGGTTAGGA
Tag938:CGGTTGAGT
Tag939:CGTAACTCG
Tag940:CGTAAGGCA
Tag941:CGTAATTGC
Tag942:CGTACCGAT
Tag943:CGTAGATAG
Tag944:CGTAGGACT
Tag945:CGTAGGTGA
Tag946:CGTAGTCCA
Tag947:CGTATAGCT
Tag948:CGTATTCAC
Tag949:CGTCACAGA
Tag950:CGTCACTTC
Tag951:CGTCCATAC
Tag952:CGTCGAAGT
Tag953:CGTCGCTAA
Tag954:CGTCGTATG
Tag955:CGTCTGCAT
Tag956:CGTGAACTT
Tag957:CGTGAATCA
Tag958:CGTGAGAAT
Tag959:CGTGCGATA
Tag960:CGTGGATTC
Tag961:CGTGTAGAG
Tag962:CGTGTCTGT
Tag963:CGTGTGTTG
Tag964:CGTGTTACA
Tag965:CGTTAGATC
Tag966:CGTTATCCG
Tag967:CGTTCAACC
Tag968:CGTTCCTTG
Tag969:CGTTGTGGA
Tag970:CTAACACCG
Tag971:CTAACCGTC
Tag972:CTAACTGCA
Tag973:CTAAGCACT
Tag974:CTAAGCGGA
Tag975:CTAAGGTCG
Tag976:CTAATCCTG
Tag977:CTAATGAGG
Tag978:CTACAACTC
Tag979:CTACAAGCG
Tag980:CTACACAGT
Tag981:CTACACCAA
Tag982:CTACAGTGC
Tag983:CTACCACGA
Tag984:CTACCATAG
Tag985:CTACCTACC
Tag986:CTACGAACA
Tag987:CTACGGATC
Tag988:CTACGTGTA
Tag989:CTACTAGGT
Tag990:CTACTCTCT
Tag991:CTACTGGAG
Tag992:CTACTTCCA
Tag993:CTAGACAAC
Tag994:CTAGACGTT
Tag995:CTAGAGCAG
Tag996:CTAGATTGG
Tag997:CTAGCCTGA
Tag998:CTAGCTCAC
Tag999:CTAGGCTTC
Tag1000:CTAGGTGCT
Tag1001:CTAGTACGG
Tag1002:CTAGTGACA
Tag1003:CTATCGCCT
Tag1004:CTATGACGC
Tag1005:CTCAACGAG
Tag1006:CTCAAGCCA
Tag1007:CTCAAGTTG
Tag1008:CTCAATAGC
Tag1009:CTCACATCA
Tag1010:CTCACTTGG
Tag1011:CTCAGAACG
Tag1012:CTCAGAGGT
Tag1013:CTCAGGAAT
Tag1014:CTCATCACC
Tag1015:CTCATGCAG
Tag1016:CTCATGTGA
Tag1017:CTCCAAGTA
Tag1018:CTCCAATCT
Tag1019:CTCCAGCAT
Tag1020:CTCCGATGA
Tag1021:CTCCGTTAT
Tag1022:CTCCTACTT
Tag1023:CTCCTAGAC
Tag1024:CTCCTCAAT
Tag1025:CTCGACACT
Tag1026:CTCGATCTA
Tag1027:CTCGATTCC
Tag1028:CTCGCACAA
Tag1029:CTCGCCTAT
Tag1030:CTCGGTAAG
Tag1031:CTCGTCGAA
Tag1032:CTCGTGGTT
Tag1033:CTCGTTAGA
Tag1034:CTCTACAGG
Tag1035:CTCTACCTC
Tag1036:CTCTATCGT
Tag1037:CTCTCACTG
Tag1038:CTCTCGTAG
Tag1039:CTCTGGCTA
Tag1040:CTCTGTACA
Tag1041:CTCTGTTGC
Tag1042:CTCTTAGCT
Tag1043:CTGAATCTC
Tag1044:CTGACATGT
Tag1045:CTGACGAGA
Tag1046:CTGACGTAC
Tag1047:CTGAGACCA
Tag1048:CTGAGCGAT
Tag1049:CTGAGGTTA
Tag1050:CTGATGGCA
Tag1051:CTGCAAGAT
Tag1052:CTGCATACG
Tag1053:CTGCCTCTA
Tag1054:CTGCGTATT
Tag1055:CTGCTAACT
Tag1056:CTGCTATGG
Tag1057:CTGCTTCAG
Tag1058:CTGGACATA
Tag1059:CTGGATGAA
Tag1060:CTGGCACTT
Tag1061:CTGGTACAC
Tag1062:CTGGTGATC
Tag1063:CTGTACTGC
Tag1064:CTGTAGGTC
Tag1065:CTGTCAGTA
Tag1066:CTGTCATCC
Tag1067:CTGTCTAAG
Tag1068:CTGTGAGAC
Tag1069:CTGTGCTCT
Tag1070:CTGTGGATG
Tag1071:CTGTTCCGT
Tag1072:CTTAATCGG
Tag1073:CTTACACGC
Tag1074:CTTACCAAC
Tag1075:CTTACGGAA
Tag1076:CTTAGGAGC
Tag1077:CTTATGCTC
Tag1078:CTTATTGCG
Tag1079:CTTCATGAC
Tag1080:CTTCCAGTC
Tag1081:CTTCCGAAT
Tag1082:CTTCCTCCT
Tag1083:CTTCGATCG
Tag1084:CTTCGCATA
Tag1085:CTTCGCTGT
Tag1086:CTTCTCGGA
Tag1087:CTTCTCTAC
Tag1088:CTTGAACGA
Tag1089:CTTGAAGCC
Tag1090:CTTGACTTG
Tag1091:CTTGAGAGG
Tag1092:CTTGCTGAG
Tag1093:CTTGGACAG
Tag1094:CTTGTACCT
Tag1095:CTTGTCGTC
Tag1096:GAACACACT
Tag1097:GAACACTAG
Tag1098:GAACAGATC
Tag1099:GAACATTGC
Tag1100:GAACCACAA
Tag1101:GAACCGAAT
Tag1102:GAACCGTCA
Tag1103:GAACGAACC
Tag1104:GAACGCATA
Tag1105:GAACGTAGG
Tag1106:GAACTACGT
Tag1107:GAACTCTCC
Tag1108:GAACTGAGA
Tag1109:GAACTGCTG
Tag1110:GAAGACAGG
Tag1111:GAAGACGAT
Tag1112:GAAGAGCAA
Tag1113:GAAGAGTCG
Tag1114:GAAGATCCT
Tag1115:GAAGCAACG
Tag1116:GAAGCACTC
Tag1117:GAAGCATGT
Tag1118:GAAGCGGTA
Tag1119:GAAGCTAGC
Tag1120:GAAGGATAG
Tag1121:GAAGGCTCT
Tag1122:GAAGGTGAA
Tag1123:GAAGTACCA
Tag1124:GAAGTTGCC
Tag1125:GAATAAGCC
Tag1126:GAATACCTC
Tag1127:GAATCAGGA
Tag1128:GAATCCATG
Tag1129:GAATCCGAC
Tag1130:GAATCGCGT
Tag1131:GAATCTTGG
Tag1132:GAATGGACA
Tag1133:GAATGGTTC
Tag1134:GAATGTCAC
Tag1135:GACAAGTGA
Tag1136:GACAATCCA
Tag1137:GACACGGAT
Tag1138:GACACGTTG
Tag1139:GACACTGTC
Tag1140:GACAGCTTA
Tag1141:GACAGTCAG
Tag1142:GACATACAC
Tag1143:GACATAGGT
Tag1144:GACATATCG
Tag1145:GACATCGAA
Tag1146:GACCAAGTT
Tag1147:GACCATGGA
Tag1148:GACCATTCT
Tag1149:GACCGTATC
Tag1150:GACCTAACT
Tag1151:GACCTCCTT
Tag1152:GACCTGTTA
Tag1153:GACCTTCAA
Tag1154:GACGAAGAA
Tag1155:GACGACACA
Tag1156:GACGAGAGT
Tag1157:GACGATCTG
Tag1158:GACGGAATA
Tag1159:GACGGTGTT
Tag1160:GACGGTTCA
Tag1161:GACGTAAGC
Tag1162:GACGTCAAT
Tag1163:GACGTGATG
Tag1164:GACGTGTAC
Tag1165:GACTAACGA
Tag1166:GACTACTGG
Tag1167:GACTAGAAG
Tag1168:GACTAGGCA
Tag1169:GACTCAACC
Tag1170:GACTCGATT
Tag1171:GACTCTAGA
Tag1172:GACTCTGCT
Tag1173:GACTGCCAT
Tag1174:GACTGGTCT
Tag1175:GACTTCACG
Tag1176:GACTTCGTC
Tag1177:GAGAACAAC
Tag1178:GAGAACGCT
Tag1179:GAGAAGACG
Tag1180:GAGACAATG
Tag1181:GAGACATCC
Tag1182:GAGACCTAT
Tag1183:GAGACTTGA
Tag1184:GAGAGAACT
Tag1185:GAGAGTCTA
Tag1186:GAGATACGA
Tag1187:GAGATCTTC
Tag1188:GAGATTAGG
Tag1189:GAGCACAGA
Tag1190:GAGCAGTAT
Tag1191:GAGCATAAG
Tag1192:GAGCGATTA
Tag1193:GAGCTGAAC
Tag1194:GAGCTTGGT
Tag1195:GAGGAAGTG
Tag1196:GAGGTAGAT
Tag1197:GAGGTATGG
Tag1198:GAGGTCCAA
Tag1199:GAGGTTATC
Tag1200:GAGTAAGGT
Tag1201:GAGTAGTGC
Tag1202:GAGTCACTT
Tag1203:GAGTCCAGT
Tag1204:GAGTCCTCA
Tag1205:GAGTGCAAG
Tag1206:GAGTGGTAA
Tag1207:GAGTGTCCT
Tag1208:GAGTTACCG
Tag1209:GAGTTCGGA
Tag1210:GAGTTGCTA
Tag1211:GATAACCTG
Tag1212:GATACAAGC
Tag1213:GATACCGTT
Tag1214:GATAGGAGG
Tag1215:GATATCACC
Tag1216:GATATGCCA
Tag1217:GATCACCAA
Tag1218:GATCAGGTG
Tag1219:GATCCTGAG
Tag1220:GATCCTTCC
Tag1221:GATCGACTC
Tag1222:GATCTATGC
Tag1223:GATCTCGCA
Tag1224:GATCTGTCG
Tag1225:GATGACTGT
Tag1226:GATGATCGC
Tag1227:GATGCAGCA
Tag1228:GATGCATAC
Tag1229:GATGCCTTA
Tag1230:GATGTCTAG
Tag1231:GATGTGGCT
Tag1232:GATTACGAG
Tag1233:GATTCCTGC
Tag1234:GATTGAGGC
Tag1235:GATTGCACT
Tag1236:GCAACCTCT
Tag1237:GCAACTACC
Tag1238:GCAAGCCAT
Tag1239:GCAAGGATT
Tag1240:GCAATACAG
Tag1241:GCAATCATC
Tag1242:GCAATCTGA
Tag1243:GCAATTGCG
Tag1244:GCACAACTA
Tag1245:GCACAAGAT
Tag1246:GCACACATG
Tag1247:GCACTATAC
Tag1248:GCACTCCAA
Tag1249:GCACTTCTT
Tag1250:GCACTTGGA
Tag1251:GCAGACTCA
Tag1252:GCAGATAGT
Tag1253:TTCAAGCAC
Tag1254:TTCAAGGCG
Tag1255:TTCACAAGC
Tag1256:TTCACACCT
Tag1257:TTCACAGTG
Tag1258:TTCACCACA
Tag1259:TTCACCGGT
Tag1260:TTCACCTTC
Tag1261:TTCACGCGA
Tag1262:TTCACTCAG
Tag1263:TTCACTGCC
Tag1264:TTCAGACGG
Tag1265:TTCAGCCAT
Tag1266:TTCAGGACC
Tag1267:TTCAGGTGT
Tag1268:TTCAGTCTC
Tag1269:TTCAGTGGA
Tag1270:TTCATCTGG
Tag1271:TTCATGGTC
Tag1272:TTCCAACCA
Tag1273:TTCCACACG
Tag1274:TTCCACGAA
Tag1275:TTCCAGAGT
Tag1276:TTCCGATAC
Tag1277:TTCCGCATT
Tag1278:TTCCGCTCA
Tag1279:TTCCGGAAG
Tag1280:TTCCGTCGT
Tag1281:TTCCTAAGG
Tag1282:TTCCTGCAA
Tag1283:TTCCTGGCT
Tag1284:TTCCTTGAG
Tag1285:TTCGAACTG
Tag1286:TTCGAAGGA
Tag1287:TTCGAGACA
Tag1288:TTCGAGTAG
Tag1289:TTCGCCAAC
Tag1290:TTCGCGATG
Tag1291:TTCGCTACT
Tag1292:TTCGCTTGC
Tag1293:TTCGGAGCT
Tag1294:TTCGGCAGA
Tag1295:TTCGGTGAC
Tag1296:TTCGGTTCG
Tag1297:TTCGTACGC
Tag1298:TTCGTCCAG
Tag1299:TTCTAGTGC
Tag1300:TTCTATCCG
Tag1301:TTCTCAGAC
Tag1302:TTCTCCTGA
Tag1303:TTCTCGGTT
Tag1304:TTCTGCGTA
Tag1305:TTCTGTAGG
Tag1306:TTCTTCGGC
Tag1307:TTCTTGTCG
Tag1308:TTGAACACC
Tag1309:TTGAAGTGG
Tag1310:TTGACAACG
Tag1311:TTGACCGAA
Tag1312:TTGACGCAT
Tag1313:TTGACTCGC
Tag1314:TTGAGCGTC
Tag1315:TTGAGGCTG
Tag1316:TTGATCCAC
Tag1317:TTGATGAGC
Tag1318:TTGATTCCG
Tag1319:TTGCAAGTC
Tag1320:TTGCACCTA
Tag1321:TTGCACTGT
Tag1322:TTGCAGGAG
Tag1323:TTGCCAGCA
Tag1324:TTGCCGTGA
Tag1325:TTGCCTTAC
Tag1326:TTGCGAACC
Tag1327:TTGCGACAA
Tag1328:TTGCGGATA
Tag1329:TTGCGGTCT
Tag1330:TTGCGTGTG
Tag1331:TTGCTCATC
Tag1332:TTGCTCTAG
Tag1333:TTGCTTCGA
Tag1334:TTGGAACGT
Tag1335:TTGGACTCA
Tag1336:TTGGATAGG
Tag1337:TTGGATGCC
Tag1338:TTGGCATCT
Tag1339:TTGGCCAGT
Tag1340:TTGGCCTTG
Tag1341:TTGGCTGTA
Tag1342:TTGGTCACG
Tag1343:TTGGTCGGA
Tag1344:TTGGTGCTT
Tag1345:TTGTAAGCG
Tag1346:TTGTACCGG
Tag1347:TTGTAGCCA
Tag1348:TTGTCAGGT
Tag1349:TTGTCTTGG
Tag1350:TTGTGCAAC
Tag1351:TTGTGGCGT
Tag1352:TTGTGTGCA
Tag1353:TTGTTCGCT
Tag1354:GCAGGAAGA
Tag1355:GCAGTGATA
Tag1356:GCATAGACT
Tag1357:GCATAGTAG
Tag1358:GCATCGGTT
Tag1359:GCATCTCAT
Tag1360:GCATGACAA
Tag1361:GCATGTGTC
Tag1362:GCATGTTGA
Tag1363:GCATTAACG
Tag1364:GCCAACTTG
Tag1365:GCCAATGAC
Tag1366:GCCACAATT
Tag1367:GCCACATAA
Tag1368:GCCAGGTAT
Tag1369:GCCAGTAGA
Tag1370:GCCAGTCTT
Tag1371:GCCATAACA
Tag1372:GCCATCAAG
Tag1373:GCCATTGTA
Tag1374:GCCGAATCT
Tag1375:GCCGATTAA
Tag1376:GCCGTATAG
Tag1377:GCCGTTACT
Tag1378:GCCTAAGAG
Tag1379:GCCTACGTA
Tag1380:GCCTCATTG
Tag1381:GCCTCTCTA
Tag1382:GCCTGAGTT
Tag1383:GCCTTAAGT
Tag1384:GCCTTATCC
Tag1385:GCGAATCAA
Tag1386:GCGAATTCC
Tag1387:GCGACTAAT
Tag1388:GCGATACTT
Tag1389:GCGATGAGA
Tag1390:GCGCAATAG
Tag1391:GCGCATATC
Tag1392:GCGCTATGT
Tag1393:GCGGAGATT
Tag1394:GCGGCATTA
Tag1395:GCGGTTGAA
Tag1396:GCGTAACAT
Tag1397:GCGTACTAC
Tag1398:GCGTATGCA
Tag1399:GCGTATTGG
Tag1400:GCGTCTTAA
Tag1401:GCGTGTAGT
Tag1402:GCGTTCACA
Tag1403:GCGTTGGAT
Tag1404:GCTAAGGCT
Tag1405:GCTAAGTGG
Tag1406:GCTACATCG
Tag1407:GCTACGAGT
Tag1408:GCTACTGAA
Tag1409:GCTAGAATC
Tag1410:GCTAGAGGA
Tag1411:GCTAGCACA
Tag1412:GCTATAGCC
Tag1413:GCTATCCTA
Tag1414:GCTATGATG
Tag1415:GCTCAACGT
Tag1416:GCTCACTCT
Tag1417:GCTCATGTT
Tag1418:GCTCCAACA
Tag1419:GCTCCATAT
Tag1420:GCTCGTAAC
Tag1421:GCTGACTTC
Tag1422:GCTGATCAG
Tag1423:GCTGCTATA
Tag1424:GCTGGAACT
Tag1425:GCTGTACGA
Tag1426:GCTGTCATT
Tag1427:GCTGTTCTC
Tag1428:GCTTAATGC
Tag1429:GCTTAGCTA
Tag1430:GCTTCTTGT
Tag1431:GCTTGCCTT
Tag1432:GCTTGCGAA
Tag1433:GCTTGGTAC
Tag1434:GCTTGTCCA
Tag1435:GGAACCAGA
Tag1436:GGAACGTTC
Tag1437:GGAACTATG
Tag1438:GGAACTCCA
Tag1439:GGAACTGAC
Tag1440:GGAAGAGCT
Tag1441:GGAAGGAAC
Tag1442:GGAAGGTGT
Tag1443:GGAAGTGGA
Tag1444:GGAAGTTAG
Tag1445:GGAATAAGG
Tag1446:GGAATCGAG
Tag1447:GGAATGCAT
Tag1448:GGAATGTCG
Tag1449:GGACAATTC
Tag1450:GGACAGACA
Tag1451:GGACGACTT
Tag1452:GGACGATGA
Tag1453:GGACTAGTA
Tag1454:GGACTATCT
Tag1455:GGACTCTTG
Tag1456:GGAGAAGTT
Tag1457:GGAGATTAC
Tag1458:GGAGCACAT
Tag1459:GGAGCGTAA
Tag1460:GGAGGCTTA
Tag1461:GGAGTAACC
Tag1462:GGATACGTG
Tag1463:GGATAGGAT
Tag1464:GGATATGGC
Tag1465:GGATCAAGT
Tag1466:GGATCACTA
Tag1467:GGATGAATG
Tag1468:GGATTCAAC
Tag1469:GGATTCTCA
Tag1470:GGATTGCGA
Tag1471:GGCAACTAA
Tag1472:GGCAAGATC
Tag1473:GGCAATGGT
Tag1474:GGCACTTAT
Tag1475:GGCAGCATT
Tag1476:GGCATATGA
Tag1477:GGCATGCTA
Tag1478:GGCCAACAT
Tag1479:GGCCATTAG
Tag1480:GGCCGTAAT
Tag1481:GGCCTTACA
Tag1482:GGCGAATTG
Tag1483:GGCGTACAA
Tag1484:GGCGTTAAG
Tag1485:GGCTAACTC
Tag1486:GGCTATTCC
Tag1487:GGCTCAGAA
Tag1488:GGCTCCTTA
Tag1489:GGCTGATAT
Tag1490:GGCTGTGTA
Tag1491:GGCTTAGTG
Tag1492:GGCTTCGAT
Tag1493:GGTAACAGC
Tag1494:GGTAAGAAG
Tag1495:GGTAAGCGA
Tag1496:GGTAAGTCC
Tag1497:GGTACAACT
Tag1498:GGTACACAA
Tag1499:GGTACTCGT
Tag1500:GGTAGACTG
Tag1501:GGTAGAGAC
Tag1502:GGTAGATCA
Tag1503:GGTAGCTAT
Tag1504:GGTAGTGTT
Tag1505:GGTATGGAA
Tag1506:GGTATTACG
Tag1507:GGTCATCAC
Tag1508:GGTCCAATG
Tag1509:GGTCGGATA
Tag1510:GGTCGTTCT
Tag1511:GGTCTAAGA
Tag1512:GGTCTGGTT
Tag1513:GGTCTGTAC
Tag1514:GGTGACATA
Tag1515:GGTGATAGG
Tag1516:GGTGCTAAC
Tag1517:GGTGCTTGA
Tag1518:GGTGGTCAT
Tag1519:GGTGTGATC
Tag1520:GGTGTTGGT
Tag1521:GGTTAACCT
Tag1522:GGTTACGGT
Tag1523:GGTTCAGTC
Tag1524:GGTTCATAG
Tag1525:GGTTCCATT
Tag1526:GGTTGTAAG
Tag1527:GTAACAGGT
Tag1528:GTAACCACG
Tag1529:GTAACGCTT
Tag1530:GTAACGGAG
Tag1531:GTAAGATGC
Tag1532:GTAAGCCTA
Tag1533:GTAAGTCGT
Tag1534:GTAATCGCC
Tag1535:GTACAACGG
Tag1536:GTACACGAC
Tag1537:GTACATGCT
Tag1538:GTACCAGTG
Tag1539:GTACCATCC
Tag1540:GTACCTAAG
Tag1541:GTACCTTGT
Tag1542:GTACGGTAA
Tag1543:GTACGTCTC
Tag1544:GTACTGACC
Tag1545:GTACTGTGG
Tag1546:GTAGAAGCA
Tag1547:GTAGACCGA
Tag1548:GTAGAGCTC
Tag1549:GTAGATGTG
Tag1550:GTAGCCAAT
Tag1551:GTAGCGAGA
Tag1552:GTAGCGTTG
Tag1553:GTAGGTACC
Tag1554:GTAGTATCG
Tag1555:GTAGTGGAC
Tag1556:GTATAGGCG
Tag1557:GTATCACAG
Tag1558:GTATCCGCT
Tag1559:GTATCGAAC
Tag1560:GTATGCTCG
Tag1561:GTATGGCAT
Tag1562:GTATTCAGG
Tag1563:GTCAACGCA
Tag1564:GTCACTAGT
Tag1565:GTCAGAGAG
Tag1566:GTCAGCAAC
Tag1567:GTCAGGTCA
Tag1568:GTCATACTG
Tag1569:GTCATCCGA
Tag1570:GTCATTGGC
Tag1571:GTCCACATC
Tag1572:GTCCAGCTA
Tag1573:GTCCATAGG
Tag1574:GTCCGATTG
Tag1575:GTCCGTGAA
Tag1576:GTCCTATCA
Tag1577:GTCCTGTAT
Tag1578:GTCCTTAAC
Tag1579:GTCGAACAC
Tag1580:GTCGACAAG
Tag1581:GTCGAGGAT
Tag1582:GTCGCTCTT
Tag1583:GTCGCTTAG
Tag1584:GTCGGTTGT
Tag1585:GTCGTATTC
Tag1586:GTCGTCATA
Tag1587:GTCTAGCCT
Tag1588:GTCTCACCA
Tag1589:GTCTCGTGT
Tag1590:GTCTCTATG
Tag1591:GTCTGAAGC
Tag1592:GTCTTGAGA
Tag1593:GTCTTGCTC
Tag1594:GTGAATCCT
Tag1595:GTGACAGTC
Tag1596:GTGACCATT
Tag1597:GTGAGAAGG
Tag1598:GTGAGCTAG
Tag1599:GTGAGGCAA
Tag1600:GTGAGTACA
Tag1601:GTGATCGGT
Tag1602:GTGATGACT
Tag1603:GTGATTGAG
Tag1604:GTGCAATGC
Tag1605:GTGCATTCA
Tag1606:GTGCCATAA
Tag1607:GTGCCTCAT
Tag1608:GTGCGGAAT
Tag1609:GTGCTAGGA
Tag1610:GTGCTGATG
Tag1611:GTGGACTAT
Tag1612:GTGGAGTGA
Tag1613:GTGGATAAC
Tag1614:GTGGCAACA
Tag1615:GTGGTAAGT
Tag1616:GTGGTGGTA
Tag1617:GTGGTTCTG
Tag1618:GTGTACGTT
Tag1619:GTGTAGACC
Tag1620:GTGTCCTTC
Tag1621:GTGTCTACT
Tag1622:GTGTCTCGA
Tag1623:GTGTGCAGA
Tag1624:GTGTGTTAC
Tag1625:GTGTTACGC
Tag1626:GTGTTCCAG
Tag1627:GTTAACGTC
Tag1628:GTTAAGCCG
Tag1629:GTTACCTGG
Tag1630:GTTACGACA
Tag1631:GTTAGCAGT
Tag1632:GTTAGCTCC
Tag1633:GTTATGTGC
Tag1634:GTTCACTGA
Tag1635:GTTCAGACT
Tag1636:GTTCAGGAA
Tag1637:GTTCCGTAG
Tag1638:GTTCGCGTT
Tag1639:GTTCGTTGG
Tag1640:GTTCTAGCG
Tag1641:GTTCTCAAG
Tag1642:GTTCTCCTC
Tag1643:GTTGCCATG
Tag1644:GTTGCTGTC
Tag1645:GTTGGAGAA
Tag1646:GTTGGTCTA
Tag1647:GTTGTCCGT
Tag1648:TAACACAGC
Tag1649:TAACAGGCC
Tag1650:TAACCAGAG
Tag1651:TAACCGCAC
Tag1652:TAACCTCCA
Tag1653:TAACGACGA
Tag1654:TAACGAGCT
Tag1655:TAACGGTGC
Tag1656:TAACGTCTG
Tag1657:TAAGAACGC
Tag1658:TAAGCCACC
Tag1659:TAAGCCGGT
Tag1660:TAAGCGTAG
Tag1661:TAAGGAAGG
Tag1662:TAAGGAGTC
Tag1663:TAAGGCCAA
Tag1664:TAAGGTTCC
Tag1665:TAAGTAGCG
Tag1666:TAATGCACG
Tag1667:TAATGGCGG
Tag1668:TACACGGCA
Tag1669:TACAGCGCT
Tag1670:TACATAGCC
Tag1671:TACCACCTG
Tag1672:TACCAGGTA
Tag1673:TACCATGCG
Tag1674:TACCGCTAG
Tag1675:TACCGTTGA
Tag1676:TACCTGAGC
Tag1677:TACGACGTC
Tag1678:TACGATCAC
Tag1679:TACGATGGT
Tag1680:TACGCACAG
Tag1681:TACGCATTC
Tag1682:TACGCCGAA
Tag1683:TACGGAACC
Tag1684:TACGGCCTT
Tag1685:TACGGTATG
Tag1686:TACGTGCAT
Tag1687:TACGTTCCG
Tag1688:TACTACCGC
Tag1689:TACTCAAGG
Tag1690:TACTCCATC
Tag1691:TACTCGTAC
Tag1692:TACTCTGTG
Tag1693:TAGAAGGAC
Tag1694:TAGACATGG
Tag1695:TAGACCACT
Tag1696:TAGAGGTGA
Tag1697:TAGAGTCGG
Tag1698:TAGCAACAC
Tag1699:TAGCACTCG
Tag1700:TAGCAGACT
Tag1701:TAGCCTGCT
Tag1702:TAGCGCGTT
Tag1703:TAGGAGATG
Tag1704:TAGGATCCA
Tag1705:TAGGCGCTA
Tag1706:TAGGCTACG
Tag1707:TAGGTCGAC
Tag1708:TAGGTGGCA
Tag1709:TAGGTGTGT
Tag1710:TAGTCACCA
Tag1711:TAGTCGCAG
Tag1712:TAGTCGGTC
Tag1713:TAGTGAGGA
Tag1714:TAGTGCTCC
Tag1715:TAGTTCAGC
Tag1716:TAGTTCGTG
Tag1717:TAGTTGACG
Tag1718:TATACGCCG
Tag1719:TATATCCGG
Tag1720:TATCCACGC
Tag1721:TATCGCGGA
Tag1722:TATCTCGAG
Tag1723:TATCTTGCC
Tag1724:TATGACCAG
Tag1725:TATGAGTGC
Tag1726:TATGCCTGG
Tag1727:TATGGAGGT
Tag1728:TATGGTCTC
Tag1729:TATTCTGGC
Tag1730:TATTGGCCT
Tag1731:TATTGTGCG
Tag1732:TCAACATCC
Tag1733:TCAACCGGA
Tag1734:TCAACGCGT
Tag1735:TCAACTGTG
Tag1736:TCAAGAGGC
Tag1737:TCAAGCCTC
Tag1738:TCAAGGTCT
Tag1739:TCAATCAGG
Tag1740:TCACAGCAA
Tag1741:TCACATGAG
Tag1742:TCACCAGTC
Tag1743:TCACCGAAG
Tag1744:TCACGACAT
Tag1745:TCACGGTTA
Tag1746:TCACGTACG
Tag1747:TCACTCCGT
Tag1748:TCAGAAGCC
Tag1749:TCAGAGTAC
Tag1750:TCAGATCCG
Tag1751:TCAGCACTT
Tag1752:TCAGCTGAC
Tag1753:TCAGGTTGG
Tag1754:TCAGTGCCA
Tag1755:TCAGTGGTG
Tag1756:TCATCCAAC
Tag1757:TCATCTCGC
Tag1758:TCATGAGCG
Tag1759:TCATGCTGT
Tag1760:TCCAACGAT
Tag1761:TCCAAGCTT
Tag1762:TCCAAGTCC
Tag1763:TCCAATGCA
Tag1764:TCCACTTCG
Tag1765:TCCAGAATG
Tag1766:TCCATCGTG
Tag1767:TCCATGGAA
Tag1768:TCCATTACC
Tag1769:TCCATTGGT
Tag1770:TCCGAGATC
Tag1771:TCCGCAAGA
Tag1772:TCCGCCTTA
Tag1773:TCCGCGAAT
Tag1774:TCCGTAGCA
Tag1775:TCCGTTGTC
Tag1776:TCCTAACCT
Tag1777:TCCTATAGC
Tag1778:TCCTCACTC
Tag1779:TCCTCCTAT
Tag1780:TCCTCTGGA
Tag1781:TCCTGACAG
Tag1782:TCCTGCTTC
Tag1783:TCCTGGTGA
Tag1784:TCCTTCCAA
Tag1785:TCCTTGACT
Tag1786:TCGAACCAG
Tag1787:TCGACCGTT
Tag1788:TCGACTATC
Tag1789:TCGAGAAGA
Tag1790:TCGAGTCAT
Tag1791:TCGAGTGTA
Tag1792:TCGATAGAG
Tag1793:TCGATGCTC
Tag1794:TCGCAGTTG
Tag1795:TCGCCAATG
Tag1796:TCGCGATCA
Tag1797:TCGCTCAGA
Tag1798:TCGCTGATT
Tag1799:TCGGACAAC
Tag1800:TCGGATGAT
Tag1801:TCGGCTTCA
Tag1802:TCGGTACTA
Tag1803:TCGGTATCC
Tag1804:TCGGTTAGC
Tag1805:TCGTCAAGC
Tag1806:TCGTGAGTC
Tag1807:TCGTGGACA
Tag1808:TCGTGTCGA
Tag1809:TCTAACGCC
Tag1810:TCTACACAC
Tag1811:TCTACCTTG
Tag1812:TCTACTCGA
Tag1813:TCTAGCAGC
Tag1814:TCTAGCCAA
Tag1815:TCTAGGAAG
Tag1816:TCTAGTCTG
Tag1817:TCTCAATCG
Tag1818:TCTCAGGCA
Tag1819:TCTCTCTCA
Tag1820:TCTCTGAAC
Tag1821:TCTCTGCCT
Tag1822:TCTGAGACT
Tag1823:TCTGATGTG
Tag1824:TCTGCAGAA
Tag1825:TCTGCTACC
Tag1826:TCTGGCATG
Tag1827:TCTGGTCCT
Tag1828:TCTGTTCGG
Tag1829:TCTTACCGT
Tag1830:TCTTCACGG
Tag1831:TCTTCAGCC
Tag1832:TCTTCGGAG
Tag1833:TCTTCGTTC
Tag1834:TCTTGTCAC
Tag1835:TGAACCTGG
Tag1836:TGAACGGTT
Tag1837:TGAAGCACA
Tag1838:TGAAGGCGA
Tag1839:TGAAGTGTC
Tag1840:TGACACCGA
Tag1841:TGACACTAC
Tag1842:TGACAGATG
Tag1843:TGACCAAGA
Tag1844:TGACGTGAA
Tag1845:TGACGTTGT
Tag1846:TGACTCCAG
Tag1847:TGACTGCTT
Tag1848:TGACTGGAC
Tag1849:TGAGAATCG
Tag1850:TGAGACAGT
Tag1851:TGAGACCTC
Tag1852:TGAGAGGAA
Tag1853:TGAGATGCT
Tag1854:TGAGCCATA
Tag1855:TGAGCTCTG
Tag1856:TGAGGACTA
Tag1857:TGAGGTAAG
Tag1858:TGAGTCGTT
Tag1859:TGAGTGTGG
Tag1860:TGATAGCCT
Tag1861:TGATCAGGC
Tag1862:TGATCGACG
Tag1863:TGATGTCCA
Tag1864:TGATTCGCC
Tag1865:TGCAACAGA
Tag1866:TGCACGAAC
Tag1867:TGCAGTAGC
Tag1868:TGCAGTCAA
Tag1869:TGCATGTCT
Tag1870:TGCCAGTTC
Tag1871:TGCCTACAC
Tag1872:TGCCTGATA
Tag1873:TGCCTTCCT
Tag1874:TGCGAAGAC
Tag1875:TGCGAATGT
Tag1876:TGCGAGCTA
Tag1877:TGCGGTTAT
Tag1878:TGCGTAATC
Tag1879:TGCGTCTCA
Tag1880:TGCTACGCA
Tag1881:TGCTAGGTG
Tag1882:TGCTCACAT
Tag1883:TGCTGAACA
Tag1884:TGCTGCAGT
Tag1885:TGCTTCTAC
Tag1886:TGGAACCTT
Tag1887:TGGAAGTCA
Tag1888:TGGACACAG
Tag1889:TGGACTTCC
Tag1890:TGGAGAGGT
Tag1891:TGGAGGATT
Tag1892:TGGATCATG
Tag1893:TGGATGTAG
Tag1894:TGGCAACTG
Tag1895:TGGCACAAT
Tag1896:TGGCAGAGA
Tag1897:TGGCATTGC
Tag1898:TGGCCTAAG
Tag1899:TGGCCTCTT
Tag1900:TGGCGATAG
Tag1901:TGGCTAGAT
Tag1902:TGGTACGTC
Tag1903:TGGTATGGT
Tag1904:TGGTCCACA
Tag1905:TGGTCGTAA
Tag1906:TGGTGACCT
Tag1907:TGGTGTCTC
Tag1908:TGGTTATCG
Tag1909:TGGTTCCGA
Tag1910:TGTACCGTA
Tag1911:TGTACTGAG
Tag1912:TGTAGGCAC
Tag1913:TGTATCCTC
Tag1914:TGTCACGCT
Tag1915:TGTCCATCT
Tag1916:TGTCCGGAT
Tag1917:TGTCTACGG
Tag1918:TGTCTCTGC
Tag1919:TGTGCAAGG
Tag1920:TGTGCACTC
Tag1921:TGTGCGTAC
Tag1922:TGTGCTCAA
Tag1923:TGTGGCGAA
Tag1924:TGTGGTTGC
Tag1925:TGTGTAGGC
Tag1926:TGTGTGAGT
Tag1927:TGTTACACC
Tag1928:TGTTAGAGG
Tag1929:TGTTCGGCA
Tag1930:TGTTCTTCG
Tag1931:TGTTGCTAG
Tag1932:TGTTGGTCC
Tag1933:TTAGCCGAG
Tag1934:TTATCGCTG
Tag1935:TTATCGGCC

[9nt ed4]
Tag0:TTGTGGACT
Tag1:AACAACACC
Tag2:AACAAGCGA
Tag3:AACACAAGG
Tag4:AACACCGTT
Tag5:AACAGGTAC
Tag6:AACAGTCTG
Tag7:AACATTGGC
Tag8:AACCATCCT
Tag9:AACCGAACA
Tag10:AACCTCGAA
Tag11:AACGATGAG
Tag12:AACGCCTCA
Tag13:AACGGACGT
Tag14:AACTTACCG
Tag15:AAGAACCAG
Tag16:AAGAAGGCT
Tag17:AAGACGATC
Tag18:AAGCCACTG
Tag19:AAGCCTGGT
Tag20:AAGCGGCAA
Tag21:AAGCTAAGC
Tag22:AAGGAATCC
Tag23:AAGGCGTAG
Tag24:AAGGTCCGA
Tag25:AAGTGAGGA
Tag26:AAGTGCCTT
Tag27:AAGTTCGCC
Tag28:AATACCTGC
Tag29:AATAGAGCC
Tag30:AATCGCTTG
Tag31:AATCTGGCG
Tag32:AATGCACAC
Tag33:ACAACAGAG
Tag34:ACAACCTCT
Tag35:ACAAGATGC
Tag36:ACAAGGACA
Tag37:ACAATTCGG
Tag38:ACACACCAA
Tag39:ACACCAATC
Tag40:ACACGTGGA
Tag41:ACACTAGCT
Tag42:ACAGGCAGT
Tag43:ACATGTCCT
Tag44:ACCAACTTG
Tag45:ACCAGTGAT
Tag46:ACCGAGAAC
Tag47:ACCGCATAT
Tag48:ACCGTACTC
Tag49:ACCTATAGG
Tag50:ACCTCACGA
Tag51:ACCTCGTTC
Tag52:ACCTTCTGT
Tag53:CAGCCAGAA
Tag54:CAGCGAATT
Tag55:CAGCGTTAC
Tag56:CAGCTATCG
Tag57:CAGCTCCAT
Tag58:CAGGACAAC
Tag59:CAGGATGTA
Tag60:CAGTAACCT
Tag61:CAGTAGATG
Tag62:CAGTCTTGA
Tag63:CATAACGGA
Tag64:CATAAGTCG
Tag65:CATACTACC
Tag66:CATAGGCTA
Tag67:CATCATCTC
Tag68:CATCCACGT
Tag69:CATCGGAAG
Tag70:CATGAGAGT
Tag71:CATGGTTGG
Tag72:CATGTAGCA
Tag73:CATTCCGAC
Tag74:CATTGCTCT
Tag75:CCAACACTA
Tag76:CCAAGCCAT
Tag77:CCAATAACG
Tag78:CCAATCGTC
Tag79:CCACAAGAC
Tag80:CCACATTCT
Tag81:CCACCGTAA
Tag82:CCAGAATGG
Tag83:CCAGAGGTT
Tag84:CCAGTTAGC
Tag85:CCATCTCAG
Tag86:CCGAAGAGA
Tag87:CCGACTAAT
Tag88:CCGAGTTCA
Tag89:CCGCTTGTT
Tag90:CCGGTCATA
Tag91:CCGTTGGAA
Tag92:CCTAGTGTG
Tag93:CCTATGCAC
Tag94:CCTCACATT
Tag95:CCTCCAACA
Tag96:CCTCTATGC
Tag97:CCTGGAATC
Tag98:CCTTAAGGT
Tag99:CCTTAGACC
Tag100:CCTTCCTTA
Tag101:CCTTGATAG
Tag102:CGAACAAGT
Tag103:CGAACTGAA
Tag104:CGAAGGATC
Tag105:CGAATGTGG
Tag106:CGACAACCA
Tag107:CGACCATTG
Tag108:ATAATGGCC
Tag109:ATACCGCAG
Tag110:ATAGGTGTC
Tag111:ATAGTCCAC
Tag112:ATATGACGG
Tag113:ATCCAAGCC
Tag114:ATCCGGCTT
Tag115:ATCCTGTCA
Tag116:ATCGCGAGA
Tag117:ATCGTCGCT
Tag118:ATCTCAGTG
Tag119:ATGACACCT
Tag120:ATGAGCATG
Tag121:ATGCAATGG
Tag122:ATGCTTGAC
Tag123:ATGGATACG
Tag124:ATGGCCAAT
Tag125:ATGTAGGTC
Tag126:ATGTGTAGC
Tag127:ATTAGCCGA
Tag128:ATTCCAGGA
Tag129:ATTGGTCAG
Tag130:CAAGTGTCC
Tag131:CACATGGTG
Tag132:CACCTGACT
Tag133:CAGATCAGG
Tag134:ACGATCTAC
Tag135:ACGGATTGA
Tag136:ACGTGGTAT
Tag137:ACTCACTCC
Tag138:ACTCCTAAG
Tag139:ACTGAAGCG
Tag140:ACTGCGACT
Tag141:AGACGCGAT
Tag142:AGACTTCTC
Tag143:AGAGACACA
Tag144:AGAGATCGT
Tag145:AGATAGGAG
Tag146:AGATCGTCA
Tag147:AGCGGTTCT
Tag148:AGCTACCTA
Tag149:AGGCAAGTT
Tag150:AGGCCTTAA
Tag151:AGGCTGATG
Tag152:AGGTAACAC
Tag153:AGTCCGTGT
Tag154:AGTCTCAAC
Tag155:AGTGACTAG
Tag156:AGTGTGCCA
Tag157:AGTTCTCGG
Tag158:CGAGACTTC
Tag159:CGAGGTAAG
Tag160:CGATTCCTG
Tag161:CGCACTCTT
Tag162:CGCAGATAT
Tag163:CGCGTACAA
Tag164:CGCTAATGA
Tag165:CGGATAGCT
Tag166:CGGTATTAG
Tag167:CGGTTAATC
Tag168:CGTCATACG
Tag169:CGTCGAGTA
Tag170:CGTGTCGAT
Tag171:CTAACCAAC
Tag172:CTACAGTGC
Tag173:CTACTCGGT
Tag174:CTAGCAGCT
Tag175:CTCAGCTTA
Tag176:CTCCACTAG
Tag177:CTCCTTATC
Tag178:CTCGATCGA
Tag179:CTCTCGCAA
Tag180:CTCTCTTCG
Tag181:CTGAACGTT
Tag182:CTGGTGCTT
Tag183:CTGTTACAG
Tag184:CTTACGAGG
Tag185:CTTGACCTG
Tag186:CTTGAGGAA
Tag187:CTTGATTCC
Tag188:GAACAGCAT
Tag189:GAACCTATG
Tag190:GAACGGTTA
Tag191:GAAGACCTA
Tag192:GAAGAGACG
Tag193:GAAGCTTCT
Tag194:GAATACGGT
Tag195:GAATCAACC
Tag196:GAATTGCGA
Tag197:GACACTCAC
Tag198:GACGAAGTC
Tag199:GACGTCATT
Tag200:GACGTTCCA
Tag201:GACTCTGTA
Tag202:GACTGACAA
Tag203:GAGAATAGC
Tag204:GAGAGGAAT
Tag205:GAGGTGTGT
Tag206:GAGTGTTCG
Tag207:GATGGTGAA
Tag208:GATTAGTGC
Tag209:GCAATGAGT
Tag210:TTCAAGCAG
Tag211:TTCACACGC
Tag212:TTCACGGTA
Tag213:TTCAGTTGG
Tag214:TTCCGAAGT
Tag215:TTCCTCCTA
Tag216:TTCGAGTCT
Tag217:TTCGCCATC
Tag218:TTCGGACCA
Tag219:TTCTGCTCC
Tag220:TTCTTCGAG
Tag221:TTGACCACA
Tag222:TTGATCCGT
Tag223:TTGCAGAAC
Tag224:TTGCCGTGA
Tag225:TTGGAAGGA
Tag226:TTGTGTGTG
Tag227:GCAGGCTAA
Tag228:GCATGCATG
Tag229:GCCATAGAA
Tag230:GCCTAATAC
Tag231:GCCTGTTGA
Tag232:GCGGAACAT
Tag233:GCGTATCTG
Tag234:GCTAACCGT
Tag235:GCTAGGTCT
Tag236:GCTCCAGAT
Tag237:GCTCTTACT
Tag238:GCTTACGCA
Tag239:GCTTGTAAC
Tag240:GGAACATAC
Tag241:GGAATCCAA
Tag242:GGACTAAGG
Tag243:GGAGAGTGA
Tag244:GGATACTCG
Tag245:GGATCGATT
Tag246:GGCAATTCC
Tag247:GGCCACAAT
Tag248:GGCTTGGAT
Tag249:GGTAAGAAG
Tag250:GGTACTGTC
Tag251:GGTAGTACA
Tag252:GGTCTCCTT
Tag253:GGTGCAAGA
Tag254:GGTTGACGT
Tag255:GTAACGCTC
Tag256:GTACAACTG
Tag257:GTAGCTGAG
Tag258:GTAGTGGTA
Tag259:GTATCTCCA
Tag260:GTATTCAGC
Tag261:GTCCGATTC
Tag262:GTCGGTATG
Tag263:GTCTTGTGG
Tag264:GTGCGTCTA
Tag265:GTGTCCTAA
Tag266:GTGTTATCC
Tag267:GTTATCGAC
Tag268:GTTCCATCG
Tag269:TAACGTAGC
Tag270:TAACTCCGG
Tag271:TAAGCGCGT
Tag272:TAAGTGGAG
Tag273:TATGTCACG
Tag274:TCAGGACTG
Tag275:TCATCTGGT
Tag276:TCCATGGCT
Tag277:TCCGCTACA
Tag278:TCGAAGCTT
Tag279:TCGACTTGC
Tag280:TCGCACGAT
Tag281:TCGGTAGAC
Tag282:TCGTGCCAA
Tag283:TCTCGCTGT
Tag284:TGAGATGCC
Tag285:TGAGTCTCT
Tag286:TGATGCGGA
Tag287:TGCACATCA
Tag288:TGCACCAAG
Tag289:TGCAGGAGA
Tag290:TGCATGTTC
Tag291:TGCCAACTC
Tag292:TGCGAGATG
Tag293:TGCGTTAGT
Tag294:TGGCTCAGA
Tag295:TGGCTTCCT
Tag296:TGTAGACCG
Tag297:TGTGGCTTA
Tag298:TGTTCGGCT
Tag299:TTACCTTCC
Tag300:TTATTGCCG

[9nt ed5]
Tag0:TTGGTACAG
Tag1:AACAACACC
Tag2:AACACGGAA
Tag3:AACAGATGG
Tag4:AACCGCCTT
Tag5:AACGTAGCT
Tag6:AAGACTCGT
Tag7:AAGGAGTAC
Tag8:AAGTCCAAG
Tag9:AATATGCCG
Tag10:ACAACCTGA
Tag11:ACACTGTCC
Tag12:ACCGATCAA
Tag13:ACCTAAGGC
Tag14:CAGCCACTA
Tag15:CAGCTTAAC
Tag16:CAGGTCTTG
Tag17:CAGTAGAGA
Tag18:CATAGGTTC
Tag19:CATGAACGG
Tag20:CATTCAGCC
Tag21:CCAACAGTT
Tag22:CCAAGTACA
Tag23:CCATTGATG
Tag24:CCGGAATCT
Tag25:CCTCACCAT
Tag26:CCTCTTGGA
Tag27:CGACATTCG
Tag28:CGACCGAAT
Tag29:ATAGTCGGC
Tag30:ATCCTGGTG
Tag31:ATGCCTTCA
Tag32:ATGGCGATT
Tag33:AGATGCATC
Tag34:AGGTAACCA
Tag35:AGTGGTCCT
Tag36:CGCTGTGTT
Tag37:CGTGGCTAA
Tag38:CTCATACTC
Tag39:CTCGAGAAG
Tag40:CTTCCATGT
Tag41:GAATCCGTA
Tag42:GATCTCTCT
Tag43:GATGAGGCA
Tag44:GATTGTGAG
Tag45:GCACGTTAT
Tag46:TTCAATCCG
Tag47:TTCACGAGC
Tag48:TTCTGCCAA
Tag49:TTGTGTTGC
Tag50:GCCTTCTTC
Tag51:GCGAATAGC
Tag52:GCTAGACGT
Tag53:GGACAACTT
Tag54:GGCCTAGAA
Tag55:GGTGATATG
Tag56:GTAAGCAGG
Tag57:GTCTGAACC
Tag58:GTTACCTAC
Tag59:TCGAAGGTA
Tag60:TCGCCTATG
Tag61:TGTTCGACA

[9nt ed6]
Tag0:TTGTGGCCA
Tag1:AACAACACC
Tag2:AACCGAGGA
Tag3:AACGTTCTG
Tag4:ACAGCCGTT
Tag5:ACCTCTTAC
Tag6:CAGGAATAG
Tag7:CATACGCAA
Tag8:CCAATGTGG
Tag9:CCTTACAGT
Tag10:ATGGTGAGT
Tag11:AGTTAGGCG
Tag12:CGAGATCCT
Tag13:GAATGGATC
Tag14:TTCACCTGA
Tag15:TTGCCAATC
Tag16:GGCGTAACA
Tag17:GGTCTGCTT

[9nt ed7]
Tag0:TTGTACCTC
Tag1:AACAACACG
Tag2:AAGCCGGTA
Tag3:CAGGTATGG
Tag4:CCATTGAAC
Tag5:GGCTCTCAT

[9nt ed8]
Tag0:TTGTTGCGA
Tag1:AACAACACC
Tag2:CATCCGGTT

[10nt ed3]
Tag0:TTGTTGGTCT
Tag1:AACAACAACC
Tag2:AACAACACAG
Tag3:AACAACAGGA
Tag4:AACAACCGAC
Tag5:AACAACCTCA
Tag6:AACAACGAGT
Tag7:AACAACGGCG
Tag8:AACAACGTTC
Tag9:AACAACTCCT
Tag10:AACAACTTGG
Tag11:AACAAGAAGG
Tag12:AACAAGACCA
Tag13:AACAAGCACT
Tag14:AACAAGCGTA
Tag15:AACAAGCTGC
Tag16:AACAAGGAAC
Tag17:AACAAGGCTT
Tag18:AACAAGTGAG
Tag19:AACAATACGC
Tag20:AACAATTGCC
Tag21:AACACAACGA
Tag22:AACACAAGCT
Tag23:AACACACATC
Tag24:AACACACTGT
Tag25:AACACAGCCG
Tag26:AACACAGTAC
Tag27:AACACATAGG
Tag28:AACACCAATG
Tag29:AACACCGCAA
Tag30:AACACCGGTT
Tag31:AACACCTAAC
Tag32:AACACGAGAA
Tag33:AACACGATCC
Tag34:AACACGCCAC
Tag35:AACACGCTTG
Tag36:AACACGGTGA
Tag37:AACACGTCGT
Tag38:AACACTCACA
Tag39:AACACTCCGG
Tag40:AACACTGAAG
Tag41:AACACTGCTC
Tag42:AACAGAACAC
Tag43:AACAGAATCG
Tag44:AACAGACCTG
Tag45:AACAGACGCC
Tag46:AACAGAGAGC
Tag47:AACAGAGGAT
Tag48:AACAGCCAGA
Tag49:AACAGCCTAT
Tag50:AACAGCTACG
Tag51:AACAGCTGGT
Tag52:AACAGGAGTG
Tag53:AACAGGCAAG
Tag54:AACAGGTATC
Tag55:AACAGTAGCA
Tag56:AACAGTCTTC
Tag57:AACAGTGACT
Tag58:AACAGTGTGG
Tag59:AACAGTTCAG
Tag60:AACATAAGGC
Tag61:AACATAGGTG
Tag62:AACATCCGCT
Tag63:AACATCGTAG
Tag64:AACATCTCGA
Tag65:AACATGGACA
Tag66:AACATGGCGC
Tag67:AACATGTCCG
Tag68:AACCAACAGC
Tag69:AACCAACCAA
Tag70:AACCAACGTG
Tag71:AACCAAGACG
Tag72:AACCAATCTC
Tag73:AACCAATGCA
Tag74:AACCACACTA
Tag75:AACCACAGAT
Tag76:AACCACCATT
Tag77:AACCACGTAA
Tag78:AACCACTGGC
Tag79:AACCAGAGTC
Tag80:AACCAGATAG
Tag81:AACCAGGAGA
Tag82:AACCAGTCAT
Tag83:AACCAGTTCC
Tag84:AACCATACCG
Tag85:AACCATCAAG
Tag86:AACCATCGGA
Tag87:AACCATGCGT
Tag88:AACCATGTTG
Tag89:AACCGAACCT
Tag90:AACCGAAGGA
Tag91:AACCGACTAC
Tag92:AACCGAGATT
Tag93:AACCGAGCAG
Tag94:AACCGATTGG
Tag95:AACCGCAACA
Tag96:AACCGCATGC
Tag97:AACCGCCGAA
Tag98:AACCGCGTCT
Tag99:AACCGCTAAT
Tag100:AACCGGAAGT
Tag101:AACCGGACAA
Tag102:AACCGGCCTT
Tag103:AACCGGCTCA
Tag104:AACCGTAGAC
Tag105:AACCGTCACC
Tag106:AACCGTGGTA
Tag107:AACCGTTATG
Tag108:AACCGTTCGA
Tag109:AACCGTTGCT
Tag110:AACCTACGGT
Tag111:AACCTAGCCA
Tag112:AACCTAGTGC
Tag113:AACCTATGAG
Tag114:AACCTCAATC
Tag115:AACCTCAGCG
Tag116:AACCTCCTCC
Tag117:AACCTCGCAC
Tag118:AACCTCTCTG
Tag119:AACCTGATCT
Tag120:AACCTGCATA
Tag121:AACCTGCTGG
Tag122:AACCTGTGTT
Tag123:AACCTTAAGG
Tag124:AACCTTCCAT
Tag125:AACCTTCGTC
Tag126:AACGAACCGG
Tag127:AACGAAGATC
Tag128:AACGAAGTGT
Tag129:AACGACATCT
Tag130:AACGACCACG
Tag131:AACGACGCAT
Tag132:AATAATCGCG
Tag133:AATACACACG
Tag134:AATACACGGA
Tag135:AATACAGCGC
Tag136:AATACCAAGC
Tag137:AATACCACCA
Tag138:AATACCGACT
Tag139:AATACCGTGG
Tag140:AATACCTCAG
Tag141:AATACCTGCC
Tag142:AATACGAGGT
Tag143:AATACGCCTA
Tag144:AATACGCGAG
Tag145:AATACGGATC
Tag146:AATACGTTCG
Tag147:AATACTCGTC
Tag148:AATACTGGCA
Tag149:AATAGAACGG
Tag150:AATAGACTGC
Tag151:AATAGAGCCA
Tag152:AATAGCAGAC
Tag153:AATAGCCATC
Tag154:AATAGCCGCA
Tag155:AATAGCGCGT
Tag156:AATAGCGTCC
Tag157:AATAGCTGTG
Tag158:AATAGGAACC
Tag159:AATAGGCTCT
Tag160:AATAGGTAGG
Tag161:AATAGTGCAC
Tag162:AATAGTTGGC
Tag163:AATATAGGCC
Tag164:AATATCCAGG
Tag165:AATATGAGCG
Tag166:AATATGCGGC
Tag167:AATATTGCCG
Tag168:AATCAACCGT
Tag169:AATCAAGGTC
Tag170:AATCACAGCA
Tag171:AATCACCTCT
Tag172:AATCACGAAC
Tag173:AATCAGACGA
Tag174:AATCAGCACC
Tag175:AATCAGCGTT
Tag176:AATCAGGCCG
Tag177:AATCATCCAC
Tag178:AATCATCTGG
Tag179:AATCATGGAG
Tag180:AATCCAATCG
Tag181:AATCCACCTG
Tag182:AATCCACGCC
Tag183:AATCCAGAGG
Tag184:AATCCAGGAT
Tag185:AATCCATTGC
Tag186:AATCCGAGTA
Tag187:AATCCGCCAT
Tag188:AATCCGCTGA
Tag189:AATCCGGTCC
Tag190:AATCCGTAAG
Tag191:AATCCTAACC
Tag192:AATCCTCGAA
Tag193:AATCCTGCTT
Tag194:AATCCTTCCG
Tag195:AATCCTTGGT
Tag196:AATCGAACTC
Tag197:AATCGAAGAG
Tag198:AATCGAGTTG
Tag199:AATCGATACG
Tag200:AATCGCCAAG
Tag201:AATCGCCGGT
Tag202:AATCGCTAGC
Tag203:AATCGCTCCA
Tag204:AATCGGAATG
Tag205:AATCGGAGCT
Tag206:AATCGGCGAC
Tag207:AATCGGTCGT
Tag208:AATCGTCAGA
Tag209:AATCGTGCGG
Tag210:AATCGTGGCC
Tag211:AATCTCACAG
Tag212:AATCTCAGGC
Tag213:AATCTCCGTA
Tag214:AATCTCGATG
Tag215:AATCTGCAGT
Tag216:AATCTGCCTC
Tag217:AATCTGTGGA
Tag218:AATCTTCGCT
Tag219:AATCTTGAGC
Tag220:AATGAACGAC
Tag221:AATGAAGCCT
Tag222:AATGACAAGG
Tag223:AATGACAGTC
Tag224:AATGACCTGA
Tag225:AATGACGGAA
Tag226:AATGACTACC
Tag227:AATGACTGGT
Tag228:AATGAGACAG
Tag229:AATGAGATCC
Tag230:AATGAGGAGC
Tag231:AATGAGGCTA
Tag232:AATGAGTGCG
Tag233:AATGATTCGC
Tag234:AATGCACCAA
Tag235:AATGCACTTC
Tag236:AATGCAGGTG
Tag237:AATGCATCGT
Tag238:AATGCATGCA
Tag239:AATGCCACAC
Tag240:AATGCCAGCG
Tag241:AATGCCGTAT
Tag242:AATGCCTCTA
Tag243:AATGCGAACA
Tag244:AATGCGATGG
Tag245:AATGCGTGAC
Tag246:AATGCTACGA
Tag247:AATGCTCACT
Tag248:AATGCTTAGG
Tag249:AATGGAAGGC
Tag250:AATGGACCTT
Tag251:AATGGACGCG
Tag252:AATGGAGAAC
Tag253:AATGGAGTGA
Tag254:AATGGCAACT
Tag255:AATGGCATAG
Tag256:AATGGCGCTC
Tag257:AATGGCTCGG
Tag258:AATGGTACTG
Tag259:AATGGTCTAC
Tag260:AATGGTGAGT
Tag261:AATGGTTCCT
Tag262:AATGTAACCG
Tag263:AATGTCCGAG
Tag264:AATGTCGCCA
Tag265:AATGTCGGTT
Tag266:AATGTCTTCG
Tag267:AATGTGGAAG
Tag268:AATGTGGCGT
Tag269:AATGTGTTGC
Tag270:AATGTTAGCC
Tag271:AATGTTCGGA
Tag272:AATGTTGTGG
Tag273:AATTAAGCGG
Tag274:AATTACCGGC
Tag275:AATTACGACG
Tag276:AATTAGCCTG
Tag277:AATTCCACGT
Tag278:AATTCCATCC
Tag279:AATTCCTGGA
Tag280:AATTCGCAAC
Tag281:AATTCGCGCT
Tag282:AATTCGGAGA
Tag283:AATTCGTCTC
Tag284:AATTCTCCGC
Tag285:AATTGACCAC
Tag286:AATTGATGCC
Tag287:AATTGCACCG
Tag288:AATTGCGGAT
Tag289:AATTGGAGTC
Tag290:AATTGGCACA
Tag291:AATTGGTCAG
Tag292:AATTGTCGTG
Tag293:ACAACAACGG
Tag294:ACAACAAGAC
Tag295:ACAACACACA
Tag296:ACAACACCTC
Tag297:ACAACAGAAG
Tag298:ACAACAGGCT
Tag299:ACAACATGTG
Tag300:ACAACATTCC
Tag301:ACAACCAACT
Tag302:ACAACCAGTA
Tag303:ACAACCATGC
Tag304:ACAACCGCAT
Tag305:ACAACCGTCG
Tag306:ACAACCTAGG
Tag307:ACAACGAATC
Tag308:ACAACGCCAA
Tag309:ACAACGCGGT
Tag310:ACAACGGAGA
Tag311:ACAACGGTAC
Tag312:ACAACGTCTT
Tag313:ACAACGTGCA
Tag314:ACAACTCGAG
Tag315:ACAACTGACC
Tag316:ACAAGAACCT
Tag317:ACAAGACAAC
Tag318:ACAAGACGCG
Tag319:ACAAGACTGA
Tag320:ACAAGAGAGT
Tag321:ACAAGAGGAA
Tag322:ACAAGAGTTC
Tag323:ACAAGATCAG
Tag324:ACAAGATGGC
Tag325:ACAAGCAATG
Tag326:ACAAGCAGCC
Tag327:ACAAGCCGTT
Tag328:ACAAGCGACA
Tag329:ACAAGCTCTA
Tag330:ACAAGGCAGG
Tag331:ACAAGGCTCC
Tag332:ACAAGGTGAT
Tag333:ACAAGTAAGC
Tag334:ACAAGTCCAT
Tag335:ACAAGTGCCG
Tag336:ACAATACCGT
Tag337:ACAATAGCAC
Tag338:ACAATAGTGG
Tag339:ACAATCACGA
Tag340:ACAATCCAAG
Tag341:ACAATCCGGC
Tag342:ACAATCCTCT
Tag343:ACAATCGCTG
Tag344:ACAATGAACG
Tag345:ACAATGGCCA
Tag346:ACAATGTCGC
Tag347:ACAATTGGTC
Tag348:ACACAACATG
Tag349:ACACAACTAC
Tag350:ACACAAGAGA
Tag351:ACACAAGGCC
Tag352:ACACAATCCA
Tag353:ACACAATGGT
Tag354:ACACACACGC
Tag355:ACACACAGTT
Tag356:ACACACCGGA
Tag357:ACACACGACT
Tag358:ACACACGCAG
Tag359:ACACACTTCG
Tag360:ACACAGATTG
Tag361:ACACAGCGTC
Tag362:ACACAGGTAA
Tag363:ACACAGTCGG
Tag364:ACACATAACC
Tag365:ACACATGCTA
Tag366:ACACATTGAC
Tag367:ACACCACTCT
Tag368:ACACCAGCTG
Tag369:ACACCATATC
Tag370:ACACCATGAA
Tag371:ACACCGACCA
Tag372:ACACCGATGT
Tag373:ACACCGCTTA
Tag374:ACACCTAAGA
Tag375:ACACCTACAT
Tag376:ACACCTCGTT
Tag377:ACACCTCTGC
Tag378:ACACCTGGCA
Tag379:ACACCTGTAG
Tag380:ACACGAACAA
Tag381:ACACGACCTT
Tag382:ACACGAGACG
Tag383:ACACGAGTAT
Tag384:ACACGCAAGT
Tag385:ACACGCATCA
Tag386:ACACGCCTAG
Tag387:ACACGCGAAC
Tag388:ACACGCTCCT
Tag389:ACACGGAATA
Tag390:ACACGGCACT
Tag391:ACACGGTCTC
Tag392:ACACGTACTG
Tag393:ACACGTATAC
Tag394:ACACGTCCGA
Tag395:ACACGTGATT
Tag396:ACACGTTAAG
Tag397:ACACGTTGTA
Tag398:ACACTAAGCG
Tag399:ACACTACGTA
Tag400:ACACTAGCCT
Tag401:ACACTCAGAC
Tag402:ACACTCATGG
Tag403:ACACTCCACC
Tag404:ACACTCTCAA
Tag405:ACACTGAGGA
Tag406:ACACTGCGAT
Tag407:ACACTGGAGC
Tag408:ACACTGGTCG
Tag409:ACACTGTACA
Tag410:ACACTTCAGT
Tag411:ACACTTCCTC
Tag412:ACACTTGCGG
Tag413:ACAGAACAGT
Tag414:ACAGAACGCA
Tag415:ACAGAAGAAC
Tag416:ACAGAAGCCG
Tag417:ACAGAAGGTT
Tag418:ACAGAATCTC
Tag419:ACAGAATGAG
Tag420:ACAGACACTA
Tag421:ACAGACCTCC
Tag422:ACAGACGAGG
Tag423:ACAGACTCAT
Tag424:ACAGAGAAGA
Tag425:ACAGAGCCAC
Tag426:ACAGAGCTGG
Tag427:ACAGAGGCGT
Tag428:ACAGAGTACC
Tag429:ACAGAGTGTA
Tag430:ACAGATACGG
Tag431:ACAGATAGCT
Tag432:ACAGATGACA
Tag433:ACAGATGTTG
Tag434:ACAGCAACTT
Tag435:ACAGCAGATA
Tag436:ACAGCAGTGC
Tag437:ACAGCCACAG
Tag438:ACAGCCAGGT
Tag439:ACAGCCGGAA
Tag440:ACAGCCTCGA
Tag441:ACAGCCTGTC
Tag442:ACAGCGATCG
Tag443:ACAGCGCATT
Tag444:ACAGCGTTAT
Tag445:ACAGCTATTC
Tag446:ACAGCTGAAT
Tag447:ACAGCTTAGC
Tag448:ACAGCTTCCG
Tag449:ACAGGAAGTC
Tag450:ACAGGACGAT
Tag451:ACAGGACTTG
Tag452:ACAGGATTAC
Tag453:ACAGGCCATA
Tag454:ACAGGCGTCT
Tag455:ACAGGCTGCA
Tag456:ACAGGTAACG
Tag457:ACAGGTAGAA
Tag458:ACAGGTATGT
Tag459:ACAGGTTCTT
Tag460:ACAGTACATC
Tag461:ACAGTACCAA
Tag462:ACAGTATGCC
Tag463:ACAGTCAACA
Tag464:ACAGTCCGTG
Tag465:ACAGTCGTAC
Tag466:ACAGTCTAGT
Tag467:ACAGTGAGAG
Tag468:ACAGTGGCTC
Tag469:ACAGTGGTGA
Tag470:ACAGTGTCCT
Tag471:ACAGTTCTCA
Tag472:ACAGTTGGCG
Tag473:ACATAACACC
Tag474:ACATAACCAG
Tag475:ACATACCTTG
Tag476:ACATACGCTC
Tag477:ACATACGTGT
Tag478:ACATACTAGC
Tag479:ACATAGGAAG
Tag480:ACATCACAGG
Tag481:ACATCAGCAA
Tag482:ACATCATCCT
Tag483:ACATCCTCAC
Tag484:ACATCCTGCG
Tag485:ACATCGACGC
Tag486:ACATCGGTCA
Tag487:ACATCGTTGG
Tag488:ACATCTCGCC
Tag489:ACATGAATGC
Tag490:ACATGATCGA
Tag491:ACATGCACAT
Tag492:ACATGCCGAC
Tag493:ACATGCGTAA
Tag494:ACATGGAGGT
Tag495:ACATGGCCTG
Tag496:ACATGGCTAT
Tag497:ACATGGTGCC
Tag498:ACATGTGGAT
Tag499:ACATTACTCG
Tag500:ACATTAGGCA
Tag501:ACATTCCAGA
Tag502:ACATTCTTCC
Tag503:ACATTGCTGC
Tag504:ACCAACACGT
Tag505:ACCAACGATA
Tag506:ACCAACGCAC
Tag507:ACCAACTAAG
Tag508:ACCAACTGTC
Tag509:ACCAAGACTC
Tag510:ACCAAGCCAG
Tag511:ACCAAGGCGA
Tag512:ACCAAGGTCT
Tag513:ACCAAGTACA
Tag514:ACCAATAGCG
Tag515:ACCAATCAAC
Tag516:ACCAATCGTT
Tag517:ACCAATCTGA
Tag518:ACCAATGGAA
Tag519:ACCAATTCGG
Tag520:ACCACAATAG
Tag521:ACCACACAAT
Tag522:ACCACCTCCA
Tag523:ACCACCTGAT
Tag524:ACCACGGATG
Tag525:ACCACGTAGC
Tag526:ACCACTACAC
Tag527:ACCACTAGGT
Tag528:ACCACTCTCT
Tag529:ACCACTGTTA
Tag530:ACCAGAAGTA
Tag531:ACCAGACGGT
Tag532:ACCAGAGCTT
Tag533:ACCAGATTCA
Tag534:ACCAGCAGAG
Tag535:ACCAGCATCT
Tag536:ACCAGCCTTA
Tag537:ACCAGGAATT
Tag538:ACCAGGTCAC
Tag539:ACCAGGTGGA
Tag540:ACCAGTGATC
Tag541:ACCAGTTGTG
Tag542:ACCATAACTG
Tag543:ACCATACAGA
Tag544:ACCATACTCC
Tag545:ACCATATGCT
Tag546:ACCATCATTC
Tag547:ACCATCCGAA
Tag548:ACCATCGAGG
Tag549:ACCATCGCCT
Tag550:ACCATCTTGT
Tag551:ACCATGAGAC
Tag552:ACCATTACCA
Tag553:ACCATTATGG
Tag554:ACCATTCACG
Tag555:ACCGAACTAT
Tag556:ACCGAAGTCC
Tag557:ACCGAATAGA
Tag558:ACCGACAAGC
Tag559:ACCGACAGAA
Tag560:ACCGACATTG
Tag561:ACCGACGTGA
Tag562:ACCGACTGCT
Tag563:ACCGAGAACT
Tag564:ACCGAGCATA
Tag565:ACCGAGGTAG
Tag566:ACCGAGTCTG
Tag567:ACCGATCCGT
Tag568:ACCGATGGTC
Tag569:ACCGCAATTA
Tag570:ACCGCACGTT
Tag571:ACCGCATAAC
Tag572:ACCGCCATAT
Tag573:ACCGCCTCTT
Tag574:ACCGCGCTAA
Tag575:ACCGCTAAGG
Tag576:ACCGCTAGCA
Tag577:ACCGCTCATC
Tag578:ACCGCTGTAC
Tag579:ACCGCTTCAA
Tag580:ACCGGAACAG
Tag581:ACCGGACCTA
Tag582:ACCGGAGATG
Tag583:ACCGGAGTAA
Tag584:ACCGGATTGT
Tag585:ACCGGCGAAT
Tag586:ACCGGCTTAG
Tag587:ACCGGTACGA
Tag588:ACCGGTAGTT
Tag589:ACCGGTATCC
Tag590:ACCGGTCAAG
Tag591:ACCGGTTACT
Tag592:ACCGTAACGC
Tag593:ACCGTAAGAT
Tag594:ACCGTACACT
Tag595:ACCGTATTCG
Tag596:ACCGTCCAAC
Tag597:ACCGTCTATA
Tag598:ACCGTGCCAT
Tag599:ACCGTGCTTC
Tag600:ACCGTGGAGT
Tag601:ACCGTGTGAA
Tag602:ACCGTTCCTG
Tag603:ACCGTTGACC
Tag604:ACCTAACCGA
Tag605:ACCTAAGAGC
Tag606:ACCTAAGGTA
Tag607:ACCTAATGCC
Tag608:ACCTACAACA
Tag609:ACCTACCAGG
Tag610:ACCTACCTAA
Tag611:ACCTACGTCG
Tag612:ACCTACTGGA
Tag613:ACCTAGAATG
Tag614:ACCTAGACAA
Tag615:ACCTAGCGAC
Tag616:ACCTAGCTGT
Tag617:ACCTAGGTTC
Tag618:ACCTATACCT
Tag619:ACCTATCGCA
Tag620:ACCTATTCTC
Tag621:ACCTCAACGT
Tag622:ACCTCAAGAA
Tag623:ACCTCACATA
Tag624:ACCTCACCAC
Tag625:ACCTCAGTAT
Tag626:ACCTCATTGA
Tag627:ACCTCCAATT
Tag628:ACCTCCGCTA
Tag629:ACCTCCTTCT
Tag630:ACCTCGAACC
Tag631:ACCTCGCAAG
Tag632:ACCTCGTGGT
Tag633:ACCTCGTTAC
Tag634:ACCTCTAGTC
Tag635:ACCTCTCCTT
Tag636:ACCTCTGACA
Tag637:ACCTCTTATG
Tag638:ACCTGAAGCT
Tag639:ACCTGACACG
Tag640:ACCTGAGTGG
Tag641:ACCTGATATC
Tag642:ACCTGCACTC
Tag643:ACCTGCGAGA
Tag644:ACCTGCGGTT
Tag645:ACCTGGATAG
Tag646:ACCTGGCGTA
Tag647:ACCTGGTAAT
Tag648:ACCTGGTCCA
Tag649:ACCTGTCAGC
Tag650:ACCTGTCTTG
Tag651:ACCTGTTCGT
Tag652:ACCTTACGAG
Tag653:ACCTTAGCCG
Tag654:ACCTTCCGGT
Tag655:ACCTTCGGAC
Tag656:ACCTTCTCAG
Tag657:ACCTTGAAGA
Tag658:ACCTTGACTT
Tag659:ACCTTGTACG
Tag660:ACCTTGTGTC
Tag661:ACGAACACCG
Tag662:ACGAACATAC
Tag663:ACGAACCATT
Tag664:ACGAACGAGC
Tag665:ACGAACGGAT
Tag666:ACGAACGTTG
Tag667:ACGAACTCAA
Tag668:ACGAACTTCT
Tag669:ACGAAGACAT
Tag670:ACGAAGAGTA
Tag671:ACGAAGCGCT
Tag672:ACGAAGGACG
Tag673:ACGAATAAGG
Tag674:ACGAATCCTA
Tag675:ACGAATGTCA
Tag676:ACGAATTACC
Tag677:ACGAATTGGA
Tag678:ACGACAATGA
Tag679:ACGACAGCCA
Tag680:ACGACATAGT
Tag681:ACGACCGTAA
Tag682:ACGACGCTTC
Tag683:AACGACTGTA
Tag684:AACGAGATGA
Tag685:AACGAGCCTC
Tag686:AACGATCTCC
Tag687:AACGATGAGG
Tag688:AACGATGCCA
Tag689:AACGCACGAG
Tag690:AACGCAGAAT
Tag691:AACGCAGCTA
Tag692:AACGCCATTC
Tag693:AACGCCGTCA
Tag694:AACGCCTTGT
Tag695:AACGCGACTG
Tag696:AACGCGTATA
Tag697:AACGCTCTGA
Tag698:AACGCTGGAA
Tag699:AACGCTTACC
Tag700:AACGGAGACA
Tag701:AACGGATAAG
Tag702:AACGGATCGC
Tag703:AACGGATGTT
Tag704:AACGGCGTTG
Tag705:AACGGTACAT
Tag706:AACGTAATCC
Tag707:AACGTAGGCT
Tag708:AACGTATGGA
Tag709:AACGTCACAA
Tag710:AACGTCCAGT
Tag711:AACGTCCTTA
Tag712:AACGTGAACG
Tag713:AACGTGTCAC
Tag714:AACGTTCCGC
Tag715:AACGTTGTTC
Tag716:AACTAACGCT
Tag717:AACTACAGTG
Tag718:AACTAGGTCA
Tag719:AACTATGACC
Tag720:AACTCACTCA
Tag721:AACTCATGTC
Tag722:AACTCCAAGA
Tag723:AACTCCGATC
Tag724:AACTCCGGAG
Tag725:AACTCCTCGG
Tag726:AACTCGACAT
Tag727:AACTCGTGCA
Tag728:AACTCTAACG
Tag729:AACTCTCTAC
Tag730:AACTCTGGCT
Tag731:AACTGACCGT
Tag732:AACTGAGTTC
Tag733:AACTGCAGCC
Tag734:AACTGCCATG
Tag735:AACTGCTCTT
Tag736:AACTGCTTCA
Tag737:AACTGGTAGA
Tag738:AACTGTACGG
Tag739:AACTTACACC
Tag740:AACTTCGGTA
Tag741:AACTTCTTGC
Tag742:AACTTGAGAG
Tag743:AACTTGCCAA
Tag744:AACTTGGTGT
Tag745:AAGAACACTC
Tag746:AAGAACCAAG
Tag747:AAGAACCTGT
Tag748:AAGAACGGTA
Tag749:AAGAAGAGCC
Tag750:AAGAAGCAGA
Tag751:AAGAAGGCGG
Tag752:AAGAAGTCAC
Tag753:AAGAATCGGC
Tag754:AAGAATTCCG
Tag755:AAGACAACAG
Tag756:AAGACACGAT
Tag757:AAGACAGCTT
Tag758:AAGACATGCG
Tag759:AAGACCGAGA
Tag760:AAGACCTTCA
Tag761:AAGACGAACT
Tag762:AAGACGACGC
Tag763:AAGACGCTAA
Tag764:AAGACGTATG
Tag765:AAGACGTGGA
Tag766:AAGACTAGAC
Tag767:AAGACTCTCG
Tag768:AAGACTGTGC
Tag769:AAGAGAAGGT
Tag770:AAGAGACACA
Tag771:AAGAGAGAAG
Tag772:AAGAGAGTCT
Tag773:AAGAGCACCT
Tag774:AAGAGCATTG
Tag775:AAGAGCTCGC
Tag776:AAGAGGATAC
Tag777:AAGAGGCCAT
Tag778:AAGAGGTGTT
Tag779:AAGAGTACGA
Tag780:AAGAGTCAGG
Tag781:AAGAGTGGTC
Tag782:AAGATACAGC
Tag783:AAGATCCGTC
Tag784:AAGATCTGAG
Tag785:AAGATGACTG
Tag786:AAGATGGAGT
Tag787:AAGATGGCAA
Tag788:AAGATGTTCC
Tag789:AAGATTCCAC
Tag790:AAGATTGACC
Tag791:AAGCAACTCG
Tag792:AAGCAATGAC
Tag793:AAGCACACGG
Tag794:AAGCACGACA
Tag795:AAGCACTAGT
Tag796:AAGCAGATGT
Tag797:AAGCAGGCTC
Tag798:AAGCAGTCCA
Tag799:AAGCATATCC
Tag800:AAGCATCCTG
Tag801:AAGCATGGTT
Tag802:AAGCATGTGA
Tag803:AAGCCAAGAA
Tag804:AAGCCACCGA
Tag805:AAGCCAGACC
Tag806:AAGCCAGTTA
Tag807:AAGCCGAATC
Tag808:AAGCCGGTAG
Tag809:AAGCCGTCTT
Tag810:AAGCCTACCT
Tag811:AAGCCTATTG
Tag812:AAGCCTTAAC
Tag813:AAGCGAAGCC
Tag814:AAGCGACAAT
Tag815:AAGCGAGCGT
Tag816:AAGCGATAGA
Tag817:AAGCGCGCAA
Tag818:AAGCGCGTTC
Tag819:AAGCGCTTAG
Tag820:AAGCGGATTA
Tag821:AAGCGGTACC
Tag822:AAGCGGTGAA
Tag823:AAGCGTACAG
Tag824:AAGCGTCTGC
Tag825:AAGCGTGTCG
Tag826:AAGCTAACAC
Tag827:AAGCTAATGG
Tag828:AAGCTAGCTG
Tag829:AAGCTCCAAC
Tag830:AAGCTCGCCT
Tag831:AAGCTGAGCA
Tag832:AAGCTGCACG
Tag833:AAGCTGCTAT
Tag834:AAGCTTCGAG
Tag835:AAGCTTGTAC
Tag836:AAGGAACATG
Tag837:AAGGAAGGAG
Tag838:AAGGAATAGC
Tag839:AAGGACCGCA
Tag840:AAGGACCTAC
Tag841:AAGGACTCAG
Tag842:AAGGAGACTT
Tag843:AAGGAGCCAA
Tag844:AAGGAGGAAT
Tag845:AAGGAGGTCG
Tag846:AAGGATAGTG
Tag847:AAGGATGCAC
Tag848:AAGGATTGCT
Tag849:AAGGCAACCA
Tag850:AAGGCAAGTT
Tag851:AAGGCACAAC
Tag852:AAGGCACTGG
Tag853:AAGGCATCTC
Tag854:AAGGCCAGGA
Tag855:AAGGCCGAAG
Tag856:AAGGCCTGAT
Tag857:AAGGCGATAT
Tag858:AAGGCGCAGT
Tag859:AAGGCTAAGC
Tag860:AAGGCTCCAT
Tag861:AAGGCTCGTA
Tag862:AAGGTACCGT
Tag863:AAGGTACGCC
Tag864:AAGGTAGAGG
Tag865:AAGGTAGGTA
Tag866:AAGGTCAATG
Tag867:AAGGTCAGAC
Tag868:AAGGTCATCA
Tag869:AAGGTCGTGT
Tag870:AAGGTGAAGA
Tag871:AAGGTGATTC
Tag872:AAGGTGTACT
Tag873:AAGGTGTTAG
Tag874:AAGGTTACGG
Tag875:AAGGTTGGAT
Tag876:AAGTAACGTC
Tag877:AAGTAAGGCA
Tag878:AAGTACTCGA
Tag879:AAGTACTTCC
Tag880:AAGTAGAAGC
Tag881:AAGTAGCGAT
Tag882:AAGTATCACG
Tag883:AAGTCACACT
Tag884:AAGTCAGTCG
Tag885:AAGTCCATAG
Tag886:AAGTCCGCAC
Tag887:AAGTCGACCG
Tag888:AAGTCGGCTA
Tag889:AAGTCGTTCT
Tag890:AAGTCTACTC
Tag891:AAGTCTCGGT
Tag892:AAGTCTTGTG
Tag893:AAGTGAGGTT
Tag894:AAGTGATCCA
Tag895:AAGTGCAATC
Tag896:AAGTGCAGAA
Tag897:AAGTGCCGCT
Tag898:AAGTGGCATT
Tag899:AAGTGGCCGA
Tag900:AAGTGGTGGC
Tag901:AAGTGTAGCG
Tag902:AAGTGTGAAC
Tag903:AAGTTACCAG
Tag904:AAGTTAGGAC
Tag905:AAGTTATCGC
Tag906:AAGTTCCTCG
Tag907:AAGTTCGCGG
Tag908:AAGTTGACGT
Tag909:AAGTTGGTTG
Tag910:ACTGGACAGC
Tag911:ACTGGACTCA
Tag912:ACTGGAGACT
Tag913:ACTGGAGGAG
Tag914:ACTGGATCCG
Tag915:ACTGGATGTA
Tag916:ACTGGCAAGA
Tag917:ACTGGCACTT
Tag918:ACTGGCCGAA
Tag919:ACTGGCTAAC
Tag920:ACTGGTCCTC
Tag921:ACTGGTCGGT
Tag922:ACTGGTGCAA
Tag923:ACTGGTGTCG
Tag924:ACTGGTTATG
Tag925:ACTGTAAGCA
Tag926:ACTGTAATGG
Tag927:ACTGTACAAG
Tag928:ACTGTAGCTG
Tag929:ACTGTATCAC
Tag930:ACTGTCAATC
Tag931:ACTGTCCGCT
Tag932:ACTGTCGACG
Tag933:ACTGTCGTTA
Tag934:ACTGTCTGGA
Tag935:ACTGTGAGGC
Tag936:ACTGTGATCT
Tag937:ACTGTGCACC
Tag938:ACTGTGCCTA
Tag939:ACTGTGTGTT
Tag940:ACTGTTCTGC
Tag941:ACTTAACCTC
Tag942:ACTTAACGCG
Tag943:ACTTAAGGAC
Tag944:ACTTACACGA
Tag945:ACTTACAGCT
Tag946:ACTTACCAAC
Tag947:ACTTACGGTG
Tag948:ACTTACTTGG
Tag949:ACTTAGATCG
Tag950:ACTTAGCCAT
Tag951:ACTTAGCGGA
Tag952:ACTTAGGAGT
Tag953:ACTTATCCGG
Tag954:ACTTATCTCC
Tag955:ACTTCAACAG
Tag956:ACTTCAAGCC
Tag957:ACTTCACTGC
Tag958:ACTTCAGGTT
Tag959:ACTTCATTCG
Tag960:ACTTCCAAGG
Tag961:ACTTCCGAAT
Tag962:ACTTCCGGCA
Tag963:ACTTCCGTTC
Tag964:ACTTCCTACC
Tag965:ACTTCCTCTG
Tag966:ACTTCGACCT
Tag967:ACTTCGATGA
Tag968:ACTTCGTCAA
Tag969:ACTTCTCGTA
Tag970:ACTTCTGAGC
Tag971:ACTTCTGCCG
Tag972:ACTTGAACCA
Tag973:ACTTGAAGTG
Tag974:ACTTGACTAG
Tag975:ACTTGAGCGT
Tag976:ACTTGAGTCC
Tag977:ACTTGCATAC
Tag978:ACTTGCCTGT
Tag979:ACTTGCGCAG
Tag980:ACTTGGACGG
Tag981:ACTTGGAGAA
Tag982:ACTTGGCTTC
Tag983:ACTTGGTAGC
Tag984:ACTTGTCACT
Tag985:ACTTGTGTGA
Tag986:ACTTGTTGCG
Tag987:AGAACAACCA
Tag988:AGAACAAGGT
Tag989:AGAACACAGC
Tag990:AGAACACGAA
Tag991:AGAACACTTG
Tag992:AGAACAGTGA
Tag993:AGAACCGAGT
Tag994:AGAACCGCTA
Tag995:AGAACCGGAC
Tag996:AGAACCTACA
Tag997:AGAACCTCGC
Tag998:AGAACGAGAG
Tag999:AGAACGATCT
Tag1000:AGAACGCAAT
Tag1001:AGAACGCGTC
Tag1002:AGAACGTCCG
Tag1003:AGAACTAACG
Tag1004:AGAACTCCAC
Tag1005:AGAACTGCCT
Tag1006:AGAACTGGTG
Tag1007:AGAAGAACGC
Tag1008:AGAAGAAGTG
Tag1009:AGAAGACCTA
Tag1010:AGAAGATGCA
Tag1011:AGAAGATTGG
Tag1012:AGAAGCATAG
Tag1013:AGAAGCCACC
Tag1014:AGAAGCTCAT
Tag1015:AGAAGGAACA
Tag1016:AGAAGGACTT
Tag1017:AGAAGGCCAG
Tag1018:AGAAGGTAGC
Tag1019:AGAAGTAGGA
Tag1020:AGAAGTATCC
Tag1021:AGAAGTCTGT
Tag1022:AGAAGTGAAG
Tag1023:AGAAGTGCTC
Tag1024:AGAAGTTGAC
Tag1025:AGAATAAGCC
Tag1026:AGAATCACCT
Tag1027:AGAATCCGCG
Tag1028:AGAATCCTTC
Tag1029:AGAATCGGTT
Tag1030:AGAATGACAC
Tag1031:AGAATGCCGA
Tag1032:AGAATGGAGG
Tag1033:AGAATGGTCC
Tag1034:AGAATGTGGT
Tag1035:AGAATTACGG
Tag1036:AGACAAGCAA
Tag1037:AGACAAGTCG
Tag1038:AGACACATTC
Tag1039:AGACACCAGG
Tag1040:AGACACGGCA
Tag1041:AGACACTACC
Tag1042:AGACACTCTA
Tag1043:AGACAGACGT
Tag1044:AGACAGCGAG
Tag1045:AGACAGGAAT
Tag1046:AGACAGGCTG
Tag1047:AGACAGTGGC
Tag1048:AGACAGTTCT
Tag1049:AGACATATGG
Tag1050:AGACATCAAC
Tag1051:AGACCAAGTA
Tag1052:AGACCACACG
Tag1053:AGACCAGAAC
Tag1054:AGACCATCTT
Tag1055:AGACCATGCC
Tag1056:AGACCATTAG
Tag1057:AGACCGAATG
Tag1058:AGACCGGTTC
Tag1059:AGACCGTGAT
Tag1060:AGACCTAGCT
Tag1061:AGACCTCCGT
Tag1062:AGACCTGAGG
Tag1063:AGACCTTGGA
Tag1064:AGACGACAGA
Tag1065:AGACGAGGTC
Tag1066:AGACGCCGAT
Tag1067:AGACGCGCTT
Tag1068:AGACGCTGTG
Tag1069:AGACGGCATC
Tag1070:AGACGGTACG
Tag1071:AGACGGTCAA
Tag1072:AGACGTACCA
Tag1073:AGACGTGTTA
Tag1074:AGACGTTAGT
Tag1075:AGACTAACTC
Tag1076:AGACTACTGT
Tag1077:AGACTAGATG
Tag1078:AGACTATAGC
Tag1079:AGACTATCCG
Tag1080:AGACTCAGGT
Tag1081:AGACTCCATA
Tag1082:AGACTCGCGA
Tag1083:AGACTCGTCT
Tag1084:AGACTGATCA
Tag1085:AGACTGCTAC
Tag1086:AGACTGTTGG
Tag1087:AGACTTCGAA
Tag1088:AGACTTGCAT
Tag1089:AGACTTGGCC
Tag1090:AGAGAACCAT
Tag1091:AGAGAACTGA
Tag1092:AGAGAAGACT
Tag1093:AGAGAAGTTC
Tag1094:AGAGAATAGG
Tag1095:AGAGACAATG
Tag1096:AGAGACAGCC
Tag1097:AGAGACCGTT
Tag1098:AGAGACTTAC
Tag1099:AGAGAGACCG
Tag1100:AGAGATACTC
Tag1101:AGAGATGAGC
Tag1102:AGAGATGGTA
Tag1103:AGAGATTCAG
Tag1104:AGAGCAGTAT
Tag1105:AGAGCCAAGC
Tag1106:AGAGCCATAA
Tag1107:AGAGCCTCTG
Tag1108:AGAGCGACTA
Tag1109:AGAGCGGAAG
Tag1110:AGAGCGTCAC
Tag1111:AGAGCGTTGA
Tag1112:AGAGCTCAGA
Tag1113:AGAGCTCTCC
Tag1114:AGAGCTTGTT
Tag1115:AGAGGAATCG
Tag1116:AGAGGAGCAG
Tag1117:AGAGGATCCT
Tag1118:AGAGGCACGA
Tag1119:AGAGGCCTCA
Tag1120:AGAGGCTATT
Tag1121:AGAGGTCGAG
Tag1122:AGAGGTGCGT
Tag1123:AGAGGTTACA
Tag1124:AGAGTAATGC
Tag1125:AGAGTACCGG
Tag1126:AGAGTACGCT
Tag1127:AGAGTAGTCA
Tag1128:AGAGTATGTG
Tag1129:AGAGTCCAAT
Tag1130:AGAGTCGATC
Tag1131:AGAGTCGTGG
Tag1132:AGAGTCTACG
Tag1133:AGAGTCTGAA
Tag1134:AGAGTGAACC
Tag1135:AGAGTGCATG
Tag1136:AGAGTTCCTA
Tag1137:AGAGTTCGGC
Tag1138:AGATAACCGC
Tag1139:AGATAACGTG
Tag1140:AGATACATCG
Tag1141:AGATAGAGCT
Tag1142:AGATAGCACA
Tag1143:AGATAGCCTT
Tag1144:AGATAGGCGA
Tag1145:AGATATCGGA
Tag1146:AGATCAACAC
Tag1147:AGATCAGTCC
Tag1148:AGATCCACGG
Tag1149:AGATCCAGTT
Tag1150:AGATCGAAGT
Tag1151:AGATCGCTCG
Tag1152:AGATCGGATA
Tag1153:AGATCTCATC
Tag1154:AGATCTGCGC
Tag1155:AGATCTTCCA
Tag1156:AGATGACTCT
Tag1157:AGATGCAGGC
Tag1158:AGATGCCTGG
Tag1159:AGATGCGACG
Tag1160:AGATGCGTTC
Tag1161:AGATGGATTG
Tag1162:AGATGGTGGA
Tag1163:AGATGTAAGG
Tag1164:AGATGTTCTG
Tag1165:AGATTAGCGT
Tag1166:AGATTAGGAG
Tag1167:AGATTCAGCA
Tag1168:AGATTCTGTC
Tag1169:AGATTGGAAC
Tag1170:AGATTGTGCG
Tag1171:AGCAACGTAT
Tag1172:AGCAACTAGA
Tag1173:AGCAAGATAC
Tag1174:AGCAAGGTGG
Tag1175:AGCAAGTGTT
Tag1176:AGCAATACTG
Tag1177:AGCAATCAGG
Tag1178:AGCAATGGCT
Tag1179:AGCAATTCAC
Tag1180:AGCACAATGC
Tag1181:AGCACAGCAT
Tag1182:AGCACATGAG
Tag1183:AGCACCAGTC
Tag1184:AGCACCGTTG
Tag1185:AGCACCTATT
Tag1186:AGCACCTTAA
Tag1187:AGCACGATTA
Tag1188:AGCACTGTCC
Tag1189:AGCAGACATT
Tag1190:AGCAGAGCGA
Tag1191:AGCAGAGTAG
Tag1192:AGCAGATCCG
Tag1193:AGCAGCAAGG
Tag1194:AGCAGCACAA
Tag1195:AGCAGCGGTA
Tag1196:ACGACGGTGT
Tag1197:ACGACGTCAG
Tag1198:ACGACTAACA
Tag1199:ACGACTTCGC
Tag1200:ACGAGACGTC
Tag1201:ACGAGATATG
Tag1202:ACGAGCAGGA
Tag1203:ACGAGCTGAC
Tag1204:ACGAGGACCA
Tag1205:ACGAGGATGG
Tag1206:ACGAGGCGAA
Tag1207:ACGAGGTACT
Tag1208:ACGAGTAGAT
Tag1209:ACGATATTGC
Tag1210:ACGATCACTT
Tag1211:ACGATCCACA
Tag1212:ACGATCTCGG
Tag1213:ACGATGCAAC
Tag1214:ACGATGCGTG
Tag1215:ACGATGGTTA
Tag1216:ACGATTACAG
Tag1217:ACGATTGATG
Tag1218:ACGATTGGCT
Tag1219:ACGCAACACA
Tag1220:ACGCAAGAAG
Tag1221:ACGCAAGTTC
Tag1222:ACGCAATCAT
Tag1223:ACGCAATGTG
Tag1224:ACGCACTATA
Tag1225:ACGCAGCAGT
Tag1226:ACGCAGTTAG
Tag1227:ACGCATAGGC
Tag1228:ACGCATGTAT
Tag1229:ACGCCAACTA
Tag1230:ACGCCAATCC
Tag1231:ACGCCACATT
Tag1232:ACGCCATACG
Tag1233:ACGCCGAGAT
Tag1234:ACGCCGTGTA
Tag1235:ACGCCTCAAG
Tag1236:ACGCCTCTCA
Tag1237:ACGCCTGACT
Tag1238:ACGCCTTCTG
Tag1239:ACGCGAGTCA
Tag1240:ACGCGCTGTT
Tag1241:ACGCGCTTGA
Tag1242:ACGCGGACTT
Tag1243:ACGCGTAATC
Tag1244:ACGCGTGAGA
Tag1245:ACGCGTTCAC
Tag1246:ACGCTACGCT
Tag1247:ACGCTACTAG
Tag1248:ACGCTCAGTG
Tag1249:ACGCTCATAA
Tag1250:ACGCTCCTGT
Tag1251:ACGCTCGATT
Tag1252:ACGCTGATGC
Tag1253:ACGCTGCCAA
Tag1254:ACGCTGTAGG
Tag1255:ACGCTTAACG
Tag1256:ACGCTTGGTA
Tag1257:ACGGAACTGC
Tag1258:ACGGAAGCAA
Tag1259:ACGGAATACT
Tag1260:ACGGAATCGG
Tag1261:ACGGACCAGA
Tag1262:ACGGAGAATC
Tag1263:ACGGAGAGGT
Tag1264:ACGGAGTTGA
Tag1265:ACGGATACCA
Tag1266:ACGGATCAAT
Tag1267:ACGGCATTAA
Tag1268:ACGGCCTACA
Tag1269:ACGGCGACAA
Tag1270:ACGGCTAATT
Tag1271:ACGGCTAGAG
Tag1272:ACGGCTCTTG
Tag1273:ACGGTAACCT
Tag1274:ACGGTACTTA
Tag1275:ACGGTCGCAT
Tag1276:ACGGTGGACA
Tag1277:ACGGTTAGGA
Tag1278:ACGGTTATAC
Tag1279:ACGGTTCGTC
Tag1280:ACGTAACGAA
Tag1281:ACGTAAGCTT
Tag1282:ACGTAAGTGA
Tag1283:ACGTAGCTCA
Tag1284:ACGTAGGATA
Tag1285:ACGTAGGCAC
Tag1286:ACGTAGTCCG
Tag1287:ACGTATACTG
Tag1288:ACGTCACCTG
Tag1289:ACGTCAGAAC
Tag1290:ACGTCATGAG
Tag1291:ACGTCCTTGC
Tag1292:ACGTCGCAGA
Tag1293:ACGTCTACGA
Tag1294:ACGTCTATCT
Tag1295:ACGTGAACAC
Tag1296:ACGTGACAGT
Tag1297:ACGTGCATCG
Tag1298:ACGTGCGACT
Tag1299:ACGTGCTTAT
Tag1300:ACGTGTAGTA
Tag1301:ACGTGTCTAA
Tag1302:ACGTTAAGGT
Tag1303:ACGTTCACCA
Tag1304:ACGTTCCATC
Tag1305:ACGTTCGAAG
Tag1306:ACGTTGAACT
Tag1307:ACGTTGTCGA
Tag1308:ACTAACCGCC
Tag1309:ACTAAGCATC
Tag1310:ACTAAGGCTG
Tag1311:ACTAAGTCGT
Tag1312:ACTAAGTTCC
Tag1313:ACTACCGCGA
Tag1314:ACTACCTTAC
Tag1315:ACTACGCTAT
Tag1316:ACTACTATCC
Tag1317:ACTACTCCGT
Tag1318:ACTACTTGCT
Tag1319:ACTAGCACGC
Tag1320:ACTAGCGGCT
Tag1321:ACTAGTAGTC
Tag1322:ACTAGTTCGA
Tag1323:ACTATACGAC
Tag1324:ACTATCCTGA
Tag1325:ACTATCGGAG
Tag1326:ACTATGCTCG
Tag1327:ACTATGGACT
Tag1328:ACTCAACGGC
Tag1329:ACTCAAGTGG
Tag1330:ACTCAATACC
Tag1331:ACTCACAACG
Tag1332:ACTCACATGT
Tag1333:ACTCACCGAG
Tag1334:ACTCACGCCA
Tag1335:ACTCAGTAGA
Tag1336:ACTCAGTGCT
Tag1337:ACTCATGCGC
Tag1338:ACTCCACTAA
Tag1339:ACTCCAGACA
Tag1340:ACTCCATCGA
Tag1341:ACTCCGAAGC
Tag1342:ACTCCGACTG
Tag1343:ACTCCGGATT
Tag1344:ACTCCTATGG
Tag1345:ACTCCTGGAC
Tag1346:ACTCGAAGGT
Tag1347:ACTCGAGATC
Tag1348:ACTCGATTCT
Tag1349:ACTCGCCACA
Tag1350:ACTCGCGGTA
Tag1351:ACTCGGTGAG
Tag1352:ACTCGTCCAG
Tag1353:ACTCTACTTC
Tag1354:ACTCTAGGAA
Tag1355:ACTCTCGTGC
Tag1356:ACTCTCTAAG
Tag1357:ACTCTGCATG
Tag1358:ACTCTTACAC
Tag1359:ACTCTTGTCA
Tag1360:ACTGACGATT
Tag1361:ACTGAGTAAG
Tag1362:ACTGATTGCA
Tag1363:ACTGCCTGAG
Tag1364:ACTGCGGAAC
Tag1365:ACTGCGTAGT
Tag1366:AGCAGGAGCT
Tag1367:AGCAGGCTAA
Tag1368:AGCAGGTTCC
Tag1369:AGCATACAAG
Tag1370:AGCATACGCA
Tag1371:AGCATAGACC
Tag1372:AGCATATCGT
Tag1373:AGCATCATCA
Tag1374:AGCATCGTGC
Tag1375:AGCATGCCTC
Tag1376:AGCATGCTGT
Tag1377:AGCATGGCAG
Tag1378:AGCATGTAAC
Tag1379:AGCATTCTTG
Tag1380:AGCATTGAGA
Tag1381:AGCCAACCTT
Tag1382:AGCCAACTGG
Tag1383:AGCCAAGAGT
Tag1384:AGCCAAGGAC
Tag1385:AGCCACAACT
Tag1386:AGCCACCTAC
Tag1387:AGCCACGAAG
Tag1388:AGCCACGGTT
Tag1389:AGCCACTCGT
Tag1390:AGCCACTTCA
Tag1391:AGCCAGTAGG
Tag1392:AGCCAGTGAA
Tag1393:AGCCATAAGC
Tag1394:AGCCATACAT
Tag1395:AGCCATTGCG
Tag1396:AGCCGAAGTT
Tag1397:AGCCGATACC
Tag1398:AGCCGGATAT
Tag1399:AGCCGGTTGA
Tag1400:AGCCGTAATA
Tag1401:AGCCGTCTAG
Tag1402:AGCCGTGTGT
Tag1403:AGCCGTTCTC
Tag1404:AGCCTAACAG
Tag1405:AGCCTATCTA
Tag1406:AGCCTCACTT
Tag1407:AGCCTCCTGA
Tag1408:AGCCTCGGAA
Tag1409:AGCCTCTGCT
Tag1410:AGCCTGACGA
Tag1411:AGCCTGCAAT
Tag1412:AGCCTGGATC
Tag1413:AGCCTTAGCA
Tag1414:AGCCTTATTC
Tag1415:AGCCTTGGTG
Tag1416:AGCGAAGCTG
Tag1417:AGCGAAGGCA
Tag1418:AGCGAATGAT
Tag1419:AGCGACACAC
Tag1420:AGCGACAGGT
Tag1421:AGCGACTATC
Tag1422:AGCGAGCTCT
Tag1423:AGCGAGGATT
Tag1424:AGCGAGTTGC
Tag1425:AGCGATAACG
Tag1426:AGCGATCGAA
Tag1427:AGCGATTCCT
Tag1428:AGCGCAACTC
Tag1429:AGCGCACATG
Tag1430:AGCGCAGAGA
Tag1431:AGCGCATCCA
Tag1432:AGCGCGATAG
Tag1433:AGCGCGTACT
Tag1434:AGCGCTAGAC
Tag1435:AGCGCTATGT
Tag1436:AGCGGAACGT
Tag1437:AGCGGTATAA
Tag1438:AGCGGTCAGT
Tag1439:AGCGGTGCTA
Tag1440:AGCGGTGGAT
Tag1441:AGCGTAATTG
Tag1442:AGCGTACGTC
Tag1443:AGCGTAGCAA
Tag1444:AGCGTATTAC
Tag1445:AGCGTCTCAT
Tag1446:AGCGTGACCT
Tag1447:AGCGTTGTAG
Tag1448:AGCTAAGCCT
Tag1449:AGCTACCAAT
Tag1450:AGCTACCGTA
Tag1451:AGCTACTCTG
Tag1452:AGCTACTGAC
Tag1453:AGCTAGACGG
Tag1454:AGCTATAGAG
Tag1455:AGCTATCTTC
Tag1456:AGCTATTGGT
Tag1457:AGCTCAACCG
Tag1458:AGCTCACGAT
Tag1459:AGCTCATAGT
Tag1460:AGCTCCTACG
Tag1461:AGCTCGAGGA
Tag1462:AGCTCGGCTT
Tag1463:AGCTCGTATC
Tag1464:AGCTCTACAA
Tag1465:AGCTCTGTGA
Tag1466:AGCTCTTGCC
Tag1467:AGCTGAACTA
Tag1468:AGCTGAAGAC
Tag1469:AGCTGACCAG
Tag1470:AGCTGAGAAT
Tag1471:AGCTGAGGTG
Tag1472:AGCTGCATGA
Tag1473:AGCTGTCACA
Tag1474:AGCTGTTAAG
Tag1475:AGCTTAGCTC
Tag1476:AGCTTATGGC
Tag1477:AGCTTCAATG
Tag1478:AGCTTCCAGC
Tag1479:AGCTTCGCCA
Tag1480:AGCTTGCGCT
Tag1481:AGCTTGCTTA
Tag1482:AGGAACAGCA
Tag1483:AGGAACCGTG
Tag1484:AGGAACGCTT
Tag1485:AGGAACTTAG
Tag1486:AGGAAGACGA
Tag1487:AGGAAGCTCC
Tag1488:AGGAAGGATC
Tag1489:AGGAAGGTAA
Tag1490:AGGAAGTAGT
Tag1491:AGGAAGTGCG
Tag1492:AGGAATATCG
Tag1493:AGGAATCCAG
Tag1494:AGGAATTGTC
Tag1495:AGGACACATA
Tag1496:AGGACAGAGG
Tag1497:AGGACATCCT
Tag1498:AGGACCAACC
Tag1499:AGGACCACGT
Tag1500:AGGACCTGTA
Tag1501:AGGACGAGTT
Tag1502:AGGACGGACA
Tag1503:AGGACGTCTC
Tag1504:AGGACTCTAT
Tag1505:AGGACTGAAC
Tag1506:AGGACTTGGT
Tag1507:AGGAGAAGAA
Tag1508:AGGAGACCAC
Tag1509:AGGAGCAATT
Tag1510:AGGAGCATGC
Tag1511:AGGAGGCTTG
Tag1512:AGGAGGTTAT
Tag1513:AGGAGTCACT
Tag1514:AGGAGTCGTA
Tag1515:AGGAGTGCAA
Tag1516:AGGAGTTCTT
Tag1517:AGGATACGGT
Tag1518:AGGATAGCCG
Tag1519:AGGATAGTAC
Tag1520:AGGATCAAGA
Tag1521:AGGATCCTAA
Tag1522:AGGATGATAG
Tag1523:AGGATGTCCA
Tag1524:AGGATTAGGC
Tag1525:AGGCAACGGA
Tag1526:AGGCAATCGC
Tag1527:AGGCACGTGT
Tag1528:AGGCAGAACA
Tag1529:AGGCAGCCAT
Tag1530:AGGCAGCTTA
Tag1531:AGGCATAATG
Tag1532:AGGCATAGAA
Tag1533:AGGCATTACT
Tag1534:AGGCCAATAT
Tag1535:AGGCCATTGA
Tag1536:AGGCCGTTAC
Tag1537:AGGCCTAAGT
Tag1538:AGGCCTCCAA
Tag1539:AGGCCTCTTC
Tag1540:AGGCCTTATA
Tag1541:AGGCGAATTC
Tag1542:AGGCGAGACT
Tag1543:AGGCGATCTG
Tag1544:AGGCGATGGT
Tag1545:AGGCGCTTCT
Tag1546:AGGCGGTATT
Tag1547:AGGCTACACC
Tag1548:AGGCTAGGAT
Tag1549:AGGCTATGCA
Tag1550:AGGCTCATCG
Tag1551:AGGCTCCGTT
Tag1552:AGGCTGAGTC
Tag1553:AGGCTGGAGA
Tag1554:AGGCTGTCAG
Tag1555:AGGCTTCTCT
Tag1556:AGGCTTGAAG
Tag1557:AGGTAACAAC
Tag1558:AGGTAACTGT
Tag1559:AGGTAAGATG
Tag1560:AGGTACAAGT
Tag1561:AGGTACGCAG
Tag1562:AGGTACTACA
Tag1563:AGGTAGACTC
Tag1564:AGGTAGGTCT
Tag1565:AGGTAGTAAG
Tag1566:AGGTATAACC
Tag1567:AGGTATCGTT
Tag1568:AGGTATGAGA
Tag1569:AGGTATGGCG
Tag1570:AGGTATTCGG
Tag1571:AGGTCAAGGC
Tag1572:AGGTCACTAG
Tag1573:AGGTCAGCGA
Tag1574:AGGTCCATTC
Tag1575:AGGTCCGGAA
Tag1576:AGGTCCTGCT
Tag1577:AGGTCGATAA
Tag1578:AGGTCTATGG
Tag1579:AGGTCTCGAC
Tag1580:AGGTCTGATT
Tag1581:AGGTCTTAGC
Tag1582:AGGTGAACGG
Tag1583:AGGTGAATCA
Tag1584:AGGTGAGAGC
Tag1585:AGGTGATGTA
Tag1586:AGGTGCCAAG
Tag1587:AGGTGCCTTA
Tag1588:AGGTGCTCGT
Tag1589:AGGTGGCTAC
Tag1590:AGGTGGTTCG
Tag1591:AGGTGTAGGT
Tag1592:AGGTGTCCTC
Tag1593:AGGTGTGTCC
Tag1594:AGGTTAAGCG
Tag1595:AGGTTACAGA
Tag1596:AGGTTACCTT
Tag1597:AGGTTATTCC
Tag1598:AGGTTCACAC
Tag1599:AGGTTCGGTG
Tag1600:AGGTTCTCCG
Tag1601:AGGTTCTGGA
Tag1602:AGGTTGCGAA
Tag1603:AGGTTGTGTT
Tag1604:AGTAACACGG
Tag1605:AGTAACATCC
Tag1606:AGTAACCACT
Tag1607:AGTAACTGGC
Tag1608:AGTAAGAGTC
Tag1609:AGTAAGCCAA
Tag1610:AGTAAGCGGT
Tag1611:AGTAAGGAGA
Tag1612:AGTAATCGAC
Tag1613:AGTACAACTG
Tag1614:AGTACACGCT
Tag1615:AGTACAGGTA
Tag1616:AGTACCATGA
Tag1617:AGTACCTTCT
Tag1618:AGTACGAAGG
Tag1619:AGTACGACAT
Tag1620:AGTACGCACC
Tag1621:AGTACGGTGC
Tag1622:AGTACGTGAA
Tag1623:AGTACTCAAG
Tag1624:AGTACTCTCA
Tag1625:AGTACTGCGG
Tag1626:AGTACTGGAT
Tag1627:AGTAGAGGAC
Tag1628:AGTAGAGTGT
Tag1629:AGTAGCAGCG
Tag1630:AGTAGCCTAC
Tag1631:AGTAGCTAGT
Tag1632:AGTAGTGTTG
Tag1633:AGTAGTTACC
Tag1634:AGTATATGCG
Tag1635:AGTATCACTC
Tag1636:AGTATCCGAT
Tag1637:AGTATCGCAA
Tag1638:AGTATCTTGG
Tag1639:AGTATGCGTA
Tag1640:AGTATGGCTT
Tag1641:AGTATTCCGC
Tag1642:AGTCAACTCA
Tag1643:AGTCAATCCT
Tag1644:AGTCACAAGA
Tag1645:AGTCACAGTG
Tag1646:AGTCAGAGAT
Tag1647:AGTCAGATGC
Tag1648:AGTCATGACA
Tag1649:AGTCATGTTC
Tag1650:AGTCATTCGA
Tag1651:AGTCCAACAA
Tag1652:AGTCCACATC
Tag1653:AGTCCAGCGT
Tag1654:AGTCCGAACT
Tag1655:AGTCCGCTTG
Tag1656:AGTCCGTCCA
Tag1657:AGTCCGTGTC
Tag1658:AGTCCTAGAG
Tag1659:AGTCCTGTAA
Tag1660:AGTCCTTCAC
Tag1661:AGTCGACGTA
Tag1662:AGTCGAGAAG
Tag1663:AGTCGCATGG
Tag1664:AGTCGCCATT
Tag1665:AGTCGGACAC
Tag1666:AGTCGTACTT
Tag1667:AGTCGTAGGC
Tag1668:AGTCGTCACG
Tag1669:AGTCGTTGAT
Tag1670:AGTCTAAGGA
Tag1671:AGTCTACCAC
Tag1672:AGTCTCGTAG
Tag1673:AGTCTCTCGC
Tag1674:AGTCTGGACG
Tag1675:AGTCTGGTGT
Tag1676:AGTCTTACCG
Tag1677:AGTGAAGCGC
Tag1678:AGTGAATGGA
Tag1679:AGTGAATTCC
Tag1680:AGTGACACCA
Tag1681:AGTGACCTCG
Tag1682:AGTGACGGCT
Tag1683:AGTGAGCAAC
Tag1684:AGTGAGGTCA
Tag1685:AGTGAGTCGG
Tag1686:AGTGATCATG
Tag1687:AGTGCACAAT
Tag1688:AGTGCAGACC
Tag1689:AGTGCCAGTA
Tag1690:AGTGCCGATG
Tag1691:AGTGCGCGTT
Tag1692:AGTGCGGCAA
Tag1693:AGTGCTACCT
Tag1694:AGTGCTATTG
Tag1695:AGTGCTGCTC
Tag1696:AGTGCTTGCG
Tag1697:AGTGGAAGAT
Tag1698:AGTGGACTGG
Tag1699:AGTGGATATC
Tag1700:AGTGGATCAA
Tag1701:AGTGGCGACA
Tag1702:AGTGGCTTGA
Tag1703:AGTGGTAGCA
Tag1704:AGTGGTCCAT
Tag1705:AGTGTACGAA
Tag1706:AGTGTCATAC
Tag1707:AGTGTCGAGT
Tag1708:AGTGTGCAGA
Tag1709:AGTGTGCTAT
Tag1710:AGTGTGTGAG
Tag1711:AGTGTTGGAC
Tag1712:AGTGTTGTCT
Tag1713:AGTTACGAGC
Tag1714:AGTTACGCTA
Tag1715:AGTTAGCGCC
Tag1716:AGTTAGCTGG
Tag1717:AGTTAGTCAC
Tag1718:AGTTCACCGG
Tag1719:AGTTCAGGCG
Tag1720:AGTTCCGCCT
Tag1721:AGTTCCTTAG
Tag1722:AGTTCGGTAT
Tag1723:AGTTCGTCGT
Tag1724:AGTTCGTTCC
Tag1725:AGTTGATAGG
Tag1726:AGTTGCATCT
Tag1727:AGTTGCCGGA
Tag1728:AGTTGGCAAT
Tag1729:AGTTGGCCTA
Tag1730:AGTTGTACAG
Tag1731:AGTTGTCTGC
Tag1732:AGTTGTGATC
Tag1733:AGTTGTGGAA
Tag1734:ATAACAAGCG
Tag1735:ATAACACCAG
Tag1736:ATAACAGGTC
Tag1737:ATAACCACAC
Tag1738:ATAACCGATG
Tag1739:ATAACCGGCA
Tag1740:ATAACCTCCT
Tag1741:ATAACGACGA
Tag1742:ATAACGCTCA
Tag1743:ATAACGGACT
Tag1744:ATAACGGTGG
Tag1745:ATAACTCAGG
Tag1746:ATAACTTGCC
Tag1747:ATAAGAGACC
Tag1748:ATAAGAGCGG
Tag1749:ATAAGCACGT
Tag1750:ATAAGCCTCG
Tag1751:ATAAGCGGAG
Tag1752:ATAAGCGTGC
Tag1753:ATAAGGAGGC
Tag1754:ATAAGGCGCT
Tag1755:ATAAGGTCCA
Tag1756:ATAAGTCCGC
Tag1757:ATAATGCACC
Tag1758:ATACACACCT
Tag1759:ATACACAGAG
Tag1760:ATACACCTGC
Tag1761:ATACAGACTC
Tag1762:ATACAGGACG
Tag1763:ATACAGGTGT
Tag1764:ATACATCGCA
Tag1765:ATACCAATGG
Tag1766:ATACCACTTC
Tag1767:ATACCGAGCC
Tag1768:ATACCGCAAG
Tag1769:ATACCGTAGT
Tag1770:ATACCGTCTA
Tag1771:ATACCTACGC
Tag1772:ATACCTGTGA
Tag1773:ATACGAAGCA
Tag1774:ATACGACGGC
Tag1775:ATACGATCAC
Tag1776:ATACGCAATC
Tag1777:ATACGCGCCA
Tag1778:ATACGCTAGA
Tag1779:ATACGGAGAT
Tag1780:ATACGGCCGT
Tag1781:ATACGGTTAG
Tag1782:ATACGTCATG
Tag1783:ATACGTCTCT
Tag1784:ATACGTGAGC
Tag1785:ATACTACCGA
Tag1786:ATACTAGCAG
Tag1787:ATACTCCTTG
Tag1788:ATACTCGGCG
Tag1789:ATACTGAGTG
Tag1790:ATACTGTTCC
Tag1791:ATAGAACACG
Tag1792:ATAGAAGTGG
Tag1793:ATAGACAGGA
Tag1794:ATAGACCGAC
Tag1795:ATAGACGCTG
Tag1796:ATAGACTCCA
Tag1797:ATAGAGATGC
Tag1798:ATAGAGTTCG
Tag1799:ATAGATCGGT
Tag1800:ATAGATGCCT
Tag1801:ATAGCAAGGC
Tag1802:ATAGCACCTA
Tag1803:ATAGCCAACG
Tag1804:ATAGCCGGTT
Tag1805:ATAGCCTTCC
Tag1806:ATAGCGAGAA
Tag1807:ATAGCGCAGC
Tag1808:ATAGCGTCGG
Tag1809:ATAGCTCTAG
Tag1810:ATAGCTGATC
Tag1811:ATAGCTGCAA
Tag1812:ATAGGACTGT
Tag1813:ATAGGAGCTC
Tag1814:ATAGGATGGA
Tag1815:ATAGGCAGTG
Tag1816:ATAGGCATAC
Tag1817:ATAGGCCACT
Tag1818:ATAGGCGTTA
Tag1819:ATAGGCTTGG
Tag1820:ATAGGTCGTC
Tag1821:ATAGTACGAG
Tag1822:ATAGTCAGCT
Tag1823:ATAGTCTCAC
Tag1824:ATAGTGAAGG
Tag1825:ATAGTGCGCA
Tag1826:ATAGTGGTAG
Tag1827:ATAGTTGTCC
Tag1828:ATATAAGGCG
Tag1829:ATATAGCCGG
Tag1830:ATATCACGGT
Tag1831:ATATCAGAGC
Tag1832:ATATCCGCCG
Tag1833:ATATCCGTAC
Tag1834:ATATCCTGGC
Tag1835:ATATCGACAG
Tag1836:ATATCGCGTG
Tag1837:ATATCGGCTC
Tag1838:ATATGATCCG
Tag1839:ATATGCGAGT
Tag1840:ATATGCTCTC
Tag1841:ATATGGAACG
Tag1842:ATATGGCAGA
Tag1843:ATATGTGTCG
Tag1844:ATATTACGCC
Tag1845:ATATTCTCGG
Tag1846:ATATTGGCCT
Tag1847:ATCAACATCG
Tag1848:ATCAAGCGAT
Tag1849:ATCAATGAGC
Tag1850:ATCAATGGTG
Tag1851:ATCACAGTCT
Tag1852:ATCACATGGA
Tag1853:ATCACCAACA
Tag1854:ATCACCACGG
Tag1855:ATCACCGAAT
Tag1856:ATCACGGCTA
Tag1857:ATCACGTGCG
Tag1858:ATCACTCCAT
Tag1859:ATCACTTCTG
Tag1860:ATCAGAGGCA
Tag1861:ATCAGCGCTC
Tag1862:ATCAGCTTGA
Tag1863:ATCAGGATCA
Tag1864:ATCAGTAACC
Tag1865:ATCAGTCCTA
Tag1866:ATCAGTGGAC
Tag1867:ATCAGTTAGG
Tag1868:ATCATACCGC
Tag1869:ATCATCAGCC
Tag1870:ATCATGACGT
Tag1871:ATCATGCAGG
Tag1872:ATCATGCTAC
Tag1873:ATCATTCGGT
Tag1874:ATCCAACTCT
Tag1875:ATCCAAGCGC
Tag1876:ATCCAAGTAG
Tag1877:ATCCACAAGG
Tag1878:ATCCACCACC
Tag1879:ATCCACCGGT
Tag1880:ATCCACTCAG
Tag1881:ATCCAGCATG
Tag1882:ATCCAGCCGA
Tag1883:ATCCAGGCCT
Tag1884:ATCCAGGTTA
Tag1885:ATCCATCCTC
Tag1886:ATCCATGCAA
Tag1887:ATCCATGTCC
Tag1888:ATCCGAACGG
Tag1889:ATCCGACACA
Tag1890:ATCCGACGAT
Tag1891:ATCCGATCTT
Tag1892:ATCCGCAGCT
Tag1893:ATCCGCCTTC
Tag1894:ATCCGGCAAC
Tag1895:ATCCGGTGCA
Tag1896:ATCCGTATGA
Tag1897:ATCCGTGAAT
Tag1898:ATCCGTTGGC
Tag1899:ATCCTAAGTC
Tag1900:ATCCTAGAAC
Tag1901:ATCCTATACG
Tag1902:ATCCTCAGGA
Tag1903:ATCCTCCGAC
Tag1904:ATCCTCGAGT
Tag1905:ATCCTCGTCA
Tag1906:ATCCTCTTGG
Tag1907:ATCCTGCCAG
Tag1908:ATCGAACCAC
Tag1909:ATCGAATCCG
Tag1910:ATCGACCGTG
Tag1911:ATCGAGACTA
Tag1912:ATCGAGAGAC
Tag1913:ATCGAGTGGT
Tag1914:ATCGATATGG
Tag1915:ATCGCACGCA
Tag1916:ATCGCAGACG
Tag1917:ATCGCCACCT
Tag1918:ATCGCCATGA
Tag1919:ATCGCCTAGG
Tag1920:ATCGCGAAGT
Tag1921:ATCGCGGCAT
Tag1922:ATCGCGGTTC
Tag1923:ATCGCTTCGT
Tag1924:ATCGGAAGCC
Tag1925:ATCGGACAGG
Tag1926:ATCGGAGTGC
Tag1927:ATCGGCAATA
Tag1928:ATCGGCGGAA
Tag1929:ATCGGCTACC
Tag1930:ATCGGTCTAT
Tag1931:ATCGGTTCCA
Tag1932:ATCGTAGCGT
Tag1933:ATCGTATAGC
Tag1934:ATCGTCACTC
Tag1935:ATCGTCTGCA
Tag1936:ATCGTGAGTT
Tag1937:ATCGTGGATG
Tag1938:ATCGTGTTCT
Tag1939:ATCGTTCGCC
Tag1940:ATCTAACCTG
Tag1941:ATCTACATGC
Tag1942:ATCTACGACT
Tag1943:ATCTACGCGG
Tag1944:ATCTACGGTC
Tag1945:ATCTAGAGCG
Tag1946:ATCTAGCTCC
Tag1947:ATCTCACTGG
Tag1948:ATCTCCAGAT
Tag1949:ATCTCCGTGT
Tag1950:ATCTCCTCAA
Tag1951:ATCTCGCATT
Tag1952:ATCTCGCGAA
Tag1953:ATCTCGGAGG
Tag1954:ATCTCGTCCT
Tag1955:ATCTCTCACC
Tag1956:ATCTCTGGTA
Tag1957:ATCTGACGGA
Tag1958:ATCTGAGCAA
Tag1959:ATCTGATGAG
Tag1960:ATCTGGAATC
Tag1961:ATCTGGCCAT
Tag1962:ATCTGGTCGC
Tag1963:ATCTGTGCTT
Tag1964:ATCTTCCACA
Tag1965:ATCTTCCTAG
Tag1966:ATCTTCTGTG
Tag1967:ATCTTGCGGC
Tag1968:ATCTTGGACC
Tag1969:ATCTTGGCGA
Tag1970:ATGAACGGCC
Tag1971:ATGAACTCGT
Tag1972:ATGAATCTGG
Tag1973:ATGACAGCAC
Tag1974:ATGACAGTTG
Tag1975:ATGACCACTA
Tag1976:ATGACCAGGC
Tag1977:ATGACCTAAG
Tag1978:ATGACGATCG
Tag1979:ATGACGCGTA
Tag1980:ATGACTCCTC
Tag1981:ATGACTGCCG
Tag1982:ATGAGAGAGA
Tag1983:ATGAGCCAGT
Tag1984:ATGAGCTACA
Tag1985:ATGAGGCTGC
Tag1986:ATGAGGTAAC
Tag1987:ATGAGTCGCC
Tag1988:ATGAGTTGAG
Tag1989:ATGATACCTG
Tag1990:ATGATATGCC
Tag1991:ATGATCAACG
Tag1992:ATGATCCGGA
Tag1993:ATGATCTAGC
Tag1994:ATGCAACCAG
Tag1995:ATGCAAGCTA
Tag1996:ATGCACGTAC
Tag1997:ATGCACTGAA
Tag1998:ATGCAGAGTT
Tag1999:ATGCATACAC
Tag2000:ATGCATAGCG
Tag2001:ATGCATCAGA
Tag2002:ATGCCACGTG
Tag2003:ATGCCAGAAT
Tag2004:ATGCCATGCT
Tag2005:ATGCCGAAGA
Tag2006:ATGCCGCTCT
Tag2007:ATGCCTTCAT
Tag2008:ATGCCTTGTC
Tag2009:ATGCGAATAG
Tag2010:ATGCGACCTC
Tag2011:ATGCGCCTAA
Tag2012:ATGCGGATCC
Tag2013:ATGCGGTCGA
Tag2014:ATGCGGTGTG
Tag2015:ATGCGTAACT
Tag2016:ATGCGTGGAA
Tag2017:ATGCGTTCCG
Tag2018:ATGCTACAGG
Tag2019:ATGCTACTCA
Tag2020:ATGCTAGTGT
Tag2021:ATGCTCACGC
Tag2022:ATGCTCTCTT
Tag2023:ATGCTGACAT
Tag2024:ATGCTGCGGT
Tag2025:ATGCTTACTG
Tag2026:ATGGAACCGA
Tag2027:ATGGAAGTCA
Tag2028:ATGGACAACA
Tag2029:ATGGACATTC
Tag2030:ATGGACTATG
Tag2031:ATGGAGACGG
Tag2032:ATGGAGCAAG
Tag2033:ATGGAGGACC
Tag2034:ATGGAGTTAC
Tag2035:ATGGATCTCT
Tag2036:ATGGCAATGT
Tag2037:ATGGCACTCC
Tag2038:ATGGCGCCTT
Tag2039:ATGGCGCTGA
Tag2040:ATGGCGTACG
Tag2041:ATGGCTAGCT
Tag2042:ATGGCTGAGG
Tag2043:ATGGCTGGAC
Tag2044:ATGGCTTCTA
Tag2045:ATGGTAACAG
Tag2046:ATGGTATGGT
Tag2047:ATGGTCAGTA
Tag2048:ATGGTCCACC
Tag2049:ATGGTCCTGG
Tag2050:ATGGTCGGAG
Tag2051:ATGGTGACCA
Tag2052:ATGGTGGTGC
Tag2053:ATGGTGTATC
Tag2054:ATGGTTGACT
Tag2055:ATGGTTGTTG
Tag2056:ATGTACCGCG
Tag2057:ATGTAGACCT
Tag2058:ATGTAGCATC
Tag2059:ATGTAGGTGG
Tag2060:ATGTAGTGCA
Tag2061:ATGTATTGGC
Tag2062:ATGTCACCAT
Tag2063:ATGTCAGGCC
Tag2064:ATGTCATCGG
Tag2065:ATGTCCAATG
Tag2066:ATGTCCAGCA
Tag2067:ATGTCCTAGT
Tag2068:ATGTCGAGAC
Tag2069:ATGTGATACC
Tag2070:ATGTGCACAG
Tag2071:ATGTGCCGTC
Tag2072:ATGTGCGATA
Tag2073:ATGTGGAGGA
Tag2074:ATGTGGCGAG
Tag2075:ATGTGGTCTT
Tag2076:ATGTGTAAGC
Tag2077:ATGTGTGGCT
Tag2078:ATGTTAGACG
Tag2079:ATGTTCATCC
Tag2080:ATGTTGCCAC
Tag2081:ATTAACCAGC
Tag2082:ATTAACGCCT
Tag2083:ATTAAGACCG
Tag2084:ATTAAGCGCA
Tag2085:ATTACATCCG
Tag2086:ATTACCAGTG
Tag2087:ATTACCTCTC
Tag2088:ATTACCTGGT
Tag2089:ATTACGCCGC
Tag2090:ATTACGGAAG
Tag2091:ATTAGAGGTG
Tag2092:ATTAGCGAAC
Tag2093:ATTAGGCACG
Tag2094:ATTAGGCCTT
Tag2095:ATTAGGTGCC
Tag2096:ATTATCGTCG
Tag2097:ATTATGGAGC
Tag2098:ATTCAAGGCT
Tag2099:ATTCACCGTC
Tag2100:ATTCACGTGA
Tag2101:ATTCACTTCC
Tag2102:ATTCAGCTAG
Tag2103:ATTCAGTCGC
Tag2104:ATTCCAAGAC
Tag2105:ATTCCACACT
Tag2106:ATTCCAGCTC
Tag2107:ATTCCGATCA
Tag2108:ATTCCTCAGC
Tag2109:ATTCCTCCTA
Tag2110:ATTCCTGACG
Tag2111:ATTCCTTGCA
Tag2112:ATTCGAATGC
Tag2113:ATTCGACCAA
Tag2114:ATTCGACTCG
Tag2115:ATTCGAGAGT
Tag2116:ATTCGCACTA
Tag2117:ATTCGCTCAT
Tag2118:ATTCGGCTTA
Tag2119:ATTCGTAAGG
Tag2120:ATTCGTGTAC
Tag2121:ATTCTATGGC
Tag2122:ATTCTCCACG
Tag2123:ATTCTCGGAT
Tag2124:ATTCTGAACC
Tag2125:ATTCTGCTGC
Tag2126:ATTCTGGCAC
Tag2127:ATTCTGGTTG
Tag2128:ATTCTTCCGG
Tag2129:ATTCTTGCCT
Tag2130:ATTGAAGCAG
Tag2131:ATTGACACGC
Tag2132:ATTGAGCACT
Tag2133:ATTGAGCGGC
Tag2134:ATTGATGCGA
Tag2135:ATTGCAACGG
Tag2136:ATTGCAGCCA
Tag2137:ATTGCATGTC
Tag2138:ATTGCCGAGC
Tag2139:ATTGCCTACT
Tag2140:ATTGCGGCTG
Tag2141:ATTGCGTTAG
Tag2142:ATTGGAACAC
Tag2143:ATTGGATGCT
Tag2144:ATTGGCAGGT
Tag2145:ATTGGCCTGC
Tag2146:ATTGGTAGAG
Tag2147:ATTGGTGGTA
Tag2148:ATTGTACCTC
Tag2149:ATTGTAGGCG
Tag2150:ATTGTCGCGG
Tag2151:ATTGTTCTCG
Tag2152:CAACAACCAT
Tag2153:CAACAACTGA
Tag2154:CAACAAGATG
Tag2155:CAACAAGGCA
Tag2156:CAACAATCCG
Tag2157:CAACAATGTC
Tag2158:CAACACAGGT
Tag2159:CAACACATTG
Tag2160:CAACACCACC
Tag2161:CAACACCGAG
Tag2162:CAACACGAAT
Tag2163:CAACACGCTA
Tag2164:CAACACGTGC
Tag2165:CAACACTTCA
Tag2166:CAACAGACAA
Tag2167:CAACAGAGCG
Tag2168:CAACAGCTCT
Tag2169:CAACAGGTAG
Tag2170:CAACAGTAAC
Tag2171:CAACAGTGGA
Tag2172:CAACATACTC
Tag2173:CAACATCGTT
Tag2174:CAACATGCGG
Tag2175:CAACCAAGCC
Tag2176:CAACCACAAC
Tag2177:CAACCACTCG
Tag2178:CAACCAGCGA
Tag2179:CAACCATACA
Tag2180:CAACCATGAT
Tag2181:CAACCGACGT
Tag2182:CAACCGATTA
Tag2183:CAACCGGATC
Tag2184:CAACCGTGTG
Tag2185:CAACCTAATG
Tag2186:CAACCTAGAA
Tag2187:CAACCTCACT
Tag2188:CAACCTCCAG
Tag2189:CAACCTCTTC
Tag2190:CAACCTTAGC
Tag2191:CAACGAACAG
Tag2192:CAACGAAGTA
Tag2193:CAACGAGACC
Tag2194:CAACGATTCT
Tag2195:CAACGCAAGG
Tag2196:CAACGCACCA
Tag2197:CAACGCCTAC
Tag2198:CAACGCTATT
Tag2199:CAACGGAACT
Tag2200:CAACGGCATA
Tag2201:CAACGGTTAA
Tag2202:CAACGTATCG
Tag2203:CAACGTGAGT
Tag2204:CAACGTTGAC
Tag2205:CAACTACCGC
Tag2206:CAACTAGGAC
Tag2207:CAACTAGTGT
Tag2208:CAACTATAGG
Tag2209:CAACTCATCC
Tag2210:CAACTCGTAA
Tag2211:CAACTCTCGT
Tag2212:CAACTGAAGC
Tag2213:CAACTGACTG
Tag2214:CAACTGCAAT
Tag2215:CAACTGCGCA
Tag2216:CAACTGGCCT
Tag2217:CAACTTACGA
Tag2218:CAACTTCTGG
Tag2219:CAACTTGGCG
Tag2220:CAAGAACGAA
Tag2221:CAAGAACTCC
Tag2222:CAAGAAGCGC
Tag2223:CAAGAATGCT
Tag2224:CAAGAATTGG
Tag2225:CAAGACAAGA
Tag2226:CAAGACACCG
Tag2227:CAAGACCATG
Tag2228:CAAGACGGAC
Tag2229:CAAGACGTCT
Tag2230:CAAGACTCAA
Tag2231:CAAGAGAATC
Tag2232:CAAGAGCCGA
Tag2233:CAAGAGGAGG
Tag2234:CAAGAGGCTT
Tag2235:CAAGATACGT
Tag2236:CAAGATAGAG
Tag2237:CAAGCAATCA
Tag2238:CAAGCACCTT
Tag2239:CAAGCAGACT
Tag2240:CAAGCAGCAG
Tag2241:CAAGCATTAC
Tag2242:CAAGCCAATT
Tag2243:CAAGCCGTGA
Tag2244:CAAGCCTGGT
Tag2245:CAAGCCTTCG
Tag2246:CAAGCGAGGA
Tag2247:CAAGCGCGAT
Tag2248:CAAGCGGTTG
Tag2249:CAAGCTAGTC
Tag2250:CAAGCTCAGG
Tag2251:CAAGCTGATA
Tag2252:CAAGCTTCAT
Tag2253:CAAGGAAGAC
Tag2254:CAAGGACAGT
Tag2255:CAAGGACTTA
Tag2256:CAAGGAGTAT
Tag2257:CAAGGATCGA
Tag2258:CAAGGCATGC
Tag2259:CAAGGCCACA
Tag2260:CAAGGCGGTA
Tag2261:CAAGGCTCTG
Tag2262:CAAGGTAACC
Tag2263:CAAGGTACAA
Tag2264:CAAGGTCCTC
Tag2265:CAAGGTGGCT
Tag2266:CAAGGTGTGG
Tag2267:CAAGTAACGG
Tag2268:CAAGTACTAG
Tag2269:CAAGTAGGTG
Tag2270:CAAGTATCTC
Tag2271:CAAGTCCAGC
Tag2272:CAAGTCGAAG
Tag2273:CAAGTCTGCA
Tag2274:CAAGTGAACA
Tag2275:CAAGTGCGTC
Tag2276:CAAGTGGCAC
Tag2277:CAAGTGTATG
Tag2278:CAAGTTGGAA
Tag2279:CAATAACAGC
Tag2280:CAATAACCTG
Tag2281:CAATAAGGAG
Tag2282:CAATACCTTC
Tag2283:CAATACGACA
Tag2284:CAATACGGTT
Tag2285:CAATACTCCT
Tag2286:CAATAGAGGC
Tag2287:CCGAACAACA
Tag2288:CCGAACAGAG
Tag2289:CCGAACATGT
Tag2290:CCGAACCGTA
Tag2291:CCGAACTCTC
Tag2292:CCGAAGAAGC
Tag2293:CCGAAGACTG
Tag2294:CCGAAGATAA
Tag2295:CCGAAGCAAT
Tag2296:CCGAAGGTTC
Tag2297:CCGAAGTCGA
Tag2298:CCGAATACAC
Tag2299:CCGAATAGCT
Tag2300:CCGAATCTAG
Tag2301:CCGAATGATT
Tag2302:CCGAATTGTG
Tag2303:CCGACAACCT
Tag2304:CCGACAAGTA
Tag2305:CCGACACATC
Tag2306:CCGACACCAA
Tag2307:CCGACAGGAT
Tag2308:CCGACATAAG
Tag2309:CCGACATTCA
Tag2310:CCGACCAATG
Tag2311:CCGACCTACT
Tag2312:CCGACCTGAA
Tag2313:CCGACGTATA
Tag2314:CCGACTATCG
Tag2315:CCGACTCAGA
Tag2316:CCGACTCCTT
Tag2317:CCGAGAACGA
Tag2318:CCGAGAATAC
Tag2319:CCGAGACTTA
Tag2320:CCGAGAGTGT
Tag2321:CCGAGATCAT
Tag2322:CCGAGTAACC
Tag2323:CCGAGTCTCT
Tag2324:CCGAGTGAAG
Tag2325:CCGAGTGCTA
Tag2326:CCGAGTTAGT
Tag2327:CCGATAAGCG
Tag2328:CCGATACGGA
Tag2329:CCGATAGACA
Tag2330:CCGATAGTAG
Tag2331:CCGATATGTC
Tag2332:CCGATCATCC
Tag2333:CCGATCGAAC
Tag2334:CCGATCGGTT
Tag2335:CCGATCTTAT
Tag2336:CCGATGACGT
Tag2337:CCGATGTCAC
Tag2338:CCGATGTTCG
Tag2339:CCGATTATGA
Tag2340:CCGATTCGAT
Tag2341:CCGATTCTTC
Tag2342:CCGCAACGAT
Tag2343:CCGCAACTTG
Tag2344:CCGCAAGTCT
Tag2345:CCGCAATAGG
Tag2346:CCGCAATGCA
Tag2347:CCGCACAATT
Tag2348:CCGCACTTAA
Tag2349:CCGCAGTATC
Tag2350:CCGCATACTA
Tag2351:CCGCATCTGT
Tag2352:CCGCATGGAA
Tag2353:CCGCATTCCT
Tag2354:CCGCCAATAA
Tag2355:CCGCCATGTT
Tag2356:CCGCCGTAAT
Tag2357:CCGCCTATTC
Tag2358:CCGCGAGAAT
Tag2359:CCGCGATTAG
Tag2360:CCGCGTCATT
Tag2361:CCGCGTTACA
Tag2362:CCGCGTTGAT
Tag2363:CCGCTAACAG
Tag2364:CCGCTAATGT
Tag2365:CCGCTACAAC
Tag2366:CCGCTAGCTT
Tag2367:CCGCTCCATA
Tag2368:CCGCTGAAGA
Tag2369:CCGCTGGTAT
Tag2370:CCGCTGTCTA
Tag2371:CCGCTTAGAC
Tag2372:CCGCTTGTTG
Tag2373:CCGGAACATA
Tag2374:CCGGAAGAGT
Tag2375:CCGGAATCTT
Tag2376:CCGGAATTCC
Tag2377:CCGGACTAAC
Tag2378:CCGGATAAGA
Tag2379:CCGGATATAT
Tag2380:CCGGATCCAA
Tag2381:CCGGATGTTA
Tag2382:CCGGCACTAT
Tag2383:CCGGCCATTA
Tag2384:CCGGCTTATC
Tag2385:CCGGTAATCA
Tag2386:CCGGTAGGAA
Tag2387:CCGGTATACG
Tag2388:CCGGTCAACT
Tag2389:CCGGTCTAGA
Tag2390:CCGGTGAGAT
Tag2391:CCGGTGATTG
Tag2392:CCGGTTCATG
Tag2393:CCGGTTGTCT
Tag2394:CCGTAACCAC
Tag2395:CCGTAAGACC
Tag2396:CCGTAAGGTG
Tag2397:CCGTAATGGC
Tag2398:CCGTACAAGG
Tag2399:CCGTACAGTC
Tag2400:CCGTACGAAT
Tag2401:CCGTACGCTA
Tag2402:CCGTACTCGT
Tag2403:CCGTAGAGGA
Tag2404:CCGTAGCATG
Tag2405:CCGTAGTACT
Tag2406:CCGTAGTTGG
Tag2407:CCGTATCACA
Tag2408:CCGTATTAAG
Tag2409:CCGTCACTGA
Tag2410:CCGTCAGATA
Tag2411:CCGTCATTAC
Tag2412:CCGTCCACAA
Tag2413:CCGTCGACTT
Tag2414:CCGTCGGTAA
Tag2415:CCGTCTAAGC
Tag2416:CCGTCTAGTG
Tag2417:CCGTCTCAAT
Tag2418:CCGTCTTCCA
Tag2419:CCGTCTTGGT
Tag2420:CCGTGAACTG
Tag2421:CCGTGAGCAA
Tag2422:CCGTGAGTTC
Tag2423:CATTCCGAGG
Tag2424:CATTCCGCAA
Tag2425:CATTCCGGCT
Tag2426:CATTCCTAAC
Tag2427:CATTCCTCCG
Tag2428:CATTCCTTGT
Tag2429:CATTCGAACG
Tag2430:CATTCGAGAA
Tag2431:CATTCGATTC
Tag2432:CATTCGCAGT
Tag2433:CATTCGGTAG
Tag2434:CATTCGTCGA
Tag2435:CATTCGTGCC
Tag2436:CATTCTACAG
Tag2437:CATTCTAGGT
Tag2438:CATTCTCATC
Tag2439:CATTCTCTGG
Tag2440:CATTGAACCT
Tag2441:CATTGAAGGA
Tag2442:CATTGACAAG
Tag2443:CATTGACGTC
Tag2444:CATTGAGAGC
Tag2445:CATTGAGCTA
Tag2446:CATTGATCGG
Tag2447:CATTGCAACA
Tag2448:CATTGCATTG
Tag2449:CATTGCCTGA
Tag2450:CATTGCTGTT
Tag2451:CATTGGCCAA
Tag2452:CATTGGCTCC
Tag2453:CATTGGTACT
Tag2454:CATTGTATGC
Tag2455:CATTGTCCGT
Tag2456:CATTGTGACG
Tag2457:CATTGTTCAC
Tag2458:CCAACACTAC
Tag2459:CCAACAGATT
Tag2460:CCAACATAGA
Tag2461:CCAACCACTT
Tag2462:CCAACCGTTC
Tag2463:CCAACCTTGT
Tag2464:CCAACGAGAA
Tag2465:CCAACGATCC
Tag2466:CCAACGCATG
Tag2467:CCAACGTTAG
Tag2468:CCAACTACCA
Tag2469:CCAACTCGCT
Tag2470:CCAACTCTTA
Tag2471:CCAACTGAGG
Tag2472:CCAACTGTAT
Tag2473:CCAACTTAAC
Tag2474:CCAAGAAGAT
Tag2475:CCAAGAATCG
Tag2476:CCAAGACACT
Tag2477:CCAAGATGTA
Tag2478:CCAAGCACAA
Tag2479:CCAAGCCATC
Tag2480:CCAAGCTACG
Tag2481:CCAAGGAGTC
Tag2482:CCAAGGCCTA
Tag2483:CCAAGGCTGT
Tag2484:CCAAGGTATT
Tag2485:CCAAGTCGTG
Tag2486:CCAAGTGTCC
Tag2487:CCAATAACTC
Tag2488:CCAATACAGG
Tag2489:CCAATACGCC
Tag2490:CCAATATCCG
Tag2491:CCAATATGGT
Tag2492:CCAATCAAGT
Tag2493:CCAATCAGCA
Tag2494:CCAATCATTG
Tag2495:CCAATCCTAA
Tag2496:CCAATGCGAG
Tag2497:CCAATGGACC
Tag2498:CCAATGGCAT
Tag2499:CCAATGTTGA
Tag2500:CCAATTAGGC
Tag2501:CCAATTCCAC
Tag2502:CCACAAGCAC
Tag2503:CCACAATACT
Tag2504:CCACAATTGC
Tag2505:CCACACCAGT
Tag2506:CCACACTATG
Tag2507:CCACACTCGA
Tag2508:CCACAGAACA
Tag2509:CCACAGCAAG
Tag2510:CCACAGCCTT
Tag2511:CCACAGTTAT
Tag2512:CCACATCATA
Tag2513:CCACATCTCC
Tag2514:CCACATGACG
Tag2515:CCACATGGTC
Tag2516:CCACCAAGAG
Tag2517:CCACCACCTA
Tag2518:CCACCAGTCA
Tag2519:CCACCATCGT
Tag2520:CCACCGAATT
Tag2521:CCACCTGCTT
Tag2522:CCACCTTCAA
Tag2523:CCACGAATGA
Tag2524:CCACGACTTC
Tag2525:CCACGAGGTT
Tag2526:CCACGATAAC
Tag2527:CCACGATCTG
Tag2528:CCACGCATAT
Tag2529:CCACGCGTTA
Tag2530:CCACGGTAGA
Tag2531:CCACGTACCT
Tag2532:CCACGTCGAA
Tag2533:CCACTACATT
Tag2534:CCACTCAACG
Tag2535:CCACTCGATC
Tag2536:CCACTCTAAT
Tag2537:CCACTGAGCT
Tag2538:CCACTGATAG
Tag2539:CCACTGTGAC
Tag2540:CCACTTAGTA
Tag2541:CCACTTGCCA
Tag2542:CCACTTGGAT
Tag2543:CCAGAACGTC
Tag2544:CCAGACAGTG
Tag2545:CCAGACCGAT
Tag2546:CCAGAGACAG
Tag2547:CCAGAGCTAA
Tag2548:CCAGAGGAAT
Tag2549:CCAGAGTCCA
Tag2550:CCAGATGTGC
Tag2551:CCAGATTGAA
Tag2552:CCAGCATACC
Tag2553:CCAGCCTAAG
Tag2554:CCAGCGTGTT
Tag2555:CCAGCTAACT
Tag2556:CCAGCTATAA
Tag2557:CCAGGAACCA
Tag2558:CCAGGAGAGA
Tag2559:CCAGGCGATT
Tag2560:CCAGGCTTGA
Tag2561:CCAGGTCTAT
Tag2562:CCAGGTGAAC
Tag2563:CCAGGTTAGG
Tag2564:CCAGTAAGTT
Tag2565:CCAGTACTGC
Tag2566:CCAGTAGCGT
Tag2567:CCAGTATTCT
Tag2568:CCAGTCACAC
Tag2569:CCAGTCGTCA
Tag2570:CCAGTGACGA
Tag2571:CCAGTGCACT
Tag2572:CCAGTGGATA
Tag2573:CCAGTTAATC
Tag2574:CCAGTTACCG
Tag2575:CCAGTTCAGA
Tag2576:CCAGTTCCTT
Tag2577:CCATAACCGT
Tag2578:CCATAAGAGG
Tag2579:CCATAAGCCA
Tag2580:CCATAATTCG
Tag2581:CCATACAACC
Tag2582:CCATACCGCA
Tag2583:CCATACGTAC
Tag2584:CCATACTCAG
Tag2585:CCATAGATCT
Tag2586:CCATAGGTGA
Tag2587:CCATAGTCGC
Tag2588:CCATATACGA
Tag2589:CCATATCCTC
Tag2590:CCATATCTGG
Tag2591:CCATATTGCC
Tag2592:CCATCAACAT
Tag2593:CCATCAAGGA
Tag2594:CCATCACGTG
Tag2595:CCATCAGCTC
Tag2596:CCATCCAATA
Tag2597:CCATCCAGAC
Tag2598:CCATCCATGG
Tag2599:CCATCCGAGT
Tag2600:CCATCGCACA
Tag2601:CCATCTGGAA
Tag2602:CCATCTGTCG
Tag2603:CCATGACATA
Tag2604:CCATGATTGT
Tag2605:CCATGCAGTT
Tag2606:CCATGCCTCT
Tag2607:CCATGCTCCA
Tag2608:CCATGGAAGC
Tag2609:CCATGGTGTG
Tag2610:CCATGGTTAC
Tag2611:CCATGTAACA
Tag2612:CCATGTAGAG
Tag2613:CCATGTCGGT
Tag2614:CCATGTTCAT
Tag2615:CCATTAGAAC
Tag2616:CCATTAGTTG
Tag2617:CCATTCACCT
Tag2618:CCATTCTGTA
Tag2619:CCATTGAATG
Tag2620:CCATTGCGGA
Tag2621:CCATTGTAGT
Tag2622:CCATTGTCAA
Tag2623:CGCTTAAGTA
Tag2624:CGCTTAATCC
Tag2625:CGCTTACAAT
Tag2626:CGCTTACCGA
Tag2627:CGCTTACTTG
Tag2628:CGCTTAGAGG
Tag2629:CGCTTAGGCT
Tag2630:CGCTTATACA
Tag2631:CGCTTCACAG
Tag2632:CGCTTCATGT
Tag2633:CGCTTCCGTT
Tag2634:CGCTTCCTAA
Tag2635:CGCTTCGAAC
Tag2636:CGCTTCTCCT
Tag2637:CGCTTGAATT
Tag2638:CGCTTGGCAA
Tag2639:CGCTTGGTTC
Tag2640:CGCTTGTAAG
Tag2641:CGCTTGTGGA
Tag2642:CGGAACAATC
Tag2643:CGGAACACAA
Tag2644:CGGAACCAGT
Tag2645:CGGAACCTAC
Tag2646:CGGAACGAAG
Tag2647:CGGAACGTCA
Tag2648:CGGAACTCCT
Tag2649:CGGAACTGGA
Tag2650:CGGAAGAACT
Tag2651:CGGAAGATGG
Tag2652:CGGAAGCCTT
Tag2653:CGGAAGTGAC
Tag2654:CGGAATAGTA
Tag2655:CGGAATCACC
Tag2656:CGGAATCCGA
Tag2657:CGGAATGCAT
Tag2658:CGGAATGTTG
Tag2659:CGGAATTAGG
Tag2660:CGGACAACAC
Tag2661:CGGACAATGT
Tag2662:CGGACACGTT
Tag2663:CGGACAGCTA
Tag2664:CGGACATAGC
Tag2665:CGGACGATTC
Tag2666:CGGACGGAAT
Tag2667:CGGACGTTAA
Tag2668:CGGACTACTG
Tag2669:CGGACTAGAT
Tag2670:CGGACTGTCT
Tag2671:CGGACTTATT
Tag2672:CGGACTTGCA
Tag2673:CGGAGAATTG
Tag2674:CGGAGACAGA
Tag2675:CGGAGACTAT
Tag2676:CGGAGATACG
Tag2677:CGGAGCATCT
Tag2678:CGGAGCGATA
Tag2679:CGGAGGTATC
Tag2680:CGGAGTCATG
Tag2681:CGGAGTGGTT
Tag2682:CGGAGTTCAC
Tag2683:CGGATAACGG
Tag2684:CGGATACACT
Tag2685:CGGATAGGTG
Tag2686:CGGATATCAA
Tag2687:CGGATCAGAC
Tag2688:CGGATCATTA
Tag2689:CGGATCGTGT
Tag2690:CGGATCTACA
Tag2691:CGGATGAGCA
Tag2692:CGGATGCAAG
Tag2693:CGGATGCTGA
Tag2694:CGGATTAAGT
Tag2695:CGGATTCTCG
Tag2696:CGGATTGATC
Tag2697:CGGATTGGAA
Tag2698:CGGCAACATT
Tag2699:CGGCAACTAA
Tag2700:CGGCAAGACA
Tag2701:CGGCAATCAG
Tag2702:CGGCACATGA
Tag2703:CGGCAGTAGA
Tag2704:CGGCATACGT
Tag2705:CGGCATATAC
Tag2706:CGGCATTGTT
Tag2707:CGGCCATATG
Tag2708:CGGCCATTCT
Tag2709:CGGCCGAATA
Tag2710:CGGCCTGTTA
Tag2711:CGGCGAAGAT
Tag2712:CGGCGCTAAT
Tag2713:CGGCGGATAA
Tag2714:CGGCGTGTAT
Tag2715:CGGCGTTCTA
Tag2716:CGGCTAACCA
Tag2717:CGGCTACTTC
Tag2718:CGGCTATTGG
Tag2719:CGGCTCACAT
Tag2720:CGGCTCTGAA
Tag2721:CGGCTGGATT
Tag2722:CGGCTGTAAC
Tag2723:CGGCTTAGTG
Tag2724:CGGCTTCAGA
Tag2725:CGGTAACACG
Tag2726:CGGTAAGCGT
Tag2727:CGGTAAGTAG
Tag2728:CGGTAATATC
Tag2729:CGGTAATGAA
Tag2730:CGGTACATCC
Tag2731:CGGTACCATA
Tag2732:CGGTACTGTG
Tag2733:CGGTAGAGTT
Tag2734:CGGTAGTCCA
Tag2735:CGGTAGTTAT
Tag2736:CGGTATAGGC
Tag2737:CGGTATCCTG
Tag2738:CGGTATGACT
Tag2739:CGGTCATAAT
Tag2740:CGGTCCAACA
Tag2741:CGGTCCGTAT
Tag2742:CGGTCCTCTA
Tag2743:CGGTCGATCT
Tag2744:CGGTCTCTGT
Tag2745:CGGTCTTACG
Tag2746:CGGTGAAGTC
Tag2747:CGGTGAGTGA
Tag2748:CGGTGCACTT
Tag2749:CGGTGCTTAA
Tag2750:CGGTGGAAGA
Tag2751:CGGTGTACAA
Tag2752:CGGTGTATCG
Tag2753:CGGTGTCGAT
Tag2754:CGGTGTTCCT
Tag2755:CGGTGTTGGA
Tag2756:CGGTTACGAC
Tag2757:CGGTTACTCA
Tag2758:CGGTTATGGT
Tag2759:CGGTTCAAGC
Tag2760:CGGTTCTATT
Tag2761:CGGTTGAACG
Tag2762:CGGTTGCAGT
Tag2763:CGGTTGCCTA
Tag2764:CGGTTGTTGC
Tag2765:CGTAACACTT
Tag2766:CGTAACATAG
Tag2767:CGTAACCGCA
Tag2768:CGTAACGGAC
Tag2769:CGTAACTACC
Tag2770:CGTAACTTGT
Tag2771:CGTAAGAATG
Tag2772:CGTAAGAGAA
Tag2773:CGTAAGCAGC
Tag2774:CGTAAGCTCG
Tag2775:CGTAAGGCCA
Tag2776:CGTAAGGTAT
Tag2777:CGTAAGTGCT
Tag2778:CGTAATAGCG
Tag2779:CGTAATCCTC
Tag2780:CGTAATGAGT
Tag2781:CGTAATGTCC
Tag2782:CGTAATTCAG
Tag2783:CGTACAACGA
Tag2784:CGTACAAGCC
Tag2785:CGTACACAAC
Tag2786:CGTACACTGG
Tag2787:CGTACAGACT
Tag2788:CGTACAGGAG
Tag2789:CGTACATCAT
Tag2790:CGTACCAAGT
Tag2791:CGTACCGATC
Tag2792:CGTACCTCCA
Tag2793:CGTACCTGTT
Tag2794:CGTACGCATT
Tag2795:CGTACGGTTA
Tag2796:CGTACGTAAG
Tag2797:CGTACTATAC
Tag2798:CGTACTCGAA
Tag2799:CGTACTTAGA
Tag2800:CGTAGAACAG
Tag2801:CGTAGAAGGT
Tag2802:CGTAGACGTG
Tag2803:CGTAGAGTCA
Tag2804:CGTAGATCGC
Tag2805:CGTAGCCTTA
Tag2806:CGTAGCTGAG
Tag2807:CGTAGGACCT
Tag2808:CGTAGGCGAT
Tag2809:CGTAGGTCTG
Tag2810:CGTAGGTGGA
Tag2811:CGTAGTAATC
Tag2812:CGTAGTATGA
Tag2813:CGTATACCGT
Tag2814:CGTATAGTTC
Tag2815:CGTATCAGTG
Tag2816:CGTATCCACG
Tag2817:CGTATCGCCT
Tag2818:CGTATGAACC
Tag2819:CGTATGCTAC
Tag2820:CGTATTACCA
Tag2821:CGTATTCGTT
Tag2822:CGTATTGCTG
Tag2823:CGTCAACAGG
Tag2824:CGTCAACCTA
Tag2825:CGTCAAGATC
Tag2826:CGTCAATTGA
Tag2827:CGTCACCTTC
Tag2828:CGTCACGCAA
Tag2829:CGTCACGTCT
Tag2830:CGTCACTATT
Tag2831:CGTCAGCTGT
Tag2832:CGTCAGTACG
Tag2833:CGTCATAGGA
Tag2834:CGTCATCTAG
Tag2835:CGTCATGGTG
Tag2836:CGTCATTGCC
Tag2837:CGTCCAACTC
Tag2838:CGTCCAATAG
Tag2839:CGTCCACGAT
Tag2840:CGTCCAGAGA
Tag2841:CGTCCATGCA
Tag2842:CGTCCGAGTT
Tag2843:CGTCCTAACG
Tag2844:CGTCCTCAGT
Tag2845:CGTCCTTATC
Tag2846:CGTCCTTCCT
Tag2847:CGTCGAATCC
Tag2848:CGTCGACACA
Tag2849:CGTCGAGCAT
Tag2850:CGTCGATAGT
Tag2851:CGTCGATGAC
Tag2852:CGTCGCCTAT
Tag2853:CGTCGCTTCA
Tag2854:CGTCGGACTA
Tag2855:CGTCGTATTG
Tag2856:CGTCGTCAAC
Tag2857:CGTCTACTCG
Tag2858:CGTCTAGGTT
Tag2859:CGTCTAGTAA
Tag2860:CGTCTCAAGG
Tag2861:CGACGGTCTT
Tag2862:CGACGTAATT
Tag2863:CGACGTACAC
Tag2864:CGACGTCTCA
Tag2865:CGACGTTGCT
Tag2866:CGACTAACGT
Tag2867:CGACTAAGAA
Tag2868:CGACTACAAG
Tag2869:CGACTAGTCC
Tag2870:CGACTCACTA
Tag2871:CGACTCGAGT
Tag2872:CGACTCGTTG
Tag2873:CGACTCTTAC
Tag2874:CGACTGGACA
Tag2875:CGACTGTCGA
Tag2876:CGACTTATGC
Tag2877:CGACTTCACC
Tag2878:CGACTTCCTG
Tag2879:CGACTTCTAT
Tag2880:CGAGAAGATA
Tag2881:CGAGAATCGT
Tag2882:CGAGAATTCA
Tag2883:CGAGACAACT
Tag2884:CGAGACATGG
Tag2885:CGAGACGCAT
Tag2886:CGAGAGAGAC
Tag2887:CGAGAGCTTC
Tag2888:CGAGAGTAAG
Tag2889:CGAGATAGTT
Tag2890:CGAGATATCC
Tag2891:CGAGATCCAC
Tag2892:CGAGATTAGA
Tag2893:CGAGATTGCG
Tag2894:CGAGCAAGTG
Tag2895:CGAGCACACA
Tag2896:CGAGCACTGT
Tag2897:CGAGCATGAA
Tag2898:CGAGCCAGAT
Tag2899:CGAGCCTATC
Tag2900:CGAGCGTAGT
Tag2901:CGAGCTACGA
Tag2902:CGAGCTCATT
Tag2903:CGAGCTGTTC
Tag2904:CGAGGAACAT
Tag2905:CGAGGAAGGA
Tag2906:CGAGGACGTT
Tag2907:CGAGGACTAC
Tag2908:CGAGGCAATA
Tag2909:CGAGGCTTAG
Tag2910:CGAGGTGATG
Tag2911:CGAGGTGTAA
Tag2912:CGAGGTTGTC
Tag2913:CGAGTAGACG
Tag2914:CGAGTATAAC
Tag2915:CGAGTCAGTC
Tag2916:CGAGTCCTGA
Tag2917:CGAGTGAGGT
Tag2918:CGAGTGATTA
Tag2919:CGAGTGCCAA
Tag2920:CGAGTTAAGG
Tag2921:CGAGTTCGCA
Tag2922:CGAGTTGAAT
Tag2923:CGATAACCAA
Tag2924:CGATAACGCC
Tag2925:CGATACAGTA
Tag2926:CGATACCTAG
Tag2927:CGATACGATG
Tag2928:CGATACTGGC
Tag2929:CGATAGCAGG
Tag2930:CGATAGGCTC
Tag2931:CGATATCTCT
Tag2932:CGATATGCCG
Tag2933:CGATATGGAT
Tag2934:CGATCAAGCT
Tag2935:CGATCAATTC
Tag2936:CGATCAGAAG
Tag2937:CGATCATCGA
Tag2938:CGATCCGCTT
Tag2939:CGATCCGTCA
Tag2940:CGATCGCGAA
Tag2941:CGATCGGTAC
Tag2942:CGATCTAACC
Tag2943:CGATCTATAG
Tag2944:CGATCTCCAT
Tag2945:CGATCTGAGA
Tag2946:CGATCTTCTC
Tag2947:CGATGACCTC
Tag2948:CGATGAGACT
Tag2949:CGATGAGGAA
Tag2950:CGATGATAGC
Tag2951:CGATGGATAT
Tag2952:CGATGGTCAG
Tag2953:CGATGTCTTG
Tag2954:CGATGTGTGC
Tag2955:CGATTAACTG
Tag2956:CGATTGAGCC
Tag2957:CGATTGGTGG
Tag2958:CGATTGTTCT
Tag2959:CGCAACAACG
Tag2960:CGCAACATGC
Tag2961:CGCAACCTCT
Tag2962:CGCAAGACGT
Tag2963:CGCAAGCATA
Tag2964:CGCAAGTAAT
Tag2965:CGCAATAAGA
Tag2966:CGCAATCGGT
Tag2967:CGCAATGAAC
Tag2968:CGCAATTCTA
Tag2969:CGCACAATCA
Tag2970:CGCACAGATG
Tag2971:CGCACATTAC
Tag2972:CGCACCACAT
Tag2973:CGCACTATGG
Tag2974:CGCACTGGTA
Tag2975:CGCACTTCGT
Tag2976:CGCAGAACTT
Tag2977:CGCAGACCAA
Tag2978:CGCAGATATA
Tag2979:CGCAGATGCT
Tag2980:CGCAGCGAAT
Tag2981:CGCAGGAGTA
Tag2982:CGCAGTCTAC
Tag2983:CGCATAATAG
Tag2984:CGCATAGCAC
Tag2985:CGCATCCATC
Tag2986:CGCATCGCTA
Tag2987:CGCATCTTGA
Tag2988:CGCATGAAGG
Tag2989:CGCATGGTCT
Tag2990:CGCATTACGC
Tag2991:CGCATTCGAG
Tag2992:CGCCAAGGTA
Tag2993:CGCCAATTAT
Tag2994:CGCCACAGAA
Tag2995:CGCCACTAAC
Tag2996:CGCCAGAATC
Tag2997:CGCCATACCA
Tag2998:CGCCATCAAT
Tag2999:CGCCATGTAA
Tag3000:CGCCGAATGT
Tag3001:CGCCGACTTA
Tag3002:CGCCGATAAG
Tag3003:CGCCGTTAGA
Tag3004:CGCCGTTCAT
Tag3005:CGCCTATATT
Tag3006:CGCCTCAACA
Tag3007:CGCCTCGTAT
Tag3008:CGCCTGATAC
Tag3009:CGCCTGTTGT
Tag3010:CGCCTTGCTT
Tag3011:CGCGAATATG
Tag3012:CGCGACCATT
Tag3013:CGCGAGGTTA
Tag3014:CGCGCTATTA
Tag3015:CGCGCTTAAG
Tag3016:CGCGGAGATT
Tag3017:CGCGGATTGA
Tag3018:CGCGGTATCT
Tag3019:CGCGGTCATA
Tag3020:CGCGTAGTGT
Tag3021:CGCGTATCAG
Tag3022:CGCGTCTGTA
Tag3023:CGCGTGTTCA
Tag3024:CGCTAATCTT
Tag3025:CGCTAATTGC
Tag3026:CGCTACACTC
Tag3027:CGCTACGAGA
Tag3028:CGCTACTGCA
Tag3029:CGCTAGCCAT
Tag3030:CGCTAGTTCG
Tag3031:CGCTCAGTTA
Tag3032:CGCTCCATTG
Tag3033:CGCTCGTGTT
Tag3034:CGCTCTTATA
Tag3035:CGCTGAATAA
Tag3036:CGCTGCAACT
Tag3037:CGCTGCTATC
Tag3038:CGCTGTACGT
Tag3039:CGCTGTAGCA
Tag3040:CGCTGTTGAC
Tag3041:CAATAGCGTA
Tag3042:CAATAGTACG
Tag3043:CAATATGTCC
Tag3044:CAATCATGGC
Tag3045:CAATCCAGTG
Tag3046:CAATCGTCAC
Tag3047:CAATCTCGCG
Tag3048:CAATGACGAT
Tag3049:CAATGAGTCA
Tag3050:CAATGCGTGT
Tag3051:CAATGCTAAG
Tag3052:CAATGCTGCC
Tag3053:CAATGGTATC
Tag3054:CAATGTGCAG
Tag3055:CAATTATGCG
Tag3056:CAATTCACGC
Tag3057:CAATTCCTCA
Tag3058:CAATTGCCGG
Tag3059:CAATTGCTAC
Tag3060:CACAACAGTC
Tag3061:CACAACGCGA
Tag3062:CACAACTCTG
Tag3063:CACAAGAGCT
Tag3064:CACAAGCTAT
Tag3065:CACAAGGTCG
Tag3066:CACAAGTCAA
Tag3067:CACAATGCCT
Tag3068:CACAATTACG
Tag3069:CACACACAGA
Tag3070:CACACCATAG
Tag3071:CACACCGTCT
Tag3072:CACACTAAGT
Tag3073:CACACTCCTA
Tag3074:CACACTGTTG
Tag3075:CACACTTATC
Tag3076:CACACTTGAA
Tag3077:CACAGACGTA
Tag3078:CACAGATTCC
Tag3079:CACAGCATGA
Tag3080:CACAGCCAAC
Tag3081:CACAGGACTC
Tag3082:CACAGTAATG
Tag3083:CACAGTAGGC
Tag3084:CACAGTCGAT
Tag3085:CACAGTCTCG
Tag3086:CACATACACG
Tag3087:CACATATGCA
Tag3088:CACATCAAGC
Tag3089:CACATCACCA
Tag3090:CACATCCTGT
Tag3091:CACATCGGAC
Tag3092:CACATCTACT
Tag3093:CACATGCCAG
Tag3094:CACATGCTTC
Tag3095:CACATGGAAT
Tag3096:CACATTGAGG
Tag3097:CACATTGGTT
Tag3098:CACCAAGAAC
Tag3099:CACCAATAGT
Tag3100:CACCACACCT
Tag3101:CACCACTTAG
Tag3102:CACCAGATGC
Tag3103:CACCAGCACA
Tag3104:CACCATTCGC
Tag3105:CACCATTGTA
Tag3106:CACCGAATCA
Tag3107:CACCGAGAGA
Tag3108:CACCGCTTGT
Tag3109:CACCGGTCTA
Tag3110:CACCGGTGAT
Tag3111:CACCGTACTT
Tag3112:CACCGTGAAG
Tag3113:CACCTAACTA
Tag3114:CACCTATCAC
Tag3115:CACCTCCGAT
Tag3116:CACCTCCTTG
Tag3117:CACCTCTAGA
Tag3118:CACCTGAGGT
Tag3119:CACCTGTACC
Tag3120:CACCTTATAG
Tag3121:CACCTTCATT
Tag3122:CACCTTGTCT
Tag3123:CACGAACACT
Tag3124:CACGACTAGC
Tag3125:CACGACTGAT
Tag3126:CACGAGAAGT
Tag3127:CACGAGCTTG
Tag3128:CACGAGTGTC
Tag3129:CACGATCCAT
Tag3130:CACGATGTGA
Tag3131:CACGCAGTAA
Tag3132:CACGCGAGTT
Tag3133:CACGCGTTCT
Tag3134:CACGCTTCGA
Tag3135:CACGGAATTG
Tag3136:CACGGATATC
Tag3137:CACGGATGAA
Tag3138:CACGGTTGGT
Tag3139:CACGTAAGAG
Tag3140:CACGTACATA
Tag3141:CACGTAGCGA
Tag3142:CACGTCACGT
Tag3143:CACGTCTTAA
Tag3144:CACGTGATGG
Tag3145:CACGTGCCTT
Tag3146:CACGTGGATC
Tag3147:CACGTTACTC
Tag3148:CACGTTCAAC
Tag3149:CACGTTCGTG
Tag3150:CACGTTGCAG
Tag3151:CACTAACTGG
Tag3152:CACTAATCAG
Tag3153:CACTACCGAA
Tag3154:CACTACGCAC
Tag3155:CACTAGAACC
Tag3156:CACTAGACTT
Tag3157:CACTAGGATG
Tag3158:CACTAGTTAC
Tag3159:CACTATCGTC
Tag3160:CACTATGAGT
Tag3161:CACTATTCCA
Tag3162:CACTCAACAA
Tag3163:CACTCAATCT
Tag3164:CACTCACCTC
Tag3165:CACTCAGGCA
Tag3166:CACTCATATG
Tag3167:CACTCCATGC
Tag3168:CACTCCTACA
Tag3169:CACTCGCATA
Tag3170:CACTCGTAGC
Tag3171:CACTCTCGGA
Tag3172:CACTCTGAAC
Tag3173:CACTGAAGTT
Tag3174:CACTGACACA
Tag3175:CACTGCAGAG
Tag3176:CACTGGAAGG
Tag3177:CACTGGCTAG
Tag3178:CACTGTGATA
Tag3179:CACTTACGGC
Tag3180:CACTTCGCTT
Tag3181:CACTTGACCG
Tag3182:CAGAACGACC
Tag3183:CAGAACGTGG
Tag3184:CAGAACTGTT
Tag3185:CAGAAGCATC
Tag3186:CAGAAGGCTA
Tag3187:CAGAAGTACA
Tag3188:CAGAAGTTAG
Tag3189:CAGAATATGC
Tag3190:CAGAATGGAC
Tag3191:CAGACATCTG
Tag3192:CAGACCGTAC
Tag3193:CAGACGATGA
Tag3194:CAGACTGCAG
Tag3195:CAGAGAGATT
Tag3196:CAGAGCAACG
Tag3197:CAGAGCCTAG
Tag3198:CAGAGGAGAA
Tag3199:CAGAGGCACT
Tag3200:CAGAGTCGGA
Tag3201:CAGAGTTGCC
Tag3202:CAGATACTAC
Tag3203:CAGATCACAG
Tag3204:CAGATCTAGG
Tag3205:CAGATCTCTA
Tag3206:CAGATTACCT
Tag3207:CAGATTAGTC
Tag3208:CAGCACAGAC
Tag3209:CAGCACTACG
Tag3210:CAGCAGGTCA
Tag3211:CAGCATAACA
Tag3212:CAGCATGAGC
Tag3213:CAGCATTCAA
Tag3214:CCGTGATGCT
Tag3215:CCGTGTTCTC
Tag3216:CCGTTACGTT
Tag3217:CCGTTATCGG
Tag3218:CCGTTCCGAA
Tag3219:CCGTTCTACC
Tag3220:CCGTTGATAC
Tag3221:CCGTTGTGAG
Tag3222:CCTAACAGGA
Tag3223:CCTAACATTC
Tag3224:CCTAACCAAG
Tag3225:CCTAACGACT
Tag3226:CCTAACGTAA
Tag3227:CCTAACTCAT
Tag3228:CCTAAGAGTT
Tag3229:CCTAAGCTGA
Tag3230:CCTAAGGAAC
Tag3231:CCTAAGTCCG
Tag3232:CCTAATACGT
Tag3233:CCTAATGTGG
Tag3234:CCTACACCTG
Tag3235:CCTACACGGT
Tag3236:CCTACCACAC
Tag3237:CCTACCAGCT
Tag3238:CCTACCTTCG
Tag3239:CCTACGATGG
Tag3240:CCTACGGACA
Tag3241:CCTACGGCTT
Tag3242:CCTACGTGAT
Tag3243:CCTACTAGAG
Tag3244:CCTACTCTGC
Tag3245:CCTACTTCTA
Tag3246:CCTAGAAGCA
Tag3247:CCTAGACTCC
Tag3248:CCTAGAGATA
Tag3249:CCTAGAGCCT
Tag3250:CCTAGCAATT
Tag3251:CCTAGCCAGA
Tag3252:CCTAGCGTTG
Tag3253:CCTAGGTACC
Tag3254:CCTAGGTCAA
Tag3255:CCTAGTAAGG
Tag3256:CCTAGTGGAC
Tag3257:CCTAGTTGTT
Tag3258:CCTATAATGC
Tag3259:CCTATAGCAA
Tag3260:CCTATCTATC
Tag3261:CCTATCTCGA
Tag3262:CCTATGACAG
Tag3263:CCTATGCGCT
Tag3264:CCTATGGAGG
Tag3265:CCTATGTGTA
Tag3266:CCTATTCAGT
Tag3267:CCTATTGGCA
Tag3268:CCTCAATGAG
Tag3269:CCTCACAAGC
Tag3270:CCTCACAGAT
Tag3271:CCTCACTGTC
Tag3272:CCTCAGACAC
Tag3273:CCTCAGCGAA
Tag3274:CCTCATAACT
Tag3275:CCTCATCCAT
Tag3276:CCTCATTCGG
Tag3277:CCTCCAACCA
Tag3278:CCTCCAGAAG
Tag3279:CCTCCAGGTA
Tag3280:CCTCCATTAT
Tag3281:CCTCCGATCT
Tag3282:CCTCCGTATG
Tag3283:CCTCCTCTTG
Tag3284:CCTCCTGTGA
Tag3285:CCTCGAAGTC
Tag3286:CCTCGACATG
Tag3287:CCTCGCTACT
Tag3288:CCTCGGCAAT
Tag3289:CCTCGGTTGT
Tag3290:CCTCGTAATA
Tag3291:CCTCGTGTAG
Tag3292:CCTCGTTGGA
Tag3293:CCTCTAATTG
Tag3294:CCTCTACGCA
Tag3295:CCTCTATAGA
Tag3296:CCTCTATCTC
Tag3297:CCTCTCACGT
Tag3298:CCTCTCATAC
Tag3299:CCTCTGCTTA
Tag3300:CCTCTGTCAT
Tag3301:CCTCTGTTCC
Tag3302:CCTCTTAGCG
Tag3303:CCTCTTCAAG
Tag3304:CCTCTTGACC
Tag3305:CCTGAACACC
Tag3306:CCTGAATCGC
Tag3307:CCTGACATCT
Tag3308:CCTGACCTTA
Tag3309:CCTGACTAGT
Tag3310:CCTGAGGAGA
Tag3311:CCTGATAGCC
Tag3312:CCTGATATTG
Tag3313:CCTGATCGAG
Tag3314:CCTGATTACG
Tag3315:CCTGCAAGAC
Tag3316:CCTGCAGCAT
Tag3317:CCTGCATGTG
Tag3318:CCTGCCATAG
Tag3319:CCTGCCTCAA
Tag3320:CCTGCGACTA
Tag3321:CCTGCTAGGA
Tag3322:CCTGCTCGTT
Tag3323:CCTGCTTAAT
Tag3324:CCTGGAACGT
Tag3325:CCTGGAATTA
Tag3326:CCTGGAGTAC
Tag3327:CCTGGATGAT
Tag3328:CCTGGATTGG
Tag3329:CCTGGCTATA
Tag3330:CCTGGTACAG
Tag3331:CCTGGTGCTT
Tag3332:CCTGTACTAA
Tag3333:CCTGTAGATC
Tag3334:CCTGTCACCA
Tag3335:CCTGTCCATT
Tag3336:CCTGTGGTGT
Tag3337:CCTGTGTAAC
Tag3338:CCTGTGTCTG
Tag3339:CCTTAAGCAG
Tag3340:CCTTAAGTGT
Tag3341:CCTTACCTAT
Tag3342:CCTTACTGCG
Tag3343:CCTTAGACCA
Tag3344:CCTTAGCGTC
Tag3345:CCTTAGGACG
Tag3346:CCTTAGTCTT
Tag3347:CCTTATCAGC
Tag3348:CCTTATGGTT
Tag3349:CCTTATGTCA
Tag3350:CCTTCAACGC
Tag3351:CCTTCATAGG
Tag3352:CCTTCATGAA
Tag3353:CCTTCCATCA
Tag3354:CCTTCGTTGC
Tag3355:CCTTCTCCAA
Tag3356:CCTTCTGACT
Tag3357:CCTTGCCGTA
Tag3358:CCTTGGACAT
Tag3359:CCTTGGTGCA
Tag3360:CCTTGTATCT
Tag3361:CCTTGTCTAC
Tag3362:CGAACAGCGT
Tag3363:CGAACATTCG
Tag3364:CGAACGCAGA
Tag3365:CGAACGTGTA
Tag3366:CGAACTTGAG
Tag3367:CGAAGCCAAG
Tag3368:CGAAGCGTAC
Tag3369:CGAAGTACCG
Tag3370:CGAATAGCCA
Tag3371:CGAATCGGAG
Tag3372:CGAATGATCG
Tag3373:CGAATGGTAA
Tag3374:CGACATGTGT
Tag3375:CGACCTTAAT
Tag3376:CAGCCACATA
Tag3377:CAGCCATGGA
Tag3378:CAGCCTAGTT
Tag3379:CAGCCTTGAG
Tag3380:CAGCGAATGC
Tag3381:CAGCGATCTC
Tag3382:CAGCGCCTTA
Tag3383:CAGCGGACAT
Tag3384:CAGCGGTAAG
Tag3385:CAGCTACAGT
Tag3386:CAGCTAGAAG
Tag3387:CAGCTATCCT
Tag3388:CAGCTATGTG
Tag3389:CAGCTCCTCT
Tag3390:CAGCTCGGTA
Tag3391:CAGCTGCGTT
Tag3392:CAGGAATAAG
Tag3393:CAGGACCAAT
Tag3394:CAGGAGCTGT
Tag3395:CAGGATGACG
Tag3396:CAGGCAGATC
Tag3397:CAGGCCATGT
Tag3398:CAGGCGTCAA
Tag3399:CAGGCTACTA
Tag3400:CAGGTAGCAT
Tag3401:CAGGTAGTCG
Tag3402:CAGGTATTGA
Tag3403:CAGGTCAGTT
Tag3404:CAGGTCGACA
Tag3405:CAGGTCTTCC
Tag3406:CAGGTGCTCA
Tag3407:CAGGTGTAGC
Tag3408:CAGGTTCACT
Tag3409:CAGGTTCCGA
Tag3410:CAGTAACTCT
Tag3411:CAGTACAGCA
Tag3412:CAGTACCGGT
Tag3413:CAGTAGACAC
Tag3414:CAGTAGATTG
Tag3415:CAGTATCGAG
Tag3416:CAGTCAAGCG
Tag3417:CAGTCACTTG
Tag3418:CAGTCAGCCT
Tag3419:CAGTCCGTTA
Tag3420:CAGTCGGATT
Tag3421:CAGTCTATCA
Tag3422:CAGTCTGGTC
Tag3423:CAGTCTTCGG
Tag3424:CAGTGACTAA
Tag3425:CAGTGCAAGT
Tag3426:CAGTGCGCAT
Tag3427:CAGTGCTTCT
Tag3428:CAGTGGACCA
Tag3429:CAGTGGTCGT
Tag3430:CAGTGTCACC
Tag3431:CAGTGTGGCA
Tag3432:CAGTTAACGA
Tag3433:CAGTTCATGG
Tag3434:CAGTTCCAAG
Tag3435:CAGTTCTGAC
Tag3436:CAGTTGGAGG
Tag3437:CAGTTGTGCT
Tag3438:CATAACTCGC
Tag3439:CATAAGCGAC
Tag3440:CATAAGTGTG
Tag3441:CATAATCCGG
Tag3442:CATACAGTCC
Tag3443:CATACATGAC
Tag3444:CATACCGCTG
Tag3445:CATACTCCAC
Tag3446:CATACTGCGT
Tag3447:CATAGAGTAG
Tag3448:CATAGATGCG
Tag3449:CATAGCGGTC
Tag3450:CATAGGTTCA
Tag3451:CATAGTCACA
Tag3452:CATAGTGTCT
Tag3453:CATATCATCG
Tag3454:CATATGGTGC
Tag3455:CATATGTGGT
Tag3456:CATATTCTCC
Tag3457:CATATTGGAG
Tag3458:CATCACCTAA
Tag3459:CATCACGAGA
Tag3460:CATCAGGCGT
Tag3461:CATCAGTCAG
Tag3462:CATCATAAGG
Tag3463:CATCCACTGT
Tag3464:CATCCAGATT
Tag3465:CATCCATCTA
Tag3466:CATCCGCTAC
Tag3467:CATCCTGTAT
Tag3468:CATCGACCGA
Tag3469:CATCGGAAGA
Tag3470:CATCGTAGAT
Tag3471:CATCGTCCTG
Tag3472:CATCGTGCAA
Tag3473:CATCTACCTT
Tag3474:CATCTAGACA
Tag3475:CATCTATGCC
Tag3476:CATCTCAGCT
Tag3477:CATCTCATGA
Tag3478:CATCTGTCCA
Tag3479:CATCTTCGAC
Tag3480:CATCTTGTTC
Tag3481:CATGAACAGA
Tag3482:CATGAAGCTG
Tag3483:CATGAATCCA
Tag3484:CATGACCGTT
Tag3485:CATGACTTAC
Tag3486:CATGAGCGCA
Tag3487:CATGATGAAC
Tag3488:CATGATGGTA
Tag3489:CATGCACGCT
Tag3490:CATGCAGTGG
Tag3491:CATGCCAACC
Tag3492:CATGCCTATG
Tag3493:CATGCGCAAG
Tag3494:CATGCGTCTT
Tag3495:CATGCTCTAA
Tag3496:CATGCTTGGC
Tag3497:CATGGCACGA
Tag3498:CATGGCCTTC
Tag3499:CATGGCGAAT
Tag3500:CATGGTTAAG
Tag3501:CATGTAAGGT
Tag3502:CATGTACCAC
Tag3503:CATGTCTCCT
Tag3504:CATGTGAGTG
Tag3505:CATGTGTGAA
Tag3506:CATGTTCTGT
Tag3507:CATGTTGTCA
Tag3508:CATTAAGGCC
Tag3509:CATTACACGG
Tag3510:CATTATCGCT
Tag3511:CGTCTGTTAG
Tag3512:CGTCTTGCGA
Tag3513:CGTGACTCTA
Tag3514:CGTGATAACA
Tag3515:CGTGATTGGT
Tag3516:CGTGCAATGC
Tag3517:CGTGCACGTA
Tag3518:CGTGCGATCA
Tag3519:CGTGCGTTAC
Tag3520:CGTGCTGTGT
Tag3521:CGTGGAGTTG
Tag3522:CGTGGATCTT
Tag3523:CGTGGCAGAA
Tag3524:CGTGGCATGT
Tag3525:CGTGGTCACT
Tag3526:CGTGGTTCCA
Tag3527:CGTGTACAGC
Tag3528:CGTGTATGTC
Tag3529:CGTGTCCTAG
Tag3530:CGTGTCTCAC
Tag3531:CGTGTGACAT
Tag3532:CGTGTGGATG
Tag3533:CGTGTTAGAG
Tag3534:CGTGTTCTTA
Tag3535:CGTTACGTGG
Tag3536:CGTTACTGAT
Tag3537:CGTTAGCACT
Tag3538:CGTTAGTGTA
Tag3539:CGTTATGAAG
Tag3540:CGTTATGCGC
Tag3541:CGTTCACTCC
Tag3542:CGTTCAGGTC
Tag3543:CGTTCCTACT
Tag3544:CGTTCGACTG
Tag3545:CGTTCTCGTG
Tag3546:CGTTCTGCCA
Tag3547:CGTTGAATGG
Tag3548:CGTTGACGCT
Tag3549:CGTTGCACAC
Tag3550:CGTTGCCATG
Tag3551:CGTTGCTAGA
Tag3552:CGTTGGTAAC
Tag3553:CGTTGTAGTT
Tag3554:CTAACAACGC
Tag3555:CTAACAGCCG
Tag3556:CTAACATGCA
Tag3557:CTAACCAATC
Tag3558:CTAACCGAGA
Tag3559:CTAACCTCAA
Tag3560:CTAACGAGGT
Tag3561:CTAACGATTG
Tag3562:CTAACGCCAT
Tag3563:CTAACGCTGC
Tag3564:CTAACTACAG
Tag3565:CTAACTCCGA
Tag3566:CTAACTGGTT
Tag3567:CTAAGACCAC
Tag3568:CTAAGACTGG
Tag3569:CTAAGAGCTA
Tag3570:CTAAGATCCT
Tag3571:CTAAGCGTCA
Tag3572:CTAAGCTAAC
Tag3573:CTAAGGAAGG
Tag3574:CTAAGGCGAA
Tag3575:CTAAGGTCGC
Tag3576:CTAAGTAGCC
Tag3577:CTAAGTCTTC
Tag3578:CTAAGTGACG
Tag3579:CTAAGTTCTG
Tag3580:CTAAGTTGGT
Tag3581:CTAATAGGCT
Tag3582:CTAATCCACA
Tag3583:CTAATCCGTT
Tag3584:CTAATCTGGA
Tag3585:CTAATGAGAC
Tag3586:CTAATGCCTG
Tag3587:CTAATTGCGC
Tag3588:CTACAACACA
Tag3589:CTACAACCGG
Tag3590:CTACAAGGAT
Tag3591:CTACAAGTTC
Tag3592:CTACACCGTA
Tag3593:CTACACGTCG
Tag3594:CTACACTCAC
Tag3595:CTACACTGCT
Tag3596:CTACAGATAC
Tag3597:CTACATAGTG
Tag3598:CTACATTACC
Tag3599:CTACATTCGT
Tag3600:CTACCAACTG
Tag3601:CTACCACGAA
Tag3602:CTACCAGAGG
Tag3603:CTACCGCGTT
Tag3604:CTACCGGAAT
Tag3605:CTACCGTCCT
Tag3606:CTACCGTTGA
Tag3607:CTACCTATCT
Tag3608:CTACCTGACA
Tag3609:CTACCTGGAG
Tag3610:CTACGACAAT
Tag3611:CTACGATGCC
Tag3612:CTACGCAGAC
Tag3613:CTACGCCTGA
Tag3614:CTACGCGAAG
Tag3615:CTACGGAGGA
Tag3616:CTACGGTATG
Tag3617:CTACGTACGG
Tag3618:CTACGTCTAG
Tag3619:CTACGTGGTA
Tag3620:CTACGTTCCA
Tag3621:CTACTAAGGC
Tag3622:CTACTCAAGA
Tag3623:CTACTCTCCG
Tag3624:CTACTGATGT
Tag3625:CTACTGCACG
Tag3626:CTACTGCTAA
Tag3627:CTACTGGCTC
Tag3628:CTACTTGTAC
Tag3629:CTAGAACAAC
Tag3630:CTAGAACTTG
Tag3631:CTAGAAGGCC
Tag3632:CTAGACACTC
Tag3633:CTAGACCTGT
Tag3634:CTAGACGAGC
Tag3635:CTAGAGCATT
Tag3636:CTAGAGGACA
Tag3637:CTAGAGTGAT
Tag3638:CTAGATAACG
Tag3639:CTAGCAACCT
Tag3640:CTAGCAATAG
Tag3641:CTAGCAGTTA
Tag3642:CTAGCCGTAT
Tag3643:CTAGCCTCTT
Tag3644:CTAGCGACAC
Tag3645:CTAGCTAGCA
Tag3646:CTAGCTCACC
Tag3647:CTAGCTCCTG
Tag3648:CTAGCTTCGC
Tag3649:CTAGGAATCC
Tag3650:CTAGGACGCA
Tag3651:CTAGGATCAG
Tag3652:CTAGGCTAGT
Tag3653:CTAGGTAAGA
Tag3654:CTAGGTACTT
Tag3655:CTAGTACCAT
Tag3656:CTAGTCAGAA
Tag3657:CTAGTCCTAC
Tag3658:CTAGTCGACT
Tag3659:CTAGTCGCGA
Tag3660:CTAGTCTGTG
Tag3661:CTAGTGTGCC
Tag3662:CTAGTGTTGG
Tag3663:CTAGTTCTCT
Tag3664:CTATAACGGA
Tag3665:CTATACACCA
Tag3666:CTATACTAGG
Tag3667:CTATACTTCC
Tag3668:CTATAGACGT
Tag3669:CTATAGCGAG
Tag3670:CTATAGGTTG
Tag3671:CTATATGCAC
Tag3672:CTATCACACT
Tag3673:CTATCAGGAC
Tag3674:CTATCATTGG
Tag3675:CTATCCGACC
Tag3676:CTATCCGGTA
Tag3677:CTATCGAGCG
Tag3678:CTATCGCATC
Tag3679:CTATCGGCCA
Tag3680:CTATCGGTGT
Tag3681:CTATCTCGGC
Tag3682:CTATCTCTCA
Tag3683:CTATGAGATG
Tag3684:CTATGCCAGC
Tag3685:CTATGCGGAT
Tag3686:CTATGGACAA
Tag3687:CTATGGATTC
Tag3688:CTATTAGTGC
Tag3689:CTATTCCATG
Tag3690:CTGGACAGGT
Tag3691:CTGGACATAA
Tag3692:CTGGACCATC
Tag3693:CTGGACGCTT
Tag3694:CTGGACTGAG
Tag3695:CTGGAGAATA
Tag3696:CTGGAGGCAA
Tag3697:CTGGAGGTCT
Tag3698:CTGGAGTAGG
Tag3699:CTGGATACGC
Tag3700:CTGGATCGGA
Tag3701:CTGGATTACT
Tag3702:CTGGCAACTC
Tag3703:CTGGCACAAG
Tag3704:CTGGCATATT
Tag3705:CTGGCATCCA
Tag3706:CTGGCATGAC
Tag3707:CTGGCCTTGA
Tag3708:CTGGCTAATG
Tag3709:CTGGCTCGAT
Tag3710:CTGGCTGGTA
Tag3711:CTGGTAAGCC
Tag3712:CTGGTACACA
Tag3713:CTGGTAGAAC
Tag3714:CTGGTAGCTA
Tag3715:CTGGTATTAG
Tag3716:CTGGTCAAGG
Tag3717:CTGGTCGTTC
Tag3718:CTGGTCTCAA
Tag3719:CTGGTCTGCT
Tag3720:CTGGTGGAGT
Tag3721:CTGGTTGTAA
Tag3722:CTGTAACAGT
Tag3723:CTGTAACTTC
Tag3724:CTGTAATCCG
Tag3725:CTGTACCTGA
Tag3726:CTGTACGGAA
Tag3727:CTGTAGCGCT
Tag3728:CTGTAGGAGC
Tag3729:CTGTAGTCTC
Tag3730:CTGTATGATG
Tag3731:CTGTATGCCA
Tag3732:CTGTCAAGTT
Tag3733:CTGTCAGCAG
Tag3734:CTGTCCACCT
Tag3735:CTGTCCTGTC
Tag3736:CTGTCGATGG
Tag3737:CTGTCGCCAA
Tag3738:CTGTCGTACA
Tag3739:CTGTCGTGAT
Tag3740:CTGTCTAGCC
Tag3741:CTGTCTTAAC
Tag3742:CTGTCTTCTT
Tag3743:CTGTGAAGAA
Tag3744:CTGTGAATGT
Tag3745:CTGTGACAAC
Tag3746:CTGTGACTCG
Tag3747:CTGTGCATTA
Tag3748:CTGTGCGTAG
Tag3749:CTGTGCTGCA
Tag3750:CTGTGGAACC
Tag3751:CTGTGGCTAT
Tag3752:CTGTGGTTGA
Tag3753:CTGTGTCAGA
Tag3754:CTGTGTGCGT
Tag3755:CTGTGTGGAC
Tag3756:CTGTTAACAC
Tag3757:CTGTTAGGAT
Tag3758:CTGTTATAGC
Tag3759:CTGTTCTTCG
Tag3760:CTGTTGAGTA
Tag3761:CTGTTGCTCC
Tag3762:CTGTTGGCTG
Tag3763:CTTAACAAGG
Tag3764:CTTAACCGAT
Tag3765:CTTAACCTTG
Tag3766:CTTAACGCTA
Tag3767:CTTAAGACGA
Tag3768:CTTAAGTCAC
Tag3769:CTTAATCGCC
Tag3770:CTTACAATCG
Tag3771:CTTACAGAGC
Tag3772:CTTACCATGC
Tag3773:CTTACCGACG
Tag3774:CTTACCTCGG
Tag3775:CTTACGAACT
Tag3776:CTTACGAGTA
Tag3777:CTTACGCAGG
Tag3778:CTTACGTATC
Tag3779:CTTACGTTGT
Tag3780:CTTACTCTCT
Tag3781:CTTACTGTAG
Tag3782:CTTAGAAGAC
Tag3783:CTTAGATAGG
Tag3784:CTTAGCACCG
Tag3785:CTTAGCTGGC
Tag3786:CTTAGGCAAC
Tag3787:CTTAGTACGC
Tag3788:CTTAGTCCAA
Tag3789:CTTAGTGAGA
Tag3790:CTTAGTTGCA
Tag3791:CTTATACCAG
Tag3792:CTTATAGTGG
Tag3793:CTTATCAGGT
Tag3794:CTTATGACTC
Tag3795:CTTATGGCCG
Tag3796:CTTATTCGGA
Tag3797:CTTATTGGTC
Tag3798:CTTCAACCAC
Tag3799:CTTCAACGGT
Tag3800:CTTCAATAGC
Tag3801:CTTCACAACA
Tag3802:CTTCACGATG
Tag3803:CTTCACTGGA
Tag3804:CTTCAGAAGT
Tag3805:CTTCAGCATA
Tag3806:CTTCAGGTAA
Tag3807:CTTCAGTTCT
Tag3808:CTTCATATCC
Tag3809:CTTCATCACG
Tag3810:CTTCATGCTT
Tag3811:CTTCCAAGCT
Tag3812:CTTCCAATGA
Tag3813:CTTCCACGTC
Tag3814:CTTCCAGTTG
Tag3815:CTTCCGTGAA
Tag3816:CTTCCTACAA
Tag3817:CTTCCTAGGC
Tag3818:CTTCCTTAAG
Tag3819:CTTCGAGGAG
Tag3820:CTTCGCCGTT
Tag3821:CTTCGCTCTC
Tag3822:CTTCGCTTGG
Tag3823:CTTCGGAATC
Tag3824:CTTCGGACAG
Tag3825:CTTCGGTTAC
Tag3826:CTTCGTGGCT
Tag3827:CTTCTAACCG
Tag3828:CTTCTATCGT
Tag3829:CTTCTCAGAG
Tag3830:CTTCTCCAGC
Tag3831:CTTCTCGTCC
Tag3832:CTTCTGCGAT
Tag3833:CTTCTGGAGA
Tag3834:CTTCTGTGCG
Tag3835:CTTCTTATGG
Tag3836:CTTCTTCCTC
Tag3837:CTTGAACTGC
Tag3838:CTTGAAGAGG
Tag3839:CTTGAAGGTT
Tag3840:CTTGAATTCG
Tag3841:CTTGACACAT
Tag3842:CTTGACAGCG
Tag3843:CTTGAGCCAG
Tag3844:CTTGAGGATC
Tag3845:CTTGATCCTA
Tag3846:CTTGATTGAC
Tag3847:CTTGCACTCA
Tag3848:CTTGCATGGT
Tag3849:CTTGCGAAGA
Tag3850:CTTGCGATAT
Tag3851:CTTGCTATTC
Tag3852:CTTGCTGCCT
Tag3853:CTTGCTTACA
Tag3854:CTTGGACCTG
Tag3855:CTTGGAGCGA
Tag3856:CTTGGCAGTC
Tag3857:CTTGGCCTCT
Tag3858:CTTGGCGTAA
Tag3859:CTTGGCTACG
Tag3860:CTTGGTATCA
Tag3861:CTTGGTCTGG
Tag3862:CTTGGTGACC
Tag3863:CTTGGTTCGT
Tag3864:CTTGTATACC
Tag3865:CTTGTCCGCA
Tag3866:CTTGTCTTGC
Tag3867:CTTGTTACTG
Tag3868:CTTGTTGAAG
Tag3869:GATACGACTT
Tag3870:GATACGAGAC
Tag3871:GATACGCTCC
Tag3872:GATACGGAGG
Tag3873:GATACGGCAA
Tag3874:GATACGTACA
Tag3875:GATACTACGG
Tag3876:GATACTAGCT
Tag3877:GATACTCAGA
Tag3878:GATACTGACC
Tag3879:GATACTTGTG
Tag3880:GATAGAAGCC
Tag3881:GATAGACAAC
Tag3882:GATAGACCGT
Tag3883:GATAGAGGTA
Tag3884:GATAGATCAG
Tag3885:GATAGCAAGA
Tag3886:GATAGCACTC
Tag3887:GATAGCCGAG
Tag3888:GATAGCGTAT
Tag3889:GATAGCTTCG
Tag3890:GATAGGACCA
Tag3891:GATAGGCATT
Tag3892:GATAGGTGAA
Tag3893:GATAGGTTGC
Tag3894:GATAGTAACG
Tag3895:GATAGTCTGG
Tag3896:GATATACCTC
Tag3897:GATATACGCA
Tag3898:GATATAGTCG
Tag3899:GATATATGGC
Tag3900:GATATCAACC
Tag3901:GATATCCGTT
Tag3902:GATATCGCGC
Tag3903:GATATCTCCA
Tag3904:GATATGCCAT
Tag3905:GATATGCTGA
Tag3906:GATCAACAAG
Tag3907:GATCAACGGA
Tag3908:GATCAACTCC
Tag3909:GATCAAGAGT
Tag3910:GATCAAGCCA
Tag3911:GATCAATCTG
Tag3912:GATCACAACT
Tag3913:GATCACACGC
Tag3914:GATCACCATA
Tag3915:GATCACGCAG
Tag3916:GATCACGGTT
Tag3917:GATCAGAATC
Tag3918:GATCAGAGAA
Tag3919:GATCAGATGG
Tag3920:GATCAGTTAC
Tag3921:GATCATCGTC
Tag3922:GATCATTCCT
Tag3923:GATCCAATAC
Tag3924:GATCCACTTA
Tag3925:GATCCATAGA
Tag3926:GATCCATCAT
Tag3927:GATCCATGCG
Tag3928:GATCCGGACT
Tag3929:GATCCGTTGT
Tag3930:GATCCTACCA
Tag3931:GATCCTCAAC
Tag3932:GATCCTCTCG
Tag3933:GATCCTGATA
Tag3934:GATCCTGTGC
Tag3935:GATCGAATGA
Tag3936:GATCGACGCT
Tag3937:GATCGCACAA
Tag3938:GATCGCAGTG
Tag3939:GATCGCCTCA
Tag3940:GATCGCTCTT
Tag3941:GATCGCTGAC
Tag3942:GATCGGCGTA
Tag3943:GATCGGTAAT
Tag3944:GATCGTATCC
Tag3945:GATCGTGCTC
Tag3946:GATCTAGCAC
Tag3947:GATCTAGGTG
Tag3948:GATCTATTGG
Tag3949:GATCTCCTAC
Tag3950:GATCTCGAAT
Tag3951:GATCTCGGCA
Tag3952:GATCTCTTCT
Tag3953:GATCTGAACA
Tag3954:GATCTGCGAG
Tag3955:GATCTGGTTA
Tag3956:GATCTGTATG
Tag3957:GATCTTACGT
Tag3958:GATCTTCAGG
Tag3959:GATGAACATC
Tag3960:GATGAAGACG
Tag3961:GATGAAGGAT
Tag3962:GATGAAGTGC
Tag3963:GATGACACTG
Tag3964:GATGACCTAT
Tag3965:GATGACGTTA
Tag3966:GATGACTGAG
Tag3967:GATGAGCCAC
Tag3968:GATGAGCGGT
Tag3969:GATGAGGTCT
Tag3970:GATGAGTAGA
Tag3971:GATGATCACA
Tag3972:GATGATGCTT
Tag3973:GATGATGGCC
Tag3974:GATGCAACCT
Tag3975:GATGCACAGT
Tag3976:GATGCAGCGA
Tag3977:GATGCATAAG
Tag3978:GATGCCGAAC
Tag3979:GATGCCTGTT
Tag3980:GATGCCTTAA
Tag3981:GATGCGCATA
Tag3982:GATGCTAATC
Tag3983:GATGCTAGAA
Tag3984:GATGCTCCAG
Tag3985:GATGGAACTA
Tag3986:GATGGACGAA
Tag3987:GATGGAGATT
Tag3988:GATGGATGTC
Tag3989:GATGGCCATG
Tag3990:GATGGCTGCA
Tag3991:GATGGCTTGT
Tag3992:GATGGTACAC
Tag3993:GATGGTCCGA
Tag3994:GATGGTCGTT
Tag3995:GATGGTGTAG
Tag3996:GATGTCAGAT
Tag3997:GATGTCATGC
Tag3998:GATGTCCACT
Tag3999:GATGTCGAGG
Tag4000:GATGTCTCTC
Tag4001:GATGTGAAGT
Tag4002:GATGTGATCG
Tag4003:GATGTGGCTG
Tag4004:GATGTGGTAC
Tag4005:GATGTTCGCG
Tag4006:GATGTTGCAA
Tag4007:GATTAAGCTC
Tag4008:GATTACACCA
Tag4009:GATTACAGGT
Tag4010:GATTACCTTG
Tag4011:GATTACTCAC
Tag4012:GATTAGCGCG
Tag4013:GATTAGTACC
Tag4014:GATTATCTGC
Tag4015:GATTATGAGG
Tag4016:GATTCAAGTG
Tag4017:GATTCACGAC
Tag4018:GATTCACTCT
Tag4019:GATTCCGGTA
Tag4020:GATTCCGTCG
Tag4021:GATTCGCTAA
Tag4022:GATTCGTGAG
Tag4023:GATTCTCCTT
Tag4024:GATTCTTAGC
Tag4025:GATTGACAGA
Tag4026:GATTGAGTGT
Tag4027:GATTGCCACC
Tag4028:GATTGCGCCT
Tag4029:GATTGCTAGG
Tag4030:GATTGGACGC
Tag4031:GATTGGATAG
Tag4032:GATTGGCGAT
Tag4033:GATTGTAGCA
Tag4034:GATTGTTGGT
Tag4035:GCAACAAGTT
Tag4036:GCAACACGGA
Tag4037:GCAACATCAA
Tag4038:GCAACATTGG
Tag4039:GCAACCAAGA
Tag4040:GCAACCGAAC
Tag4041:GCAACCTGAG
Tag4042:GCAACGACAT
Tag4043:GCAACGGTCT
Tag4044:GCAACGTACC
Tag4045:GCAACTAGCG
Tag4046:GCAACTATAC
Tag4047:GCAACTCAGT
Tag4048:GCAACTCCTG
Tag4049:GCAACTGTGA
Tag4050:GCAACTTGTC
Tag4051:GCAAGAACAC
Tag4052:GCAAGAGATG
Tag4053:GCAAGATCTT
Tag4054:GCAAGCAGGT
Tag4055:GCAAGCCTAT
Tag4056:GCAAGCTTCC
Tag4057:GCAAGGAGCA
Tag4058:GCAAGGTAAG
Tag4059:GCAAGTACGA
Tag4060:GCAAGTATTG
Tag4061:GCAAGTGACT
Tag4062:GCAAGTGGAG
Tag4063:GCAATAACCA
Tag4064:GCAATAGGAT
Tag4065:GCAATCAATC
Tag4066:GCAATCCGTA
Tag4067:GCAATCGACG
Tag4068:GCAATCGCAA
Tag4069:GCAATCTGCT
Tag4070:GCAATGATGC
Tag4071:GCAATGCATT
Tag4072:GCAATGCTCA
Tag4073:GCAATGGTTG
Tag4074:GCAATTAAGG
Tag4075:GCACAACAAT
Tag4076:GCACAACCTC
Tag4077:GCACAAGCGT
Tag4078:GCACAAGGAA
Tag4079:GCACACAAGG
Tag4080:GCACACAGCA
Tag4081:GCACACCTTA
Tag4082:GCACAGAGAC
Tag4083:GCACAGGATT
Tag4084:GCACAGTCCT
Tag4085:GCACAGTGTG
Tag4086:GCACATACTT
Tag4087:GCACATATAG
Tag4088:GCACCAATCG
Tag4089:GCACCAGACT
Tag4090:GCACCGAGTA
Tag4091:GCACCGCTAT
Tag4092:GCACCGTTCA
Tag4093:GCACCTCACA
Tag4094:GCACCTGATC
Tag4095:GCACCTTAGG
Tag4096:GCACGAAGTG
Tag4097:GCACGACTAA
Tag4098:GCACGATGCA
Tag4099:GCACGCATTC
Tag4100:GCACGTCTGT
Tag4101:GCACTAACGC
Tag4102:GCACTACCAG
Tag4103:GCACTACGGT
Tag4104:GCACTACTCC
Tag4105:GCACTAGAGG
Tag4106:GCACTAGCTA
Tag4107:GCACTATTGA
Tag4108:GCACTCTATA
Tag4109:GCACTGCAAC
Tag4110:GCACTGGTGT
Tag4111:GCACTTAACT
Tag4112:GCACTTACAA
Tag4113:GCACTTCATG
Tag4114:GCAGAACCGA
Tag4115:GCAGAACTAG
Tag4116:GCAGAAGTCT
Tag4117:GCAGACACCT
Tag4118:GCAGACCATC
Tag4119:GCAGACTGAC
Tag4120:GCAGACTTCA
Tag4121:GCAGAGACTC
Tag4122:GCAGAGATAT
Tag4123:GCAGAGCACA
Tag4124:GCAGAGCGTT
Tag4125:GCAGATAAGC
Tag4126:GCAGATGTAA
Tag4127:GCAGATTATG
Tag4128:GCAGATTCGT
Tag4129:GCAGCAATGA
Tag4130:GCAGCATAAT
Tag4131:GCAGCCATTG
Tag4132:GCAGCGTAGA
Tag4133:GCAGCTCAAG
Tag4134:GAACAATCAC
Tag4135:GAACACATGA
Tag4136:GAACACCTCG
Tag4137:GAACACGCCT
Tag4138:GAACACTATC
Tag4139:GAACAGAAGT
Tag4140:GAACAGCTAA
Tag4141:GAACAGGACC
Tag4142:GAACAGGCGA
Tag4143:GAACATAGCC
Tag4144:GAACATCCTA
Tag4145:GAACATGGAT
Tag4146:GAACATGTCA
Tag4147:GAACCAACTT
Tag4148:GAACCACAGG
Tag4149:GAACCACGCA
Tag4150:GAACCGCATT
Tag4151:GAACCGTACG
Tag4152:GAACCGTCAA
Tag4153:GAACCTATGT
Tag4154:GAACCTCGTG
Tag4155:GAACGAAGGC
Tag4156:GAACGAGCTG
Tag4157:GAACGATTAG
Tag4158:GAACGCAACC
Tag4159:GAACGCACGT
Tag4160:GAACGCTGCT
Tag4161:GAACGGACTA
Tag4162:GAACGGCCAT
Tag4163:GAACGGCTTC
Tag4164:GAACGTAAGA
Tag4165:GAACGTAGTT
Tag4166:GAACGTTCGG
Tag4167:GAACTACACT
Tag4168:GAACTACGTC
Tag4169:GAACTCAATG
Tag4170:GAACTCCGAA
Tag4171:GAACTCGAGC
Tag4172:GAACTCTCAG
Tag4173:GAACTGGAAG
Tag4174:GAACTGTCGC
Tag4175:GAACTTACCG
Tag4176:GAACTTGCTT
Tag4177:GAAGAAGCTA
Tag4178:GAAGAATACC
Tag4179:GAAGAATGGA
Tag4180:GAAGACAGAA
Tag4181:GAAGACATTC
Tag4182:GAAGACGAGT
Tag4183:GAAGACTCGG
Tag4184:GAAGAGAACG
Tag4185:GAAGAGCAAT
Tag4186:GAAGAGGCAG
Tag4187:GAAGAGTTGT
Tag4188:GAAGATCGAC
Tag4189:GAAGATGGTG
Tag4190:GAAGATTCTC
Tag4191:GAAGCAACAA
Tag4192:GAAGCAAGCG
Tag4193:GAAGCCATCT
Tag4194:GAAGCCGGAT
Tag4195:GAAGCCTAGC
Tag4196:GAAGCCTCCA
Tag4197:GAAGCGATGC
Tag4198:GAAGCGGTCA
Tag4199:GAAGCTCCGT
Tag4200:GAAGCTCTTA
Tag4201:GAAGCTTACT
Tag4202:GAAGGAATGT
Tag4203:GAAGGACAAG
Tag4204:GAAGGAGAGC
Tag4205:GAAGGAGCCT
Tag4206:GAAGGATTCA
Tag4207:GAAGGCCTAA
Tag4208:GAAGGCTACG
Tag4209:GAAGGTCGCA
Tag4210:GAAGGTGTCC
Tag4211:GAAGGTTAAC
Tag4212:GAAGTAGACA
Tag4213:GAAGTAGTGG
Tag4214:GAAGTATCGT
Tag4215:GAAGTCACTA
Tag4216:GAAGTCAGCC
Tag4217:GAAGTCCTTG
Tag4218:GAAGTGCAGG
Tag4219:GAAGTGTGAT
Tag4220:GAAGTTAGGT
Tag4221:GAAGTTGCGC
Tag4222:GAATAACGGT
Tag4223:GAATACGAAG
Tag4224:GAATACGGCC
Tag4225:GAATACTTGC
Tag4226:GAATAGAGTG
Tag4227:GAATAGGTAC
Tag4228:GAATAGTGCT
Tag4229:GAATCACCGA
Tag4230:GAATCAGCAT
Tag4231:GAATCCAACA
Tag4232:GAATCCACTC
Tag4233:GAATCGCCTG
Tag4234:GAATCGGTGG
Tag4235:GAATCTAGAG
Tag4236:GAATCTCTCC
Tag4237:GAATGCAGTA
Tag4238:GAATGCGCAC
Tag4239:GAATGGATCT
Tag4240:GAATGGCGGA
Tag4241:GAATGTCACG
Tag4242:GAATGTCCAA
Tag4243:GAATGTTGTC
Tag4244:GAATTCCTGT
Tag4245:GAATTCGACT
Tag4246:GAATTCGCGA
Tag4247:GAATTGAACC
Tag4248:GAATTGCTCG
Tag4249:GACAACACTT
Tag4250:GACAACGATG
Tag4251:GACAACTACA
Tag4252:GACAAGCCTG
Tag4253:GACAAGGTTA
Tag4254:GACAAGTGGT
Tag4255:GACAATAGAG
Tag4256:GACAATATCC
Tag4257:GACAATGCGG
Tag4258:GACAATTAGC
Tag4259:GACACAAGTC
Tag4260:GACACACCAA
Tag4261:GACACAGGAG
Tag4262:GACACCACAC
Tag4263:GACACCTTCC
Tag4264:GACACGTAAT
Tag4265:GACACTCATT
Tag4266:GACACTGCCA
Tag4267:GACAGAGTCA
Tag4268:GACAGCAGCT
Tag4269:GACAGCTGTA
Tag4270:GACAGGAGGA
Tag4271:GACAGTCCAC
Tag4272:GACAGTGCTT
Tag4273:GACAGTGGAA
Tag4274:GACATAACCT
Tag4275:GACATACAGT
Tag4276:GACATAGAAC
Tag4277:GACATCCGGA
Tag4278:GACATCTGAT
Tag4279:GACATGACAA
Tag4280:GACATGAGTT
Tag4281:GACATGCACC
Tag4282:GACATGTAGA
Tag4283:GACATGTCTC
Tag4284:GACATTCAAG
Tag4285:GACCAAGCAT
Tag4286:GACCAATTCT
Tag4287:GACCACGTGT
Tag4288:GACCACTCGA
Tag4289:GACCAGTAAG
Tag4290:GACCATCTAC
Tag4291:GACCGACATC
Tag4292:GACCGATACA
Tag4293:GACCGATGTG
Tag4294:GACCGCATAG
Tag4295:GACCGCGTTA
Tag4296:GACCGTCAGT
Tag4297:GACCTAACGG
Tag4298:GACCTACTAT
Tag4299:GACCTGGATT
Tag4300:GACCTGTCCT
Tag4301:GACCTGTTAA
Tag4302:GACCTTAACC
Tag4303:GACCTTAGAA
Tag4304:GACCTTCCGA
Tag4305:GACCTTGTGG
Tag4306:GACGAACGTA
Tag4307:GACGAACTCG
Tag4308:GACGAATCTT
Tag4309:GACGAGAATA
Tag4310:GACGAGACCT
Tag4311:GACGATAGGA
Tag4312:GACGATCATG
Tag4313:GACGATTCCG
Tag4314:GACGCAAGGT
Tag4315:CTCAACGGAG
Tag4316:CTCAACTAGT
Tag4317:CTCAACTGCC
Tag4318:CTCAAGAGGC
Tag4319:CTCAAGATAG
Tag4320:CTCAAGCACC
Tag4321:CTCAAGGCTC
Tag4322:CTCAATCCAG
Tag4323:CTCAATCGTA
Tag4324:CTCAATGACA
Tag4325:CTCAATGTGT
Tag4326:CTCACAAGAA
Tag4327:CTCACACTTA
Tag4328:CTCACAGCGA
Tag4329:CTCACCAGTT
Tag4330:CTCACGGAAC
Tag4331:CTCACGGTCA
Tag4332:CTCACTACTC
Tag4333:CTCACTCATG
Tag4334:CTCACTTGGC
Tag4335:CTCAGAAGCG
Tag4336:CTCAGAATTC
Tag4337:CTCAGACAAG
Tag4338:CTCAGACTCT
Tag4339:CTCAGCTTAG
Tag4340:CTCAGGACAT
Tag4341:CTCAGGCAGA
Tag4342:CTCAGGTGTC
Tag4343:CTCAGTCCGT
Tag4344:CTCAGTGATT
Tag4345:CTCATACGAT
Tag4346:CTCATCATCT
Tag4347:CTCATCGTTG
Tag4348:CTCATGATGA
Tag4349:CTCATGTAGC
Tag4350:CTCATGTCTA
Tag4351:CTCATTAACG
Tag4352:CTCATTCTGC
Tag4353:CTCATTGCAT
Tag4354:CTCCAAGTCA
Tag4355:CTCCAATCCT
Tag4356:CTCCAATTGG
Tag4357:CTCCACATAT
Tag4358:CTCCACCAAG
Tag4359:CTCCAGCTTC
Tag4360:CTCCAGTGAC
Tag4361:CTCCATAGGT
Tag4362:CTCCATCAGC
Tag4363:CTCCGAACAA
Tag4364:CTCCGAGACT
Tag4365:CTCCGATGGA
Tag4366:CTCCGCAAGT
Tag4367:CTCCGCATTG
Tag4368:CTCCGCCATA
Tag4369:CTCCGTAGAG
Tag4370:CTCCGTGTTC
Tag4371:CTCCGTTAAC
Tag4372:CTCCTACACC
Tag4373:CTCCTACCTG
Tag4374:CTCCTAGATA
Tag4375:CTCCTCGCAA
Tag4376:CTCCTCGGTT
Tag4377:CTCCTGAATG
Tag4378:CTCCTGCGTA
Tag4379:CTCCTGCTCT
Tag4380:CTCCTTAGCC
Tag4381:CTCGAACCTT
Tag4382:CTCGAAGGAA
Tag4383:CTCGACCTCA
Tag4384:CTCGACGTAC
Tag4385:CTCGAGAGCA
Tag4386:CTCGAGTTAA
Tag4387:CTCGATAATC
Tag4388:CTCGATCGCT
Tag4389:CTCGCATAGA
Tag4390:CTCGCATCAT
Tag4391:CTCGCCTAAC
Tag4392:CTCGCTGAGT
Tag4393:CTCGGATGTG
Tag4394:CTCGGCTCTA
Tag4395:CTCGGTCGAA
Tag4396:CTCGTAGGTC
Tag4397:CTCGTCTATT
Tag4398:CTCGTGATCC
Tag4399:CTCGTTACAA
Tag4400:CTCGTTCAGG
Tag4401:CTCGTTGTCG
Tag4402:CTCTAAGCAT
Tag4403:CTCTAATGTC
Tag4404:CTCTACGTTA
Tag4405:CTCTAGCCTA
Tag4406:CTCTAGTCGG
Tag4407:CTCTATACTG
Tag4408:CTCTATTGAG
Tag4409:CTCTCAGATC
Tag4410:CTCTCATGCG
Tag4411:CTCTCCAACG
Tag4412:CTCTCCACTA
Tag4413:CTCTCCTCGT
Tag4414:CTCTCGATAA
Tag4415:CTCTCTACAT
Tag4416:CTCTCTCTAG
Tag4417:CTCTGAGGTA
Tag4418:CTCTGATTCA
Tag4419:CTCTGCCAAT
Tag4420:CTCTGCTCAC
Tag4421:CTCTGGAGCT
Tag4422:CTCTGGTATT
Tag4423:CTCTGTGAGG
Tag4424:CTCTTAACCT
Tag4425:CTCTTAGTAG
Tag4426:CTCTTCAGCA
Tag4427:CTCTTCATTC
Tag4428:CTCTTGCAAC
Tag4429:CTCTTGCTGG
Tag4430:CTGAACCACG
Tag4431:CTGAACGTAT
Tag4432:CTGAAGAGAT
Tag4433:CTGAAGCTTA
Tag4434:CTGAAGGCGT
Tag4435:CTGAAGTTGC
Tag4436:CTGACCTTCC
Tag4437:CTGACGACCA
Tag4438:CTGACGTGTG
Tag4439:CTGAGAGTCC
Tag4440:CTGAGCAAGC
Tag4441:CTGAGCTTGT
Tag4442:CTGAGGAATT
Tag4443:CTGAGTCAAT
Tag4444:CTGATACTGT
Tag4445:CTGATGCGTC
Tag4446:CTGATGTCCT
Tag4447:CTGATTCCGG
Tag4448:CTGCACACTG
Tag4449:CTGCACGAGT
Tag4450:CTGCAGATCG
Tag4451:CTGCAGGAAG
Tag4452:CTGCCAACAT
Tag4453:CTGCCATTGC
Tag4454:CTGCCTCATC
Tag4455:CTGCCTTAGT
Tag4456:CTGCGAAGTG
Tag4457:CTGCGTACTC
Tag4458:CTGCTACCAA
Tag4459:CTGCTGCTTG
Tag4460:CTGCTTGACG
Tag4461:GCAGGATGGT
Tag4462:GCAGGTAATA
Tag4463:GCAGGTTCAA
Tag4464:GCAGTAACAT
Tag4465:GCAGTAATTC
Tag4466:GCAGTACACG
Tag4467:GCAGTCAGGA
Tag4468:GCAGTCTCTG
Tag4469:GCAGTCTTAT
Tag4470:GCAGTGTATC
Tag4471:GCAGTTAGAC
Tag4472:GCAGTTGAGT
Tag4473:GCATAACGTA
Tag4474:GCATAAGATC
Tag4475:GCATACACAC
Tag4476:GCATACTCTA
Tag4477:GCATAGCCAA
Tag4478:GCATAGGCTG
Tag4479:GCATAGTTAG
Tag4480:GCATATACCG
Tag4481:GCATATCACT
Tag4482:GCATATGGAC
Tag4483:GCATCACATT
Tag4484:GCATCATAGC
Tag4485:GCATCCGATG
Tag4486:GCATCCTACT
Tag4487:GCATCGGTTC
Tag4488:GCATCTTCTT
Tag4489:GCATGAAGAA
Tag4490:GCATGAGTAC
Tag4491:GCATGCTGGA
Tag4492:GCATGGACTT
Tag4493:GCATGGATGA
Tag4494:GCATGGCATC
Tag4495:GCATGTAGCC
Tag4496:GCATGTGCGT
Tag4497:GCATGTGTTA
Tag4498:GCATTATGTC
Tag4499:GCATTCAGCG
Tag4500:GCATTCCAAT
Tag4501:GCATTCCTTC
Tag4502:GCATTCTCGC
Tag4503:GCATTGGTAA
Tag4504:GCCAACAGAC
Tag4505:GCCAACATTA
Tag4506:GCCAACTTCG
Tag4507:GCCAAGATGG
Tag4508:GCCAAGTAAC
Tag4509:GCCAAGTCTA
Tag4510:GCCAATAATG
Tag4511:GCCAATACAA
Tag4512:GCCAATGAGA
Tag4513:GCCAATGTTC
Tag4514:GCCAATTGCA
Tag4515:GCCACAATCC
Tag4516:GCCACCTAGT
Tag4517:GCCACGTTAA
Tag4518:GCCACTGAAT
Tag4519:GCCACTTCCT
Tag4520:GCCAGAATAA
Tag4521:GCCAGATACG
Tag4522:GCCAGATGAT
Tag4523:GCCAGCAACA
Tag4524:GCCAGCTATC
Tag4525:GCCAGGCAAT
Tag4526:GCCAGGTTCT
Tag4527:GCCATAAGGT
Tag4528:GCCATAGATA
Tag4529:GCCATAGCAG
Tag4530:GCCATATGTG
Tag4531:GCCATATTAC
Tag4532:GCCATCCTTG
Tag4533:GCCATCGTGA
Tag4534:GCCATGGTAT
Tag4535:GCCATTACTC
Tag4536:GCCATTCGAC
Tag4537:GCCGAATATC
Tag4538:GCCGAATCCA
Tag4539:GCCGACTTGT
Tag4540:GCCGATTAAT
Tag4541:GCCGCAGATT
Tag4542:GCCGCATGTA
Tag4543:GCCGCTACAT
Tag4544:GCCGGTAAGT
Tag4545:GCCGGTCTTA
Tag4546:GCCGGTGTAT
Tag4547:GCCGTAATCT
Tag4548:GCCGTACCTT
Tag4549:GCCGTATAGG
Tag4550:GCCGTCAATG
Tag4551:GCCGTCATAA
Tag4552:GCCGTGAACA
Tag4553:GCCGTGGTTA
Tag4554:GCCGTTATGC
Tag4555:GCCGTTGAAG
Tag4556:GCCTAACACA
Tag4557:GCCTAAGAAG
Tag4558:GCCTACAAGT
Tag4559:GCCTACCGAT
Tag4560:GCCTACGCAA
Tag4561:GCCTAGAGTC
Tag4562:GCCTAGGACT
Tag4563:GCCTAGTAGA
Tag4564:GCCTAGTCAT
Tag4565:GCCTAGTTCC
Tag4566:GCCTATATCA
Tag4567:GCCTATCCAC
Tag4568:GCCTCAACTC
Tag4569:GCCTCACTAG
Tag4570:GCCTCATGAC
Tag4571:GCCTCCTGTT
Tag4572:GCCTCGAGAT
Tag4573:GCCTCGATTA
Tag4574:GCCTCTATGG
Tag4575:GCCTCTCAGA
Tag4576:GCCTCTCTTC
Tag4577:GCCTCTGTAA
Tag4578:GCCTGACGTT
Tag4579:GCCTGATCAA
Tag4580:GCCTGATTGC
Tag4581:GCCTGCTAAG
Tag4582:GCCTGTACTG
Tag4583:GCCTGTTATT
Tag4584:GCCTTAACGA
Tag4585:GCCTTACTTA
Tag4586:GCCTTATCCT
Tag4587:GCCTTCACAT
Tag4588:GCCTTCCTCT
Tag4589:GCCTTCGTAG
Tag4590:GCCTTCTGCA
Tag4591:GCCTTGATCG
Tag4592:GCCTTGCAGT
Tag4593:GCCTTGCGAA
Tag4594:GCGAACCTAA
Tag4595:GCGAACTGGT
Tag4596:GCGAAGAATT
Tag4597:GCGAAGATCC
Tag4598:GCGAAGGTGA
Tag4599:GCGAAGTAGG
Tag4600:GCGAAGTGTC
Tag4601:GCGAAGTTAT
Tag4602:GCGAATCAGC
Tag4603:GCGAATGCCT
Tag4604:GCGACAACTG
Tag4605:GCGACAATAT
Tag4606:GCGACCTCAT
Tag4607:GCGACCTTGA
Tag4608:GCGACTCGTA
Tag4609:GCGACTTACG
Tag4610:GCGAGAAGAG
Tag4611:GCGAGATGGA
Tag4612:GCGAGCCATA
Tag4613:GACGCATTGA
Tag4614:GACGCCAGTA
Tag4615:GACGCGGTAT
Tag4616:GACGCTATAC
Tag4617:GACGCTTGTC
Tag4618:GACGGAGTAC
Tag4619:GACGGATAGT
Tag4620:GACGGTAACA
Tag4621:GACGGTATGG
Tag4622:GACGGTGATC
Tag4623:GACGGTTCTA
Tag4624:GACGTACTGC
Tag4625:GACGTATCAA
Tag4626:GACGTCGATA
Tag4627:GACGTCTAAG
Tag4628:GACGTGTGCA
Tag4629:GACGTTCTCT
Tag4630:GACGTTGGAC
Tag4631:GACTAAGCGA
Tag4632:GACTAAGTTG
Tag4633:GACTAATACG
Tag4634:GACTACATGG
Tag4635:GACTACCATC
Tag4636:GACTAGCTCT
Tag4637:GACTAGGAGC
Tag4638:GACTATGGCA
Tag4639:GACTATTCGT
Tag4640:GACTCAGACC
Tag4641:GACTCATCCA
Tag4642:GACTCCACCT
Tag4643:GACTCCTTAG
Tag4644:GACTCTACGC
Tag4645:GACTCTAGTT
Tag4646:GACTCTCTGT
Tag4647:GACTCTTGCG
Tag4648:GACTGAATCC
Tag4649:GACTGATAAC
Tag4650:GACTGCAATT
Tag4651:GACTGGTCTG
Tag4652:GACTTAGGTC
Tag4653:GACTTCCACG
Tag4654:GACTTCGTCC
Tag4655:GACTTGATTC
Tag4656:GACTTGCGTG
Tag4657:GAGAACAGAT
Tag4658:GAGAACGCAC
Tag4659:GAGAAGCCGT
Tag4660:GAGAAGCGAA
Tag4661:GAGAATAGCA
Tag4662:GAGAATGAGT
Tag4663:GAGAATGTCG
Tag4664:GAGACAAGGA
Tag4665:GAGACACAAG
Tag4666:GAGACAGAGC
Tag4667:GAGACATGTT
Tag4668:GAGACCAGTG
Tag4669:GAGACCGGAA
Tag4670:GAGACCTCTC
Tag4671:GAGACGGTTG
Tag4672:GAGACGTCCT
Tag4673:GAGAGAACTT
Tag4674:GAGAGACGTG
Tag4675:GAGAGCATCC
Tag4676:GAGAGCCTGA
Tag4677:GAGAGCTAAC
Tag4678:GAGAGGAAGG
Tag4679:GAGAGGAGTC
Tag4680:GAGAGGTATA
Tag4681:GAGAGTCTAT
Tag4682:GAGAGTGGCT
Tag4683:GAGATACTGG
Tag4684:GAGATATACG
Tag4685:GAGATCACGT
Tag4686:GAGATCGATT
Tag4687:GAGATCGTCA
Tag4688:GAGATGAGAG
Tag4689:GAGATTCGCC
Tag4690:GAGATTGCTA
Tag4691:GAGCAAGTAA
Tag4692:GAGCACTTAT
Tag4693:GAGCAGACAG
Tag4694:GAGCAGCTTG
Tag4695:GAGCATCCAT
Tag4696:GAGCATGATG
Tag4697:GAGCATTACC
Tag4698:GAGCCAATCA
Tag4699:GAGCCTACAC
Tag4700:GAGCCTTCGT
Tag4701:GAGCGACCAA
Tag4702:GAGCGAGAAC
Tag4703:GAGCGATATT
Tag4704:GAGCGTGACA
Tag4705:GAGCTAAGAT
Tag4706:GAGCTCACTC
Tag4707:GAGCTCCACA
Tag4708:GAGCTCTGGT
Tag4709:GAGCTGCCTA
Tag4710:GAGCTGGCAT
Tag4711:GAGCTTATGA
Tag4712:GAGGAATTAC
Tag4713:GAGGACGATC
Tag4714:GAGGACTTCG
Tag4715:GAGGAGATAA
Tag4716:GAGGAGTATG
Tag4717:GAGGATAACT
Tag4718:GAGGATCTAG
Tag4719:GAGGATGCGA
Tag4720:GAGGATTGAA
Tag4721:GAGGCAAGAC
Tag4722:GAGGCAATTG
Tag4723:GAGGCACCTA
Tag4724:GAGGCAGTCT
Tag4725:GAGGCATACA
Tag4726:GAGGCCACAT
Tag4727:GAGGCGTGTA
Tag4728:GAGGCTGAAT
Tag4729:GAGGTAACGC
Tag4730:GAGGTACATT
Tag4731:GAGGTACGGA
Tag4732:GAGGTAGTTC
Tag4733:GAGGTATGCT
Tag4734:GAGGTCTGTG
Tag4735:GAGGTGCAAC
Tag4736:GAGGTGGTGA
Tag4737:GAGGTGTCTT
Tag4738:GAGGTTAGTA
Tag4739:GAGGTTCCTG
Tag4740:GAGTAACCTT
Tag4741:GAGTAAGCAG
Tag4742:GAGTAAGTCC
Tag4743:GAGTAATTGG
Tag4744:GAGTACATAC
Tag4745:GAGTACTGTA
Tag4746:GAGTAGGCCT
Tag4747:GAGTAGTGAC
Tag4748:GAGTATTCTG
Tag4749:GAGTCAATGT
Tag4750:GAGTCCAAGG
Tag4751:GAGTCCTATT
Tag4752:GAGTCGAGCA
Tag4753:GAGTCGCTTC
Tag4754:GAGTCTCATA
Tag4755:GAGTCTTGGA
Tag4756:GAGTGCGTAA
Tag4757:GAGTGGCAAG
Tag4758:GAGTGGTTAT
Tag4759:GAGTGTAATG
Tag4760:GAGTGTACGT
Tag4761:GAGTGTCTCA
Tag4762:GAGTTAACCG
Tag4763:GAGTTAGAGA
Tag4764:GAGTTCACAA
Tag4765:GAGTTCAGCT
Tag4766:GAGTTCGAAC
Tag4767:GAGTTGAGGC
Tag4768:GAGTTGGCTC
Tag4769:GAGTTGTCGG
Tag4770:GATAACCACG
Tag4771:GATAACTGTC
Tag4772:GGCATAGTGG
Tag4773:GGCATATCCA
Tag4774:GGCATCAACT
Tag4775:GGCATCACGA
Tag4776:GGCATCGAAG
Tag4777:GGCATCTCAC
Tag4778:GGCATGAATA
Tag4779:GGCATGCGAT
Tag4780:GGCATGTACG
Tag4781:GGCATGTTGC
Tag4782:GGCATTCCGT
Tag4783:GGCATTCTAA
Tag4784:GGCATTGGCA
Tag4785:GGCCAACACT
Tag4786:GGCCAACGAA
Tag4787:GGCCAAGTGA
Tag4788:GGCCAATAGC
Tag4789:GGCCACAATA
Tag4790:GGCCAGACTT
Tag4791:GGCCAGTACA
Tag4792:GGCCATCATC
Tag4793:GGCCATCTGT
Tag4794:GGCCATGCTA
Tag4795:GGCCATTCAG
Tag4796:GGCCGAATTG
Tag4797:GGCCGAGTAT
Tag4798:GGCCGCTATT
Tag4799:GGCCGCTTAA
Tag4800:GGCCGTTGTA
Tag4801:GGCCTAAGAC
Tag4802:GGCCTACATG
Tag4803:GGCCTACTCA
Tag4804:GGCCTATGGA
Tag4805:GGCCTTAATT
Tag4806:GGCCTTGAAC
Tag4807:GGCGAACAAC
Tag4808:GGCGAAGGTT
Tag4809:GGCGAATTAA
Tag4810:GGCGACATAG
Tag4811:GGCGACGAAT
Tag4812:GGCGAGAGAA
Tag4813:GGCGAGATGT
Tag4814:GGCGATAGCT
Tag4815:GGCGATCCTT
Tag4816:GGCGATGTCA
Tag4817:GGCGATTAGG
Tag4818:GGCGATTGAC
Tag4819:GGCGCACTAT
Tag4820:GGCGCCAATT
Tag4821:GGCGCTGATA
Tag4822:GGCGGAAGTA
Tag4823:GGCGGATCAT
Tag4824:GGCGGTAATG
Tag4825:GGCGTACAGA
Tag4826:GGCGTAGATC
Tag4827:GGCGTCATTC
Tag4828:GGCGTCTACA
Tag4829:GGCGTGTGTT
Tag4830:GGCGTGTTAG
Tag4831:GGCGTTATAT
Tag4832:GGCTAACAGG
Tag4833:GGCTAACCTC
Tag4834:GGCTAATGAG
Tag4835:GGCTACAGTT
Tag4836:GGCTACCTGA
Tag4837:GGCTACGTAC
Tag4838:GGCTAGAACG
Tag4839:GGCTAGCTAG
Tag4840:GGCTAGTATT
Tag4841:GGCTATATGC
Tag4842:GGCTATCGTG
Tag4843:GGCTCAAGCA
Tag4844:GGCTCCATAA
Tag4845:GGCTCCTCAT
Tag4846:GGCTCGCAAT
Tag4847:GGCTCGTCTA
Tag4848:GGCTCTAATC
Tag4849:GGCTCTGACT
Tag4850:GGCTCTGTTG
Tag4851:GGCTGACTGT
Tag4852:GGCTGAGACA
Tag4853:GGCTGATTCG
Tag4854:GGCTGGATAC
Tag4855:GGCTGGTGAA
Tag4856:GGCTGTCCAT
Tag4857:GGCTGTTACC
Tag4858:GGCTTAGCAT
Tag4859:GGCTTCGAGT
Tag4860:GGCTTCTTGG
Tag4861:GGCTTGACCA
Tag4862:GGCTTGCCTT
Tag4863:GGCTTGGATG
Tag4864:GCGAGTATCA
Tag4865:GCGATACAAT
Tag4866:GCGATGACTA
Tag4867:GCGATGCAGA
Tag4868:GCGATGGAAG
Tag4869:GCGATTAGAA
Tag4870:GCGATTGTCC
Tag4871:GCGCAATTGT
Tag4872:GCGCACACAA
Tag4873:GCGCACATCT
Tag4874:GCGCACTAAG
Tag4875:GCGCATCGTT
Tag4876:GCGCCATATA
Tag4877:GCGCGAACAT
Tag4878:GCGCGGTTAA
Tag4879:GCGCGTTCTT
Tag4880:GCGCTAAGGA
Tag4881:GCGCTCTTCA
Tag4882:GCGCTGAATC
Tag4883:GCGCTGTGAT
Tag4884:GCGCTTCTAC
Tag4885:GCGGACGTAT
Tag4886:GCGGAGCTTA
Tag4887:GCGGAGTCAA
Tag4888:GCGGATACAG
Tag4889:GCGGATATTC
Tag4890:GCGGATGAAC
Tag4891:GCGGTGATGT
Tag4892:GCGGTGTTAC
Tag4893:GCGGTTAACC
Tag4894:GCGGTTCCAT
Tag4895:GCGGTTGATA
Tag4896:GCGTAACGCT
Tag4897:GCGTAATAAC
Tag4898:GCGTAATCGA
Tag4899:GCGTACGACA
Tag4900:GCGTATAGAT
Tag4901:GCGTATCTCG
Tag4902:GCGTATGGTA
Tag4903:GCGTATGTGC
Tag4904:GCGTCAGAGT
Tag4905:GCGTCAGTCA
Tag4906:GCGTCGTGAA
Tag4907:GCGTCGTTGT
Tag4908:GCGTGAATTA
Tag4909:GCGTGACATG
Tag4910:GCGTGAGGAT
Tag4911:GCGTGCTAGT
Tag4912:GCGTGGACAA
Tag4913:GCGTGTAACT
Tag4914:GCGTTAAGTG
Tag4915:GCGTTACCAA
Tag4916:GCGTTATTAG
Tag4917:GCGTTCAAGA
Tag4918:GCGTTCGCTT
Tag4919:GCGTTCTATG
Tag4920:GCGTTGTACA
Tag4921:GCTAACCGTG
Tag4922:GCTAACGGCA
Tag4923:GCTAAGACGC
Tag4924:GCTAAGGATA
Tag4925:GCTAATCTAC
Tag4926:GCTACACATA
Tag4927:GCTACACGAG
Tag4928:GCTACAGGTC
Tag4929:GCTACAGTAA
Tag4930:GCTACATCGC
Tag4931:GCTACCACGT
Tag4932:GCTACCTATG
Tag4933:GCTACTGTCG
Tag4934:GCTACTTGAA
Tag4935:GCTAGAATGG
Tag4936:GCTAGATAGT
Tag4937:GCTAGATCCA
Tag4938:GCTAGCCTTC
Tag4939:GCTAGCGCTA
Tag4940:GCTAGGAGAT
Tag4941:GCTAGGTCTC
Tag4942:GCTAGTGTGT
Tag4943:GCTATACAGC
Tag4944:GCTATAGCTT
Tag4945:GCTATCGTCT
Tag4946:GCTATCTTAG
Tag4947:GCTATGACCT
Tag4948:GCTATGAGGA
Tag4949:GCTATTCACA
Tag4950:GCTATTGATC
Tag4951:GCTATTGCGA
Tag4952:GCTCAACCAA
Tag4953:GCTCAAGTAT
Tag4954:GCTCACGTTC
Tag4955:GCTCACTACA
Tag4956:GCTCAGACTA
Tag4957:GCTCATAAGA
Tag4958:GCTCATCACC
Tag4959:GCTCATGCTG
Tag4960:GCTCATTGTA
Tag4961:GCTCCAATGT
Tag4962:GCTCCATTCC
Tag4963:GCTCCGTCTT
Tag4964:GCTCCTAGTC
Tag4965:GCTCGCGTAA
Tag4966:GCTCGGAACT
Tag4967:GCTCGTATAT
Tag4968:GCTCGTTACG
Tag4969:GCTCTAAGCC
Tag4970:GCTCTATAAC
Tag4971:GCTCTATCCG
Tag4972:GCTCTCCAGT
Tag4973:GCTCTGAAGG
Tag4974:GCTCTGGTAG
Tag4975:GCTCTGTGTC
Tag4976:GCTCTTCCTA
Tag4977:GCTCTTCGAT
Tag4978:GCTGAATCAT
Tag4979:GCTGACAACC
Tag4980:GCTGACGAAG
Tag4981:GCTGAGAGCT
Tag4982:GCTGAGTTGG
Tag4983:GCTGATCAGG
Tag4984:GCTGCACTTG
Tag4985:GCTGCCGATA
Tag4986:GCTGCGATTC
Tag4987:GCTGCTAACA
Tag4988:GCTGCTCTAT
Tag4989:GCTGCTTCTG
Tag4990:GCTGCTTGGT
Tag4991:GCTGGAAGGA
Tag4992:GCTGGATTAA
Tag4993:GCTGGCCAAT
Tag4994:GGTAACAGTA
Tag4995:GGTAACCTGG
Tag4996:GGTAACGATT
Tag4997:GGTAACGCGA
Tag4998:GGTAACTAAG
Tag4999:GGTAACTTCA
Tag5000:GGTAAGAACA
Tag5001:GGTAAGCAAT
Tag5002:GGTAAGGCAC
Tag5003:GGTAAGGTTG
Tag5004:GGTAAGTCTT
Tag5005:GGTAATACCT
Tag5006:GGTAATGGTC
Tag5007:GGTAATTCGC
Tag5008:GGTACAAGAA
Tag5009:GGTACAATCT
Tag5010:GGTACAGCCA
Tag5011:GGTACATAGG
Tag5012:GGTACCAACG
Tag5013:GGTACCGCAT
Tag5014:GGTACCTTGC
Tag5015:GGTACGAGTG
Tag5016:GGTACGCTGT
Tag5017:GGTACTACTC
Tag5018:GGTACTTAAC
Tag5019:GGTACTTCCG
Tag5020:GGTAGAATAC
Tag5021:GGTAGACACT
Tag5022:GGTAGACTGA
Tag5023:GGTAGCATTG
Tag5024:GGTAGCGGAA
Tag5025:GGTAGCTATA
Tag5026:GGTAGCTCCT
Tag5027:GGTAGGAAGC
Tag5028:GGTAGTCGGT
Tag5029:GGTAGTGAAT
Tag5030:GGTAGTTCAA
Tag5031:GGTATAAGTC
Tag5032:GGTATACTTG
Tag5033:GGTATCACAG
Tag5034:GGTATCATGT
Tag5035:GGTATCCTCC
Tag5036:GGTATGCAGG
Tag5037:GGTATGTATC
Tag5038:GGTATGTCGA
Tag5039:GGTATTGACG
Tag5040:GGTCAACGTG
Tag5041:GGTCAATTAG
Tag5042:GGTCACACAT
Tag5043:GGTCACATCG
Tag5044:GGTCACTGAA
Tag5045:GGTCATAGAC
Tag5046:GGTCATCGCA
Tag5047:GGTCCACCTT
Tag5048:GGTCCAGAAT
Tag5049:GGTCCATGGT
Tag5050:GGTCCGAAGA
Tag5051:GGTCCTTACA
Tag5052:GGTCGAACCA
Tag5053:GGTCGAGATA
Tag5054:GGTCGGATTC
Tag5055:GGTCGGCTAA
Tag5056:GGTCGTAAGT
Tag5057:GGTCGTCTCT
Tag5058:GGTCGTGTGA
Tag5059:GGTCTAGCCT
Tag5060:GGTCTAGTGC
Tag5061:GGTCTATCAA
Tag5062:GGTCTCCAAG
Tag5063:GGTCTCCTTA
Tag5064:GGTCTCTACC
Tag5065:GGTCTGAGGT
Tag5066:GGTCTGTTCA
Tag5067:GGTCTTAGTA
Tag5068:GGTCTTGCAG
Tag5069:GGTGAACCGT
Tag5070:GGTGAAGAGA
Tag5071:GGTGAATCTC
Tag5072:GGTGAATGCG
Tag5073:GGTGACTAGC
Tag5074:GGTGAGAAGG
Tag5075:GGTGAGCCTA
Tag5076:GGTGAGTACT
Tag5077:GGTGATACGA
Tag5078:GGTGATAGTG
Tag5079:GGTGATCTAA
Tag5080:GGTGCAACAC
Tag5081:GGTGCAAGTT
Tag5082:GGTGCAGTAG
Tag5083:GGTGCATTCA
Tag5084:GGTGCCATAT
Tag5085:GGTGCGTCAT
Tag5086:GGTGCTATCC
Tag5087:GGTGCTTATT
Tag5088:GGTGGCAATC
Tag5089:GGTGGCTGAT
Tag5090:GGTGGTATTA
Tag5091:GGTGGTTAGA
Tag5092:GGTGTACCAG
Tag5093:GGTGTAGGCA
Tag5094:GGTGTATTGT
Tag5095:GGTGTCACCT
Tag5096:GGTGTCGCTA
Tag5097:GGTGTGACTC
Tag5098:GGTGTGATAA
Tag5099:GGTGTGCATT
Tag5100:GGTGTTAAGC
Tag5101:GGTGTTCGTC
Tag5102:GGTGTTCTGG
Tag5103:GGTTAACACC
Tag5104:GGTTAAGGAA
Tag5105:GGTTAATCCA
Tag5106:GGTTACAATG
Tag5107:GGTTACCGTC
Tag5108:GGTTACTCGG
Tag5109:GGTTAGACAA
Tag5110:GGTTAGATCT
Tag5111:GGTTAGGCGT
Tag5112:GGTTAGTTGA
Tag5113:GGTTATCGAT
Tag5114:GGTTCAACTA
Tag5115:GGTTCACGGA
Tag5116:GGTTCATATC
Tag5117:GGTTCCAGAC
Tag5118:GGTTCCGTGT
Tag5119:GGTTCCTGCA
Tag5120:GGTTCGAATT
Tag5121:GGTTCGATGC
Tag5122:GGTTCGCACA
Tag5123:GGTTCGGAAG
Tag5124:GGTTCTAAGG
Tag5125:GGTTCTACAT
Tag5126:GGTTCTCTAG
Tag5127:GGTTCTGGTT
Tag5128:GGTTCTTCGA
Tag5129:GGTTGACCTG
Tag5130:GGTTGAGAAC
Tag5131:GGTTGAGCGA
Tag5132:GGTTGCGTTA
Tag5133:GGTTGCTCTC
Tag5134:GGTTGGAGTA
Tag5135:GGTTGGTACG
Tag5136:GGTTGTCATA
Tag5137:GGTTGTTGTG
Tag5138:GTAACACACC
Tag5139:GTAACACCGT
Tag5140:GTAACAGGAA
Tag5141:GTAACAGTGC
Tag5142:GTAACATCTG
Tag5143:GTAACCAGAT
Tag5144:GTAACCATCA
Tag5145:GTAACCGCTC
Tag5146:GTAACCTGTA
Tag5147:GTAACGAACG
Tag5148:GTAACGCCTA
Tag5149:GTAACGTCAC
Tag5150:GTAACTATGG
Tag5151:GTAACTGCAT
Tag5152:GTAACTTAGC
Tag5153:GTAAGACGTA
Tag5154:GTAAGATGAG
Tag5155:GTAAGCACAG
Tag5156:GTAAGCCGAC
Tag5157:GTAAGCGAGG
Tag5158:GTAAGGAATC
Tag5159:GTAAGGCAGT
Tag5160:GTAAGGTGTT
Tag5161:GTAAGTCGCG
Tag5162:GTAAGTCTGA
Tag5163:GTAAGTGTAC
Tag5164:GTAATACTCG
Tag5165:GTAATCACGC
Tag5166:GTAATCGTAG
Tag5167:GTAATGCGGC
Tag5168:GTAATGGACA
Tag5169:GTAATGTCGT
Tag5170:GTAATTGGCC
Tag5171:GCTGGTACCT
Tag5172:GCTGTAAGAG
Tag5173:GCTGTAGTGA
Tag5174:GCTGTATCTA
Tag5175:GCTGTCCTCA
Tag5176:GCTGTCTCGT
Tag5177:GCTGTGGAAT
Tag5178:GCTGTTCAAC
Tag5179:GCTGTTGTTG
Tag5180:GCTTAACTGG
Tag5181:GCTTACACTT
Tag5182:GCTTACATAG
Tag5183:GCTTAGTATG
Tag5184:GCTTATTGCT
Tag5185:GCTTCACCGT
Tag5186:GCTTCAGCAC
Tag5187:GCTTCCAGGA
Tag5188:GCTTCCTTAT
Tag5189:GCTTCGGCTA
Tag5190:GCTTGAGACG
Tag5191:GCTTGCAATA
Tag5192:GCTTGGATCC
Tag5193:GCTTGGTCGA
Tag5194:GCTTGGTGTT
Tag5195:GCTTGTGCCA
Tag5196:GCTTGTTCAG
Tag5197:GGAACAACAG
Tag5198:GGAACACTCA
Tag5199:GGAACATACT
Tag5200:GGAACATGGC
Tag5201:GGAACCATTC
Tag5202:GGAACCTCTT
Tag5203:GGAACGAGGA
Tag5204:GGAACGCTAG
Tag5205:GGAACGGATG
Tag5206:GGAACTCATA
Tag5207:GGAACTCTGC
Tag5208:GGAAGACAGG
Tag5209:GGAAGACCAT
Tag5210:GGAAGAGGCT
Tag5211:GGAAGAGTTA
Tag5212:GGAAGATAAC
Tag5213:GGAAGCATGA
Tag5214:GGAAGGCTCT
Tag5215:GGAAGTGAGA
Tag5216:GGAAGTTACG
Tag5217:GGAATACATC
Tag5218:GGAATAGCGC
Tag5219:GGAATCAGAA
Tag5220:GGAATCCGGT
Tag5221:GGAATCTATG
Tag5222:GGAATGACTG
Tag5223:GGAATGGAAT
Tag5224:GGAATGTGCA
Tag5225:GGAATTAGCT
Tag5226:GGAATTCGTG
Tag5227:GGACAAGTAC
Tag5228:GGACAATCGA
Tag5229:GGACACCTAT
Tag5230:GGACACTTGG
Tag5231:GGACATAACA
Tag5232:GGACCAATAA
Tag5233:GGACCAGGTT
Tag5234:GGACCGTAAC
Tag5235:GGACCTATTG
Tag5236:GGACCTGCAA
Tag5237:GGACGACATT
Tag5238:GGACGATGAT
Tag5239:GGACGTAGAA
Tag5240:GGACGTTATC
Tag5241:GGACTCACAC
Tag5242:GGACTCGGAT
Tag5243:GGACTCTCCT
Tag5244:GGACTGCAGT
Tag5245:GGACTGCTTG
Tag5246:GGACTGTGAG
Tag5247:GGACTTCTGA
Tag5248:GGACTTGATA
Tag5249:GGACTTGTCG
Tag5250:GGAGAACATG
Tag5251:GGAGACGACA
Tag5252:GGAGACTGCT
Tag5253:GGAGAGGAAC
Tag5254:GGAGAGTCTG
Tag5255:GGAGAGTTCC
Tag5256:GGAGATGTGG
Tag5257:GGAGCAACGT
Tag5258:GGAGCACTTC
Tag5259:GGAGCCGTTA
Tag5260:GGAGCGAATC
Tag5261:GGAGCTCGAA
Tag5262:GGAGGAGAAT
Tag5263:GGAGGATTGC
Tag5264:GGAGGTACAG
Tag5265:GGAGTAATAG
Tag5266:GGAGTAGCTT
Tag5267:GGAGTCCTCT
Tag5268:GGAGTTACCA
Tag5269:GGAGTTGGAG
Tag5270:GGATAACTCG
Tag5271:GGATAAGTGT
Tag5272:GGATACAAGC
Tag5273:GGATACCGAA
Tag5274:GGATAGATTC
Tag5275:GGATAGGTCA
Tag5276:GGATATCTAC
Tag5277:GGATCAGCTG
Tag5278:GGATCCGTAG
Tag5279:GGATCGCGTT
Tag5280:GGATCTATCT
Tag5281:GGATCTTAAG
Tag5282:GGATGATCGG
Tag5283:GGATGCACCA
Tag5284:GGATGCTTAC
Tag5285:GGATGGTAGT
Tag5286:GGATTAACCT
Tag5287:GGATTCATCC
Tag5288:GGATTCCAGG
Tag5289:GGATTGAGAT
Tag5290:GGATTGTGGC
Tag5291:GGCAAGGAGT
Tag5292:GGCAATCTCG
Tag5293:GGCAGTGTCT
Tag5294:GGCATAAGCG
Tag5295:GTTCATCCGC
Tag5296:GTTCATCGAG
Tag5297:GTTCATGACT
Tag5298:GTTCATGTGG
Tag5299:GTTCCAACAG
Tag5300:GTTCCAAGTA
Tag5301:GTTCCACCGA
Tag5302:GTTCCACTAT
Tag5303:GTTCCGAATG
Tag5304:GTTCCGACGT
Tag5305:GTTCCGCTTC
Tag5306:GTTCCGTACC
Tag5307:GTTCCTAGAT
Tag5308:GTTCCTCATT
Tag5309:GTTCCTGGTG
Tag5310:GTTCCTTCGG
Tag5311:GTTCGAAGCG
Tag5312:GTTCGACACC
Tag5313:GTTCGAGCTT
Tag5314:GTTCGAGTCA
Tag5315:GTTCGATAAG
Tag5316:GTTCGATTGT
Tag5317:GTTCGCATAC
Tag5318:GTTCGCCAGA
Tag5319:GTTCGCCTTG
Tag5320:GTTCGCTGTA
Tag5321:GTTCGGTCCT
Tag5322:GTTCGTAACA
Tag5323:GTTCTAACTC
Tag5324:GTTCTACGAA
Tag5325:GTTCTAGACG
Tag5326:GTTCTCACGG
Tag5327:GTTCTCATCA
Tag5328:GTTCTCGGTC
Tag5329:GTTCTGCTCG
Tag5330:GTTCTGTAGT
Tag5331:GTTCTGTCTA
Tag5332:GTTCTTCGCC
Tag5333:GTTCTTCTGT
Tag5334:GTTGAACGCA
Tag5335:GTTGAAGTTG
Tag5336:GTTGACAAGT
Tag5337:GTTGACCAAC
Tag5338:GTTGACGTCC
Tag5339:GTTGACTCGA
Tag5340:GTTGAGAGAG
Tag5341:GTTGAGCATG
Tag5342:GTTGAGGCCA
Tag5343:GTTGATACCG
Tag5344:GTTGATATGC
Tag5345:GTTGATCCAT
Tag5346:GTTGCAAGCC
Tag5347:GTTGCAGATC
Tag5348:GTTGCATCAA
Tag5349:GTTGCCATTA
Tag5350:GTTGCCTGAC
Tag5351:GTTGCGCGAA
Tag5352:GTTGCGGAGT
Tag5353:GTTGCGTGCT
Tag5354:GTTGCTACTT
Tag5355:GTTGCTATAG
Tag5356:GTTGCTGGCA
Tag5357:GTTGGAATCT
Tag5358:GTTGGACATA
Tag5359:GTTGGACGGT
Tag5360:GTTGGAGGAC
Tag5361:GTTGGCACCA
Tag5362:GTTGGCTCAG
Tag5363:GTTGGTCTCC
Tag5364:GTTGGTGAGG
Tag5365:GTTGGTTACT
Tag5366:GTTGGTTGAA
Tag5367:GTTGTAACGT
Tag5368:GTTGTACTAC
Tag5369:GTTGTATGGA
Tag5370:GTTGTCAGTG
Tag5371:GTTGTCGACA
Tag5372:GTTGTCGTAT
Tag5373:GTTGTGCAGC
Tag5374:GTTGTGCTTA
Tag5375:GTTGTGGTGG
Tag5376:GTTGTGTAAG
Tag5377:GTTGTTGCTC
Tag5378:TAACAAGTCC
Tag5379:TAACACCGGC
Tag5380:TAACACGACG
Tag5381:TAACACTGTG
Tag5382:TAACAGCAGG
Tag5383:TAACAGCGAT
Tag5384:TAACAGGCAC
Tag5385:TAACCAAGGT
Tag5386:TAACCACCTC
Tag5387:TAACCAGGCG
Tag5388:TAACCGCGGA
Tag5389:TAACCGCTAG
Tag5390:TAACCGGTGC
Tag5391:TAACCTATCC
Tag5392:TAACCTGAAC
Tag5393:TAACCTTGCA
Tag5394:TAACGAATGG
Tag5395:TAACGACACA
Tag5396:TAACGACGTT
Tag5397:TAACGAGAAG
Tag5398:TAACGAGCGC
Tag5399:TAACGCAGTC
Tag5400:TAACGCCTCT
Tag5401:TAACGCTCCG
Tag5402:TAACGGATAC
Tag5403:TAACGGCCTG
Tag5404:TAACGGTAGT
Tag5405:TAACGTCGAG
Tag5406:TAACGTGCTA
Tag5407:TAACTCAGCA
Tag5408:TAACTCCTTC
Tag5409:TAACTCGTGG
Tag5410:TAACTGATCG
Tag5411:TAACTGCTGT
Tag5412:TAACTTCACG
Tag5413:TAACTTGGTC
Tag5414:TAAGAACGCG
Tag5415:TAAGAAGGTC
Tag5416:TAAGACAACC
Tag5417:TAAGACCTAG
Tag5418:TAAGACGCCA
Tag5419:TAAGAGAGCA
Tag5420:TAAGAGGACT
Tag5421:TAAGAGGTGA
Tag5422:TAAGAGTCCG
Tag5423:TAAGATCGGA
Tag5424:TAAGCACTGA
Tag5425:TAAGCATACG
Tag5426:TAAGCCACGC
Tag5427:TAAGCCAGAG
Tag5428:TAAGCCGTCC
Tag5429:TAAGCGAAGT
Tag5430:TAAGCGCAAC
Tag5431:TAAGCGCGTG
Tag5432:TAAGCGGCAT
Tag5433:TAAGCGTTGG
Tag5434:TAAGCTACCA
Tag5435:TAAGCTGCTC
Tag5436:TAAGCTGTAG
Tag5437:TAAGGACCAT
Tag5438:TAAGGAGTTG
Tag5439:TAAGGCACTT
Tag5440:TAAGGCCGGT
Tag5441:TAAGGCGATC
Tag5442:TAAGGCTAGA
Tag5443:TAAGGCTCAC
Tag5444:TAAGGTGACA
Tag5445:TAAGGTTCGT
Tag5446:TAAGGTTGCC
Tag5447:TAAGTACGAC
Tag5448:TAAGTCAAGG
Tag5449:TAAGTCCGTA
Tag5450:TAAGTCTGGC
Tag5451:TAAGTGCCAG
Tag5452:TAAGTGGAGC
Tag5453:TAAGTGTCGA
Tag5454:TAAGTTCTCC
Tag5455:TAATAAGCCG
Tag5456:TAATATCCGC
Tag5457:GTACAACAGC
Tag5458:GTACAACGTT
Tag5459:GTACAATTCG
Tag5460:GTACACCATG
Tag5461:GTACACTAGT
Tag5462:GTACAGACCG
Tag5463:GTACAGCGGA
Tag5464:GTACATCTTC
Tag5465:GTACATGAAG
Tag5466:GTACCAACCA
Tag5467:GTACCAGCAC
Tag5468:GTACCATGTC
Tag5469:GTACCGAAGC
Tag5470:GTACCGGATA
Tag5471:GTACCTAGGA
Tag5472:GTACCTCGAC
Tag5473:GTACCTGGCT
Tag5474:GTACGAGAGA
Tag5475:GTACGATACT
Tag5476:GTACGCATCG
Tag5477:GTACGCTCAA
Tag5478:GTACGTCCTT
Tag5479:GTACTAAGAG
Tag5480:GTACTAGATC
Tag5481:GTACTCCGCT
Tag5482:GTACTCGTGA
Tag5483:GTACTGACGA
Tag5484:GTACTTATCC
Tag5485:GTAGAAGCAT
Tag5486:GTAGACGGAG
Tag5487:GTAGAGACAA
Tag5488:GTAGAGATTG
Tag5489:GTAGAGCTCT
Tag5490:GTAGAGTAGC
Tag5491:GTAGATCCGG
Tag5492:GTAGATGACC
Tag5493:GTAGCACGAT
Tag5494:GTAGCAGGTG
Tag5495:GTAGCATTCT
Tag5496:GTAGCGAGTT
Tag5497:GTAGCGGTAC
Tag5498:GTAGGAACCG
Tag5499:GTAGGATAGG
Tag5500:GTAGGCCGTT
Tag5501:GTAGGCGAAC
Tag5502:GTAGGTCAAT
Tag5503:GTAGGTGCCA
Tag5504:GTAGTACAGT
Tag5505:GTAGTACCTG
Tag5506:GTAGTAGAAG
Tag5507:GTAGTGAGCG
Tag5508:GTAGTGGATT
Tag5509:GTAGTTCATC
Tag5510:GTAGTTCGGA
Tag5511:GTATAACGAC
Tag5512:GTATAAGCGG
Tag5513:GTATAGAGCA
Tag5514:GTATAGCTGC
Tag5515:GTATCATACG
Tag5516:GTATCATGGA
Tag5517:GTATCCTATC
Tag5518:GTATCCTCAG
Tag5519:GTATCTCTTG
Tag5520:GTATCTGAGG
Tag5521:GTATGACCAG
Tag5522:GTATGACTTC
Tag5523:GTATGCAATG
Tag5524:GTATGCAGCT
Tag5525:GTATGCCACA
Tag5526:GTATGGCTAA
Tag5527:GTATGGTGAC
Tag5528:GTATGGTTCG
Tag5529:GTATGTACGC
Tag5530:GTATGTTCCT
Tag5531:GTATTCCGAG
Tag5532:GTATTCGCAT
Tag5533:GTATTCTGCC
Tag5534:GTATTGACAC
Tag5535:GTATTGTCCA
Tag5536:GTATTGTGTG
Tag5537:GTCAACACCA
Tag5538:GTCAACATGT
Tag5539:GTCAACGTAA
Tag5540:GTCAACTCGG
Tag5541:GTCAAGAACT
Tag5542:GTCAAGCGTC
Tag5543:GTCAAGTTCA
Tag5544:GTCAATGCAC
Tag5545:GTCACACTAC
Tag5546:GTCACAGACA
Tag5547:GTCACAGCTT
Tag5548:GTCACCTTAT
Tag5549:GTCACGACTG
Tag5550:GTCACGGTAG
Tag5551:GTCACGTCGA
Tag5552:GTCACTAGCC
Tag5553:GTCACTTAAG
Tag5554:GTCACTTGTT
Tag5555:GTCAGAACGC
Tag5556:GTCAGATAGA
Tag5557:GTCAGCCACT
Tag5558:GTCAGCGATA
Tag5559:GTCAGGAGAC
Tag5560:GTCAGGCATG
Tag5561:GTCAGGCCAA
Tag5562:GTCAGGTACC
Tag5563:GTCAGGTTGG
Tag5564:GTCAGTAGGT
Tag5565:GTCAGTCAGC
Tag5566:GTCAGTTCCG
Tag5567:GTCATACTGA
Tag5568:GTCATCAGTA
Tag5569:GTCATCCAAC
Tag5570:GTCATCGCGT
Tag5571:GTCATCTGGC
Tag5572:GTCATGTGAA
Tag5573:GTCATTACGG
Tag5574:GTCATTGATG
Tag5575:GTCCAACCGT
Tag5576:GTCCAAGACC
Tag5577:GTCCAAGCTG
Tag5578:GTCCACTCTC
Tag5579:GTCCAGTCAA
Tag5580:GTCCAGTGCT
Tag5581:GTCCATATCG
Tag5582:GTCCATTGGA
Tag5583:GTCCGACCTA
Tag5584:GTCCGAGGAA
Tag5585:GTCCGATTAC
Tag5586:GTCCGCACTT
Tag5587:GTCCGCTGAT
Tag5588:GTCCGGATGT
Tag5589:GTCCTAACAT
Tag5590:GTCCTAATGC
Tag5591:GTCCTCCTAA
Tag5592:GTCCTCTACT
Tag5593:GTCCTGAGCA
Tag5594:GTCCTGCATC
Tag5595:GTCCTGGTAC
Tag5596:GTCCTTAGTG
Tag5597:GTCCTTGCCA
Tag5598:GTCGAACGAG
Tag5599:GTCGAACTTC
Tag5600:GTCGAATGGC
Tag5601:GTCGACAGAT
Tag5602:GTCGACTATA
Tag5603:GTCGACTCCT
Tag5604:GTCGAGCTGA
Tag5605:GTCGAGTGTG
Tag5606:GTCGATGATT
Tag5607:GTCGCAACTA
Tag5608:GTCGCATTAG
Tag5609:GTCGCGATCT
Tag5610:GTCGGATGCA
Tag5611:GTCGGTAGTC
Tag5612:GTCGGTTCAC
Tag5613:GTCGTAAGAA
Tag5614:GTCGTAGACT
Tag5615:GTCGTCTTAC
Tag5616:GTCGTGCAAT
Tag5617:GTCGTGGAGA
Tag5618:GTCGTTACCT
Tag5619:GTCGTTGTGT
Tag5620:GTCTAAGGCT
Tag5621:GTCTACCGCA
Tag5622:GTCTACTGGT
Tag5623:GTCTATAAGG
Tag5624:GTCTATGTAG
Tag5625:GTCTCAATGA
Tag5626:GTCTCACAGC
Tag5627:GTCTCAGTCG
Tag5628:GTCTCCGAGA
Tag5629:GTCTCCTTGC
Tag5630:GTCTCGCTCA
Tag5631:GTCTGAATAG
Tag5632:GTCTGAGCTC
Tag5633:GTCTGATCGT
Tag5634:GTCTGCAGAA
Tag5635:GTCTGCGTTG
Tag5636:GTCTGGAGTG
Tag5637:GTCTGTACCA
Tag5638:GTCTGTCAAG
Tag5639:GTCTTATCAG
Tag5640:GTCTTCAACC
Tag5641:GTCTTCACTG
Tag5642:GTCTTCCATT
Tag5643:GTCTTCTCGA
Tag5644:GTGAACAAGA
Tag5645:GTGAACAGCG
Tag5646:GTGAACCTCC
Tag5647:GTGAACGACT
Tag5648:GTGAAGACAC
Tag5649:GTGAAGGCTG
Tag5650:GTGAATAACC
Tag5651:GTGAATACGT
Tag5652:GTGAATCCAA
Tag5653:GTGAATGGTT
Tag5654:GTGAATTGAC
Tag5655:GTGACAACAA
Tag5656:GTGACACGTC
Tag5657:GTGACATTGT
Tag5658:GTGACCAATT
Tag5659:GTGACCATAG
Tag5660:GTGACGATGC
Tag5661:GTGACGCACA
Tag5662:GTGACGCGAT
Tag5663:GTGACTGTAA
Tag5664:GTGACTTCCA
Tag5665:GTGAGAATCG
Tag5666:GTGAGACCGA
Tag5667:GTGAGAGTAT
Tag5668:GTGAGCGCTT
Tag5669:GTGAGCTGTC
Tag5670:GTGAGGATAA
Tag5671:GTGAGTATTC
Tag5672:GTGAGTGCAG
Tag5673:GTGAGTTATG
Tag5674:GTGAGTTCGC
Tag5675:GTGATAAGCT
Tag5676:GTGATACCAC
Tag5677:GTGATAGAGG
Tag5678:GTGATCCTTA
Tag5679:GTGATCGGAC
Tag5680:GTGATCTCCG
Tag5681:GTGATGGCGA
Tag5682:GTGATTCACT
Tag5683:GTGATTCTAG
Tag5684:GTGCAAGGAC
Tag5685:GTGCAATACA
Tag5686:GTGCAATCTT
Tag5687:GTGCACATGG
Tag5688:GTGCAGATTA
Tag5689:GTGCAGCTAC
Tag5690:GTGCAGTAAT
Tag5691:GTGCATAGTC
Tag5692:GTGCCAAGGT
Tag5693:GTGCCACAAC
Tag5694:GTGCCAGTTC
Tag5695:GTGCCATGAA
Tag5696:GTGCCGTTAG
Tag5697:GTGCCTAATA
Tag5698:GTGCCTCTGA
Tag5699:GTGCGGCATT
Tag5700:GTGCGTCGTA
Tag5701:GTGCTAGGTA
Tag5702:GTGCTATCGA
Tag5703:GTGCTCTAGG
Tag5704:GTGCTGAACT
Tag5705:GTGCTGTCAC
Tag5706:GTGCTTGAGA
Tag5707:GTGCTTGTAT
Tag5708:GTGGAACAAT
Tag5709:GTGGAAGAGC
Tag5710:GTGGAATGTA
Tag5711:GTGGACCTTG
Tag5712:GTGGACGTGA
Tag5713:GTGGACTACC
Tag5714:GTGGAGGTAG
Tag5715:GTGGAGTCGT
Tag5716:GTGGATCACG
Tag5717:GTGGATCCTC
Tag5718:GTGGCACAGA
Tag5719:GTGGCGGTTA
Tag5720:GTGGCTAAGT
Tag5721:GTGGCTCTAC
Tag5722:GTGGTAATGG
Tag5723:GTGGTATCAT
Tag5724:GTGGTCCAAG
Tag5725:GTGGTGACTG
Tag5726:GTGGTGAGAC
Tag5727:GTGGTGTTCA
Tag5728:GTGTAACCGC
Tag5729:GTGTAATGCC
Tag5730:GTGTACACTA
Tag5731:GTGTACCGTT
Tag5732:GTGTACGTCG
Tag5733:GTGTAGATGT
Tag5734:GTGTAGCCAT
Tag5735:GTGTAGGTTC
Tag5736:GTGTCCGCAA
Tag5737:GTGTCCTTCT
Tag5738:GTGTCGAATC
Tag5739:GTGTCTACAG
Tag5740:GTGTCTGACC
Tag5741:GTGTCTGGAT
Tag5742:GTGTGAGTGC
Tag5743:GTGTGCCTGT
Tag5744:GTGTGGTGTA
Tag5745:GTGTGTTGCG
Tag5746:GTGTTACGCA
Tag5747:GTGTTATCTC
Tag5748:GTGTTCCTAC
Tag5749:GTGTTCTGAA
Tag5750:GTGTTGAAGG
Tag5751:GTTAACCGGA
Tag5752:GTTAAGAGCC
Tag5753:GTTAAGGACG
Tag5754:GTTAAGGTGC
Tag5755:GTTAATCCTG
Tag5756:GTTAATTGCG
Tag5757:GTTACTGGAC
Tag5758:GTTAGAACTG
Tag5759:GTTAGATTCC
Tag5760:GTTAGCCTAA
Tag5761:GTTAGTCGTC
Tag5762:GTTAGTGCCT
Tag5763:GTTATATCGG
Tag5764:GTTATGCGTG
Tag5765:GTTATTAGGC
Tag5766:TAGCCGTACA
Tag5767:TAGCCTAAGA
Tag5768:TAGCCTAGCG
Tag5769:TAGCCTCATG
Tag5770:TAGCCTCTAA
Tag5771:TAGCCTGCCA
Tag5772:TAGCCTGTGG
Tag5773:TAGCGAACCA
Tag5774:TAGCGACGGA
Tag5775:TAGCGACTAG
Tag5776:TAGCGAGGCT
Tag5777:TAGCGATCAT
Tag5778:TAGCGCAATA
Tag5779:TAGCGCCAGT
Tag5780:TAGCGCTCGA
Tag5781:TAGCGGAAGC
Tag5782:TAGCGGAGTG
Tag5783:TAGCGGTTCG
Tag5784:TAGCGTCCAC
Tag5785:TAGCGTGAAT
Tag5786:TAGCGTTATC
Tag5787:TAGCTAACGT
Tag5788:TAGCTAATCC
Tag5789:TAGCTAGAGC
Tag5790:TAGCTAGGAA
Tag5791:TAGCTCGCAG
Tag5792:TAGCTCTACT
Tag5793:TAGCTCTGTC
Tag5794:TAGCTGCGAC
Tag5795:TAGCTGTCTG
Tag5796:TAGCTTCCGG
Tag5797:TAGCTTCGTA
Tag5798:TAGGAACACC
Tag5799:TAGGAACGAT
Tag5800:TAGGAAGCGG
Tag5801:TAGGAATGCA
Tag5802:TAGGACAGCT
Tag5803:TAGGACATGG
Tag5804:TAGGACCGTC
Tag5805:TAGGACGTAA
Tag5806:TAGGAGACGC
Tag5807:TAGGAGAGAG
Tag5808:TAGGAGCATA
Tag5809:TAGGAGGTTC
Tag5810:TAGGAGTGGT
Tag5811:TAGGATCCTT
Tag5812:TAGGATCTCA
Tag5813:TAGGCACCAG
Tag5814:TAGGCAGAGT
Tag5815:TAGGCATTCC
Tag5816:TAGGCCAACA
Tag5817:TAGGCCGCTA
Tag5818:TAGGCCTATC
Tag5819:TAGGCCTCCT
Tag5820:TAGGCCTTAG
Tag5821:TAGGCGAATG
Tag5822:TAGGCGCGAA
Tag5823:TAGGCTGACC
Tag5824:TAGGCTGGTG
Tag5825:TAGGTAAGTC
Tag5826:TAGGTATCAC
Tag5827:TAGGTCCAGA
Tag5828:TAGGTCGTTG
Tag5829:TAGGTCTCGG
Tag5830:TAGGTGATCT
Tag5831:TAGGTGCTGC
Tag5832:TAGGTGGACG
Tag5833:TAGGTTCAAG
Tag5834:TAGGTTGGCA
Tag5835:TAGTAACCGA
Tag5836:TAGTACACAG
Tag5837:TAGTACAGGC
Tag5838:TAGTACCAAC
Tag5839:TAGTACGCGT
Tag5840:TAGTAGCACT
Tag5841:TAGTAGGCTG
Tag5842:TAGTAGTAGG
Tag5843:TAGTATCGCC
Tag5844:TAGTCAACGC
Tag5845:TAGTCACGTT
Tag5846:TAGTCAGGAG
Tag5847:TAGTCATCCG
Tag5848:TAGTCCATCT
Tag5849:TAGTCCGACG
Tag5850:TAGTCCTGGT
Tag5851:TAGTCGACAA
Tag5852:TAGTCGAGTC
Tag5853:TAGTCGCTAT
Tag5854:TAGTCGGTGA
Tag5855:TAGTCGTAAC
Tag5856:TAGTGAATCG
Tag5857:TAGTGAGACA
Tag5858:TAGTGATAGC
Tag5859:TAGTGATGTG
Tag5860:TAGTGCGTCC
Tag5861:TAGTGGAGGT
Tag5862:TAGTGGCCTC
Tag5863:TAGTGTGCGG
Tag5864:TAGTGTTACG
Tag5865:TAGTTCAGTG
Tag5866:TAGTTCCGCA
Tag5867:TAGTTGGTAC
Tag5868:TATAACAGCC
Tag5869:TATAACCGGT
Tag5870:TATAACGAGG
Tag5871:TATAACTCCG
Tag5872:TATAAGGCTC
Tag5873:TATAAGTGGC
Tag5874:TATACAACCG
Tag5875:TATACCAGGA
Tag5876:TATACCGCAC
Tag5877:TATACCTCGT
Tag5878:TATACGATGC
Tag5879:TATACGGTCA
Tag5880:TATAGAGACG
Tag5881:TATAGCATGG
Tag5882:TATAGGACAC
Tag5883:TATAGGCCGA
Tag5884:TATAGGCGCC
Tag5885:TATAGGTCCT
Tag5886:TATAGTTCGG
Tag5887:TATATGACGG
Tag5888:TATCACCGCG
Tag5889:TATCACTCTC
Tag5890:TATCAGACCT
Tag5891:TATCAGCCAA
Tag5892:TATCAGTGCA
Tag5893:TATCATAGGC
Tag5894:TATCATGTCG
Tag5895:TATCCAACGA
Tag5896:TATCCACAGC
Tag5897:TATCCAGTTC
Tag5898:TATCCGAGAG
Tag5899:TATCCGCGTC
Tag5900:TATCCGGCTG
Tag5901:TATCCTCACA
Tag5902:TATCCTTCGC
Tag5903:TATCGATTCC
Tag5904:TATCGCCTGC
Tag5905:TATCGCGACA
Tag5906:TATCGGCACG
Tag5907:TATCGTACCG
Tag5908:TATCGTTGTG
Tag5909:TATCTCGCTA
Tag5910:TATCTCTAGG
Tag5911:TATCTGAGCC
Tag5912:TATCTGGTCT
Tag5913:TATCTGTCAC
Tag5914:TATGAACCGC
Tag5915:TATGACACGT
Tag5916:TATGACCTCC
Tag5917:TATGACGGTG
Tag5918:TATGATGCAG
Tag5919:TATGCAACTC
Tag5920:TATGCCATTG
Tag5921:TATGCCGGCA
Tag5922:TATGCGCTGT
Tag5923:TATGCGTAGC
Tag5924:TATGCTCGAT
Tag5925:TATGCTGAGA
Tag5926:TATGGAAGTG
Tag5927:TATGGAGTCT
Tag5928:TATGGCAAGC
Tag5929:TATGGCATCA
Tag5930:TATGGTAGGA
Tag5931:TATGGTGATG
Tag5932:TATGGTTCTC
Tag5933:TATGTACTGG
Tag5934:TATGTCGACC
Tag5935:TATGTGCGCT
Tag5936:TATGTGTGTC
Tag5937:TATGTTCAGC
Tag5938:TATTACGGAC
Tag5939:TATTAGCAGC
Tag5940:TATTCAGCGT
Tag5941:TATTCCGTGC
Tag5942:TATTCGCCAG
Tag5943:TATTCTGGCG
Tag5944:TAATCCGGAA
Tag5945:TAATCCTCTG
Tag5946:TAATCGCGCC
Tag5947:TAATCGTCCT
Tag5948:TAATCTACGG
Tag5949:TAATGAGGCC
Tag5950:TAATGGAGAG
Tag5951:TAATGGCTGC
Tag5952:TAATGTGGTG
Tag5953:TACAAGAGAC
Tag5954:TACAATCACC
Tag5955:TACAATCTGG
Tag5956:TACACACTAG
Tag5957:TACACATCGC
Tag5958:TACACCTCTA
Tag5959:TACACGAAGA
Tag5960:TACACGCGCA
Tag5961:TACACGGACC
Tag5962:TACACGTGTC
Tag5963:TACACTCGGT
Tag5964:TACAGAGCAA
Tag5965:TACAGCCTTG
Tag5966:TACAGCGCCT
Tag5967:TACAGGAACT
Tag5968:TACAGGATAG
Tag5969:TACAGGTGCG
Tag5970:TACAGGTTGA
Tag5971:TACAGTACGT
Tag5972:TACATACCAC
Tag5973:TACATAGCGG
Tag5974:TACATCAACG
Tag5975:TACATCCGAG
Tag5976:TACATCGATC
Tag5977:TACATGCATG
Tag5978:TACATGCCGT
Tag5979:TACATTGTCC
Tag5980:TACCAAGCTA
Tag5981:TACCAAGGAG
Tag5982:TACCAATTGC
Tag5983:TACCACAAGT
Tag5984:TACCACATAC
Tag5985:TACCACGGCT
Tag5986:TACCAGAACG
Tag5987:TACCAGGTAT
Tag5988:TACCATTCTG
Tag5989:TACCATTGGT
Tag5990:TACCGACAGG
Tag5991:TACCGAGTGT
Tag5992:TACCGATGAC
Tag5993:TACCGCACAT
Tag5994:TACCGCGATG
Tag5995:TACCGCTACC
Tag5996:TACCGGAGCA
Tag5997:TACCTAAGTG
Tag5998:TACCTAGACT
Tag5999:TACCTCCAGC
Tag6000:TACCTCTCCA
Tag6001:TACCTGGCAA
Tag6002:TACCTGGTTG
Tag6003:TACCTTATGC
Tag6004:TACGAACAAG
Tag6005:TACGAATCGA
Tag6006:TACGACGAAC
Tag6007:TACGACTGCG
Tag6008:TACGAGTACA
Tag6009:TACGATAAGC
Tag6010:TACGATGGAT
Tag6011:TACGCAACGG
Tag6012:TACGCAAGCC
Tag6013:TACGCCTAAT
Tag6014:TACGCGATAA
Tag6015:TACGCTACTT
Tag6016:TACGCTGTGT
Tag6017:TACGCTTCAG
Tag6018:TACGGACATT
Tag6019:TACGGACTCC
Tag6020:TACGGATCTG
Tag6021:TACGGCAGAA
Tag6022:TACGGCGGTT
Tag6023:TACGGCGTGA
Tag6024:TACGGCTTCT
Tag6025:TACGGTATTC
Tag6026:TACGGTCGAC
Tag6027:TACGTACGCA
Tag6028:TACGTAGATG
Tag6029:TACGTATACC
Tag6030:TACGTCCTCG
Tag6031:TACGTGTGAG
Tag6032:TACGTTAGCG
Tag6033:TACGTTGCCT
Tag6034:TACTACCGTT
Tag6035:TACTACGTAG
Tag6036:TACTAGAGGA
Tag6037:TACTAGCTTC
Tag6038:TACTAGTCGC
Tag6039:TACTAGTGTG
Tag6040:TACTCACCAT
Tag6041:TACTCAGCTG
Tag6042:TACTCCAACC
Tag6043:TACTCGATTG
Tag6044:TACTCGCCGA
Tag6045:TACTCGGAAG
Tag6046:TACTCTTCTC
Tag6047:TACTGACCTA
Tag6048:TACTGCCACT
Tag6049:TACTGCTGGC
Tag6050:TACTGTCAGA
Tag6051:TACTGTGCAT
Tag6052:TACTTCACAC
Tag6053:TACTTCGAGG
Tag6054:TACTTCGGAT
Tag6055:TACTTGAAGC
Tag6056:TACTTGCTCA
Tag6057:TACTTGTGGT
Tag6058:TAGAACTAGC
Tag6059:TAGAAGATCG
Tag6060:TAGAAGCGTT
Tag6061:TAGAATGCGC
Tag6062:TAGACACGCC
Tag6063:TAGACCGGCT
Tag6064:TAGACGAGAT
Tag6065:TAGACGCACG
Tag6066:TAGACTTAGG
Tag6067:TAGAGACATC
Tag6068:TAGAGAGTAC
Tag6069:TAGAGCTATG
Tag6070:TAGAGCTGCA
Tag6071:TAGAGGCTTA
Tag6072:TAGAGTGAGA
Tag6073:TAGATAGCTC
Tag6074:TAGATCATGC
Tag6075:TAGATCCACC
Tag6076:TAGATCTTCG
Tag6077:TAGCAAGTTG
Tag6078:TAGCACACTT
Tag6079:TAGCACCGAA
Tag6080:TAGCAGCTCC
Tag6081:TATTGACGCA
Tag6082:TATTGCCTCG
Tag6083:TATTGCGAAG
Tag6084:TATTGGACTG
Tag6085:TATTGGTTGG
Tag6086:TATTGTCGGC
Tag6087:TCAACAGTTG
Tag6088:TCAACCGCCA
Tag6089:TCAACCGGTT
Tag6090:TCAACCTGGA
Tag6091:TCAACGACCG
Tag6092:TCAACGCACT
Tag6093:TCAACGCGTA
Tag6094:TCAAGAAGGA
Tag6095:TCAAGAGCAT
Tag6096:TCAAGATACC
Tag6097:TCAAGCACGG
Tag6098:TCAAGCCAGT
Tag6099:TCAAGCCGAA
Tag6100:TCAAGGATCT
Tag6101:TCAAGTCGCC
Tag6102:TCAAGTGGTA
Tag6103:TCAAGTTCCT
Tag6104:TCAATACGTG
Tag6105:TCAATCAGAG
Tag6106:TCAATCTAGC
Tag6107:TCAATGAGGT
Tag6108:TCAATGCCTC
Tag6109:TCAATGGCGG
Tag6110:TCAATTCCGA
Tag6111:TCAATTGTCG
Tag6112:TCACAACGAG
Tag6113:TCACAACTCA
Tag6114:TCACACAATC
Tag6115:TCACACGGAT
Tag6116:TCACACTCTT
Tag6117:TCACAGCTGC
Tag6118:TCACAGGCCA
Tag6119:TCACAGTGAA
Tag6120:TCACATCCAA
Tag6121:TCACATGTAC
Tag6122:TCACATTGCT
Tag6123:TCACCAGGAC
Tag6124:TCACCATAAG
Tag6125:TCACCGAACC
Tag6126:TCACCGTATA
Tag6127:TCACCGTCAC
Tag6128:TCACCGTGGT
Tag6129:TCACCTCAAT
Tag6130:TCACCTCTCG
Tag6131:TCACCTTGTG
Tag6132:TCACGAACGT
Tag6133:TCACGACCAC
Tag6134:TCACGAGATA
Tag6135:TCACGATTCG
Tag6136:TCACGCCATG
Tag6137:TCACGCTACA
Tag6138:TCACGCTGAG
Tag6139:TCACGGACAG
Tag6140:TCACGTGTTG
Tag6141:TCACTACAGA
Tag6142:TCACTATCGG
Tag6143:TCACTCTGCC
Tag6144:TCACTGAGTC
Tag6145:TCACTGGACT
Tag6146:TCACTGGTTA
Tag6147:TCACTTCGCA
Tag6148:TCAGAACCTG
Tag6149:TCAGACATAC
Tag6150:TCAGACGTCG
Tag6151:TCAGACTGGT
Tag6152:TCAGAGAATG
Tag6153:TCAGATGATC
Tag6154:TCAGATGCGA
Tag6155:TCAGATTCAC
Tag6156:TCAGCAACAC
Tag6157:TCAGCAAGCT
Tag6158:TCAGCACCGT
Tag6159:TCAGCAGAGG
Tag6160:TCAGCATCTA
Tag6161:TCAGCCTTCT
Tag6162:TCAGCGGTGT
Tag6163:TCAGCTACTG
Tag6164:TCAGCTGTCA
Tag6165:TCAGGAGTCC
Tag6166:TCAGGCTAAT
Tag6167:TCAGGTAGGC
Tag6168:TCAGTAGCAG
Tag6169:TCAGTCATGT
Tag6170:TCAGTCGAGA
Tag6171:TCAGTCGGCT
Tag6172:TCAGTCTCCA
Tag6173:TCAGTGCTCG
Tag6174:TCAGTGTAAG
Tag6175:TCAGTTCGAT
Tag6176:TCATAACGGC
Tag6177:TCATACACTG
Tag6178:TCATACCAAG
Tag6179:TCATACTGTC
Tag6180:TCATAGAGCC
Tag6181:TCATATGGCA
Tag6182:TCATCAAGTC
Tag6183:TCATCACGCA
Tag6184:TCATCCATCC
Tag6185:TCATCCGTGA
Tag6186:TCATCCTTAG
Tag6187:TCATCGAAGG
Tag6188:TCATCGACTA
Tag6189:TCATCGGAAT
Tag6190:TCATCTCTAC
Tag6191:TCATCTGCAG
Tag6192:TCATGACCGG
Tag6193:TCATGAGGAG
Tag6194:TCATGATCTC
Tag6195:TCATGCAAGA
Tag6196:TCATGCTGCT
Tag6197:TCATGGCGTT
Tag6198:TCATGGTACG
Tag6199:TCATGTTGAC
Tag6200:TCATTAGCGA
Tag6201:TCATTCAGGC
Tag6202:TCATTGCACC
Tag6203:TCCAACAACT
Tag6204:TCCAACCAGA
Tag6205:TCCAACCTAT
Tag6206:TCCAACGGTG
Tag6207:TCCAACTGAA
Tag6208:TCCAAGCATT
Tag6209:TCCAAGCTCC
Tag6210:TCCAAGGTAA
Tag6211:TCCAAGTTGT
Tag6212:TCCAATAGGA
Tag6213:TCCAATCCGC
Tag6214:TCCAATGCCA
Tag6215:TCCACAACAA
Tag6216:TCCACACACG
Tag6217:TCCACACGTC
Tag6218:TCCACAGAGA
Tag6219:TCCACCATTG
Tag6220:TCCACGATCA
Tag6221:TCCACGCAAC
Tag6222:TCCACGGTTC
Tag6223:TCCACTAACC
Tag6224:TCCACTGCGT
Tag6225:TCCACTGGAG
Tag6226:TCCAGAAGAC
Tag6227:TCCAGAATGT
Tag6228:TCCAGACGCA
Tag6229:TCCAGATCGG
Tag6230:TCCAGCGAAG
Tag6231:TCCAGCTCAT
Tag6232:TCCAGGACTA
Tag6233:TCCAGTCCAG
Tag6234:TCCAGTGTGA
Tag6235:TCCAGTTACA
Tag6236:TCCAGTTCTC
Tag6237:TCCATAGGCG
Tag6238:TCCATCCGTT
Tag6239:TCCATCTATG
Tag6240:TCCATCTTCA
Tag6241:TCCATGAATC
Tag6242:TCCATGCTGG
Tag6243:TCCATGGCAC
Tag6244:TCCATGTCTT
Tag6245:TCCATTGAGC
Tag6246:TCCGAACAGC
Tag6247:TCCGAAGCCT
Tag6248:TCCGAAGTGG
Tag6249:TCCGAATACG
Tag6250:TCCGACAGTT
Tag6251:TCCGACTTCC
Tag6252:TCCGAGATGC
Tag6253:TCCGAGCCAA
Tag6254:TCCGATACTC
Tag6255:TCCGATCGTA
Tag6256:TCCGCAAGAG
Tag6257:TCCGCACTAC
Tag6258:TCCGCATGGT
Tag6259:TCCGCCAATC
Tag6260:TCCGCCGTTA
Tag6261:TCCGCCTAGA
Tag6262:TCCGCGAGTA
Tag6263:TCCGCTATCT
Tag6264:TCCGGAGAAC
Tag6265:TCCGGCTGTA
Tag6266:TCCGGTCCTT
Tag6267:TCCGGTTAGC
Tag6268:TCCGTAACCG
Tag6269:TCCGTACTTG
Tag6270:TCCGTAGGTA
Tag6271:TCCGTCAGAC
Tag6272:TCCGTGAAGG
Tag6273:TCCGTGGTCT
Tag6274:TCCGTTATAG
Tag6275:TCCGTTCAGT
Tag6276:TCCGTTCCAC
Tag6277:TCCTAAGCAC
Tag6278:TCCTAATCTG
Tag6279:TCCTACAGCG
Tag6280:TCCTACGATT
Tag6281:TCCTACGTGC
Tag6282:TCCTACTCCT
Tag6283:TCCTAGTATC
Tag6284:TCCTATGTTG
Tag6285:TCCTATTAGG
Tag6286:TCCTCAGCCA
Tag6287:TCCTCATACC
Tag6288:TCCTCCACAG
Tag6289:TCCTCCATGT
Tag6290:TCCTCGGATA
Tag6291:TCCTCGTTCG
Tag6292:TCCTCTCGAA
Tag6293:TCCTCTTGCT
Tag6294:TCCTGAACTT
Tag6295:TCCTGACAAT
Tag6296:TCCTGACTGA
Tag6297:TCCTGATGCG
Tag6298:TCCTGCATAA
Tag6299:TCCTGGAACA
Tag6300:TCCTGGATTC
Tag6301:TCCTGGCATG
Tag6302:TCCTGTACAC
Tag6303:TCCTGTCGTC
Tag6304:TCCTGTGAGT
Tag6305:TCCTGTGCTA
Tag6306:TCCTTAATGG
Tag6307:TCCTTACCGC
Tag6308:TCCTTCACTA
Tag6309:TCCTTCGACC
Tag6310:TCCTTCGCGT
Tag6311:TCCTTCTTAC
Tag6312:TCCTTGTCGG
Tag6313:TCGAACACGA
Tag6314:TCGAACGTCC
Tag6315:TCGAAGCGGA
Tag6316:TCGAAGCTTG
Tag6317:TCGAAGGAGT
Tag6318:TCGAATAGTC
Tag6319:TCGAATCACT
Tag6320:TCGAATGCAG
Tag6321:TCGAATTCGT
Tag6322:TCGACAAGGC
Tag6323:TCGACAGACC
Tag6324:TCGACATCTC
Tag6325:TCGACCAGCA
Tag6326:TCGACGAGTG
Tag6327:TCGACGGCAA
Tag6328:TCGACGTTGG
Tag6329:TCGACTACAT
Tag6330:TCGACTCGAC
Tag6331:TCGACTCTGT
Tag6332:TCGAGAGGTT
Tag6333:TCGAGCAATC
Tag6334:TCGAGCATAG
Tag6335:TCGAGCGTTA
Tag6336:TCGAGGAACG
Tag6337:TCGAGGCCTT
Tag6338:TCGAGGTAGA
Tag6339:TCGAGGTTCC
Tag6340:TCGAGTACGC
Tag6341:TCGAGTGTAT
Tag6342:TCGATAACAC
Tag6343:TCGATAGTGA
Tag6344:TCGATATCCA
Tag6345:TCGATCCAGG
Tag6346:TCGATGCTAA
Tag6347:TCGATTCGCG
Tag6348:TCGATTGCTT
Tag6349:TCGCACAGGT
Tag6350:TCGCACCTAG
Tag6351:TCGCACGTGA
Tag6352:TCGCACTCCA
Tag6353:TCGCAGATAC
Tag6354:TCGCAGGATG
Tag6355:TCGCATACCG
Tag6356:TCGCATCAAC
Tag6357:TCGCATGACA
Tag6358:TCGCCAATGG
Tag6359:TCGCCACTTC
Tag6360:TCGCCAGTAT
Tag6361:TCGCCATAGC
Tag6362:TCGCCTGGTT
Tag6363:TCGCCTTCGA
Tag6364:TCGCGAAGAA
Tag6365:TCGCGACACT
Tag6366:TCGCGATGTC
Tag6367:TCGCGCTTAC
Tag6368:TCGCGGATCA
Tag6369:TCGCGTAGCT
Tag6370:TCGCGTCCTA
Tag6371:TCGCTAAGTT
Tag6372:TCGCTATATG
Tag6373:TCGCTCCAAT
Tag6374:TCGCTCGTCT
Tag6375:TCGCTCTGGA
Tag6376:TCGCTGAGAG
Tag6377:TCGCTTAAGC
Tag6378:TCGCTTGCAC
Tag6379:TCGGAACTCG
Tag6380:TCGGACAACG
Tag6381:TCGGACGGTA
Tag6382:TCGGAGACCT
Tag6383:TCGGAGTAAT
Tag6384:TCGGATGAGG
Tag6385:TCGGATGGCT
Tag6386:TCGGATTCTA
Tag6387:TCGGCAGCTT
Tag6388:TCGGCCAAGT
Tag6389:TCGGCTATGA
Tag6390:TCGGTAACGA
Tag6391:TCGGTACCTC
Tag6392:TCGGTATAGT
Tag6393:TCGGTCACAG
Tag6394:TCGGTCTGTT
Tag6395:TCGGTCTTGC
Tag6396:TCGGTGAATA
Tag6397:TCGGTGGAAC
Tag6398:TCGGTGTGCA
Tag6399:TCGGTTCTGG
Tag6400:TCGGTTGGAG
Tag6401:TCGTATCGGT
Tag6402:TCGTATCTTC
Tag6403:TCGTCAGTGC
Tag6404:TCGTCATTCT
Tag6405:TCGTCCGCAT
Tag6406:TCGTCCGTTG
Tag6407:TCGTCCTATA
Tag6408:TCGTCCTGAC
Tag6409:TCGTCTCACG
Tag6410:TCGTCTGCTC
Tag6411:TCGTGACGAC
Tag6412:TCGTGATCAG
Tag6413:TCGTGCACCT
Tag6414:TCGTGCCACA
Tag6415:TCGTGCTTGG
Tag6416:TCGTGGAATT
Tag6417:TCGTGGCTAG
Tag6418:TCGTGGTGAT
Tag6419:TCGTGTCCAT
Tag6420:TCGTGTGACC
Tag6421:TTGGATTGTC
Tag6422:TTGGCAACCG
Tag6423:TTGGCAAGAA
Tag6424:TTGGCACACT
Tag6425:TTGGCACTTA
Tag6426:TTGGCAGATG
Tag6427:TTGGCATCGC
Tag6428:TTGGCCACGA
Tag6429:TTGGCCAGTT
Tag6430:TTGGCCATAC
Tag6431:TTGGCCGAAT
Tag6432:TTGGCCGTCA
Tag6433:TTGGCGCTAG
Tag6434:TTGGCGGAGA
Tag6435:TTGGCGTTCT
Tag6436:TTGGCTAGGC
Tag6437:TTGGCTCCAA
Tag6438:TTGGCTGCGT
Tag6439:TTGGCTTAAG
Tag6440:TTGGCTTGCA
Tag6441:TTGGTACAGC
Tag6442:TTGGTACGTG
Tag6443:TTGGTAGCCT
Tag6444:TTGGTCAATC
Tag6445:TTGGTCCGAC
Tag6446:TTGGTCTACA
Tag6447:TTGGTGCATT
Tag6448:TTGGTGCGGA
Tag6449:TTGGTGGCAG
Tag6450:TTGGTGTCTA
Tag6451:TTGGTGTGAT
Tag6452:TTGGTTATCC
Tag6453:TTGTAACGAG
Tag6454:TTGTAAGCTC
Tag6455:TTGTACAACC
Tag6456:TTGTACCAGG
Tag6457:TTGTACGGCT
Tag6458:TTGTACTCGC
Tag6459:TTGTAGAGTG
Tag6460:TTGTAGGACA
Tag6461:TTGTAGTCAG
Tag6462:TTGTAGTTCC
Tag6463:TTGTATCCAC
Tag6464:TTGTCACGGA
Tag6465:TTGTCCACTC
Tag6466:TTGTCCTCCA
Tag6467:TTGTCGAACG
Tag6468:TTGTCGCAGT
Tag6469:TTGTCGCCTG
Tag6470:TTGTCGGCAC
Tag6471:TTGTCGTGGC
Tag6472:TTGTCTCTCT
Tag6473:TTGTCTGTAG
Tag6474:TTGTGAAGGC
Tag6475:TTGTGACCAA
Tag6476:TTGTGAGAAG
Tag6477:TTGTGATCCT
Tag6478:TTGTGCGGTG
Tag6479:TTGTGCTAAC
Tag6480:TTGTGGACGG
Tag6481:TTGTGGATAC
Tag6482:TTGTGGCGCA
Tag6483:TTGTGGTATG
Tag6484:TTGTGTCGTT
Tag6485:TTGTGTCTGC
Tag6486:TTGTGTTCGA
Tag6487:TTGTTACCGT
Tag6488:TTGTTAGTGG
Tag6489:TTGTTCAGGT
Tag6490:TTGTTCCTTG
Tag6491:TTGTTCGAGA
Tag6492:TTGTTGAGCC
Tag6493:TGTGAAGCTA
Tag6494:TGTGAAGGAG
Tag6495:TGTGAATTGG
Tag6496:TGTGACATGA
Tag6497:TGTGACCAGT
Tag6498:TGTGACGTAT
Tag6499:TGTGACTACA
Tag6500:TGTGAGACTG
Tag6501:TGTGAGAGCC
Tag6502:TGTGAGCGAA
Tag6503:TGTGAGTGTT
Tag6504:TGTGATCGCG
Tag6505:TGTGCAACCA
Tag6506:TGTGCACGGT
Tag6507:TGTGCATACT
Tag6508:TGTGCCACTT
Tag6509:TGTGCCTAAG
Tag6510:TGTGCCTGGA
Tag6511:TGTGCCTTCC
Tag6512:TGTGCGAGAT
Tag6513:TGTGCGCATC
Tag6514:TGTGCGGACA
Tag6515:TGTGCTACGC
Tag6516:TGTGCTCCTA
Tag6517:TGTGCTGTCG
Tag6518:TGTGCTTGAC
Tag6519:TGTGGAATAG
Tag6520:TGTGGACCAC
Tag6521:TGTGGAGAGG
Tag6522:TGTGGATGGC
Tag6523:TGTGGCAGCT
Tag6524:TGTGGCGATT
Tag6525:TGTGGCTCTG
Tag6526:TGTGGTAACG
Tag6527:TGTGGTACAA
Tag6528:TGTGTACCGA
Tag6529:TGTGTACTCT
Tag6530:TGTGTAGTAC
Tag6531:TGTGTCAATG
Tag6532:TGTGTCAGGC
Tag6533:TGTGTCCAAC
Tag6534:TGTGTCGTCA
Tag6535:TGTGTGCACG
Tag6536:TGTGTGTAGT
Tag6537:TGTGTTGCAT
Tag6538:TGTGTTGGTA
Tag6539:TGTTAACCAG
Tag6540:TGTTAACTGC
Tag6541:TGTTAAGTCG
Tag6542:TGTTACACCT
Tag6543:TGTTACAGAG
Tag6544:TGTTACCTCA
Tag6545:TGTTACGGTT
Tag6546:TGTTAGAGGT
Tag6547:TGTTAGGAAC
Tag6548:TGTTATGGCC
Tag6549:TGTTATTCCG
Tag6550:TGTTCACACG
Tag6551:TGTTCAGCAA
Tag6552:TGTTCATCTG
Tag6553:TGTTCCATGG
Tag6554:TGTTCCGATA
Tag6555:TGTTCCTCGC
Tag6556:TGTTCGCGAC
Tag6557:TGTTCGCTCT
Tag6558:TGTTCGTAGG
Tag6559:TGTTCTAGCT
Tag6560:TGTTCTCAGA
Tag6561:TGTTCTCTTC
Tag6562:TGTTCTTACC
Tag6563:TGTTGACATC
Tag6564:TGTTGATGAG
Tag6565:TGTTGCACTA
Tag6566:TGTTGCGCGT
Tag6567:TGTTGGAGCG
Tag6568:TGTTGGTCCA
Tag6569:TGTTGGTGTC
Tag6570:TGTTGTATCC
Tag6571:TGTTGTCCGG
Tag6572:TGTTGTGACT
Tag6573:TTAACACGCT
Tag6574:TTAACCACTG
Tag6575:TTAACCTGCG
Tag6576:TTAACGAGCA
Tag6577:TTAACGCCGG
Tag6578:TTAACGCGAC
Tag6579:TTAACGGCTT
Tag6580:TTAACGGTCC
Tag6581:TTAAGACAGC
Tag6582:TTAAGAGGCG
Tag6583:TTAAGCATCC
Tag6584:TTAAGCTCGA
Tag6585:TTAAGGCAAG
Tag6586:TTAAGTGCGT
Tag6587:TTAATCGGTG
Tag6588:TTAATGCGCG
Tag6589:TTACAACGCC
Tag6590:TTACAAGCGA
Tag6591:TTACAAGGTG
Tag6592:TTACACACGG
Tag6593:TTACACCAAC
Tag6594:TTACAGCACT
Tag6595:TTACAGCCAG
Tag6596:TTACAGGATC
Tag6597:TTACAGTTGG
Tag6598:TTACCAGACC
Tag6599:TTACCGACAA
Tag6600:TTACCGATTC
Tag6601:TTACCGTGAG
Tag6602:TTACCTAACG
Tag6603:TTACCTCAGA
Tag6604:TTACCTTGGC
Tag6605:TTACGACTTG
Tag6606:TTACGAGTCT
Tag6607:TTACGCATGT
Tag6608:TTACGCGCAT
Tag6609:TTACGGAACA
Tag6610:TTACGGACGC
Tag6611:TTACGGTGTA
Tag6612:TTACGTCACC
Tag6613:TTACGTCGGT
Tag6614:TTACGTGCCG
Tag6615:TTACGTTCTC
Tag6616:TTACTACTGC
Tag6617:TTACTAGGCA
Tag6618:TTACTCCAGG
Tag6619:TTACTCCTCA
Tag6620:TTACTCGCGC
Tag6621:TTACTGCCTT
Tag6622:TTACTTCGTG
Tag6623:TTAGAATCGG
Tag6624:TTAGACCACA
Tag6625:TTAGACCTTC
Tag6626:TTAGACTGCC
Tag6627:TTAGAGAGGT
Tag6628:TTAGAGCCGC
Tag6629:TTAGAGCGTA
Tag6630:TTAGATGGAC
Tag6631:TTAGCACATC
Tag6632:TTAGCAGTCG
Tag6633:TTAGCCGATA
Tag6634:TTAGCCGCCT
Tag6635:TTAGCGTATG
Tag6636:TTAGCGTGGA
Tag6637:TTAGCTCGTT
Tag6638:TTAGGAGGAA
Tag6639:TTAGGCACAA
Tag6640:TTAGGTAGCG
Tag6641:TTAGGTGAAG
Tag6642:TTAGGTGTTC
Tag6643:TTAGTGGTCA
Tag6644:TTAGTTGCTG
Tag6645:TTATACCGTG
Tag6646:TTATAGGAGG
Tag6647:TTATCATGCC
Tag6648:TTATCCACGT
Tag6649:TTATCGCTGA
Tag6650:TTATCTCGAG
Tag6651:TTATCTGTGC
Tag6652:TTATCTTCCG
Tag6653:TTATGAGCAC
Tag6654:TTATGCCTAC
Tag6655:TTATGGACCT
Tag6656:TTATGGTGGT
Tag6657:TTATGTCAGG
Tag6658:TTATTCACCG
Tag6659:TTATTCGTCC
Tag6660:TTCAACAAGC
Tag6661:TTCAACGTCT
Tag6662:TTCAACTACG
Tag6663:TCGTTAGATC
Tag6664:TCGTTCGTAA
Tag6665:TCGTTGTAGC
Tag6666:TCTAACGATC
Tag6667:TCTAACGTGT
Tag6668:TCTAAGAGAG
Tag6669:TCTAATCGCA
Tag6670:TCTACAGCTA
Tag6671:TCTACATCAG
Tag6672:TCTACCAGTC
Tag6673:TCTACGACGA
Tag6674:TCTACTGAAC
Tag6675:TCTAGACAGG
Tag6676:TCTAGAGTGC
Tag6677:TCTAGCACCA
Tag6678:TCTAGCCAAC
Tag6679:TCTAGCTGCG
Tag6680:TCTAGGAAGT
Tag6681:TCTAGGATTG
Tag6682:TCTAGGCATA
Tag6683:TCTATCGCCG
Tag6684:TCTATCGTAC
Tag6685:TCTATTAGCC
Tag6686:TCTATTGGTG
Tag6687:TCTCAAGAAC
Tag6688:TCTCAAGCCG
Tag6689:TCTCAAGGTT
Tag6690:TCTCACCAGG
Tag6691:TCTCAGCCTC
Tag6692:TCTCAGCGGT
Tag6693:TCTCAGGTCC
Tag6694:TCTCATCTGA
Tag6695:TCTCATGAGT
Tag6696:TCTCCAACTT
Tag6697:TCTCCACGCT
Tag6698:TCTCCGATTA
Tag6699:TCTCCGTACT
Tag6700:TCTCCTAGCA
Tag6701:TCTCCTCCAC
Tag6702:TCTCCTTGAT
Tag6703:TCTCGACTGT
Tag6704:TCTCGCAGGA
Tag6705:TCTCGCATCG
Tag6706:TCTCGCGCTT
Tag6707:TCTCGGAGTT
Tag6708:TCTCGGCTAC
Tag6709:TCTCGGTCTG
Tag6710:TCTCGTATGC
Tag6711:TCTCGTGCGA
Tag6712:TCTCTAGCGC
Tag6713:TCTCTCAACA
Tag6714:TCTCTCCGTC
Tag6715:TCTCTGACCG
Tag6716:TCTCTGTTGA
Tag6717:TCTCTTAGGT
Tag6718:TCTGAAGACA
Tag6719:TCTGAATGCC
Tag6720:TCTGACACAA
Tag6721:TCTGACTATG
Tag6722:TCTGAGCGTG
Tag6723:TCTGAGGCAC
Tag6724:TCTGAGTCGA
Tag6725:TCTGAGTTCT
Tag6726:TCTGATCGGC
Tag6727:TCTGATGGAA
Tag6728:TCTGCACATT
Tag6729:TCTGCCGGAT
Tag6730:TCTGCGACAG
Tag6731:TCTGCGGTAA
Tag6732:TCTGCTATAC
Tag6733:TCTGCTTCCA
Tag6734:TCTGGACGTC
Tag6735:TCTGGATAAG
Tag6736:TCTGGCTCCT
Tag6737:TCTGGTCACC
Tag6738:TCTGTACGCG
Tag6739:TCTGTGCCGT
Tag6740:TCTGTGGTTC
Tag6741:TCTGTTGCGG
Tag6742:TCTTACCACT
Tag6743:TCTTACCGAA
Tag6744:TCTTAGGCCT
Tag6745:TCTTAGGTGG
Tag6746:TCTTAGTGAC
Tag6747:TCTTATTCGC
Tag6748:TCTTCGTGTA
Tag6749:TCTTCTCCTG
Tag6750:TCTTGAGAGA
Tag6751:TCTTGAGTTG
Tag6752:TCTTGCAGAT
Tag6753:TCTTGCGTCT
Tag6754:TCTTGGAGGC
Tag6755:TCTTGTACGT
Tag6756:TGAACAACTC
Tag6757:TGAACAGACA
Tag6758:TGAACATCGG
Tag6759:TGAACCACAA
Tag6760:TGAACCAGCC
Tag6761:TGAACCGAAG
Tag6762:TGAACCGTCT
Tag6763:TGAACCTGAT
Tag6764:TGAACGGAGC
Tag6765:TGAACGTTAC
Tag6766:TGAACTGCGA
Tag6767:TGAAGACGTC
Tag6768:TGAAGCCATA
Tag6769:TGAAGCTAGG
Tag6770:TGAAGGACGA
Tag6771:TGAAGGTACT
Tag6772:TGAAGGTGAG
Tag6773:TGAAGTCAAC
Tag6774:TGAAGTCTCG
Tag6775:TGAATACACG
Tag6776:TGAATACGGA
Tag6777:TGAATAGCTG
Tag6778:TGAATCCGAC
Tag6779:TGAATCGCGT
Tag6780:TGAATTCCAG
Tag6781:TGAATTGTGC
Tag6782:TGACAACCGT
Tag6783:TGACAAGAGG
Tag6784:TGACAATGAC
Tag6785:TGACACATCA
Tag6786:TGACACGATT
Tag6787:TGACACTAGA
Tag6788:TGACAGAAGC
Tag6789:TGACAGTCAT
Tag6790:TGACATAGGT
Tag6791:TGACATCGTA
Tag6792:TGACATGGAG
Tag6793:TGACATTACG
Tag6794:TGACCACCAG
Tag6795:TGACCACTCC
Tag6796:TGACCAGTTA
Tag6797:TGACCGACCT
Tag6798:TGACCGTTCG
Tag6799:TGACCTAATC
Tag6800:TGACCTGCTG
Tag6801:TGACGACTAT
Tag6802:TGACGCAACT
Tag6803:TGACGCGGAA
Tag6804:TGACGCTCGT
Tag6805:TGACGGATTA
Tag6806:TGACGGTTGC
Tag6807:TGACGTAGCC
Tag6808:TGACGTATAG
Tag6809:TGACGTCTTC
Tag6810:TGACGTGGTT
Tag6811:TGACTATGCT
Tag6812:TGACTGACGG
Tag6813:TGACTGTATC
Tag6814:TGACTTCCGC
Tag6815:TGAGACTCGC
Tag6816:TGAGAGATAG
Tag6817:TGAGAGCGCT
Tag6818:TGAGATACCT
Tag6819:TGAGATCAAG
Tag6820:TGAGATCTGT
Tag6821:TGAGCAATGG
Tag6822:TGAGCGATCC
Tag6823:TGAGCGCTAA
Tag6824:TGAGCTAGTA
Tag6825:TGAGCTCTTG
Tag6826:TGAGCTGACT
Tag6827:TGAGCTTCAA
Tag6828:TGAGGAGCCA
Tag6829:TGAGGCATAT
Tag6830:TGAGGTTGAT
Tag6831:TGAGTAGAGT
Tag6832:TGAGTCAGCG
Tag6833:TGAGTGGCTA
Tag6834:TGAGTGTACA
Tag6835:TGATAAGACC
Tag6836:TGATAATGCG
Tag6837:TGATACGCGG
Tag6838:TGATCACCTT
Tag6839:TGATCAGGAT
Tag6840:TGATCGAGGC
Tag6841:TGATCGCAAG
Tag6842:TGATCTCGGT
Tag6843:TGATGAACAG
Tag6844:TGATGAGTGG
Tag6845:TGATGCCAAT
Tag6846:TGATGGAATC
Tag6847:TGATGGCCGT
Tag6848:TGATGTCGAA
Tag6849:TGATTCCACA
Tag6850:TGATTGCGTA
Tag6851:TGATTGGAGA
Tag6852:TGATTGTCTG
Tag6853:TGCAACACTA
Tag6854:TGCAACAGAT
Tag6855:TGCAACCTTC
Tag6856:TGCAAGACAG
Tag6857:TGCAAGATGA
Tag6858:TGCAAGCGTG
Tag6859:TGCAAGGCCT
Tag6860:TGCAAGTAGC
Tag6861:TGCAATCCAT
Tag6862:TGCAATTGAG
Tag6863:TGCACAAGTA
Tag6864:TGCACACCGA
Tag6865:TGCACAGTCG
Tag6866:TGCACATATC
Tag6867:TGCACCTCCT
Tag6868:TGCACGCCTT
Tag6869:TGCACGGTAT
Tag6870:TGCACGTCAA
Tag6871:TGCACTAATG
Tag6872:TGCACTAGGC
Tag6873:TGCAGAATCC
Tag6874:TGCAGATGTG
Tag6875:TGCAGCAGCA
Tag6876:TGCAGCCTGA
Tag6877:TGCAGCTTCG
Tag6878:TGCAGGCAGT
Tag6879:TGCAGTCGTT
Tag6880:TGCAGTGACC
Tag6881:TGCAGTTGGA
Tag6882:TGCATATAGG
Tag6883:TGCATCTACC
Tag6884:TGCATTCCTA
Tag6885:TGCATTCGCC
Tag6886:TGCCAACCAC
Tag6887:TGCCACGCAT
Tag6888:TGCCACTGTA
Tag6889:TGCCAGAGCT
Tag6890:TGCCAGCTAA
Tag6891:TGCCATACGG
Tag6892:TGCCATCACA
Tag6893:TGCCATGATG
Tag6894:TGCCGAGTCA
Tag6895:TGCCGGAATG
Tag6896:TGCCGGTAAC
Tag6897:TGCCGTAGAT
Tag6898:TGCCGTTACT
Tag6899:TGCCTAACCT
Tag6900:TGCCTATCGC
Tag6901:TGCCTCAGAG
Tag6902:TGCCTCCACT
Tag6903:TGCCTGAAGT
Tag6904:TGCCTGACTC
Tag6905:TGCCTGGTGA
Tag6906:TGCCTTCTCG
Tag6907:TGCCTTGGCT
Tag6908:TGCGAACTTA
Tag6909:TGCGACGATA
Tag6910:TGCGAGGTAC
Tag6911:TGCGAGTCTC
Tag6912:TGCGATATTG
Tag6913:TGCGATCCGA
Tag6914:TGCGATGAGT
Tag6915:TGCGATTGCA
Tag6916:TGCGCAGAAG
Tag6917:TGCGCCATCA
Tag6918:TGCGCTGTAA
Tag6919:TGCGCTTGTG
Tag6920:TGCGGACACA
Tag6921:TGCGGCAAGA
Tag6922:TGCGGCTCAA
Tag6923:TGCGTAAGGT
Tag6924:TGCGTACCAT
Tag6925:TGCGTATGAA
Tag6926:TGCGTCATGG
Tag6927:TGCGTGAGCA
Tag6928:TGCGTGCATA
Tag6929:TGCGTTCTGC
Tag6930:TGCTAATGGA
Tag6931:TGCTACCACC
Tag6932:TGCTACTAGT
Tag6933:TGCTATGCAG
Tag6934:TGCTCAATAC
Tag6935:TGCTCAGATT
Tag6936:TGCTCATTCA
Tag6937:TGCTCCACGA
Tag6938:TGCTCCTAAC
Tag6939:TGCTCGTGAG
Tag6940:TGCTCTCTGG
Tag6941:TGCTGAACGC
Tag6942:TGCTGCAGTC
Tag6943:TGCTGCTGAT
Tag6944:TGCTGGATCT
Tag6945:TGCTGGTATA
Tag6946:TGCTGTCTTA
Tag6947:TGCTTCCAAG
Tag6948:TGCTTCGCTG
Tag6949:TGGAACAAGG
Tag6950:TGGAACGGAA
Tag6951:TGGAACTCAC
Tag6952:TGGAAGCACA
Tag6953:TGGAAGCTGT
Tag6954:TGGAAGTATG
Tag6955:TGGAATACCA
Tag6956:TGGACAATAG
Tag6957:TGGACACCTG
Tag6958:TGGACAGGAC
Tag6959:TGGACCTACG
Tag6960:TGGACGAAGT
Tag6961:TGGACGTGCT
Tag6962:TGGACTCTTA
Tag6963:TGGACTTCAG
Tag6964:TGGAGAACCG
Tag6965:TGGAGAGGCA
Tag6966:TGGAGATCGA
Tag6967:TGGAGATTCT
Tag6968:TGGAGCAGTG
Tag6969:TGGAGCCGAT
Tag6970:TGGAGGACAT
Tag6971:TGGAGGTGTA
Tag6972:TGGAGTAGAC
Tag6973:TGGAGTTGCG
Tag6974:TGGATACGAG
Tag6975:TGGATAGCAT
Tag6976:TGGATATGGC
Tag6977:TGGATCGACT
Tag6978:TGGATCGGTC
Tag6979:TGGATGATCC
Tag6980:TGGATGCAGC
Tag6981:TGGATGGATA
Tag6982:TGGATTAACG
Tag6983:TGGATTGTAG
Tag6984:TGGCAACAGC
Tag6985:TGGCAAGGTC
Tag6986:TGGCAATCTA
Tag6987:TGGCACATTG
Tag6988:TGGCACGAAC
Tag6989:TGGCACTGAT
Tag6990:TGGCAGAATT
Tag6991:TGGCAGACAA
Tag6992:TGGCAGTTCA
Tag6993:TGGCATCTGG
Tag6994:TGGCATGCCT
Tag6995:TGGCCGATGA
Tag6996:TGGCCTGTAC
Tag6997:TGGCCTTCTT
Tag6998:TGGCGATACA
Tag6999:TGGCGGCAAT
Tag7000:TGGCGTAGGA
Tag7001:TGGCTACATA
Tag7002:TGGCTATTAC
Tag7003:TGGCTCAACC
Tag7004:TGGCTCATGT
Tag7005:TGGCTCGCTT
Tag7006:TGGCTGGTTC
Tag7007:TGGCTGTGGT
Tag7008:TGGCTTATCA
Tag7009:TGGTACGTTA
Tag7010:TGGTACTGCC
Tag7011:TGGTAGATGC
Tag7012:TGGTAGCGTC
Tag7013:TGGTATTCTC
Tag7014:TGGTCACCAC
Tag7015:TGGTCCAATT
Tag7016:TGGTCTACCG
Tag7017:TGGTCTAGAA
Tag7018:TGGTGACAGG
Tag7019:TGGTGAGCTT
Tag7020:TGGTGCCTCT
Tag7021:TGGTGCGCAA
Tag7022:TGGTGGTACC
Tag7023:TGGTGGTTGT
Tag7024:TGGTTACGCT
Tag7025:TGGTTAGCCA
Tag7026:TGGTTCGTCG
Tag7027:TGGTTGGAAT
Tag7028:TGGTTGTCAC
Tag7029:TGTAACGCTG
Tag7030:TGTACCGTAA
Tag7031:TGTACGGCAG
Tag7032:TGTACTCACT
Tag7033:TGTAGGCTCA
Tag7034:TGTAGTGCGC
Tag7035:TGTAGTGGAG
Tag7036:TGTATAGGCT
Tag7037:TGTATCTGCA
Tag7038:TGTATGCCTG
Tag7039:TGTCAAGGCA
Tag7040:TGTCACTCAG
Tag7041:TGTCACTTGC
Tag7042:TGTCAGAGTA
Tag7043:TGTCAGGCTT
Tag7044:TGTCATAACC
Tag7045:TGTCCAGGTG
Tag7046:TGTCCTCGTT
Tag7047:TGTCGCATAA
Tag7048:TGTCGCGTTC
Tag7049:TGTCGGACGT
Tag7050:TGTCGGTGCT
Tag7051:TGTCGTTAAG
Tag7052:TGTCTATACG
Tag7053:TGTCTCGAGC
Tag7054:TGTCTGATTG
Tag7055:TGTCTGCCAT
Tag7056:TGTCTGCGGA
Tag7057:TGTCTTCATC
Tag7058:TGTCTTGTCC
Tag7059:TTCAAGGAGA
Tag7060:TTCAATCGAC
Tag7061:TTCACAACCT
Tag7062:TTCACAATGG
Tag7063:TTCACACAGT
Tag7064:TTCACCGGAA
Tag7065:TTCACGATAC
Tag7066:TTCACGCTCG
Tag7067:TTCACGTAGG
Tag7068:TTCAGAACAG
Tag7069:TTCAGAGGTC
Tag7070:TTCAGATCCA
Tag7071:TTCAGATTGC
Tag7072:TTCAGCTGAC
Tag7073:TTCAGGTCGT
Tag7074:TTCAGTATCG
Tag7075:TTCATCGCCA
Tag7076:TTCATGGAAG
Tag7077:TTCATGGTGC
Tag7078:TTCATTGCTC
Tag7079:TTCCAACATC
Tag7080:TTCCACCTGG
Tag7081:TTCCACGGAC
Tag7082:TTCCAGACTG
Tag7083:TTCCAGAGAA
Tag7084:TTCCAGCGTT
Tag7085:TTCCAGTAGT
Tag7086:TTCCATCGCG
Tag7087:TTCCATGGTA
Tag7088:TTCCATTCAC
Tag7089:TTCCGAAGGT
Tag7090:TTCCGCAACG
Tag7091:TTCCGCCTAT
Tag7092:TTCCGCTCCT
Tag7093:TTCCGCTGTG
Tag7094:TTCCGGAGTC
Tag7095:TTCCGGTCAG
Tag7096:TTCCGGTTCC
Tag7097:TTCCGTAAGC
Tag7098:TTCCGTCCAA
Tag7099:TTCCTACGAG
Tag7100:TTCCTAGCCG
Tag7101:TTCCTCACGT
Tag7102:TTCCTCTAAC
Tag7103:TTCCTGATAG
Tag7104:TTCCTGTCGA
Tag7105:TTCCTTGAGG
Tag7106:TTCGACGCAG
Tag7107:TTCGAGAACC
Tag7108:TTCGAGACAT
Tag7109:TTCGAGGTTG
Tag7110:TTCGATCCTG
Tag7111:TTCGATGACG
Tag7112:TTCGCAATTC
Tag7113:TTCGCAGAGC
Tag7114:TTCGCAGCAA
Tag7115:TTCGCCTGAG
Tag7116:TTCGCGGACT
Tag7117:TTCGCGTCAC
Tag7118:TTCGCGTGTT
Tag7119:TTCGCTAAGA
Tag7120:TTCGCTGGTC
Tag7121:TTCGGAATGA
Tag7122:TTCGGAGTAG
Tag7123:TTCGGATACT
Tag7124:TTCGGCCATG
Tag7125:TTCGGCGAGT
Tag7126:TTCGTACCTA
Tag7127:TTCGTAGGAT
Tag7128:TTCGTATTGG
Tag7129:TTCGTCAACT
Tag7130:TTCGTGATGT
Tag7131:TTCGTTACGC
Tag7132:TTCGTTCACA
Tag7133:TTCGTTGAAC
Tag7134:TTCTAAGTCC
Tag7135:TTCTACCGGC
Tag7136:TTCTAGATGG
Tag7137:TTCTAGCAAG
Tag7138:TTCTATGCGA
Tag7139:TTCTCAAGTG
Tag7140:TTCTCCGATG
Tag7141:TTCTCCTGGA
Tag7142:TTCTCGGCGT
Tag7143:TTCTCTATCC
Tag7144:TTCTCTTAGC
Tag7145:TTCTGACGCT
Tag7146:TTCTGCCGTA
Tag7147:TTCTGCTACA
Tag7148:TTCTGCTTGT
Tag7149:TTCTGTGATC
Tag7150:TTCTGTGGAG
Tag7151:TTCTGTTCTG
Tag7152:TTCTGTTGCC
Tag7153:TTCTTACACG
Tag7154:TTCTTGTGCA
Tag7155:TTGAACTCTG
Tag7156:TTGAAGCGCC
Tag7157:TTGAAGGAAC
Tag7158:TTGAAGTCCA
Tag7159:TTGAATGGCA
Tag7160:TTGACAGGTA
Tag7161:TTGACCGTGC
Tag7162:TTGACGTGAA
Tag7163:TTGACTAGAG
Tag7164:TTGACTTACC
Tag7165:TTGAGAACGT
Tag7166:TTGAGACTCA
Tag7167:TTGAGCCTGG
Tag7168:TTGAGCGACG
Tag7169:TTGAGGAGCT
Tag7170:TTGAGGTCTC
Tag7171:TTGAGTAAGG
Tag7172:TTGATCCGCT
Tag7173:TTGCAACGTA
Tag7174:TTGCAAGACT
Tag7175:TTGCAATGCG
Tag7176:TTGCACTTCT
Tag7177:TTGCAGCCGT
Tag7178:TTGCATTAGC
Tag7179:TTGCCAAGTC
Tag7180:TTGCCAGTGA
Tag7181:TTGCCATCAG
Tag7182:TTGCCGGTTG
Tag7183:TTGCCGTATC
Tag7184:TTGCCTATGT
Tag7185:TTGCGATAGG
Tag7186:TTGCGCCAAG
Tag7187:TTGCGGCTTC
Tag7188:TTGCGGTGAC
Tag7189:TTGCGTCTCG
Tag7190:TTGCTCACCA
Tag7191:TTGCTGGACC
Tag7192:TTGCTTCGGC
Tag7193:TTGGAAGTAC
Tag7194:TTGGACCTAT
Tag7195:TTGGACTGGA
Tag7196:TTGGATCAGT
Tag7197:TTGGATTCCG

[10nt ed4]
Tag0:TTGTCCAGAG
Tag1:AACAACAACC
Tag2:AACAACCGAA
Tag3:AACAACGCTG
Tag4:AACAAGACGT
Tag5:AACAAGGTAC
Tag6:AACAATCAGG
Tag7:AACACAAGAG
Tag8:AACACACTCA
Tag9:AACACCTAGT
Tag10:AACACGTGCC
Tag11:AACACTCCTT
Tag12:AACAGAATGC
Tag13:AACAGCTTCG
Tag14:AACAGGCAAT
Tag15:AACATGGAGA
Tag16:AACATTACCG
Tag17:AACCAACGGC
Tag18:AACCACAGTT
Tag19:AACCAGCCAG
Tag20:AACCAGTTGA
Tag21:AACCATGATC
Tag22:AACCGAACAA
Tag23:AACCGCGACT
Tag24:AACCGGAAGG
Tag25:AACCGGCGTA
Tag26:AACCTAGTCC
Tag27:AACCTCATAG
Tag28:AACCTTAGGA
Tag29:AATAATCGCC
Tag30:AATACACAGC
Tag31:AATACAGCCT
Tag32:AATACCGGTA
Tag33:AATACGAACG
Tag34:AATACTGTGG
Tag35:AATAGCCACA
Tag36:AATAGGACTC
Tag37:AATCACGCGA
Tag38:AATCCATCTG
Tag39:AATCCGAGGT
Tag40:AATCCGCTCC
Tag41:AATCCTACCA
Tag42:AATCCTGGAC
Tag43:AATCGAGTAG
Tag44:AATCGCTTGT
Tag45:AATCGTCCGC
Tag46:AATCTGGCTT
Tag47:AATGAACACG
Tag48:AATGACCTTC
Tag49:AATGAGAGCA
Tag50:AATGAGGTGT
Tag51:AATGATTCGG
Tag52:AATGCACGAT
Tag53:AATGCCTAAG
Tag54:AATGGATGGC
Tag55:AATGGCTCTA
Tag56:AATGGTAACC
Tag57:AATGTCAGTG
Tag58:AATTAGGCCG
Tag59:AATTCCTGCT
Tag60:AATTGCGATG
Tag61:ACAACAAGGA
Tag62:ACAACACCAT
Tag63:ACAACAGTCG
Tag64:ACAACCATAC
Tag65:ACAACCTGTT
Tag66:ACAACGGAGC
Tag67:ACAAGAACTG
Tag68:ACAAGCGCGA
Tag69:ACAAGGTTGG
Tag70:ACAAGTCACC
Tag71:ACAATATGCC
Tag72:ACAATCCTCA
Tag73:ACAATTCGAG
Tag74:ACACAATCTC
Tag75:ACACAGTGAA
Tag76:ACACATCGGT
Tag77:ACACCGAATT
Tag78:ACACCTGGCA
Tag79:ACACGACAAG
Tag80:ACACGCAGTA
Tag81:ACACGGTCCT
Tag82:ACACGTATCG
Tag83:ACACTAACCA
Tag84:ACACTCCAGC
Tag85:ACACTTGCTG
Tag86:ACAGAAGAAC
Tag87:ACAGACGTTA
Tag88:ACAGACTACT
Tag89:ACAGCTCGTC
Tag90:ACAGGAGGCT
Tag91:ACAGGATAGA
Tag92:ACAGTCATGT
Tag93:ACAGTGCCAA
Tag94:ACAGTGGACG
Tag95:ACATAAGCGG
Tag96:ACATAGCCTT
Tag97:ACATCTGAAG
Tag98:ACATGTGTGC
Tag99:ACCAAGCTTA
Tag100:ACCAATGGAT
Tag101:ACCACTAATG
Tag102:ACCACTTCAA
Tag103:ACCAGGACCA
Tag104:ACCATAACAC
Tag105:ACCGAACCGT
Tag106:ACCGAATTAG
Tag107:ACCGAGAGTC
Tag108:ACCGATCGCA
Tag109:ACCGCATACC
Tag110:ACCGCCAGAT
Tag111:ACCGGTACAG
Tag112:ACCGGTGATT
Tag113:ACCGTACTTC
Tag114:ACCGTCTAGG
Tag115:ACCGTTGTAA
Tag116:ACCTACATGA
Tag117:ACCTATTGGC
Tag118:ACCTCAACTT
Tag119:ACCTCCGACA
Tag120:ACCTCGGTAT
Tag121:ACCTCTCTCC
Tag122:ACCTGATTCT
Tag123:ACCTGTCCGA
Tag124:ACCTTATGTG
Tag125:ACCTTGCACT
Tag126:ACGAACTCCG
Tag127:ACGAATGACA
Tag128:ACGACATTGC
Tag129:AACGCGCATC
Tag130:AACGTAAGCT
Tag131:AACGTGGTTG
Tag132:AACTCTACAC
Tag133:AACTGTGTCA
Tag134:AACTTCGCAA
Tag135:AACTTGTGGT
Tag136:AAGAACCTCT
Tag137:AAGAAGTGAG
Tag138:AAGACCATGA
Tag139:AAGACCGCAC
Tag140:AAGACGGATT
Tag141:AAGAGACCGG
Tag142:AAGAGATACC
Tag143:AAGAGTAGGT
Tag144:AAGATCGGCG
Tag145:AAGATGTCCA
Tag146:AAGCACTTAC
Tag147:AAGCATATGG
Tag148:AAGCGATGTT
Tag149:AAGCGCGGAA
Tag150:AAGCGTTCAG
Tag151:AAGCTAAGAC
Tag152:AAGCTCACCT
Tag153:AAGGAACGTA
Tag154:AAGGATCCAT
Tag155:AAGGCATGCG
Tag156:AAGGTAGAAG
Tag157:AAGGTCTGGA
Tag158:AAGGTGCTAC
Tag159:AAGTCAATCC
Tag160:AAGTCGCAGG
Tag161:AAGTTAGCGC
Tag162:AAGTTCCTTG
Tag163:AAGTTGGTCT
Tag164:ACTGGACGTG
Tag165:ACTGGCGCAT
Tag166:ACTGGCTTCC
Tag167:ACTGTAGCTA
Tag168:ACTGTTAGAC
Tag169:ACTGTTCTCG
Tag170:ACTTAACTGC
Tag171:ACTTACCAAG
Tag172:ACTTACGTCT
Tag173:ACTTAGAACC
Tag174:ACTTCAGAGT
Tag175:ACTTCATCAC
Tag176:ACTTCGTTGA
Tag177:ACTTCTCCTG
Tag178:ACTTGAGGAA
Tag179:ACTTGTAAGG
Tag180:AGAACAGCTA
Tag181:AGAACCACGG
Tag182:AGAACTTGGC
Tag183:AGAAGACGAA
Tag184:AGAAGCAATC
Tag185:AGAAGGCCGT
Tag186:AGAAGTCTTG
Tag187:AGAATAGAGG
Tag188:AGAATGGTCC
Tag189:AGACACATTG
Tag190:AGACCGTTAT
Tag191:AGACGACTCC
Tag192:AGACGGAGAG
Tag193:AGACTAGCAT
Tag194:AGACTCTCGA
Tag195:AGAGATGCAG
Tag196:AGAGCCGATG
Tag197:AGAGCTTACA
Tag198:AGAGTGACTT
Tag199:AGAGTGTAAC
Tag200:AGAGTTCTGC
Tag201:AGATAGTGCT
Tag202:AGATCAGACC
Tag203:AGATGGTATG
Tag204:AGATTCGGTT
Tag205:AGCAATGCGC
Tag206:AGCAGACCTC
Tag207:ACGAGCGTAG
Tag208:ACGATCTATC
Tag209:ACGATGAAGT
Tag210:ACGCAACACT
Tag211:ACGCAAGGTG
Tag212:ACGCCAATAA
Tag213:ACGCCTCAAC
Tag214:ACGCCTTCGT
Tag215:ACGCTGGATA
Tag216:ACGGCGAACA
Tag217:ACGGTCCGTT
Tag218:ACGTAGGCAC
Tag219:ACGTGCTGAT
Tag220:ACTCAGGTTC
Tag221:ACTCCAAGCC
Tag222:ACTGCCACTC
Tag223:AGCAGTGGTA
Tag224:AGCATGTCAT
Tag225:AGCCAAGTGG
Tag226:AGCCACTAGC
Tag227:AGCCAGAATA
Tag228:AGCCAGCTCT
Tag229:AGCCGCCTAA
Tag230:AGCGATAACG
Tag231:AGCGCATGGA
Tag232:AGCGGTTGCT
Tag233:AGCGTACAAT
Tag234:AGCTACCGTG
Tag235:AGCTATTCCA
Tag236:AGCTCCTCAG
Tag237:AGCTCGATGC
Tag238:AGCTGACACA
Tag239:AGCTGGTGAA
Tag240:AGCTTGGCTC
Tag241:AGGAACGAGT
Tag242:AGGAAGATCG
Tag243:AGGACATAAG
Tag244:AGGACTGTTC
Tag245:AGGAGGCATA
Tag246:AGGATACTGA
Tag247:AGGCAAGCCA
Tag248:AGGCCGTAGA
Tag249:AGGCCTGACT
Tag250:AGGCGTCTGT
Tag251:AGGCTCAAGG
Tag252:AGGCTTAGTT
Tag253:AGGTACAGGC
Tag254:AGGTATCCTC
Tag255:AGGTCACCAA
Tag256:AGGTGAATAG
Tag257:AGGTTCGAAC
Tag258:AGGTTGTCGG
Tag259:AGTAACTCAC
Tag260:AGTAAGCGTT
Tag261:AGTACGCCAG
Tag262:AGTAGGAGGA
Tag263:AGTATACGCG
Tag264:AGTATCTGGT
Tag265:AGTCACAACT
Tag266:AGTCATTGAG
Tag267:AGTCCACGTA
Tag268:AGTCCTAATC
Tag269:AGTCTCGGCA
Tag270:AGTCTGTACG
Tag271:AGTGAAGGCC
Tag272:AGTGAGCCGA
Tag273:AGTGCAATGT
Tag274:AGTGTCCATA
Tag275:AGTTGCTAGA
Tag276:AGTTGTTGTC
Tag277:ATAACGCCTC
Tag278:ATAAGAGGTC
Tag279:ATAAGGTGCA
Tag280:ATACACGACA
Tag281:ATACCTCCGG
Tag282:ATACTGACGC
Tag283:ATAGCAACCG
Tag284:ATAGCAGTGC
Tag285:ATAGGCCATT
Tag286:ATAGGCTGAC
Tag287:ATAGGTTCGT
Tag288:ATATCCGCAT
Tag289:ATATGTGCCG
Tag290:ATCAGCACTT
Tag291:ATCAGCGAGG
Tag292:ATCCAATACG
Tag293:ATCCGCTGTG
Tag294:ATCCGTCCAT
Tag295:ATCCTTGGCG
Tag296:ATCGACACGG
Tag297:ATCGACGGCT
Tag298:ATCGAGTTCC
Tag299:ATCGCAGCAA
Tag300:ATCGCGATTA
Tag301:ATCGGTAGGC
Tag302:ATCGTCTCCA
Tag303:ATCTAAGGAG
Tag304:ATCTGCGTAC
Tag305:ATCTTCAACG
Tag306:ATGACGGTAA
Tag307:ATGACTCAGT
Tag308:ATGATGCACC
Tag309:ATGCACCGGA
Tag310:ATGCCTTGAA
Tag311:ATGCGAGAGA
Tag312:ATGCGCATAT
Tag313:ATGCGGACTG
Tag314:ATGCTCTGCC
Tag315:ATGCTTCCTA
Tag316:ATGGACCAAC
Tag317:ATGGAGCTGG
Tag318:ATGGCAGGTT
Tag319:ATGGTACTCT
Tag320:ATGGTCTTAG
Tag321:ATGGTGAGCG
Tag322:ATGTGGAAGC
Tag323:ATGTTGCCAT
Tag324:ATTATCGGAC
Tag325:ATTCGACATC
Tag326:ATTCGGAACA
Tag327:ATTCTAGCGG
Tag328:ATTGCCGTCA
Tag329:CAACAATCCA
Tag330:CAACACGTAA
Tag331:CAACAGAACT
Tag332:CAACATACGC
Tag333:CAACATTGTG
Tag334:CAACCACCTC
Tag335:CAACCGATTG
Tag336:CAACCTCTGA
Tag337:CAACGAGATA
Tag338:CAACGCACAG
Tag339:CAACGGTGGA
Tag340:CAACGTTAAC
Tag341:CAACTCAGGT
Tag342:CAACTGCTAT
Tag343:CAAGAAGCAT
Tag344:CAAGACAGTC
Tag345:CAAGATGAGG
Tag346:CAAGCCAACG
Tag347:CAAGCCGTGT
Tag348:CAAGGCCTTA
Tag349:CAAGTACCGA
Tag350:CAAGTGGATC
Tag351:CCGAACAAGC
Tag352:CCGAACCTAA
Tag353:CCGAAGACCT
Tag354:CCGAAGTGGA
Tag355:CCGAATAGTG
Tag356:CCGACAACAG
Tag357:CCGACACGTT
Tag358:CCGACTTCTC
Tag359:CCGAGAATTA
Tag360:CCGAGGTAAT
Tag361:CCGATCCACT
Tag362:CCGATGATAC
Tag363:CCGATTACGA
Tag364:CCGCACTCAT
Tag365:CCGCCTGTTA
Tag366:CCGCGATGAA
Tag367:CCGCGTTATG
Tag368:CCGCTAGCTT
Tag369:CCGCTATTCG
Tag370:CCGGAATGCT
Tag371:CCGGAGTATC
Tag372:CCGGCCAATT
Tag373:CCGGTAAGTC
Tag374:CCGGTCTCTA
Tag375:CCGGTTGGAT
Tag376:CCGTACGATG
Tag377:CCGTCAGAAC
Tag378:CCGTCTTGCA
Tag379:CATTCCGGAG
Tag380:CATTCGACGA
Tag381:CATTCGTGTC
Tag382:CATTCTCAAC
Tag383:CATTCTTCCG
Tag384:CATTGAACCT
Tag385:CATTGCCAGT
Tag386:CATTGGCTAA
Tag387:CCAACGGCAA
Tag388:CCAACTATGG
Tag389:CCAAGGAGTT
Tag390:CCAATCTCGC
Tag391:CCAATGCCTG
Tag392:CCAATTGTTC
Tag393:CCACAAGTGC
Tag394:CCACCACACA
Tag395:CCACGTAAGA
Tag396:CCACTGTACC
Tag397:CCAGAGCAGA
Tag398:CCAGATAACC
Tag399:CCAGCATCTG
Tag400:CCAGCTTAGT
Tag401:CCAGGTCGAA
Tag402:CCATAACTTG
Tag403:CCATACTGAC
Tag404:CCATAGATCA
Tag405:CCATCAAGAT
Tag406:CCATCATTCC
Tag407:CCATGTGCTT
Tag408:CCATTCAGCG
Tag409:CCATTCCATA
Tag410:CCATTGGTGG
Tag411:CGCTTAAGGC
Tag412:CGCTTACTAA
Tag413:CGCTTATCCT
Tag414:CGCTTCAATT
Tag415:CGCTTCTTGG
Tag416:CGCTTGGAAG
Tag417:CGGAAGCTGT
Tag418:CGGAATACAC
Tag419:CGGACAGAGA
Tag420:CGGACCATAT
Tag421:CGGAGATTGG
Tag422:CGGAGCTCAA
Tag423:CGGAGTCCTT
Tag424:CGGATCGGTA
Tag425:CGGATTCTAG
Tag426:CGGCAACTTA
Tag427:CGGCAAGAAG
Tag428:CGGCTACAGT
Tag429:CGGCTCATCA
Tag430:CGGTAGGACA
Tag431:CGGTATTAGC
Tag432:CGGTCGTATT
Tag433:CGGTCTAACG
Tag434:CGGTGACATC
Tag435:CGGTGTAGAA
Tag436:CGGTTGAGTG
Tag437:CGGTTGTTCC
Tag438:CGTAACACCA
Tag439:CGTAACGGAT
Tag440:CGTAAGATTC
Tag441:CGTAAGTAGG
Tag442:CGTACATCGT
Tag443:CGTACCTTCC
Tag444:CGTACTGTAA
Tag445:CGTAGAAGAC
Tag446:CGTAGTCGCA
Tag447:CGTATGGCCT
Tag448:CGTCAAGTCT
Tag449:CGTCACCTAG
Tag450:CGTCATGATA
Tag451:CGTCCGACTT
Tag452:CGTCCTAGGA
Tag453:CGTCGATACC
Tag454:CGTCGGCAAT
Tag455:CGACGTAGTC
Tag456:CGAGATCTCT
Tag457:CGAGCTGGTT
Tag458:CGAGGAACAA
Tag459:CGAGTATGAT
Tag460:CGATAACCGC
Tag461:CGATAGCGAG
Tag462:CGATCCTGTG
Tag463:CGATCGTCAC
Tag464:CGCATCACAG
Tag465:CGCCAACCAT
Tag466:CGCCAGTGTT
Tag467:CGCCGTAACT
Tag468:CGCCTTGTAC
Tag469:CGCGGATTCA
Tag470:CAATGCGGCT
Tag471:CACAGTTCAT
Tag472:CACATGCTCC
Tag473:CACCTAGAGG
Tag474:CACGACTGGT
Tag475:CACGAGTCTG
Tag476:CACGCATATT
Tag477:CACGCTCCAA
Tag478:CACGTGTTAA
Tag479:CACTAATGCG
Tag480:CACTACGAAT
Tag481:CACTCCTTAC
Tag482:CACTGAGCAC
Tag483:CAGATCAATG
Tag484:CCTAATCATC
Tag485:CCTAGACACG
Tag486:CCTAGCTCCT
Tag487:CCTAGTTGAG
Tag488:CCTATTCTGT
Tag489:CCTCAACCGA
Tag490:CCTCCATAAG
Tag491:CCTCCGTTCT
Tag492:CCTCGAATGG
Tag493:CCTCGTCGTT
Tag494:CCTCTGCGAA
Tag495:CCTGAGAGGT
Tag496:CCTGATGCCA
Tag497:CCTGCAATAC
Tag498:CCTGTCTAAT
Tag499:CCTTCCTAGC
Tag500:CCTTGTATTC
Tag501:CGAATGTGCG
Tag502:CAGGACTTCG
Tag503:CAGGCGATCT
Tag504:CAGTAGGTGC
Tag505:CAGTGCTCTT
Tag506:CAGTTAAGCA
Tag507:CATAGCTATC
Tag508:CATCACCACC
Tag509:CATGGTAGAT
Tag510:CATGTACGCC
Tag511:CATGTTATGG
Tag512:CATGTTGGTA
Tag513:CATTACACTG
Tag514:CGTGAATCCG
Tag515:CGTGAGTTAT
Tag516:CGTGCCATTG
Tag517:CGTGTCAAGC
Tag518:CGTTCAGCTC
Tag519:CTAACACGGC
Tag520:CTAACCTACT
Tag521:CTAACTTCAG
Tag522:CTAAGACTAG
Tag523:CTAAGCGCAC
Tag524:CTAAGTGTCT
Tag525:CTAATAGCGT
Tag526:CTAATCCGAA
Tag527:CTACAAGGTT
Tag528:CTACACCAGG
Tag529:CTACAGGCGA
Tag530:CTACCGGAAC
Tag531:CTACGGATGT
Tag532:CTACTCACTA
Tag533:CTACTCGTCG
Tag534:CTAGCACAAT
Tag535:CTAGCCTGGA
Tag536:CTAGGAATCC
Tag537:CTAGGTCAGC
Tag538:CTAGTTGGCC
Tag539:CTATCCATGC
Tag540:CTATGAACGG
Tag541:CTGGAGGAGT
Tag542:CTGGATTGAC
Tag543:CTGGCATAGG
Tag544:CTGGTGATGA
Tag545:CTGTAACCTT
Tag546:CTGTAGTCAG
Tag547:CTGTCGCTTC
Tag548:CTGTCTGTGT
Tag549:CTGTGCAACA
Tag550:CTGTTACAAG
Tag551:CTTACGAGCA
Tag552:CTTAGCGGTG
Tag553:CTTATACCAC
Tag554:CTTATGTTGC
Tag555:CTTCATATCG
Tag556:CTTCCAAGTG
Tag557:CTTCCGTATA
Tag558:CTTCTCCGCT
Tag559:CTTGACGCAG
Tag560:CTTGCTGACG
Tag561:CTTGGAGAAC
Tag562:CTTGGATCTT
Tag563:GATACGCTTA
Tag564:GATACTTGCA
Tag565:GATAGACTGT
Tag566:GATAGAGGCG
Tag567:GATAGGTCAA
Tag568:GATATAGCTC
Tag569:GATATCAGGA
Tag570:GATATCCTAG
Tag571:GATCAACGTT
Tag572:GATCAATAGC
Tag573:GATCACTCCG
Tag574:GATCCAAGAA
Tag575:GATCCGCAAG
Tag576:GATCGGAATT
Tag577:GATCTCATTC
Tag578:GATCTCTGAT
Tag579:GATCTGGTCG
Tag580:GATGAGTGAC
Tag581:GATGATGTTG
Tag582:GATGCTGCGT
Tag583:GATGGATACA
Tag584:GATGTCAACT
Tag585:GATGTGACAG
Tag586:GATTAAGTCC
Tag587:GATTGCACGC
Tag588:GATTGTCCTT
Tag589:GCAACTTCCT
Tag590:GCAAGATGTA
Tag591:GCAAGCGAAT
Tag592:GCAATCACTT
Tag593:GCAATGTAAG
Tag594:GCACAACGAC
Tag595:GCACACAGCT
Tag596:GCACACTATA
Tag597:GCACAGAAGG
Tag598:GCACCTCTTG
Tag599:GCACTCGGAA
Tag600:GCACTGCGTT
Tag601:GCACTTAATC
Tag602:GCAGAATCAA
Tag603:GCAGCCTTCA
Tag604:GAACCAATGT
Tag605:GAACCTGACG
Tag606:GAACGTACTA
Tag607:GAAGAGTTCT
Tag608:GAAGCGGTAC
Tag609:GAAGCTAGTG
Tag610:GAAGGATTAG
Tag611:GAAGGCAAGA
Tag612:GAAGTGTCGC
Tag613:GAATCGAGCC
Tag614:GAATCGCCAT
Tag615:GAATCTTCTC
Tag616:GAATGCTGAA
Tag617:GAATTACGGC
Tag618:GAATTGGACA
Tag619:GACATTCAAC
Tag620:GACATTGTCT
Tag621:GACCAGGAGT
Tag622:GACCATACCT
Tag623:GACCATCTAA
Tag624:GACGAAGCGA
Tag625:GACGACCACA
Tag626:CTCAAGGACC
Tag627:CTCAATGTGA
Tag628:CTCACAGTTG
Tag629:CTCACCTGTC
Tag630:CTCAGGCATG
Tag631:CTCAGGTGGT
Tag632:CTCATTACTC
Tag633:CTCCACTGAA
Tag634:CTCCGAAGAT
Tag635:CTCCTAACCG
Tag636:CTCCTATTGT
Tag637:CTCCTTGATT
Tag638:CTCGCAACGT
Tag639:CTCGGTGTAG
Tag640:CTCGTGCCTA
Tag641:CTCTCTCAGA
Tag642:CTGAGAAGCG
Tag643:CTGCCGACAA
Tag644:CTGGAAGTAA
Tag645:GCAGGAGATG
Tag646:GCAGGTATAC
Tag647:GCAGTACTGG
Tag648:GCAGTTGCGA
Tag649:GCATATGAGT
Tag650:GCATCCGATC
Tag651:GCATGCACCA
Tag652:GCCAAGTACA
Tag653:GCCACGATTC
Tag654:GCCATAGGTT
Tag655:GCCATATCGA
Tag656:GCCATGAGAA
Tag657:GCCGCATTGT
Tag658:GCCGTCAATA
Tag659:GCCGTTCCTT
Tag660:GCCTAACGCT
Tag661:GCCTACGTAG
Tag662:GCCTAGCAAC
Tag663:GCCTCCTCTA
Tag664:GCCTGATAGC
Tag665:GCCTGGACAT
Tag666:GCCTTAGACG
Tag667:GCGACTTAGG
Tag668:GACGGATCTC
Tag669:GACGGCCTAT
Tag670:GACGTTGGAG
Tag671:GACTATGGTA
Tag672:GACTCACATG
Tag673:GAGAACGAAG
Tag674:GAGACAAGGC
Tag675:GAGACATCTT
Tag676:GAGCAGATAT
Tag677:GAGCGAGTCA
Tag678:GAGCTCGCTA
Tag679:GAGGCTTAAC
Tag680:GAGGTGCATT
Tag681:GAGTACCATC
Tag682:GAGTAGACCA
Tag683:GAGTGTATGA
Tag684:GGCATATACC
Tag685:GGCATCGTGA
Tag686:GGCATTATTG
Tag687:GGCCAACAGA
Tag688:GGCCAGTTAC
Tag689:GGCCGAGATT
Tag690:GGCGAAGTAT
Tag691:GGCGCTATAA
Tag692:GGCGTTAAGT
Tag693:GGCTAATCGG
Tag694:GGCTATTGAT
Tag695:GGCTGCTACT
Tag696:GGCTGTCTTA
Tag697:GCGCCATATC
Tag698:GCGTAATTAC
Tag699:GCGTCAGTTG
Tag700:GCGTTAACAA
Tag701:GCTAAGCCGT
Tag702:GCTATCGACA
Tag703:GCTATTATCC
Tag704:GCTCAGTAAT
Tag705:GCTCGAACTC
Tag706:GCTCTTGGCT
Tag707:GCTGACCTGA
Tag708:GCTGACGGTT
Tag709:GCTGCTTATA
Tag710:GGTAACAATG
Tag711:GGTAAGGAAC
Tag712:GGTAATGTGT
Tag713:GGTACGCACT
Tag714:GGTACTAGAG
Tag715:GGTCCATCCA
Tag716:GGTCGTTCTG
Tag717:GGTCTGAAGA
Tag718:GGTCTTACAT
Tag719:GGTGCACCTT
Tag720:GGTGCCGAAT
Tag721:GGTGGAGTTC
Tag722:GGTGGTTGGA
Tag723:GGTGTGGATG
Tag724:GGTGTTCACC
Tag725:GGTTACCGAC
Tag726:GGTTAGATCT
Tag727:GGTTATGGCG
Tag728:GGTTCACTGG
Tag729:GGTTCCAGTT
Tag730:GGTTCCTTAA
Tag731:GGTTGATAAG
Tag732:GGTTGTGCAA
Tag733:GTAACCAGTA
Tag734:GTAACCTTGG
Tag735:GTAAGAACCT
Tag736:GTAAGGCTCC
Tag737:GTAATCCACG
Tag738:GTAATTGGTG
Tag739:GCTTGTCTAG
Tag740:GGAACGGTTG
Tag741:GGAATAAGCA
Tag742:GGAATTCCAA
Tag743:GGACGATGCT
Tag744:GGAGAATGTC
Tag745:GGAGAGGTGA
Tag746:GGAGGACAGT
Tag747:GGAGTCATCG
Tag748:GTTCATGAGG
Tag749:GTTCATTGCC
Tag750:GTTCCACTAC
Tag751:GTTCCGGTGA
Tag752:GTTCCTAACT
Tag753:GTTCGCCTTG
Tag754:GTTCGTCGAA
Tag755:GTTGAATTGG
Tag756:GTTGACGACC
Tag757:GTTGAGCGTA
Tag758:GTTGATCCGC
Tag759:GTTGCGAAGG
Tag760:GTTGGCACAA
Tag761:GTTGTATGCT
Tag762:TAACAGCGCA
Tag763:TAACCGTAGC
Tag764:TAACGAAGTG
Tag765:TAACGTCGAT
Tag766:TAACTACTCG
Tag767:TAACTGGCGG
Tag768:TAAGATTGCC
Tag769:TAAGCCTCTT
Tag770:TAAGCGACCA
Tag771:TAAGGTACGG
Tag772:GTACAGGTAG
Tag773:GTACCATAGA
Tag774:GTACTATCTG
Tag775:GTAGATGGAA
Tag776:GTAGCGGCTT
Tag777:GTAGCGTGAG
Tag778:GTAGGTCCTG
Tag779:GTAGTCAGAT
Tag780:GTATTGTGGA
Tag781:GTCAATCTTC
Tag782:GTCCACCAAT
Tag783:GTCCGCATCA
Tag784:GTCCTGGTTC
Tag785:GTCCTTCGGT
Tag786:GTCGAACCAG
Tag787:GTCGCTCTCT
Tag788:GTCGGTGACA
Tag789:GTCTAAGATC
Tag790:GTCTCGAGTG
Tag791:GTCTCTTAAG
Tag792:GTCTTCCGAG
Tag793:GTGAACACTC
Tag794:GTGACTATAC
Tag795:GTGATACGAT
Tag796:GTGATTCTCA
Tag797:GTGCAAGCAC
Tag798:GTGCAGTCCT
Tag799:GTGGACTCGA
Tag800:GTGGTGGTAT
Tag801:GTGGTTAATG
Tag802:GTGTAGGTTA
Tag803:GTGTGCCTGT
Tag804:GTGTGTGTCC
Tag805:GTTACTCATG
Tag806:GTTAGCAGCC
Tag807:TAGCCGGTTC
Tag808:TAGCCTCACA
Tag809:TAGCGAACGC
Tag810:TAGCGCCAAC
Tag811:TAGCTTCGGC
Tag812:TAGGACGCCT
Tag813:TAGGAGAGTT
Tag814:TAGGCCTTGC
Tag815:TAGGCTATAG
Tag816:TAGGTTGCAA
Tag817:TAGTAGTCTC
Tag818:TAGTCCGCTG
Tag819:TAGTCTCCGT
Tag820:TAGTGAGGAG
Tag821:TAGTGCAGTC
Tag822:TAGTGGAACT
Tag823:TAGTTACACC
Tag824:TATAACCGTG
Tag825:TATAGGCGCT
Tag826:TATCATGCAG
Tag827:TATCGTTACG
Tag828:TATGGCCGAA
Tag829:TACATACGGA
Tag830:TACATCGTTC
Tag831:TACCGTGTGT
Tag832:TACGCAGACG
Tag833:TACGGACATA
Tag834:TACTACCGCC
Tag835:TACTCATGGC
Tag836:TACTGTCAAG
Tag837:TACTTGCCAC
Tag838:TAGAGCACAT
Tag839:TATTGGTTGC
Tag840:TCAAGTGCAG
Tag841:TCAATGATCG
Tag842:TCACAGATAC
Tag843:TCACCGCCTA
Tag844:TCACGAGCGT
Tag845:TCACGCCACT
Tag846:TCACGTTGGC
Tag847:TCAGACCGAG
Tag848:TCAGCATGAC
Tag849:TCATAAGGCC
Tag850:TCATCATAGG
Tag851:TCATGGAATC
Tag852:TCATTGTCCA
Tag853:TCCAACAGGT
Tag854:TCCACACTAG
Tag855:TCCACGGTCA
Tag856:TCCACTCGCT
Tag857:TCCAGCCATC
Tag858:TCCAGGCTGT
Tag859:TCCGACTAAC
Tag860:TCCGATCTTG
Tag861:TCCGCGAAGT
Tag862:TCCGTTATCT
Tag863:TCCGTTCAGA
Tag864:TCCTAAGAGA
Tag865:TCCTATGCTC
Tag866:TCCTCTAGTA
Tag867:TCGAAGCATT
Tag868:TCGAGAGAGC
Tag869:TCGCACTTGA
Tag870:TCGCCTACTG
Tag871:TCGCGTAGCA
Tag872:TCGCTGTGGT
Tag873:TCGGAACCTC
Tag874:TCGGATAAGG
Tag875:TCGGCGTTAA
Tag876:TCGTAGGTCG
Tag877:TCGTGACCAT
Tag878:TCGTGGTGTA
Tag879:TTGGCAATTC
Tag880:TTGGCGTACT
Tag881:TTGGCTCCAC
Tag882:TTGGCTTGTG
Tag883:TTGGTAACAG
Tag884:TTGGTCAGTA
Tag885:TTGGTGGCTC
Tag886:TTGTAACGCA
Tag887:TTGTACTACG
Tag888:TTGTCGGCCA
Tag889:TTGTCTGATC
Tag890:TTGTGTTCGA
Tag891:TTGTTCGTGG
Tag892:TGTGACGTGC
Tag893:TGTGAGACAC
Tag894:TGTGATGCTT
Tag895:TGTGCACTAA
Tag896:TGTGCTTCAG
Tag897:TGTGTACCGG
Tag898:TGTTACCTCA
Tag899:TGTTCAGGAT
Tag900:TGTTCGACCG
Tag901:TGTTGTGACT
Tag902:TTAACGCTGA
Tag903:TTACACACGT
Tag904:TTACCAACAC
Tag905:TTACCAGTCT
Tag906:TTACCTCGCC
Tag907:TTACGTGGTA
Tag908:TTACTGTGAC
Tag909:TTAGACCTCC
Tag910:TTAGCTAGGT
Tag911:TTAGTGCTTG
Tag912:TTATAGGAGG
Tag913:TTATCGCGTT
Tag914:TTATGCCGCG
Tag915:TCGTTGACGC
Tag916:TCTACATCCG
Tag917:TCTACCTTGT
Tag918:TCTCCACATT
Tag919:TCTCGGACGA
Tag920:TCTCGTGAAC
Tag921:TCTCTCCTAT
Tag922:TCTCTCTGCG
Tag923:TCTGTATGGA
Tag924:TCTTCGGCTT
Tag925:TCTTGCTCGG
Tag926:TGAACCGGCT
Tag927:TGAACTAACC
Tag928:TGAAGAAGGT
Tag929:TGAAGATCCA
Tag930:TGAAGGTGTC
Tag931:TGACAAGGAA
Tag932:TGACATCTGG
Tag933:TGACCTGAGA
Tag934:TGACTCGAAG
Tag935:TGAGCGTTCC
Tag936:TGAGGAGTGG
Tag937:TGAGGCAGCA
Tag938:TGAGTACGTA
Tag939:TGCAATAGTC
Tag940:TGCACATTCT
Tag941:TGCAGCTAAG
Tag942:TGCATGAACT
Tag943:TGCCGAATCG
Tag944:TGCGACGCAA
Tag945:TGCGCTCATT
Tag946:TGCGTGCTCA
Tag947:TGCTAACTTC
Tag948:TGCTCCGAGT
Tag949:TGCTGCGTTG
Tag950:TGGAATGGAG
Tag951:TGGATAGCCG
Tag952:TGGATCTACA
Tag953:TGGCACCATG
Tag954:TGGCCAAGCT
Tag955:TGTCATTCGC
Tag956:TTCAAGCCAA
Tag957:TTCAATTCCG
Tag958:TTCACGGAAG
Tag959:TTCACGTCTT
Tag960:TTCAGGAGTA
Tag961:TTCCAGATGG
Tag962:TTCCATCGAG
Tag963:TTCCGAGACC
Tag964:TTCCTCCTGA
Tag965:TTCGAGTGAT
Tag966:TTCGGCTAGA
Tag967:TTCTACAAGC
Tag968:TTCTGTACCT
Tag969:TTCTTCTCTC
Tag970:TTGACACCTA

[10nt ed5]
Tag0:TTGTTGGCGG
Tag1:AACAACAACC
Tag2:AACAAGCCGA
Tag3:AACACACGTG
Tag4:AACACGGAAT
Tag5:AACAGTCTCT
Tag6:AACCAATAGG
Tag7:AACCATGCAC
Tag8:AACCGAGTTA
Tag9:AACCTCCGGT
Tag10:AATACCAGGA
Tag11:AATACTTCCG
Tag12:AATAGGTAGC
Tag13:AATCGAACCT
Tag14:AATCGGCGAA
Tag15:AATGCACTAC
Tag16:AATGCTGGTT
Tag17:AATTAAGGCC
Tag18:ACAACATGGT
Tag19:ACAACGCTTC
Tag20:ACAAGAGCAG
Tag21:ACACGTATGA
Tag22:ACACTCCAAG
Tag23:ACAGAAGACT
Tag24:ACAGATTCGC
Tag25:ACATGGTCCA
Tag26:ACCATTGTTG
Tag27:ACCGACACAA
Tag28:ACCGCCTATT
Tag29:ACCGGTAACG
Tag30:ACCGTGAGTC
Tag31:ACCTCTTGAA
Tag32:ACCTTACCTT
Tag33:AAGATCTGAG
Tag34:AAGCTTATCC
Tag35:AAGGCCGTCA
Tag36:AAGGTGCCTG
Tag37:AAGTCGTTGT
Tag38:ACTGGCTTGG
Tag39:ACTTAGAAGG
Tag40:ACTTCCGCAC
Tag41:AGAACCACAT
Tag42:AGAAGTGACC
Tag43:AGAATCGGTA
Tag44:AGAGGAAGTG
Tag45:ACGCAACTCG
Tag46:ACGGTTCTAA
Tag47:ACGTAGCGAT
Tag48:AGCTACTGTC
Tag49:AGCTCAACGA
Tag50:AGCTGTCATA
Tag51:AGGAGAATCA
Tag52:AGGCACAGCT
Tag53:AGGCGTGTAG
Tag54:AGTATAGCGC
Tag55:AGTCCGACTG
Tag56:AGTCCTTAAC
Tag57:ATATCCGTGG
Tag58:ATCCTAGGCG
Tag59:ATCTCGATAC
Tag60:ATGAGGCCAC
Tag61:ATGGAAGGAA
Tag62:ATTGACCGCG
Tag63:ATTGTGTTCC
Tag64:CAACCTAACA
Tag65:CAACTGGAGG
Tag66:CAAGAAGTTC
Tag67:CAAGGACAAT
Tag68:CAAGGTTGGA
Tag69:CCGAACAGTG
Tag70:CCGAATGCCA
Tag71:CCGACTAAGC
Tag72:CCGAGGTCTT
Tag73:CCGCCGTTAA
Tag74:CCGGTGGAAT
Tag75:CATTCCTCTA
Tag76:CATTGAGTGT
Tag77:CCACAATCAT
Tag78:CCACCTTGTC
Tag79:CCAGCACCTA
Tag80:CCATATGAAC
Tag81:CCATCGCAGT
Tag82:CGCTTAATTG
Tag83:CGCTTGGACA
Tag84:CGGAACTTAT
Tag85:CGGATGAGGA
Tag86:CGGTAACACC
Tag87:CGGTCATGTT
Tag88:CGTAATCCGG
Tag89:CGTAGTATAC
Tag90:CGTCAAGAAG
Tag91:CGTCTCGTGA
Tag92:CGATAGGCTG
Tag93:CGCCAGCATT
Tag94:CACTCTGCCT
Tag95:CCGTTCTTCC
Tag96:CCTGTTAGCT
Tag97:CCTTGTCGAG
Tag98:CGTGCCAATC
Tag99:CTAACGATCG
Tag100:CTACAACGGC
Tag101:CTACGTGATT
Tag102:CTATGCTAAG
Tag103:CTGGACTCTC
Tag104:CTGGTTCCGT
Tag105:CTTAGCTGCA
Tag106:CTTATTGGTC
Tag107:CTTCCATAGT
Tag108:CTTCTACCAA
Tag109:GATCACATCA
Tag110:GATGATCAGT
Tag111:GATGGAGACG
Tag112:GATTCGCCAG
Tag113:GCAATTACCG
Tag114:GCACTAGATA
Tag115:GAACTCTCGC
Tag116:GACCTATTCT
Tag117:GCAGGCGTAT
Tag118:GCCTTCAGGA
Tag119:GAGAGTACTA
Tag120:GAGGAATAAC
Tag121:GAGTTGGATC
Tag122:GGCATCCTAA
Tag123:GGCGAAGGTT
Tag124:GGCGGATTGA
Tag125:GGCGTTACAT
Tag126:GCTAAGTCAC
Tag127:GCTCCTCTTG
Tag128:GGTACGCTCT
Tag129:GGTGCAGCAA
Tag130:GGTTGTGGCT
Tag131:GTAACTCGTT
Tag132:GTAAGCGAGA
Tag133:GGAAGACCTC
Tag134:GGAGCTATGG
Tag135:GGATACAAGC
Tag136:GTTCATGACC
Tag137:GTTCGGTATA
Tag138:GTTGCCACCT
Tag139:TAAGAGCGCC
Tag140:GTGAGATGAT
Tag141:GTGCACTGGA
Tag142:GTGTACCATG
Tag143:TAGCGGCACT
Tag144:TAGGCATCGG
Tag145:TAGTGATGCA
Tag146:TACGAGGTGG
Tag147:TCCAATACTC
Tag148:TCCAGGAAGA
Tag149:TCCTCACTGG
Tag150:TCGATCAACT
Tag151:TCGCTGAGAG
Tag152:TTGGCCAAGA
Tag153:TTGGCGGTTC
Tag154:TTGTCTCGAC
Tag155:TGTGGTTATG
Tag156:TGTTACCTAC
Tag157:TTAAGCCTTG
Tag158:TTACAGTACG
Tag159:TCTCGACGTT
Tag160:TGACGTCGCA
Tag161:TGTCATTCCT
Tag162:TTCGGAGCAC
Tag163:TTCTCCTTCA

[10nt ed6]
Tag0:TTGTTGGCGC
Tag1:AACAACAACC
Tag2:AACACGCGGA
Tag3:AACCAATGTG
Tag4:AACCTGGCCT
Tag5:AATAGGTCAC
Tag6:AATGCAGAAG
Tag7:ACAACCTTAG
Tag8:ACAAGGAGTT
Tag9:ACAGATTCCA
Tag10:ACCGCTCATT
Tag11:ACCTTAACAG
Tag12:AAGGTCCTGG
Tag13:ACTTCCGCTC
Tag14:AGAATATGGC
Tag15:ACGTGTGTAA
Tag16:AGGAACGCAT
Tag17:AGGCCTACTA
Tag18:CCGAAGACGA
Tag19:CATTCGGTGT
Tag20:CCACTACTCG
Tag21:CGCTTCTTAC
Tag22:CGGACAGTTC
Tag23:CGGTTGAATG
Tag24:CGTAGTCCTT
Tag25:CCTCATGGAT
Tag26:CTAACCAGCA
Tag27:CTGGTATACC
Tag28:GATCACCTCT
Tag29:CTCTGTCAGG
Tag30:GAGTCGAGAC
Tag31:GGCATTAAGT
Tag32:GGTGGTTGGA
Tag33:GTTCCTCCAG
Tag34:TAAGCGCTTC
Tag35:GTCCGGAATC
Tag36:GTGTAAGGTT
Tag37:TCGTGCAACT
Tag38:TTAGACTGGT
Tag39:TGACGGCCAA

[10nt ed7]
Tag0:TTGTGCTGGC
Tag1:AACAACAACC
Tag2:AACCGAGGTA
Tag3:AATCATTCGG
Tag4:ACAGGCTCTT
Tag5:ACTTGGAGAG
Tag6:AGGAATGGAT
Tag7:CAAGTCCGCA
Tag8:CCGCCAATAA
Tag9:CGCTTACCTG
Tag10:CCTATTGTCC
Tag11:GGTGAGACCA
Tag12:GTTCCGTATT

[10nt ed8]
Tag0:TTGTGCATTG
Tag1:AACAACAACC
Tag2:AATCCTGGTA
Tag3:CCGAAGGTGT
Tag4:CGGTTACCAA

[10nt ed9]
Tag0:TTGTGCTTCC
Tag1:AACAACAAGG
Tag2:GCCGTTGGAA
