# Supplementary material
Source: publisher figshare collection journal article supplement (https://plos.figshare.com/articles/dataset/_/121383)
Supplement: Supplementary file 1 [file 1 › Table_S1.pdf]

Table S1. The counts of sequence tags within commercial and non-commercial sets having a minimum edit distance of three or five.

| <b>Set Name</b>                   | <b>Length<br/>(nt)</b> | <b>N<sub>tags</sub></b> | <b>Count of tags ≥<br/>edit distance 3</b> | <b>Count of tags ≥<br/>edit distance 5</b> |
|-----------------------------------|------------------------|-------------------------|--------------------------------------------|--------------------------------------------|
| Illumina TruSeq sRNA              | 6                      | 48                      | 36                                         | 3                                          |
| Hamady et al. 2007 <sup>5</sup>   | 8                      | 1544                    | 164                                        | 19                                         |
| Meyer et al. 2010 <sup>1</sup>    | 6                      | 75                      | 49                                         | 4                                          |
| Meyer et al. 2010 <sup>1</sup>    | 8                      | 711                     | 429                                        | 20                                         |
| Adey et al. 2010 <sup>6</sup>     | 9                      | 96                      | 92                                         | 15                                         |
| Illumina TruSeq RNA and DNA       | 6                      | 27                      | 21                                         | 3                                          |
| Meyer et al. 2008 <sup>3</sup>    | 7                      | 52                      | 24                                         | 3                                          |
| Meyer et al. 2008                 | 8                      | 130                     | 65                                         | 6                                          |
| Qiu et al. 2003                   | 6                      | 21                      | 21                                         | 3                                          |
| Frank 2009 <sup>2</sup>           | 6                      | 81                      | 72                                         | 4                                          |
| Illumina Nextera DNA <sup>4</sup> | 8                      | 8/12                    | 8/12                                       | 4/5                                        |
| Frank 2009 <sup>2</sup>           | 8                      | 760                     | 557                                        | 18                                         |
| Roche 454 MID Extended            | 10                     | 151                     | 151                                        | 17                                         |
| Roche 454 RL-MID Extended         | 10                     | 132                     | 132                                        | 13                                         |
